# Supplementary material for: Co-expression analysis and ceRNA network reveal eight novel potential lncRNA biomarkers in hepatocellular carcinoma
Source: PeerJ. 2019 Dec 2;7:e8101. doi: 10.7717/peerj.8101 (PMC6894432; doi:10.7717/peerj.8101)
Supplement: Table S1 [file peerj-07-8101-s001.xlsx]

## Sheet: Sheet1
A0.Samples	A3.T	A4.N	A5.M	TNM
TCGA-2Y-A9H9	T1	N0	MX	T1N0MX
TCGA-G3-A25X	T2	N0	M0	T2N0M0
TCGA-2Y-A9H5	T1	N0	MX	T1N0MX
TCGA-DD-AAE2	T1	N0	M0	T1N0M0
TCGA-DD-AACK	T1	N0	M0	T1N0M0
TCGA-FV-A3I1	T2	N0	MX	T2N0MX
TCGA-DD-A11C	T1	N0	M0	T1N0M0
TCGA-2Y-A9H0	T3	N0	M0	T3N0M0
TCGA-BC-A217	T2	NX	M0	T2NXM0
TCGA-DD-AADG	T3a	N0	M0	T3aN0M0
TCGA-5R-AA1D	T3a	N0	M0	T3aN0M0
TCGA-DD-AACE	T1	N0	M0	T1N0M0
TCGA-BC-A3KF	T1	NX	M0	T1NXM0
TCGA-DD-AADD	T1	N0	M0	T1N0M0
TCGA-2Y-A9H2	T1	N0	MX	T1N0MX
TCGA-FV-A496	T1	NX	M0	T1NXM0
TCGA-DD-A3A1	T3b	N0	M0	T3bN0M0
TCGA-DD-AACG	T2	N0	M0	T2N0M0
TCGA-ED-A4XI	T2	N0	M0	T2N0M0
TCGA-RC-A7S9	T1	N0	M0	T1N0M0
TCGA-DD-AACY	T1	N0	M0	T1N0M0
TCGA-G3-A5SJ	T1	NX	M0	T1NXM0
TCGA-WQ-AB4B	T2	NX	M0	T2NXM0
TCGA-ZS-A9CF	T2	NX	MX	T2NXMX
TCGA-G3-A7M6	T1	NX	MX	T1NXMX
TCGA-2Y-A9H7	T1	N0	MX	T1N0MX
TCGA-NI-A8LF	T1	NX	MX	T1NXMX
TCGA-DD-AAD1	T1	N0	M0	T1N0M0
TCGA-XR-A8TF	T1	NX	MX	T1NXMX
TCGA-DD-AAD3	T1	N0	M0	T1N0M0
TCGA-EP-A12J	T1	NX	MX	T1NXMX
TCGA-DD-AACM	T2	N0	M0	T2N0M0
TCGA-DD-AADN	T1	NX	MX	T1NXMX
TCGA-G3-A7M8	T1	NX	MX	T1NXMX
TCGA-2Y-A9GW	T1	N0	MX	T1N0MX
TCGA-DD-A39X	T1	NX	M0	T1NXM0
TCGA-MR-A8JO	T1	N0	MX	T1N0MX
TCGA-ED-A7PX	T2	NX	M0	T2NXM0
TCGA-2Y-A9GT	T1	NX	MX	T1NXMX
TCGA-FV-A3I0	T2	NX	M0	T2NXM0
TCGA-2Y-A9GU	T1	NX	MX	T1NXMX
TCGA-WX-AA46	T2	NX	MX	T2NXMX
TCGA-G3-AAV7	T2	N0	M0	T2N0M0
TCGA-XR-A8TG	T1	NX	M0	T1NXM0
TCGA-RC-A7SH	T2	N0	M0	T2N0M0
TCGA-CC-A3MC	T3	N0	M0	T3N0M0
TCGA-DD-AADV	T1	N0	M0	T1N0M0
TCGA-DD-AADO	T1	N0	M0	T1N0M0
TCGA-DD-A1EG	T1	N0	M0	T1N0M0
TCGA-G3-A25S	T1	N0	M0	T1N0M0
TCGA-DD-AAE0	T3a	N0	M0	T3aN0M0
TCGA-DD-A4NB	T1	N0	M0	T1N0M0
TCGA-DD-AADK	T2	N0	M0	T2N0M0
TCGA-MI-A75G	T2	N0	M0	T2N0M0
TCGA-DD-A4NE	T3a	N0	M0	T3aN0M0
TCGA-ZP-A9CY	T1	NX	MX	T1NXMX
TCGA-MI-A75E	T4	N0	M0	T4N0M0
TCGA-ZP-A9CZ	T1	NX	MX	T1NXMX
TCGA-BC-A10U	T2	NX	MX	T2NXMX
TCGA-DD-A73E	T1	N0	M0	T1N0M0
TCGA-FV-A2QR	T1	N0	M0	T1N0M0
TCGA-DD-AAE7	T1	N0	M0	T1N0M0
TCGA-CC-A5UE	T4	N0	M0	T4N0M0
TCGA-K7-A5RG	T1	NX	MX	T1NXMX
TCGA-DD-AAW2	T1	N0	M0	T1N0M0
TCGA-DD-A115	T3	N0	M0	T3N0M0
TCGA-ED-A66Y	T3a	N0	M0	T3aN0M0
TCGA-LG-A9QC	T1	NX	M0	T1NXM0
TCGA-ZP-A9D4	T1	NX	MX	T1NXMX
TCGA-BC-A110	T1	NX	MX	T1NXMX
TCGA-UB-A7MF	T3a	NX	MX	T3aNXMX
TCGA-2Y-A9GY	T2	NX	MX	T2NXMX
TCGA-5C-A9VH	T1	N0	M0	T1N0M0
TCGA-G3-A25V	T1	N0	M0	T1N0M0
TCGA-ED-A66X	T3a	N0	M0	T3aN0M0
TCGA-DD-A4NJ	T2	N0	M0	T2N0M0
TCGA-BC-A10Y	T4	NX	MX	T4NXMX
TCGA-CC-A123	T3	N0	M0	T3N0M0
TCGA-G3-AAV1	T4	N0	M0	T4N0M0
TCGA-BC-A69H	T2	NX	M0	T2NXM0
TCGA-DD-AAW1	T3	N0	M0	T3N0M0
TCGA-DD-AAVV	T2	N0	M0	T2N0M0
TCGA-DD-AACH	T2	N0	M0	T2N0M0
TCGA-RC-A7SB	T2	N0	M0	T2N0M0
TCGA-DD-AAEK	T2	N0	M0	T2N0M0
TCGA-DD-A73G	T1	N0	M0	T1N0M0
TCGA-DD-AACA	T1	N0	M0	T1N0M0
TCGA-DD-A1EI	T1	N0	M0	T1N0M0
TCGA-PD-A5DF	T4	N0	M0	T4N0M0
TCGA-DD-AAVS	T1	N0	M0	T1N0M0
TCGA-G3-A5SK	T1	NX	M0	T1NXM0
TCGA-DD-AAEB	T1	N0	M0	T1N0M0
TCGA-DD-A1EB	T1	N0	M0	T1N0M0
TCGA-DD-AAVP	T1	N0	M0	T1N0M0
TCGA-RC-A7SF	T1	N0	M0	T1N0M0
TCGA-G3-AAV3	T2	N0	M0	T2N0M0
TCGA-DD-A114	T2		M0	T2M0
TCGA-RC-A6M4	T3	NX	MX	T3NXMX
TCGA-UB-A7MA	T2b	N0	M0	T2bN0M0
TCGA-DD-AACS	T1	N0	M0	T1N0M0
TCGA-G3-AAV2	T1	N0	M0	T1N0M0
TCGA-BC-A5W4	T3a	NX	M0	T3aNXM0
TCGA-XR-A8TC	T1	NX	MX	T1NXMX
TCGA-MR-A520	T1	NX	MX	T1NXMX
TCGA-XR-A8TE	T3	N0	MX	T3N0MX
TCGA-DD-AAVR	T1	N0	M0	T1N0M0
TCGA-DD-A4NK	T3	N0	M0	T3N0M0
TCGA-FV-A4ZQ	T1	NX	M0	T1NXM0
TCGA-CC-A9FW	T3	N0	M0	T3N0M0
TCGA-EP-A3RK	T3a	NX	MX	T3aNXMX
TCGA-ED-A7XP	T2	N0	M0	T2N0M0
TCGA-4R-AA8I	T2	NX	MX	T2NXMX
TCGA-DD-AAW0	T1	N0	M0	T1N0M0
TCGA-DD-AAW3	T1	N0	M0	T1N0M0
TCGA-DD-A4NG	T3a	NX	M0	T3aNXM0
TCGA-KR-A7K8	T1	N0	M0	T1N0M0
TCGA-ED-A627	T1	NX	M0	T1NXM0
TCGA-BC-A10Z	T1	N0	MX	T1N0MX
TCGA-5R-AAAM	T2	N0	M0	T2N0M0
TCGA-UB-A7ME	T1	NX	MX	T1NXMX
TCGA-WX-AA44	T1	NX	MX	T1NXMX
TCGA-BC-A3KG	T2	N0	M0	T2N0M0
TCGA-DD-A73B	T1	N0	M0	T1N0M0
TCGA-DD-AADS	T1	N0	M0	T1N0M0
TCGA-UB-A7MB	T2	NX	MX	T2NXMX
TCGA-RC-A7SK	T1	N0	M0	T1N0M0
TCGA-DD-AAEE	T1	N0	M0	T1N0M0
TCGA-YA-A8S7	T3a	N0	MX	T3aN0MX
TCGA-BC-A10W	T4	NX	MX	T4NXMX
TCGA-CC-A5UC	T3	N0	M0	T3N0M0
TCGA-CC-A8HT	T3	N0	M0	T3N0M0
TCGA-CC-5259	T4	N0	M0	T4N0M0
TCGA-CC-A8HS	T3	N1	M0	T3N1M0
TCGA-2Y-A9GZ	T2	NX	MX	T2NXMX
TCGA-2Y-A9H4	T1	N0	MX	T1N0MX
TCGA-DD-A73A	T1	N0	M0	T1N0M0
TCGA-DD-AADB	T1	N0	M0	T1N0M0
TCGA-DD-AACL	T1	N0	M0	T1N0M0
TCGA-2Y-A9GV	T1	NX	MX	T1NXMX
TCGA-DD-AAD0	T1	N0	M0	T1N0M0
TCGA-DD-AAE9	T1	N0	M0	T1N0M0
TCGA-BC-4073	T3	N0	MX	T3N0MX
TCGA-DD-AACF	T1	N0	M0	T1N0M0
TCGA-DD-A11A	T1	N0	M0	T1N0M0
TCGA-DD-A4NA	T2	N1	M0	T2N1M0
TCGA-KR-A7K2	T1	N0	M0	T1N0M0
TCGA-DD-AAD2	T1	N0	M0	T1N0M0
TCGA-DD-AAD6	T3a	N0	M0	T3aN0M0
TCGA-DD-A73C	T3a	N0	M0	T3aN0M0
TCGA-G3-A7M5	T1	NX	MX	T1NXMX
TCGA-DD-A1E9	T1	N0	M0	T1N0M0
TCGA-BW-A5NO	T3a	NX	MX	T3aNXMX
TCGA-DD-AACP	T1	N0	M0	T1N0M0
TCGA-FV-A2QQ	T1	N0	MX	T1N0MX
TCGA-DD-AACJ	T2	N0	M0	T2N0M0
TCGA-HP-A5MZ	T1	NX	M0	T1NXM0
TCGA-BW-A5NP	T2	N0	M1	T2N0M1
TCGA-DD-A3A2	T1	N0	M0	T1N0M0
TCGA-DD-A4NO	T1	N0	M0	T1N0M0
TCGA-ZP-A9D0	T1	NX	MX	T1NXMX
TCGA-DD-AADY	T1	N0	M0	T1N0M0
TCGA-DD-AADA	T1	N0	M0	T1N0M0
TCGA-2Y-A9HB	T1	NX	MX	T1NXMX
TCGA-DD-AACT	T1	N0	M0	T1N0M0
TCGA-DD-A73F	T1	N0	M0	T1N0M0
TCGA-G3-A25Z	T1	N0	M0	T1N0M0
TCGA-CC-A3MB	T3	N0	M0	T3N0M0
TCGA-DD-A1EK	T4	N0	M1	T4N0M1
TCGA-DD-A116	T3	N0	M0	T3N0M0
TCGA-BW-A5NQ	T1	NX	MX	T1NXMX
TCGA-DD-A4NQ	T2	N0	M0	T2N0M0
TCGA-G3-A7M9	T3b	NX	MX	T3bNXMX
TCGA-GJ-A6C0	T2	NX	MX	T2NXMX
TCGA-CC-A7II	T3	N0	M0	T3N0M0
TCGA-G3-A3CK	T1	N0	M0	T1N0M0
TCGA-DD-AAE1	T1	N0	M0	T1N0M0
TCGA-5C-A9VG	T2	N0	M0	T2N0M0
TCGA-G3-AAV5	T2	N0	M0	T2N0M0
TCGA-LG-A9QD	T3a	N0	M0	T3aN0M0
TCGA-ZP-A9D2	T2	NX	MX	T2NXMX
TCGA-BD-A2L6	T2	NX	MX	T2NXMX
TCGA-DD-AADM	T2	N0	M0	T2N0M0
TCGA-DD-A3A3	T1	N0	M0	T1N0M0
TCGA-DD-AAEI	T1	N0	M0	T1N0M0
TCGA-CC-A7IK	T3	N0	M0	T3N0M0
TCGA-CC-A9FU	T3a	N0	M0	T3aN0M0
TCGA-RC-A6M3	T2	N0	M0	T2N0M0
TCGA-3K-AAZ8	T3b	NX	MX	T3bNXMX
TCGA-DD-A1EJ	T1	N1	M0	T1N1M0
TCGA-UB-AA0V		NX	MX	NXMX
TCGA-FV-A3R3	T1	NX	MX	T1NXMX
TCGA-DD-AAVW	T1	N0	M0	T1N0M0
TCGA-G3-AAV4	T1	N0	M0	T1N0M0
TCGA-DD-AADJ	T1	N0	M0	T1N0M0
TCGA-RG-A7D4	T2	N0	M0	T2N0M0
TCGA-DD-AAVU	T2	N0	M0	T2N0M0
TCGA-BC-A10R	T3	NX	MX	T3NXMX
TCGA-DD-A73D	T2	NX	MX	T2NXMX
TCGA-DD-AACO	T1	N0	M0	T1N0M0
TCGA-DD-AADL	T1	N0	M0	T1N0M0
TCGA-5C-AAPD	T2	N0	M0	T2N0M0
TCGA-2Y-A9H8	T1	NX	MX	T1NXMX
TCGA-DD-AA3A	T1	N0	MX	T1N0MX
TCGA-CC-A8HV	T2	N0	M0	T2N0M0
TCGA-BC-A10T	T4	NX	MX	T4NXMX
TCGA-G3-A3CG	T1	N0	M0	T1N0M0
TCGA-G3-A5SM	T2	NX	M0	T2NXM0
TCGA-O8-A75V	T1	NX	MX	T1NXMX
TCGA-DD-AAC9	T1	N0	M0	T1N0M0
TCGA-ZS-A9CD	T2	NX	MX	T2NXMX
TCGA-2Y-A9H1	T1	NX	MX	T1NXMX
TCGA-G3-A25W	T3b	N0	M0	T3bN0M0
TCGA-K7-A5RF	T1	NX	MX	T1NXMX
TCGA-G3-A7M7	T1	NX	MX	T1NXMX
TCGA-DD-AACZ	T1	N0	M0	T1N0M0
TCGA-BD-A3ER	T2	NX	MX	T2NXMX
TCGA-EP-A3JL	T1	NX	MX	T1NXMX
TCGA-DD-AAD8	T1	N0	M0	T1N0M0
TCGA-UB-AA0U	T2	NX	MX	T2NXMX
TCGA-DD-A1EL	T2	N0	M0	T2N0M0
TCGA-DD-A3A4	T3	N0	M0	T3N0M0
TCGA-2Y-A9H3	T2	NX	MX	T2NXMX
TCGA-DD-A4ND	T1	N0	M0	T1N0M0
TCGA-DD-AAC8	T1	N0	M0	T1N0M0
TCGA-5R-AA1C	T2	N0	M0	T2N0M0
TCGA-ED-A82E	T3a	N0	M0	T3aN0M0
TCGA-DD-AAVQ	T1	N0	M0	T1N0M0
TCGA-ED-A8O6	T3a	N0	M0	T3aN0M0
TCGA-DD-AACB	T1	N0	M0	T1N0M0
TCGA-ZP-A9CV	T1	NX	MX	T1NXMX
TCGA-G3-A25Y	T1	N0	M0	T1N0M0
TCGA-CC-A7IE	T3	N0	M0	T3N0M0
TCGA-FV-A23B	T2	N0	M0	T2N0M0
TCGA-ZP-A9D1	T1	NX	MX	T1NXMX
TCGA-BC-A10Q	T2	NX	MX	T2NXMX
TCGA-ZS-A9CG	T2	NX	MX	T2NXMX
TCGA-DD-A3A6	T2	N0	M0	T2N0M0
TCGA-BC-A69I	T1	N0	M0	T1N0M0
TCGA-DD-A39V	T2	NX	M0	T2NXM0
TCGA-DD-AACD	T1	N0	M0	T1N0M0
TCGA-G3-A5SL	T2	NX	M0	T2NXM0
TCGA-CC-A8HU	T3	N0	M0	T3N0M0
TCGA-DD-AAD5	T1	N0	M0	T1N0M0
TCGA-MI-A75C	T1	N0	M0	T1N0M0
TCGA-MI-A75I	T2	NX	MX	T2NXMX
TCGA-ED-A459	T2	N0	M0	T2N0M0
TCGA-BC-4072	T3	N0	M0	T3N0M0
TCGA-DD-A39Y	T1	NX	M0	T1NXM0
TCGA-MI-A75H		NX	MX	NXMX
TCGA-DD-AACU	T1	N0	M0	T1N0M0
TCGA-CC-5262	T4	N0	M0	T4N0M0
TCGA-DD-AADU	T2	N0	M0	T2N0M0
TCGA-WX-AA47	T3a	NX	MX	T3aNXMX
TCGA-XR-A8TD	T3	N0	M0	T3N0M0
TCGA-DD-AADE	T1	N0	M0	T1N0M0
TCGA-ES-A2HS	T1	NX	MX	T1NXMX
TCGA-CC-A7IL	T3	N0	M0	T3N0M0
TCGA-G3-A3CI	T1	N0	M0	T1N0M0
TCGA-CC-5261	T2	N0	M0	T2N0M0
TCGA-EP-A2KB	T1	NX	MX	T1NXMX
TCGA-CC-A5UD	T3	N0	M0	T3N0M0
TCGA-DD-AACV	T1	N0	M0	T1N0M0
TCGA-DD-AACI	T2	N0	M0	T2N0M0
TCGA-DD-A4NP	T1	N0	M0	T1N0M0
TCGA-DD-AAVX	T2	N0	M0	T2N0M0
TCGA-CC-5264	T3	N0	M0	T3N0M0
TCGA-NI-A4U2	T3	NX	MX	T3NXMX
TCGA-CC-A9FS	T2	N0	M0	T2N0M0
TCGA-RC-A6M6	T2	NX	M0	T2NXM0
TCGA-DD-AAVY	T3	N0	M0	T3N0M0
TCGA-G3-AAV6	T3a	N0	M0	T3aN0M0
TCGA-LG-A6GG	T2	NX	M0	T2NXM0
TCGA-K7-A6G5	T1	N0	MX	T1N0MX
TCGA-G3-A25T	T3	N0	M0	T3N0M0
TCGA-ED-A5KG	T2	N0	M0	T2N0M0
TCGA-DD-A4NI	T2	NX	M0	T2NXM0
TCGA-G3-AAUZ	T1	N0	M0	T1N0M0
TCGA-2Y-A9H6	T1	NX	MX	T1NXMX
TCGA-DD-AACW	T1	N0	M0	T1N0M0
TCGA-CC-5263	T3	N0	M0	T3N0M0
TCGA-KR-A7K0	T1	N0	M0	T1N0M0
TCGA-CC-A7IJ	T2	N0	M0	T2N0M0
TCGA-BC-A8YO	T4	N0	M0	T4N0M0
TCGA-DD-AADF	T1	N0	M0	T1N0M0
TCGA-DD-A119	T3a	N0	M1	T3aN0M1
TCGA-DD-A39W	T3	N0	M0	T3N0M0
TCGA-G3-A25U	T1	N0	M0	T1N0M0
TCGA-DD-A3A9	T4	N0	M1	T4N0M1
TCGA-EP-A2KC	T1	NX	MX	T1NXMX
TCGA-DD-A1EF	T1	N0	M0	T1N0M0
TCGA-DD-AACC	T1	N0	M0	T1N0M0
TCGA-RC-A6M5	T1	N1	M0	T1N1M0
TCGA-KR-A7K7	T2	N0	M0	T2N0M0
TCGA-DD-A113	T2	N0	M0	T2N0M0
TCGA-G3-A3CJ	T2	N0	M0	T2N0M0
TCGA-WQ-A9G7	T3a	NX	M0	T3aNXM0
TCGA-DD-A11D	T1	N0	M0	T1N0M0
TCGA-CC-5260	T4	N0	M0	T4N0M0
TCGA-ED-A7XO	T3a	N0	M0	T3aN0M0
TCGA-BC-A216	T3	NX	M0	T3NXM0
TCGA-DD-AAVZ	T1	N0	M0	T1N0M0
TCGA-WJ-A86L	T1	NX	MX	T1NXMX
TCGA-FV-A495	T2	NX	M0	T2NXM0
TCGA-DD-AAE6	T1	N0	M0	T1N0M0
TCGA-GJ-A9DB	T1	N0	MX	T1N0MX
TCGA-BC-A10S	T3	NX	MX	T3NXMX
TCGA-DD-AADR	T1	N0	M0	T1N0M0
TCGA-DD-A3A7	T3b	N0	M0	T3bN0M0
TCGA-BC-A112	T3	NX	MX	T3NXMX
TCGA-G3-A3CH	T3a	N0	M0	T3aN0M0
TCGA-DD-AAED	T1	N0	M0	T1N0M0
TCGA-DD-A1EH	T3	N0	M0	T3N0M0
TCGA-DD-AAEA	T1	N0	M0	T1N0M0
TCGA-FV-A3R2	T1	NX	MX	T1NXMX
TCGA-ES-A2HT	T1	NX	MX	T1NXMX
TCGA-DD-A11B	T1	N0	M0	T1N0M0
TCGA-DD-A39Z	T2	NX	M0	T2NXM0
TCGA-CC-5258	T2	N0	M0	T2N0M0
TCGA-ED-A7PZ	T2	NX	M0	T2NXM0
TCGA-G3-AAV0	T1	N0	M0	T1N0M0
TCGA-DD-AADP	T1	N0	M0	T1N0M0
TCGA-DD-AAEH	T1	N0	M0	T1N0M0
TCGA-CC-A9FV	T3	N0	M0	T3N0M0
TCGA-DD-A1EA	T2	N0	M0	T2N0M0
TCGA-2V-A95S	T2	NX	MX	T2NXMX
TCGA-DD-A4NH	T3b	N0	M0	T3bN0M0
TCGA-DD-A1EE	T3	N0	M0	T3N0M0
TCGA-BC-A10X	T3a	N0	MX	T3aN0MX
TCGA-DD-AADW	T1	N0	M0	T1N0M0
TCGA-UB-A7MC	T3a	N0	MX	T3aN0MX
TCGA-DD-A1EC	T1	N0	M0	T1N0M0
TCGA-T1-A6J8	T1	NX	M0	T1NXM0
TCGA-ED-A8O5	T3a	N0	M0	T3aN0M0
TCGA-CC-A7IH	T3	N0	M0	T3N0M0
TCGA-QA-A7B7	T2	NX	MX	T2NXMX
TCGA-2Y-A9GS	T2	NX	MX	T2NXMX
TCGA-ED-A97K	T3a	N0	M0	T3aN0M0
TCGA-HP-A5N0	TX	NX	M0	TXNXM0
TCGA-DD-A4NR	T1	N0	M0	T1N0M0
TCGA-2Y-A9GX	T1	NX	MX	T1NXMX
TCGA-DD-AADQ	T2	N0	M0	T2N0M0
TCGA-DD-AAEG	T1	N0	M0	T1N0M0
TCGA-DD-AADI	T1	N0	M0	T1N0M0
TCGA-CC-A1HT	T3	N0	M0	T3N0M0
TCGA-CC-A7IG	T2	N0	M0	T2N0M0
TCGA-DD-A4NF	T1	N0	M0	T1N0M0
TCGA-CC-A3M9	T3	N0	M0	T3N0M0
TCGA-DD-AAE8	T1	N0	M0	T1N0M0
TCGA-G3-A5SI	T2	N0	M0	T2N0M0
TCGA-DD-A4NV	T3	N0	M0	T3N0M0
TCGA-DD-A3A8	T2	N0	M0	T2N0M0
TCGA-DD-A3A5	T3	N0	M0	T3N0M0
TCGA-DD-AACX	T2	N0	M0	T2N0M0
TCGA-GJ-A3OU	T1	NX	MX	T1NXMX
TCGA-DD-AAE4	T1	N0	M0	T1N0M0
TCGA-CC-A7IF	T3	N0	M0	T3N0M0
TCGA-DD-AADC	T1	N0	M0	T1N0M0
TCGA-BD-A3EP	T1	N0	M0	T1N0M0
TCGA-DD-A4NS	T1	N0	M0	T1N0M0
TCGA-DD-AACQ	T2	N0	M0	T2N0M0
TCGA-DD-A4NN	T1	N0	M0	T1N0M0
TCGA-DD-AAE3	T1	N0	M0	T1N0M0
TCGA-DD-A1ED	T1	N0	M0	T1N0M0
TCGA-DD-AACN	T1	N0	M0	T1N0M0
TCGA-DD-A4NL	T1	N0	M0	T1N0M0
TCGA-CC-A3MA	T3	N0	M0	T3N0M0
TCGA-2Y-A9HA	T2	NX	MX	T2NXMX
TCGA-EP-A26S	T1	N0	MX	T1N0MX
TCGA-UB-A7MD	T1	N0	MX	T1N0MX
TCGA-G3-A6UC	T3b	N0	M0	T3bN0M0
TCGA-FV-A4ZP	T3	NX	M0	T3NXM0
TCGA-DD-A118	T2	N0	M0	T2N0M0
TCGA-K7-AAU7	T2a	NX	MX	T2aNXMX
TCGA-EP-A2KA	T3a	NX	MX	T3aNXMX
TCGA-ZS-A9CE	T2	NX	MX	T2NXMX
TCGA-ED-A7PY	T2	NX	M0	T2NXM0
TCGA-DD-A3A0	T1	NX	M0	T1NXM0
