# Supplementary material for: Co-expression analysis and ceRNA network reveal eight novel potential lncRNA biomarkers in hepatocellular carcinoma
Source: PeerJ. 2019 Dec 2;7:e8101. doi: 10.7717/peerj.8101 (PMC6894432; doi:10.7717/peerj.8101)
Supplement: Table S2 [file peerj-07-8101-s002.xlsx]

## Sheet: edgerOutlnc
	logFC	logCPM	PValue	FDR
LINC01419	10.1171	9.10442	2.35e-23	6.9e-21
LINC02241	9.11866	7.50361	2.65e-21	4.96e-19
LINC01287	9.00199	9.97353	3.38e-18	3.02e-16
AL591686.1	8.14895	6.64338	1.31e-08	1.21e-07
AC245100.6	7.84278	6.93769	1.27e-21	2.53e-19
AC090502.1	7.69386	7.19984	6.43e-19	7.09e-17
LINC02476	7.66761	6.46839	1.17e-20	2.01e-18
LINC00942	7.62976	8.72401	6.76e-19	7.33e-17
TMEM132D-AS1	7.53891	6.40343	3.51e-11	5.86e-10
Z82249.1	7.5061	6.02004	1.72e-07	1.21e-06
LINC00221	7.49054	7.87619	7.34e-17	4.32e-15
LINC01833	7.44626	6.27851	4.16e-15	1.7e-13
LINC01194	7.321	5.80231	1.46e-16	8.14e-15
PART1	7.30866	7.52158	3.39e-12	7.68e-11
AFAP1-AS1	7.30606	9.44565	1.28e-26	7.2e-24
AL691420.1	7.24869	5.34404	4.02e-19	4.52e-17
AC009646.2	7.15141	6.24424	1.77e-07	1.24e-06
HOTTIP	6.94313	6.83003	7.99e-26	3.7e-23
AC025254.1	6.93081	5.10148	1.89e-13	5.4e-12
DSCR8	6.92122	6.51848	1.98e-16	1.06e-14
LINC01980	6.83355	6.77588	4.46e-18	3.84e-16
LINC01667	6.82089	6.26922	5.95e-11	9.33e-10
LINC01792	6.75845	5.73328	1.13e-11	2.22e-10
LINC01234	6.72613	8.30766	2.84e-19	3.37e-17
LINC00355	6.72027	5.31948	1.57e-17	1.18e-15
AC105118.1	6.66911	5.33404	9.35e-16	4.28e-14
AC090809.1	6.63538	5.04915	5.02e-13	1.34e-11
DSCR4	6.56288	5.19342	2.39e-10	3.32e-09
LINC02163	6.56148	5.20373	3.87e-20	5.2e-18
AL162413.1	6.54531	5.16789	5.47e-16	2.62e-14
AL359313.1	6.54389	5.64193	1.45e-14	5.16e-13
AC005150.1	6.48378	5.08354	1.28e-11	2.45e-10
LINC01532	6.48204	5.56932	1.72e-22	4.26e-20
AC005186.1	6.47594	7.09779	1.48e-14	5.23e-13
AC099552.1	6.4621	4.74482	7.76e-11	1.19e-09
SSTR5-AS1	6.42928	8.95692	1.63e-15	7.13e-14
MAFA-AS1	6.41863	5.08202	1.57e-17	1.18e-15
SACS-AS1	6.41577	5.38271	1.22e-09	1.44e-08
AC006065.4	6.41077	5.96104	2.73e-14	9.2e-13
MIR548XHG	6.40423	5.08986	1.14e-12	2.82e-11
LINC02404	6.39837	5.93606	3.41e-14	1.13e-12
AC069061.2	6.39618	4.89359	1.07e-09	1.28e-08
MNX1-AS1	6.37312	5.57208	4.7e-11	7.56e-10
LINC02475	6.35054	5.85346	3.1e-25	1.13e-22
AC026336.3	6.34798	6.18685	2.21e-06	1.19e-05
AL138900.2	6.34349	4.86706	1.03e-09	1.25e-08
AC109588.1	6.33886	5.04928	4.5e-12	9.9e-11
AL136537.2	6.30999	4.98512	2.85e-17	1.94e-15
LINC02377	6.2948	5.24226	4.91e-16	2.39e-14
AC139769.2	6.29264	6.68797	2.55e-12	5.92e-11
IGFL2-AS1	6.2805	6.04448	3.78e-10	4.97e-09
NPSR1-AS1	6.27681	6.62066	1.7e-17	1.24e-15
AC103770.1	6.22591	6.26332	3.7e-10	4.88e-09
LINC01611	6.19217	4.72031	3.39e-14	1.13e-12
LINC00906	6.18214	4.93309	1.39e-14	4.99e-13
AC004870.2	6.12376	4.62312	1.17e-08	1.1e-07
HOXA11-AS	6.11852	5.12779	2.36e-15	1.03e-13
AP000593.3	6.09616	7.0671	1.15e-17	9.01e-16
AC004080.2	6.03091	4.61994	2.82e-24	9.68e-22
AF279873.3	5.99988	4.98131	1.74e-11	3.25e-10
LINC01568	5.99625	4.76596	6.65e-06	3.12e-05
LINC01231	5.99409	4.38765	6.86e-07	4.23e-06
AC113145.1	5.97709	4.37595	7.6e-09	7.44e-08
AC016710.1	5.96197	4.58804	1.85e-11	3.4e-10
LINC01019	5.93837	5.07347	1.36e-11	2.59e-10
AC090192.2	5.91593	5.14566	5.99e-14	1.88e-12
AC091987.1	5.89017	4.51957	4.68e-18	3.96e-16
FAM230C	5.88733	4.7267	4.51e-11	7.29e-10
AC092447.8	5.87839	4.5906	3.78e-07	2.43e-06
ADGRD1-AS1	5.87453	4.80202	6.12e-09	6.18e-08
AC112178.1	5.85178	4.8265	4.87e-14	1.57e-12
LINC02525	5.84075	4.89889	3.02e-11	5.21e-10
AC024230.1	5.7762	4.73791	2.99e-18	2.72e-16
LINC01608	5.7593	5.4537	8.66e-13	2.22e-11
AL157778.1	5.74928	4.61	3.24e-13	8.89e-12
CLLU1	5.73897	5.7761	9.17e-10	1.12e-08
FEZF1-AS1	5.73154	6.84676	3.28e-22	7.24e-20
AC114485.1	5.72702	4.25734	8.07e-11	1.23e-09
AC016550.2	5.72076	4.4061	2.66e-17	1.83e-15
ST8SIA6-AS1	5.68149	8.41638	8.38e-26	3.7e-23
AC011503.1	5.67722	6.18327	2.05e-17	1.46e-15
LINC02335	5.66927	4.61952	7.86e-15	3.05e-13
AC062015.1	5.66834	4.34422	2.15e-08	1.87e-07
AL954650.1	5.64668	4.42713	1.98e-07	1.37e-06
HAGLR	5.63134	8.5265	6.23e-34	1.28e-30
CASC20	5.62912	4.83755	5.43e-12	1.16e-10
AL731684.1	5.62873	5.24519	7.16e-15	2.82e-13
AC092957.1	5.59379	4.59321	5.81e-14	1.83e-12
AL109807.1	5.58156	4.32961	4.26e-05	0.000162739
SOX21-AS1	5.57222	5.96094	9.62e-10	1.17e-08
AC099786.2	5.56143	4.03246	2.36e-05	9.58e-05
AC114489.1	5.54354	4.25581	5.14e-11	8.17e-10
AC016717.2	5.52541	5.56332	4.23e-09	4.46e-08
LINC02413	5.50279	5.61588	1.01e-09	1.23e-08
PINCR	5.47972	4.34129	1.71e-08	1.53e-07
AC008060.1	5.47705	4.35106	1.78e-09	2.04e-08
LINC00958	5.46511	6.12877	1.35e-09	1.58e-08
AC079466.1	5.44989	9.88683	1.38e-16	7.85e-15
CTD-2297D10.2	5.4393	5.86111	1.41e-11	2.67e-10
LINC01164	5.43919	5.16853	1.43e-08	1.31e-07
SFTA1P	5.41715	4.82976	1.2e-44	7.4e-41
AC099520.1	5.38816	4.03004	1.64e-17	1.22e-15
AC092625.1	5.38482	4.03695	1.15e-11	2.25e-10
AC003985.2	5.36022	4.82963	3.6e-08	2.97e-07
AC008060.4	5.35411	3.99762	1.7e-08	1.52e-07
LINC02119	5.35178	5.86134	1.8e-07	1.26e-06
LINC01956	5.3391	5.4154	3.41e-10	4.56e-09
AP000844.2	5.29753	4.89544	5.15e-08	4.12e-07
LINC00601	5.2855	4.61599	1.6e-07	1.14e-06
AC010595.1	5.27471	4.39947	6.08e-13	1.61e-11
AC020637.1	5.24677	4.59688	1.53e-07	1.09e-06
C8orf87	5.2348	3.96984	2.27e-06	1.21e-05
LINC00879	5.23036	4.37282	2.64e-09	2.9e-08
AC125603.1	5.20399	4.7182	1.53e-10	2.19e-09
AL133467.4	5.20121	4.37424	1.24e-12	3.03e-11
AC108865.1	5.19091	4.98225	8.92e-10	1.1e-08
AC093515.1	5.18725	3.92383	8.54e-15	3.27e-13
LINC02588	5.17787	4.50655	6.42e-15	2.55e-13
AL117329.1	5.17304	4.37374	8.21e-15	3.17e-13
LINC02492	5.1687	4.04735	1.25e-10	1.84e-09
LINC00491	5.16112	4.02521	2.66e-11	4.7e-10
AC005722.3	5.1575	4.2141	7.38e-09	7.26e-08
AC131391.1	5.1291	4.03524	7.59e-12	1.57e-10
AC010880.1	5.11951	4.01315	1.35e-06	7.72e-06
ZNF385D-AS1	5.11581	3.88262	3.64e-10	4.81e-09
AP002478.1	5.09812	4.49313	3.58e-10	4.75e-09
ERVMER61-1	5.08803	4.64789	2e-08	1.75e-07
AC106771.1	5.07835	4.02151	3.38e-12	7.68e-11
AP001803.2	5.05734	4.12232	0.000109155	0.000377158
LINC01202	5.03079	3.84942	1.47e-09	1.71e-08
AC109830.1	5.02809	3.99453	8.84e-13	2.26e-11
AC122710.1	5.02531	4.12011	6.16e-09	6.2e-08
AL365226.2	5.02336	4.4959	8.25e-09	8.01e-08
LINC02466	5.0121	3.8339	8.58e-15	3.27e-13
LINC01559	4.9844	7.30868	1.05e-09	1.27e-08
AC078993.1	4.97421	7.12645	9.36e-18	7.51e-16
DLX6-AS1	4.97289	5.39857	2.64e-10	3.61e-09
AL162725.2	4.96275	3.83868	3.42e-05	0.000133843
AL139042.1	4.95789	3.9786	1.57e-09	1.81e-08
LINC00648	4.93005	5.49983	1.37e-10	2e-09
AL035401.1	4.92942	4.1639	3.85e-16	1.9e-14
AC116049.2	4.88472	4.95227	8.74e-18	7.1e-16
AC106892.1	4.87666	4.16318	4.14e-06	2.06e-05
MIR663AHG	4.87183	4.25557	1.48e-08	1.34e-07
AC093895.1	4.86503	4.93377	2.26e-17	1.57e-15
PLCE1-AS1	4.823	4.66681	2.31e-09	2.58e-08
AC090541.1	4.82023	4.51835	1.3e-06	7.45e-06
LINC01992	4.81945	3.99499	2.06e-07	1.43e-06
AC011632.1	4.80867	4.79075	4.45e-09	4.66e-08
LINC01697	4.80539	5.70452	1.14e-08	1.07e-07
AC010333.1	4.77529	4.40605	1.23e-11	2.39e-10
AC108865.2	4.77416	4.39738	1.95e-08	1.72e-07
G2E3-AS1	4.77287	4.48695	2.46e-10	3.41e-09
CLDN10-AS1	4.77141	4.09523	5.36e-06	2.58e-05
AC117386.2	4.76303	5.29585	2.85e-16	1.47e-14
AC008991.1	4.71023	3.93139	3.74e-09	3.99e-08
LINC02583	4.70006	4.26045	9.7e-05	0.000340471
AC007128.1	4.683	3.92989	7.55e-09	7.41e-08
LINC02267	4.66093	4.0575	1.57e-09	1.81e-08
LINC01446	4.66083	6.05792	6.16e-10	7.83e-09
AC108517.1	4.66045	3.65999	6.29e-06	2.97e-05
C10orf71-AS1	4.6591	3.60924	7.03e-09	6.93e-08
AC069277.1	4.6549	4.52044	1.09e-11	2.18e-10
LINC01524	4.64981	4.30378	1.15e-11	2.25e-10
AC107973.1	4.63306	3.62834	3.59e-07	2.32e-06
AP003900.1	4.63071	3.65915	6.6e-09	6.57e-08
DSCR4-IT1	4.5998	3.64697	5.64e-08	4.47e-07
AC110285.3	4.58219	4.29925	9.67e-07	5.71e-06
MIR2052HG	4.58195	4.5581	1.07e-13	3.21e-12
LINC01022	4.57785	3.9276	3.57e-06	1.81e-05
SRGAP3-AS2	4.57369	3.97192	1.29e-06	7.38e-06
Z82214.2	4.56856	4.01925	1.15e-07	8.48e-07
LINC01630	4.55818	4.44186	1.65e-08	1.49e-07
LINC02184	4.52968	3.63848	1.39e-05	6.02e-05
LINC02327	4.52942	4.40206	5.74e-10	7.35e-09
AL139023.1	4.52002	4.15203	3.11e-11	5.31e-10
AC107419.1	4.51917	4.63145	4.13e-15	1.7e-13
AC051618.1	4.50111	3.729	0.000122955	0.000421074
HAGLROS	4.49224	4.51981	2.11e-32	3.25e-29
LINC02200	4.47462	5.2815	1.41e-07	1.02e-06
LINC01436	4.47134	8.02664	9.7e-12	1.95e-10
AC010894.3	4.46463	5.96909	1.43e-15	6.33e-14
AC100803.1	4.46222	4.35317	2.67e-10	3.64e-09
AC026320.1	4.45596	3.58577	6.07e-09	6.15e-08
LINC01224	4.45244	6.0127	1.4e-14	4.99e-13
AC138965.2	4.44896	3.67159	1.57e-08	1.42e-07
AL139275.2	4.44568	3.54472	1.67e-08	1.51e-07
AC011840.1	4.44009	4.24189	4.82e-07	3.06e-06
AL121721.1	4.43717	3.88718	2.34e-09	2.61e-08
HOXC-AS1	4.43524	3.54313	9.47e-08	7.13e-07
AC106895.1	4.43301	3.81044	1.42e-06	8.05e-06
FAM242A	4.41621	3.70717	5.98e-05	0.000219351
AL133467.2	4.40991	4.33859	1.61e-09	1.85e-08
LINC02159	4.40024	4.9716	4.34e-11	7.03e-10
KCNMB2-AS1	4.34715	6.44454	7.49e-22	1.6e-19
AL158839.1	4.34104	4.39554	4.26e-09	4.48e-08
BX322559.1	4.32711	4.18973	0.000176781	0.00058217
AC023824.5	4.32585	3.88587	7.96e-06	3.66e-05
AC108868.2	4.32564	3.5403	3.76e-07	2.42e-06
LINC02269	4.32122	4.2272	9.68e-06	4.37e-05
AL353581.1	4.27158	3.62884	2.99e-05	0.000118022
AP003469.2	4.26167	4.88629	7.67e-14	2.36e-12
AC010333.2	4.2576	4.23557	6.12e-11	9.57e-10
LINC00488	4.23744	5.9679	3.55e-11	5.88e-10
AL355596.1	4.23725	4.14851	1.39e-07	1e-06
LINC01589	4.2356	5.84138	5.5e-10	7.05e-09
LUCAT1	4.23472	7.35659	1.93e-14	6.66e-13
EGLN3-AS1	4.2276	3.49301	1.25e-08	1.16e-07
AC034213.1	4.22577	5.17517	7.23e-10	9.08e-09
LINC01748	4.21003	4.56711	3.2e-11	5.43e-10
AC005165.1	4.19452	6.29635	3.55e-11	5.88e-10
LINC02587	4.19066	5.43842	5.66e-09	5.79e-08
AC139749.1	4.18027	8.24958	9.77e-11	1.46e-09
LNCAROD	4.16452	3.43504	4.76e-09	4.93e-08
AC022031.2	4.14371	3.78	2.81e-08	2.36e-07
AC016877.3	4.14217	3.67155	1.64e-12	3.95e-11
AL138974.1	4.13424	3.7903	2.63e-09	2.9e-08
PP12613	4.13125	3.54886	1.99e-05	8.26e-05
LINC01508	4.13012	5.18782	2.51e-07	1.69e-06
LINC01901	4.12721	3.73059	3.3e-11	5.57e-10
LINC01511	4.12676	3.74731	3.34e-08	2.78e-07
AL391845.2	4.12321	4.60247	3.08e-31	3.17e-28
ZFPM2-AS1	4.12194	8.10604	2.89e-20	4.35e-18
AC091133.2	4.10564	3.54437	4.79e-06	2.35e-05
AC099552.3	4.10549	3.56249	3.86e-05	0.000148543
AC011294.1	4.09762	6.2953	4.99e-20	6.56e-18
AL365181.2	4.08234	8.30314	4.8e-15	1.92e-13
AP001599.1	4.07588	3.43821	4.39e-06	2.18e-05
OVAAL	4.07485	3.84941	2.3e-07	1.57e-06
LINC01518	4.06957	4.07712	3.92e-06	1.97e-05
AC092598.1	4.06818	4.43238	2.7e-07	1.79e-06
AP000696.1	4.06557	3.53456	4.74e-05	0.000179079
AC005381.1	4.05848	3.99611	2.61e-10	3.57e-09
LINC00836	4.05275	3.64539	0.000260615	0.00082147
LINC01738	4.05126	4.32747	1.12e-07	8.34e-07
AL162582.1	4.05	7.10249	7.34e-09	7.23e-08
LINC01647	4.04911	3.86483	1.14e-06	6.62e-06
LINC02058	4.04303	3.41666	9.47e-08	7.13e-07
FER1L6-AS2	4.03997	3.60721	2.43e-09	2.7e-08
AF254983.1	4.03808	3.51301	1.92e-07	1.34e-06
AC114401.1	4.03501	4.06946	1.47e-13	4.26e-12
AC114316.2	4.03475	4.68383	7e-17	4.16e-15
DLX2-DT	4.03018	3.47891	9.57e-08	7.18e-07
LINC01804	4.02843	3.60496	6.22e-06	2.94e-05
CDKN2A-DT	4.01915	3.6121	1.35e-13	3.95e-12
AL357153.1	4.01491	4.03873	4.53e-08	3.67e-07
AL136084.3	4.01463	4.01498	1.47e-20	2.42e-18
AC063923.2	4.01431	3.53986	0.000509616	0.00147122
LINC01257	4.01416	3.91834	4.36e-07	2.79e-06
AC018814.1	4.01347	3.54882	1.13e-05	4.98e-05
LINC00460	4.00568	4.40451	5.45e-06	2.62e-05
MIR217HG	4.00427	5.11334	1.27e-11	2.44e-10
AC106900.2	3.98844	4.24115	2.45e-11	4.39e-10
LINC01951	3.98436	3.48929	3.33e-05	0.000130484
AC026523.1	3.98417	4.35822	3.68e-06	1.86e-05
AC089983.1	3.98286	3.59974	1.07e-07	7.98e-07
AC125603.2	3.97647	5.96673	7.05e-13	1.84e-11
AL591501.1	3.96598	3.38284	2.75e-07	1.82e-06
AC007639.1	3.95597	5.16292	9.01e-12	1.82e-10
AC008991.2	3.95466	3.37421	1.69e-08	1.52e-07
AL355601.1	3.92734	3.70746	1.5e-09	1.74e-08
LINC01411	3.92474	3.63176	9.8e-06	4.41e-05
AC007402.1	3.92023	3.47799	1.05e-06	6.12e-06
C5orf66-AS1	3.90383	3.45547	6.02e-05	0.00022054
LINC01474	3.88466	8.77554	2.8e-15	1.19e-13
AL583808.1	3.88393	3.58007	4.64e-08	3.75e-07
LINC00351	3.88087	3.37656	6.08e-06	2.89e-05
PLUT	3.8769	5.03944	5.37e-08	4.27e-07
HOXD-AS2	3.87659	4.75189	3.39e-16	1.72e-14
AC007159.1	3.87639	3.5816	0.000169104	0.000561077
LINC02393	3.87024	3.4638	5e-05	0.000187706
AC023090.1	3.86581	4.18504	1.1e-07	8.18e-07
LINC01842	3.86125	3.9084	2.87e-11	4.99e-10
LINC01060	3.86031	4.23756	5.43e-08	4.32e-07
AP005057.1	3.84877	5.13228	4.85e-12	1.06e-10
CU104787.1	3.84321	3.46735	2.88e-06	1.5e-05
AC097515.1	3.8265	4.02514	2.43e-11	4.37e-10
BPESC1	3.82387	3.51539	8.41e-09	8.14e-08
AL121974.1	3.82304	5.43185	1.42e-06	8.05e-06
SAMMSON	3.81856	3.54531	1.48e-08	1.35e-07
AC009271.1	3.81048	3.92977	7.56e-07	4.61e-06
AL356489.1	3.80742	3.33481	0.00013591	0.00046084
AC074135.1	3.80055	4.4155	1.46e-09	1.7e-08
AC022498.1	3.78413	3.32684	6.01e-05	0.000220351
LINC01121	3.77879	4.26114	1.15e-12	2.82e-11
AL365181.3	3.7757	10.3134	2.11e-16	1.12e-14
SNHG27	3.77265	4.01506	1.88e-06	1.02e-05
AC002351.1	3.77223	3.73962	2.7e-07	1.79e-06
AL137026.2	3.75563	3.78882	3.52e-07	2.28e-06
LINC02365	3.75384	7.64757	1.03e-09	1.25e-08
AC084864.1	3.74593	3.54195	3.08e-11	5.26e-10
LINC02158	3.74298	9.08177	4.59e-11	7.4e-10
AC090709.1	3.73997	3.29973	4.49e-10	5.83e-09
AL162726.4	3.73211	3.30434	7.83e-08	6.02e-07
AC024563.1	3.73098	3.69473	6.98e-06	3.26e-05
LINC00689	3.72881	5.94146	7.18e-13	1.86e-11
LINC01448	3.72687	4.00983	2.56e-07	1.72e-06
AC144833.1	3.71925	4.33915	1.04e-06	6.07e-06
LINC02313	3.71707	4.74995	1.14e-13	3.38e-12
AC090578.1	3.70964	4.48701	6.72e-07	4.15e-06
BBOX1-AS1	3.70666	4.53359	3.62e-09	3.87e-08
AC061975.6	3.70666	4.29805	1.8e-05	7.59e-05
LINC02505	3.69409	3.49216	1.11e-05	4.93e-05
AC064853.1	3.69309	4.49121	4.29e-05	0.000163724
LINC00511	3.68983	8.95952	7.21e-19	7.68e-17
AC079062.1	3.68095	7.89938	3.49e-06	1.78e-05
AC092115.3	3.67051	4.39757	3.26e-10	4.39e-09
AL157714.2	3.66508	3.9198	1.55e-06	8.62e-06
LINC02307	3.65739	3.28488	2.23e-07	1.52e-06
AC091133.3	3.65493	4.04998	1.06e-09	1.27e-08
LINC01649	3.64294	3.43478	4.31e-06	2.14e-05
AC083809.1	3.63258	6.49131	4.92e-11	7.89e-10
AL359551.1	3.63185	4.00251	1.53e-06	8.56e-06
AL021940.1	3.62733	5.95866	7.12e-08	5.54e-07
LINC02561	3.62409	5.11039	1.89e-17	1.35e-15
AC010255.1	3.62052	3.71227	2.36e-06	1.26e-05
AC126175.1	3.61794	3.78532	3.76e-06	1.9e-05
AC104088.1	3.60433	3.77747	8.89e-08	6.74e-07
LINC02105	3.59942	3.35225	6.9e-06	3.23e-05
LINC02152	3.59718	3.72318	1.85e-10	2.6e-09
AC122694.1	3.59295	3.55341	1.5e-07	1.08e-06
LINC01666	3.5906	4.35604	4.2e-10	5.48e-09
AC103808.3	3.5869	3.57004	9.25e-09	8.9e-08
LINC01704	3.58173	3.76915	2.02e-20	3.2e-18
LINC01269	3.57094	4.38911	3.38e-09	3.63e-08
AC112493.1	3.56811	4.23081	2.6e-10	3.57e-09
AC113346.1	3.56345	3.33459	1.58e-05	6.74e-05
AL445209.1	3.55978	3.89454	1.44e-07	1.03e-06
LINC01192	3.55028	3.68469	4.83e-07	3.06e-06
LINC01139	3.54591	6.55128	1.21e-09	1.43e-08
LINC02489	3.54382	3.86947	1.74e-06	9.59e-06
LINC02055	3.54354	6.67527	2.89e-10	3.9e-09
LINC00922	3.54235	3.49894	4.51e-06	2.22e-05
LINC01249	3.5356	3.89637	6.08e-05	0.000222297
FIRRE	3.53083	5.22086	2.68e-15	1.15e-13
AC126696.1	3.52277	3.35207	2.78e-05	0.000110556
AC104574.2	3.5196	4.86303	3.59e-07	2.32e-06
LINC00898	3.51706	3.58858	2.07e-07	1.43e-06
AL139130.1	3.51369	4.19173	1.6e-10	2.29e-09
BX322234.2	3.50242	3.52849	2.11e-07	1.46e-06
LINC00635	3.50183	3.64264	1.68e-06	9.29e-06
LINC01793	3.49859	3.99291	1.23e-05	5.37e-05
LINC00229	3.48128	3.39383	0.000167642	0.000557125
LINC01338	3.4761	3.58943	1.97e-05	8.2e-05
AC097512.1	3.47263	4.12801	8.03e-07	4.83e-06
AC006206.2	3.47247	4.86519	2.8e-06	1.46e-05
TEX41	3.4708	7.91553	1.96e-16	1.06e-14
LINC02258	3.46859	3.24159	4.3e-05	0.000163834
AC113404.1	3.46704	5.40291	3.67e-12	8.28e-11
LINC01108	3.46054	5.68269	5.65e-16	2.69e-14
IGF2BP2-AS1	3.45948	4.81558	3.04e-12	6.93e-11
AL138828.1	3.45882	6.63819	5.08e-14	1.62e-12
AC068858.1	3.45613	4.05206	5.36e-16	2.59e-14
LINC01297	3.45445	3.48016	2.24e-07	1.53e-06
AC018558.1	3.44646	3.22943	1.87e-06	1.02e-05
LINC01731	3.4357	3.37338	1.2e-07	8.84e-07
MYHAS	3.43504	3.81886	2.22e-07	1.52e-06
DUXAP8	3.43393	7.51427	7.77e-23	2.09e-20
AL590666.2	3.43095	7.61574	1.69e-17	1.24e-15
AC024581.1	3.42706	3.65311	6.26e-09	6.29e-08
LINC02438	3.42484	4.15536	1.9e-10	2.67e-09
TFAP2A-AS1	3.42372	5.06122	1.04e-12	2.62e-11
LINC01029	3.42228	3.32194	0.000196936	0.000641367
HOXA-AS3	3.42108	3.80465	2.32e-08	1.98e-07
LEF1-AS1	3.41573	4.16819	1.16e-14	4.3e-13
AC239809.3	3.40886	6.3645	5.62e-17	3.47e-15
LINC02469	3.40561	3.22693	2.05e-05	8.49e-05
AC005324.1	3.40543	3.37312	0.000404576	0.00120514
AL606489.1	3.40503	5.579	3.56e-23	9.99e-21
LINC00602	3.40082	3.37163	2.27e-05	9.23e-05
AC104407.1	3.39057	3.36221	0.000517667	0.00149237
AL118511.2	3.38984	4.31744	7.31e-11	1.13e-09
AP000526.1	3.38491	3.36113	1.82e-09	2.07e-08
AL139002.1	3.38241	4.30813	3.35e-08	2.79e-07
AC108868.1	3.37854	3.86694	6.3e-05	0.000229639
AC092691.1	3.37358	4.04528	2.78e-05	0.000110606
LINC02154	3.36728	3.977	4.5e-06	2.22e-05
TLX1NB	3.36257	3.58384	2.56e-09	2.83e-08
LINC01116	3.35016	6.38057	3.01e-17	2.02e-15
AC084782.2	3.33678	3.53897	1.81e-07	1.27e-06
LINC02008	3.33634	3.51081	2.67e-05	0.000106594
AC090774.2	3.33163	3.71572	2.88e-05	0.000114332
LINC01632	3.33112	4.2195	1.63e-05	6.94e-05
AC092490.1	3.32882	7.47233	6.56e-09	6.54e-08
AC093702.1	3.32371	3.28284	4.3e-05	0.000163755
LINC00624	3.32047	7.28004	1.25e-14	4.57e-13
AC109309.1	3.3175	3.40988	0.000114314	0.000393663
LINC02082	3.30784	3.60373	9.21e-07	5.48e-06
LINC02212	3.30637	4.04632	3.48e-05	0.000135721
RMST	3.30117	5.1457	9.99e-11	1.49e-09
LINC01426	3.29407	8.30342	5.84e-17	3.57e-15
GPR1-AS	3.293	4.23053	1.5e-05	6.43e-05
AC109439.2	3.29189	3.54935	4.18e-06	2.08e-05
AC092447.5	3.28621	4.00133	9.39e-07	5.56e-06
ELFN2	3.28151	3.90363	4.8e-10	6.19e-09
AL445647.1	3.2814	3.84349	1.57e-07	1.12e-06
AC008514.1	3.2758	5.03525	1.75e-08	1.56e-07
LINC00856	3.27485	3.96101	5.02e-08	4.03e-07
AC107398.3	3.26478	4.18816	4.06e-08	3.31e-07
LINC-ROR	3.25468	4.11063	2.18e-06	1.18e-05
AC007277.1	3.24406	4.82391	4.41e-12	9.74e-11
AP004147.1	3.24357	3.97865	9.12e-07	5.45e-06
AL591848.2	3.23753	3.80859	2.86e-12	6.6e-11
LINC02109	3.23726	4.29749	9.87e-08	7.4e-07
AL163953.1	3.22921	4.62447	1.14e-11	2.25e-10
AC013451.2	3.2227	3.88062	4.01e-08	3.28e-07
CASC9	3.2226	8.18043	3.33e-07	2.17e-06
AL109615.3	3.2146	7.16484	8.36e-12	1.71e-10
LINC00113	3.2125	3.57057	0.00105798	0.00280884
AC013275.1	3.21224	8.03135	1.03e-15	4.61e-14
AC148476.1	3.21029	5.6113	1.49e-08	1.35e-07
AP000997.2	3.20402	4.20441	7.78e-09	7.57e-08
LINC01681	3.19833	5.26416	9.37e-07	5.55e-06
AL353803.1	3.19675	3.70203	1.45e-05	6.25e-05
CRNDE	3.19395	8.14133	3.36e-26	1.73e-23
LINC00200	3.1835	4.13571	7.74e-05	0.000277935
AL157931.1	3.18084	3.36211	0.000131901	0.000447985
LINC02323	3.17759	4.26906	1.83e-08	1.62e-07
LINC02506	3.16907	7.08434	4.18e-06	2.08e-05
AC007064.2	3.16608	3.52415	5.51e-07	3.46e-06
AL121970.1	3.16219	3.28956	7.04e-06	3.28e-05
AC010789.1	3.15827	3.37143	3.51e-05	0.000136288
LINC01235	3.15792	5.85256	2.86e-14	9.6e-13
Z97192.2	3.14417	6.13377	7e-12	1.48e-10
AC106745.1	3.13412	3.27926	0.00174953	0.00439375
AP003355.2	3.12793	4.16893	1.06e-06	6.2e-06
LINC02202	3.12766	5.1636	3.09e-20	4.45e-18
PLAC4	3.12218	5.54051	5.04e-06	2.45e-05
AL078612.2	3.1132	3.72163	1.13e-06	6.57e-06
LHFPL3-AS1	3.11104	3.59948	7.57e-06	3.5e-05
LINC02515	3.10731	3.29888	0.000569497	0.0016251
LINC01105	3.10663	3.86977	0.000123987	0.000424136
AC022730.4	3.10631	6.67238	1.3e-05	5.68e-05
AL035045.1	3.10314	3.68971	7.3e-06	3.39e-05
AC080037.1	3.10204	4.19228	5.38e-06	2.59e-05
AC138305.1	3.09948	3.28931	0.000344532	0.00104647
CDKN2B-AS1	3.09908	5.88039	3.21e-24	1.04e-21
AC116025.2	3.09661	4.20812	4.17e-17	2.71e-15
AC008109.1	3.08724	6.05169	1.27e-08	1.17e-07
AC008443.2	3.07789	3.39597	1.53e-06	8.54e-06
AL133370.1	3.06864	3.77489	5.42e-07	3.41e-06
AC147651.1	3.06051	6.09173	3.68e-06	1.86e-05
AC027312.1	3.05408	3.40996	0.000513039	0.00147972
AL391056.1	3.05324	6.13643	3.89e-11	6.36e-10
LINC01535	3.05117	5.05963	6.95e-14	2.16e-12
AC010457.1	3.04838	4.32382	4.02e-06	2.01e-05
AP005230.1	3.04812	3.62882	6.08e-09	6.15e-08
AC007099.1	3.04481	4.74673	1.53e-07	1.09e-06
FAM87A	3.04197	4.61249	6.89e-08	5.37e-07
LINC01117	3.04158	3.82668	4.47e-09	4.67e-08
AC023347.1	3.03846	3.75302	5.43e-06	2.61e-05
AC145207.8	3.02612	5.20274	2e-11	3.63e-10
DEPDC1-AS1	3.02541	3.30991	5.57e-08	4.42e-07
AC000067.1	3.01789	3.41118	5.27e-13	1.4e-11
SLC7A11-AS1	3.01506	3.81332	8.84e-08	6.72e-07
AC092336.1	3.01506	3.37124	0.00135952	0.00350603
AC006946.2	3.01225	3.94118	3.07e-07	2.01e-06
C3orf67-AS1	3.00796	4.01068	7.13e-12	1.49e-10
AC011899.1	3.00232	3.78325	0.00104557	0.00278298
AL023803.2	2.99546	5.24008	3.09e-20	4.45e-18
AC025265.3	2.9937	3.36357	2.32e-07	1.57e-06
LINC01854	2.9788	3.29738	7.39e-05	0.000265818
LINC02003	2.97576	3.30457	1.47e-05	6.31e-05
AL110292.1	2.97437	3.39116	5.83e-06	2.79e-05
LINC01460	2.97034	3.73397	4.04e-06	2.02e-05
AP005205.2	2.96929	3.55576	7.59e-06	3.51e-05
AP000695.2	2.96871	5.75843	1.8e-11	3.33e-10
LINC00114	2.95295	4.28135	4.14e-08	3.37e-07
AC010931.2	2.94946	3.87144	5.25e-08	4.19e-07
PKIA-AS1	2.9447	3.53427	2.37e-06	1.26e-05
LINC02568	2.93502	3.90152	1.3e-06	7.42e-06
AC100872.1	2.91243	4.12777	4.63e-10	5.99e-09
AC087277.1	2.90643	3.23612	0.00125433	0.00326283
HOXC-AS2	2.89693	3.65453	2.38e-07	1.61e-06
LINC00668	2.88669	5.18415	5.07e-05	0.000190131
AC009292.1	2.88659	3.54422	1.06e-06	6.2e-06
AL445228.2	2.88211	4.19804	4.14e-15	1.7e-13
AC022098.2	2.88105	3.89207	1.97e-06	1.07e-05
AC099792.1	2.87854	3.96516	7.17e-06	3.33e-05
AL451069.1	2.8775	4.8352	4.99e-08	4.02e-07
AC027013.1	2.87084	3.56507	1.54e-05	6.58e-05
LINC02253	2.86682	3.79919	5.24e-06	2.53e-05
LINC00239	2.86059	6.2341	1.23e-08	1.14e-07
AP001178.3	2.85126	3.81752	2.58e-12	5.98e-11
TCL6	2.85065	5.33289	1.48e-09	1.72e-08
MIR202HG	2.84333	3.46215	0.000378495	0.00113766
AP000757.2	2.84283	5.04102	4.43e-06	2.19e-05
UPK1A-AS1	2.83648	4.55672	1.24e-06	7.11e-06
AC040174.2	2.83271	3.42574	0.000457975	0.00134604
AL356234.2	2.83104	5.14239	6.55e-08	5.14e-07
AC104823.1	2.82581	3.4117	0.0013817	0.00355674
LINC01594	2.81895	3.31338	0.000262487	0.000826105
LINC00628	2.81291	4.30857	6.27e-13	1.65e-11
AL713998.1	2.80958	3.57971	0.000699047	0.00194712
LINC01777	2.80505	3.37261	0.000206421	0.000667682
AC079467.1	2.7979	3.64959	0.00303088	0.00715231
AC068756.1	2.79353	4.0707	7.43e-05	0.000267127
MAFG-DT	2.79313	7.83514	1.91e-25	7.86e-23
C17orf82	2.78906	5.8889	1.21e-22	3.12e-20
LINC00160	2.78624	3.43076	5.11e-05	0.000191077
LINC01186	2.77947	5.73168	5.91e-13	1.57e-11
AC237221.1	2.77526	7.79229	9.28e-09	8.92e-08
LINC01775	2.77384	3.43188	1.02e-11	2.05e-10
Z93403.1	2.77324	3.41561	1.42e-05	6.13e-05
LINC01579	2.76877	3.99964	3.56e-05	0.000138252
FLJ12825	2.76552	4.45012	6.44e-09	6.44e-08
AC104134.1	2.76329	3.9955	2.52e-06	1.33e-05
ELFN1-AS1	2.76207	5.72769	1.87e-08	1.66e-07
AL359636.2	2.75885	3.39248	2.81e-07	1.85e-06
MIR325HG	2.75868	5.6284	1.63e-10	2.32e-09
AC022034.1	2.75193	6.44645	4.28e-10	5.58e-09
LINC02595	2.74818	3.34506	1.38e-08	1.27e-07
AC105411.1	2.74604	6.39809	1.45e-10	2.1e-09
AC092171.2	2.74493	9.93062	3.42e-32	4.23e-29
AC092343.1	2.74254	3.29335	0.000138294	0.000468411
AP005271.1	2.74078	3.40732	5.74e-05	0.000212724
LINC00665	2.7366	9.66585	3.44e-20	4.73e-18
AL163952.1	2.73442	4.37525	1.12e-06	6.51e-06
ZBTB46-AS1	2.73344	3.31721	0.000357516	0.00108057
LINC00272	2.72916	3.58588	8.98e-05	0.000317291
AC010624.2	2.72502	3.49806	5.3e-06	2.56e-05
PGM5P3-AS1	2.72185	3.68356	9.18e-07	5.46e-06
MIR9-3HG	2.71447	7.38902	1.81e-10	2.56e-09
LINC01143	2.70365	3.34574	0.000111419	0.000384336
AC020934.1	2.7031	3.37574	5.89e-07	3.69e-06
AP000525.1	2.70279	4.51892	4.38e-10	5.7e-09
LINC00632	2.7017	4.38752	4.36e-05	0.000165944
STAU2-AS1	2.69433	4.80498	1e-15	4.51e-14
AL033381.1	2.68877	3.70422	5.03e-06	2.45e-05
AC104041.1	2.68461	3.73408	4.8e-06	2.35e-05
DPP10-AS1	2.68346	6.33477	2.49e-05	0.000100607
AC023301.1	2.68315	3.52135	4.11e-06	2.05e-05
AC092590.1	2.68121	3.35328	0.000398392	0.00119017
SRGAP3-AS4	2.67771	3.43043	0.000102845	0.000358362
LINC01967	2.67687	3.25759	3.29e-05	0.000128721
AC109927.1	2.67458	4.01795	0.0001111	0.00038345
TTC39A-AS1	2.67418	4.67165	4.88e-09	5.03e-08
PTGES2-AS1	2.67399	4.14151	1.1e-13	3.29e-12
MIR3150BHG	2.67305	3.67035	4.68e-07	2.97e-06
TRPC7-AS1	2.66946	3.33208	4.88e-06	2.39e-05
AL450322.2	2.66691	3.62677	2.96e-06	1.53e-05
LINC00880	2.66534	6.05766	1.96e-11	3.57e-10
GRM5-AS1	2.66331	3.31815	0.000108755	0.000375986
AC104534.1	2.66023	6.14835	6.91e-11	1.07e-09
LINC00452	2.65972	3.42782	0.000205193	0.000664751
AC097478.1	2.65779	5.03443	2.69e-06	1.41e-05
AL109976.1	2.65539	5.4298	3.07e-11	5.26e-10
AL033381.2	2.65118	3.66141	2.96e-05	0.0001172
AL033384.1	2.65023	4.85227	8.04e-09	7.81e-08
AC133644.2	2.64902	4.91274	3.76e-08	3.09e-07
AC113383.1	2.64843	3.57652	1.83e-09	2.08e-08
RNF157-AS1	2.64736	6.22698	1.43e-10	2.08e-09
LINC01510	2.64413	4.58893	3.55e-06	1.81e-05
LINC02181	2.63267	3.66349	7.37e-05	0.000265349
MIR4300HG	2.62357	3.37764	0.000564979	0.00161396
LINC00944	2.62074	6.2042	7.79e-10	9.69e-09
AL590705.2	2.6179	3.26247	0.00055761	0.00159487
AC018553.1	2.61604	6.42942	1.21e-09	1.43e-08
LINC01136	2.60817	4.99311	1.96e-11	3.57e-10
LINC01483	2.60634	3.61236	5.47e-05	0.000203358
AL049830.3	2.60395	3.99736	7.59e-07	4.62e-06
AL160162.1	2.60015	3.41531	0.0013253	0.00342725
AC079760.2	2.59725	3.97722	2.64e-07	1.76e-06
AL358075.2	2.58885	3.96274	6.74e-12	1.43e-10
FZD10-DT	2.58744	5.75777	5.23e-11	8.29e-10
AC011676.1	2.58038	3.43384	2.55e-06	1.35e-05
LINC01479	2.57643	3.32766	0.000746602	0.00207118
IL21-AS1	2.57236	4.38581	0.00037212	0.0011209
LINC01675	2.57053	4.2073	9.98e-09	9.53e-08
AL035446.1	2.56643	6.25295	8.25e-10	1.02e-08
TMEM78	2.562	3.33101	6.88e-06	3.22e-05
CAMTA1-IT1	2.55854	3.47296	0.000441758	0.00130458
AL121906.2	2.55841	5.50146	5.71e-20	7.35e-18
LINC02244	2.5542	4.18026	5.15e-05	0.000192592
AC008659.1	2.55085	3.78557	0.000135482	0.000459643
AC079380.1	2.54723	3.45944	2.41e-06	1.28e-05
LINC01204	2.54709	3.38941	0.000407827	0.00121249
AC099850.3	2.54699	5.86504	6.33e-17	3.83e-15
AC112236.1	2.54511	3.90115	0.000205056	0.000664658
AL513318.2	2.54492	4.63597	1.42e-06	8.04e-06
AL391832.1	2.54292	5.22198	4.29e-09	4.51e-08
AC010615.2	2.54276	6.05983	2.55e-12	5.92e-11
LINC00853	2.54199	7.32422	6.11e-20	7.7e-18
AC092969.1	2.54121	3.43509	0.000264167	0.000830241
C10orf91	2.53836	4.25131	1.54e-06	8.6e-06
AC007036.1	2.53791	3.7673	2.67e-07	1.78e-06
AC048383.1	2.53622	3.38353	1.92e-05	8.01e-05
LINC00607	2.53491	7.11077	1.13e-11	2.22e-10
CASC22	2.53393	4.09767	1.7e-05	7.21e-05
RASGRF2-AS1	2.52993	3.40057	7.28e-11	1.12e-09
LINC00519	2.52077	3.43333	2.61e-07	1.74e-06
AP000553.2	2.51452	3.83741	8.38e-12	1.71e-10
LINC01694	2.51268	5.72935	6.44e-10	8.13e-09
HCG20	2.51173	5.11228	4.86e-09	5.01e-08
AL139412.1	2.51114	6.06837	4.74e-16	2.32e-14
LINC00501	2.51028	3.8113	3.17e-06	1.63e-05
AL513217.1	2.49578	3.82418	7.82e-08	6.02e-07
C1QTNF1-AS1	2.49109	5.97446	1.78e-08	1.58e-07
AC012236.1	2.48792	7.36158	3.04e-12	6.93e-11
SPATA3-AS1	2.48388	4.18177	5.18e-09	5.33e-08
AC124067.4	2.48278	6.07473	9.32e-07	5.54e-06
GAPLINC	2.48077	6.10565	4.94e-12	1.08e-10
AC040173.1	2.47797	4.20488	6e-06	2.85e-05
LINC02188	2.47645	5.07132	6.12e-08	4.84e-07
AC021491.2	2.47055	3.43972	8.54e-09	8.26e-08
NCAM1-AS1	2.46998	4.35326	4.36e-07	2.79e-06
AC131532.1	2.46221	3.96177	9.12e-05	0.000321927
AC040970.1	2.45869	6.22238	5.1e-10	6.55e-09
AL359636.1	2.45128	3.64941	9.11e-06	4.13e-05
AC096708.3	2.44899	3.36549	0.00015157	0.000508636
INKA2-AS1	2.44359	3.99207	2.24e-08	1.94e-07
AC114811.2	2.44221	4.16608	1.53e-06	8.57e-06
AC022028.2	2.4385	3.6154	0.00146226	0.00373762
AL353803.2	2.43592	3.7811	3.46e-05	0.000134905
AL451069.3	2.43444	3.69985	1.91e-06	1.04e-05
RNF144A-AS1	2.43382	5.43549	1.62e-09	1.86e-08
AC108136.1	2.42653	4.78749	8.7e-08	6.62e-07
LINC02384	2.42558	8.91528	7.61e-09	7.44e-08
LINC02228	2.42372	3.92859	2.04e-05	8.43e-05
LINC02389	2.42256	3.34489	0.000187553	0.000614369
AC006305.1	2.42125	4.73086	1.59e-05	6.76e-05
AC005730.2	2.41787	4.06023	1.78e-05	7.52e-05
LINC02125	2.41099	3.46012	0.000287181	0.000889772
AC009264.1	2.41082	3.54378	0.000696304	0.00194211
LINC00664	2.40673	4.52568	1.2e-09	1.42e-08
ATP2A1-AS1	2.40261	5.17821	1.38e-14	4.98e-13
AL109914.1	2.39942	3.75742	0.000329022	0.00100479
AC025176.1	2.39686	3.53268	2.94e-08	2.47e-07
SLC12A5-AS1	2.39637	5.48458	1.25e-09	1.47e-08
LINC01358	2.39565	4.4062	2.77e-05	0.000110556
AC012625.1	2.39544	3.35747	4.57e-05	0.00017354
AC093151.2	2.3954	3.66984	8.58e-05	0.000305114
AL358334.2	2.39309	5.37283	2.25e-05	9.19e-05
AL133367.1	2.38543	6.57944	8.75e-20	1.08e-17
TESC-AS1	2.38493	4.96155	5.03e-06	2.45e-05
LINC00941	2.38323	5.17826	3.77e-09	4.01e-08
DDX11-AS1	2.38052	5.30711	2.07e-30	1.82e-27
PRR7-AS1	2.37863	4.34558	1.57e-13	4.52e-12
AL590644.1	2.37654	3.80079	0.00147117	0.00375729
AC027627.1	2.37352	4.05165	0.000456556	0.00134378
AL512652.1	2.36622	3.52428	1.83e-11	3.37e-10
AL162431.2	2.3567	6.31266	3.37e-20	4.73e-18
LINC02041	2.35501	4.5009	2.27e-06	1.22e-05
KIAA1614-AS1	2.35492	4.07564	2.84e-10	3.84e-09
AC106795.3	2.35041	4.00377	0.000768876	0.00212153
AC022092.1	2.35032	3.53515	6.55e-05	0.000238291
AC010643.1	2.34761	7.42335	2.49e-10	3.44e-09
AC008554.1	2.34598	4.39607	3e-07	1.97e-06
CCDC144NL-AS1	2.34504	8.12215	7.84e-11	1.2e-09
AL356215.1	2.34402	3.98745	5.86e-06	2.8e-05
AC078909.2	2.34297	3.86193	1.09e-08	1.03e-07
AL160408.1	2.34203	4.64906	5.14e-06	2.49e-05
HRAT92	2.34052	6.17895	6.42e-16	3.01e-14
AC010735.1	2.3363	3.74922	9.48e-08	7.13e-07
AC245100.1	2.333	3.61006	1.05e-08	9.9e-08
AC019183.1	2.32796	3.63147	8.54e-05	0.000304092
LINC02600	2.32521	5.81185	3.76e-08	3.09e-07
LINC01451	2.324	7.70108	2.71e-14	9.19e-13
AC128707.1	2.32349	4.63916	3.13e-05	0.000123109
U95743.1	2.32307	3.33412	0.000206683	0.000668178
PURPL	2.3212	7.30839	3.79e-10	4.97e-09
NRG1-IT1	2.32038	3.32251	0.000112471	0.000387748
AC100826.1	2.31985	4.89486	1.51e-07	1.08e-06
AF123462.1	2.31807	3.33941	0.00101805	0.00272391
MYCNOS	2.31532	4.09795	5.72e-06	2.74e-05
MNX1-AS2	2.31271	3.50971	0.000583006	0.00165906
AC132807.2	2.31157	4.07272	0.000169675	0.000562368
AC007743.1	2.30817	5.30789	1.42e-10	2.06e-09
LINC01615	2.30421	4.12357	2.5e-09	2.76e-08
WASIR2	2.30296	3.71685	1.55e-06	8.62e-06
AC126323.6	2.29542	3.64876	0.000197551	0.000642691
LINC00189	2.29495	6.28805	1.28e-08	1.19e-07
AC020928.1	2.28949	4.31874	5.06e-08	4.06e-07
AC106820.5	2.2844	4.54061	1.71e-11	3.2e-10
LINC01754	2.28353	4.7431	2.38e-06	1.26e-05
AL137060.1	2.28301	4.49121	9.43e-19	9.48e-17
AC009275.1	2.28066	6.36214	2.86e-11	4.98e-10
AL136379.1	2.27658	3.40033	4.06e-06	2.03e-05
LINC01151	2.27126	7.43506	7.36e-10	9.19e-09
SLC25A34-AS1	2.26987	3.73297	2.67e-06	1.4e-05
AC005537.1	2.2635	4.09488	5.09e-05	0.000190839
CERNA1	2.2594	6.7302	3.51e-11	5.86e-10
LINC01549	2.25785	6.23793	5.97e-09	6.08e-08
LINC02585	2.25467	4.6491	2.81e-16	1.46e-14
DGCR9	2.25225	5.89618	2.18e-09	2.44e-08
AC107959.3	2.24937	5.61885	6.15e-11	9.6e-10
AC096711.1	2.24818	3.65742	1.77e-05	7.49e-05
AC004477.1	2.24597	5.583	5.73e-27	3.54e-24
AC040174.1	2.24259	3.76177	0.000218446	0.000700682
AC008033.3	2.24227	5.53588	7.79e-07	4.72e-06
DLG5-AS1	2.24083	6.10223	8.35e-19	8.75e-17
AC007952.2	2.2408	4.38727	0.000534314	0.0015332
AL033527.3	2.23804	3.64134	1.01e-06	5.94e-06
AC073655.1	2.23778	3.48354	3.24e-06	1.67e-05
AC111149.2	2.23713	6.45537	1.17e-05	5.13e-05
AC002546.1	2.23583	3.67856	0.000151394	0.000508321
AC010719.1	2.22495	6.63784	4.57e-17	2.88e-15
SLC14A2-AS1	2.22351	3.35839	8.31e-05	0.000296724
AC226118.1	2.22274	3.70094	1.1e-05	4.87e-05
AC126773.2	2.22093	3.49362	5.7e-05	0.000211135
AC005550.2	2.21776	7.57341	0.000402326	0.00120018
AL627309.1	2.21114	3.71059	0.000284835	0.000883833
LINC01747	2.20815	3.51592	4.57e-09	4.76e-08
AL670729.1	2.20687	3.67978	1.37e-07	9.88e-07
AL138960.1	2.20553	3.35973	0.000281653	0.000876601
AC132872.2	2.20464	4.28317	8.59e-17	5e-15
AL445483.1	2.20277	5.1423	1.04e-08	9.89e-08
LINC00163	2.19309	3.63628	0.00389679	0.00888854
AC023906.5	2.18589	5.67865	2.26e-07	1.54e-06
AC111000.4	2.18262	7.94802	4.34e-18	3.83e-16
AC007848.1	2.1825	3.42495	0.00130134	0.00337376
LINC01970	2.17461	4.29873	4.17e-13	1.13e-11
AC002398.2	2.17406	5.79222	6.37e-05	0.000232265
Z82246.1	2.17372	6.05786	1.03e-06	6.02e-06
AC027348.1	2.16899	3.59308	0.000286982	0.000889602
AC068987.1	2.16879	4.43426	1.08e-12	2.68e-11
AC013553.3	2.16868	3.69682	1.44e-11	2.71e-10
AP003174.1	2.16408	4.88038	7.66e-08	5.92e-07
EGFR-AS1	2.16389	7.65239	1.04e-05	4.65e-05
AC016590.1	2.16319	3.88005	1.84e-06	1.01e-05
AC011005.4	2.15572	4.41037	7.87e-10	9.75e-09
AP003555.1	2.15436	3.74755	0.00211452	0.00517572
AL139246.4	2.14708	3.61247	0.000937909	0.00253473
AC006252.1	2.14534	4.61375	4.63e-14	1.5e-12
AL136528.1	2.14506	4.73626	1.93e-05	8.05e-05
RFPL1S	2.14015	6.44265	3.17e-08	2.65e-07
FALEC	2.14013	4.09743	1.05e-10	1.57e-09
AC022296.3	2.1353	3.44062	7.36e-07	4.5e-06
AC007923.4	2.13133	3.4233	0.0015724	0.00399766
AL451074.2	2.13108	5.30708	9.46e-19	9.48e-17
AC004253.2	2.13039	3.37201	3.98e-05	0.000152851
LINC00504	2.12442	6.92637	1.5e-10	2.17e-09
AL354719.2	2.12176	8.01324	8.61e-08	6.57e-07
AC141002.1	2.11989	4.06364	7.18e-12	1.5e-10
AC004540.1	2.11792	6.84607	8.57e-08	6.54e-07
AL118505.1	2.11759	4.54728	5.9e-07	3.69e-06
PVT1	2.11446	8.73524	1.1e-18	1.08e-16
AC008750.3	2.11154	3.74791	3.82e-07	2.46e-06
AL121899.1	2.11134	6.92823	6.45e-15	2.55e-13
UCA1	2.11083	9.56637	0.000457245	0.00134517
LINC01762	2.10847	4.4948	1.16e-09	1.38e-08
AC074194.1	2.10681	3.29784	0.00105187	0.00279623
LINC00858	2.10591	3.30793	0.00196486	0.00485883
AL359881.1	2.10392	3.5745	0.000160911	0.000537646
AC244517.1	2.10004	4.33235	4.63e-06	2.28e-05
LINC01977	2.09698	4.52757	7.29e-07	4.46e-06
OVOL1-AS1	2.0969	5.36945	0.000443824	0.00130943
AC096637.2	2.09138	3.45686	4.33e-07	2.77e-06
AC110285.6	2.084	4.10688	3.36e-09	3.62e-08
AL049870.2	2.07998	3.40604	0.0036536	0.00841294
AL355482.1	2.07824	6.78168	6.78e-09	6.74e-08
AC120498.10	2.07486	4.62182	2.63e-05	0.000105196
AC006460.1	2.07485	3.96068	8.18e-06	3.75e-05
AP001596.1	2.0712	3.72373	3.09e-05	0.00012166
PGM5P4-AS1	2.07039	3.38964	0.000868578	0.00236495
Z93930.3	2.0702	5.63061	1.71e-08	1.53e-07
AC026740.1	2.06884	6.25629	6.86e-14	2.14e-12
AC017002.3	2.06776	4.06286	2.65e-09	2.9e-08
AC078860.1	2.06769	3.32847	0.000383859	0.00115176
AC096711.3	2.06596	4.33946	2.89e-05	0.000114654
LINC01703	2.06478	6.21374	6.95e-17	4.16e-15
AC034229.4	2.0608	3.89803	1.97e-10	2.77e-09
TSPEAR-AS2	2.05768	7.46719	9.16e-09	8.83e-08
LINC01374	2.0518	3.60812	0.000143517	0.000484244
AP000997.1	2.0485	3.69495	7.68e-06	3.55e-05
AC104590.1	2.04383	3.83778	3.8e-09	4.04e-08
LINC00567	2.04163	3.46664	0.000667903	0.00187134
AC027130.1	2.04154	3.79861	0.00110899	0.00292417
KRTAP5-AS1	2.03972	5.75115	3.01e-08	2.52e-07
PARAL1	2.0397	3.57097	0.000140121	0.000474077
AL391244.2	2.03605	4.36119	1.34e-08	1.24e-07
SNHG4	2.03447	6.09712	4.27e-15	1.74e-13
AC092159.2	2.03241	4.112	7.03e-06	3.28e-05
AL033380.1	2.02858	3.64038	2.37e-05	9.6e-05
CASC8	2.02787	3.87492	1.17e-05	5.14e-05
LINC00173	2.02739	4.52945	5.79e-08	4.58e-07
AC092757.3	2.02648	4.04305	9.3e-09	8.92e-08
FOXD2-AS1	2.02574	8.45248	2.24e-18	2.1e-16
MAPT-IT1	2.02312	3.84072	1.12e-05	4.93e-05
C1orf140	2.02051	6.08764	1.18e-05	5.18e-05
SATB2-AS1	2.02001	5.20934	6.33e-08	4.99e-07
GDNF-AS1	2.01676	5.99203	1.05e-05	4.68e-05
ROR1-AS1	2.0144	3.58306	0.000756798	0.00209485
AC110741.1	2.0132	4.32475	0.00102033	0.00272757
AC119150.1	2.01272	5.3135	8.44e-06	3.86e-05
AC110285.1	2.01216	4.26825	6.13e-08	4.84e-07
CHRM3-AS1	2.01196	4.24272	0.00275893	0.00656321
LINC00485	2.01194	3.52084	1.23e-06	7.1e-06
AC024601.1	2.01176	3.43107	0.000767012	0.0021181
AC009121.2	2.00881	4.19331	2.16e-08	1.88e-07
AC131097.1	2.00205	4.54525	0.000230728	0.000735597
AC073352.1	1.99811	3.75279	9.53e-09	9.12e-08
AC005670.1	1.99641	3.41837	1.81e-07	1.27e-06
AC024901.1	1.99512	4.27362	0.000983827	0.00264035
LINC02137	1.99409	3.60211	0.00261106	0.00623304
AL359878.1	1.99317	4.30366	3.28e-13	8.96e-12
LINC00346	1.99199	8.2788	6.29e-12	1.34e-10
AL080312.2	1.99193	3.36165	0.000988697	0.00265227
AL121757.1	1.9847	3.6147	0.000573677	0.00163552
BLACAT1	1.9832	3.80691	0.000282965	0.000879355
AC021683.1	1.97838	3.99596	0.000133354	0.000452669
AC011921.1	1.97703	4.09419	8.82e-11	1.33e-09
AL445524.1	1.97493	10.2066	2.28e-20	3.52e-18
AC109361.2	1.97444	3.43445	0.0010735	0.00284393
AC078880.3	1.97304	3.85883	0.000470716	0.00137693
BHLHE40-AS1	1.97297	7.01011	2.03e-11	3.68e-10
AP000569.1	1.97059	3.48901	2.04e-05	8.43e-05
AC016708.1	1.96792	4.51371	3e-07	1.97e-06
HHATL-AS1	1.96711	4.02452	8.56e-06	3.91e-05
AL024498.1	1.9667	4.30945	1.73e-12	4.14e-11
LINC02204	1.96428	3.72125	1.89e-05	7.9e-05
AC006557.1	1.96364	3.3242	2.85e-06	1.49e-05
AL021392.1	1.95345	4.95193	4.55e-09	4.75e-08
AC138819.1	1.95111	3.68799	0.000498402	0.00144492
AL353801.1	1.94934	3.43288	1.39e-06	7.92e-06
AC078850.1	1.94843	3.70115	7.72e-06	3.56e-05
AC023794.1	1.94572	3.68362	0.00108551	0.00287083
LINC02298	1.94165	6.5967	7.41e-08	5.74e-07
IGF2-AS	1.93817	7.43964	0.000107882	0.000373179
AC010266.2	1.93803	3.39598	0.00157497	0.00400253
AC007406.2	1.93698	5.70436	2.74e-07	1.81e-06
COLCA1	1.93563	8.33339	3.79e-11	6.22e-10
LINC01133	1.9356	5.05964	0.000573599	0.00163552
MSC-AS1	1.93559	9.28448	1.94e-09	2.19e-08
AC006483.2	1.93058	3.60331	1.99e-05	8.25e-05
AC015660.2	1.92893	3.64628	0.00171988	0.00432454
BNC2-AS1	1.92801	3.6135	0.000374631	0.00112736
AC023154.1	1.92703	4.96427	0.000215498	0.000693328
UBXN10-AS1	1.9249	5.52499	3.32e-07	2.16e-06
AL353708.3	1.92344	5.04491	3.64e-16	1.83e-14
PSORS1C3	1.92267	5.85737	1.27e-07	9.28e-07
LNCOC1	1.92247	5.75653	5.76e-12	1.23e-10
AL021807.1	1.92214	5.07033	2.34e-08	1.99e-07
C2orf48	1.92168	4.82967	2.42e-09	2.69e-08
AC006012.1	1.91964	3.38552	2.05e-05	8.48e-05
AC092171.4	1.9195	4.67334	2.33e-13	6.54e-12
AP003390.1	1.91949	3.94469	1.1e-07	8.16e-07
AC026992.2	1.91844	4.21626	1.13e-05	4.98e-05
LINC01556	1.91685	4.12178	2.22e-05	9.08e-05
AC073111.1	1.91646	3.39583	3.72e-06	1.88e-05
LINC01619	1.91236	6.58538	2.61e-07	1.74e-06
AL450992.2	1.91187	8.30073	1.37e-21	2.65e-19
AC073569.1	1.90761	3.37335	0.00180748	0.00451724
UNC5B-AS1	1.90743	3.64149	1.61e-05	6.84e-05
AC005618.1	1.9058	4.83837	2.28e-08	1.95e-07
LINC01088	1.90496	4.28983	2.28e-05	9.27e-05
AC087627.1	1.90409	3.47548	5.1e-06	2.47e-05
Z97200.1	1.90287	3.5143	0.000848238	0.00231672
AC010247.2	1.9002	6.42949	2.21e-07	1.51e-06
ELDR	1.89855	3.3379	1.18e-05	5.19e-05
LINC00887	1.89655	5.61108	2.02e-07	1.4e-06
AL590652.1	1.89645	3.87781	6.25e-07	3.89e-06
CCDC13-AS1	1.89365	5.53855	8.13e-07	4.88e-06
AC012617.1	1.8927	4.06567	3.27e-07	2.13e-06
AC011445.2	1.88965	5.2314	2.16e-10	3.02e-09
AC090152.1	1.88738	7.92023	1.17e-05	5.12e-05
AC117402.1	1.88448	5.29018	9.16e-07	5.46e-06
AC022148.1	1.88041	3.65579	0.000192778	0.000629138
NAV2-AS3	1.87973	3.40295	0.000389314	0.00116566
AP002991.1	1.87773	3.44225	0.000521456	0.00150189
IBA57-DT	1.87722	3.9778	1.05e-09	1.26e-08
LINC02421	1.875	3.45908	3.25e-05	0.000127421
AC092667.1	1.8733	4.78347	4.11e-09	4.34e-08
AL513327.3	1.8725	3.38028	6.38e-06	3e-05
AL355102.4	1.87152	7.24861	1.31e-07	9.49e-07
AC009005.1	1.87074	6.67088	4.48e-18	3.84e-16
AC092757.2	1.86978	4.24903	8.5e-07	5.09e-06
HCG22	1.86812	3.5599	0.000472064	0.00138022
AC004816.1	1.8675	6.05784	1.02e-16	5.91e-15
PRKG1-AS1	1.85721	3.46577	0.00177422	0.00444852
LINC01182	1.85313	5.86797	5.35e-05	0.000199339
SERTAD4-AS1	1.84706	5.20547	3.57e-09	3.82e-08
LINC02562	1.84602	4.07757	0.00270802	0.00645205
LINC02211	1.84509	3.91405	9.52e-05	0.000334573
AC239585.2	1.84193	3.39109	0.00180288	0.00451122
AC105219.3	1.83945	3.87024	1.74e-05	7.36e-05
AP003064.2	1.83843	3.89556	9.95e-05	0.000348325
AC073283.2	1.83791	5.18149	4.08e-05	0.000155971
AC020907.1	1.83713	6.58692	5.78e-10	7.38e-09
AC021092.1	1.83658	4.18176	1.28e-07	9.32e-07
LY86-AS1	1.83494	4.75641	0.000102393	0.000357189
LINC00336	1.83333	3.35851	0.00165859	0.00418749
CTB-178M22.2	1.83333	4.27696	1.12e-06	6.51e-06
AL162293.1	1.83139	5.44067	6.52e-05	0.000237327
AC102953.2	1.83118	7.0483	1.26e-17	9.76e-16
LINC01087	1.82912	3.82557	0.00260988	0.00623304
LINC00896	1.82854	6.8843	5.17e-08	4.13e-07
AC126696.3	1.82616	3.40678	0.000187523	0.000614369
AC134682.1	1.82495	5.10706	7.37e-08	5.72e-07
AC107926.1	1.82392	3.31704	0.00076318	0.00210959
U47924.3	1.82389	3.78918	1.73e-07	1.22e-06
AC068987.4	1.82342	8.33453	6.72e-10	8.47e-09
AP001972.4	1.82177	3.44389	0.00122338	0.00319175
AC091057.1	1.81895	7.31977	2.38e-16	1.24e-14
LINC00839	1.81799	6.2304	8.37e-08	6.41e-07
AC239803.3	1.81787	4.03209	2.4e-07	1.62e-06
ZNF252P-AS1	1.81625	5.15393	8.19e-13	2.11e-11
U73166.1	1.81442	5.51384	3.18e-13	8.78e-12
MYLK-AS1	1.8101	5.9011	1.8e-23	5.56e-21
AL356310.1	1.80965	3.831	0.000233232	0.000742736
AC092112.1	1.80731	4.03485	0.000123231	0.000421786
AL445673.1	1.80536	4.32382	1.59e-05	6.78e-05
CYP4A22-AS1	1.8049	4.19041	1.1e-09	1.31e-08
AL133215.2	1.80407	4.07348	5.04e-11	8.02e-10
AC006205.2	1.80128	8.24233	2.21e-05	9.06e-05
AC108751.4	1.80117	5.61881	3.19e-10	4.31e-09
AC109322.1	1.80037	7.47566	3.07e-21	5.58e-19
LINC00484	1.80023	4.03256	0.000146176	0.000492408
AL138720.1	1.79425	3.44357	0.000531699	0.00152641
AP000808.1	1.79242	8.51638	2.95e-05	0.000117004
MIR4435-2HG	1.79198	10.7586	1.18e-14	4.34e-13
AL451050.2	1.79128	4.4858	8.65e-15	3.28e-13
SMILR	1.78812	4.63443	1.15e-05	5.08e-05
AC005332.1	1.78327	4.18541	2.43e-10	3.37e-09
LINC01605	1.77951	3.6246	0.000481016	0.00140374
TMCC1-AS1	1.77915	7.21386	3.71e-17	2.44e-15
AL358473.1	1.77866	3.31184	0.00125519	0.00326371
AC018682.2	1.77795	3.30282	0.00288861	0.00685384
AC068506.1	1.77714	5.65766	7.12e-05	0.000257341
LINC02185	1.77604	3.99412	1.48e-06	8.31e-06
AC099518.2	1.77566	3.51686	7.83e-07	4.74e-06
GRIK1-AS1	1.77488	4.05057	0.000207505	0.000670484
AP001469.3	1.77438	6.49632	1.88e-16	1.04e-14
DNM1P35	1.77217	5.8179	2.21e-13	6.26e-12
AC009148.1	1.76707	4.12503	6.3e-09	6.31e-08
HCG25	1.76172	6.07289	1.15e-21	2.36e-19
AC011445.1	1.7616	4.16263	9.32e-06	4.23e-05
AC120498.9	1.75913	3.75329	6.88e-09	6.81e-08
LINC00322	1.75894	3.38125	0.00037857	0.00113766
LINC01659	1.75706	4.03519	0.00111284	0.00293182
PP7080	1.7569	10.6333	1.08e-12	2.68e-11
AC091057.4	1.75641	4.06551	1.1e-07	8.18e-07
DDN-AS1	1.75514	4.48388	2.3e-08	1.96e-07
DGCR10	1.75487	3.67443	0.000244738	0.000776575
LINC01208	1.75369	3.53761	0.00104281	0.00277812
AC068987.3	1.75269	3.54357	4.63e-05	0.000175377
AC111182.1	1.74968	5.41565	7.69e-08	5.94e-07
FAM182B	1.74955	4.87404	6.82e-09	6.77e-08
AC080129.2	1.74769	5.02464	2.04e-09	2.29e-08
LINC01876	1.74416	5.16431	3.38e-06	1.73e-05
AC016737.1	1.74211	4.4666	5.33e-11	8.42e-10
AC007785.3	1.73757	3.36118	1.58e-07	1.12e-06
LINC00967	1.73579	3.70994	0.00107969	0.0028579
AC084757.3	1.73515	3.66175	6.73e-06	3.15e-05
AL353747.3	1.73273	3.88985	0.00111004	0.00292568
AP000679.1	1.72819	3.50999	0.00100388	0.00268939
AL157395.1	1.72772	3.49123	0.000277795	0.000865902
AC005324.5	1.72613	3.92296	9.83e-05	0.000344556
LINC00348	1.72372	6.17755	0.000808536	0.00221612
AC073842.2	1.72033	4.21505	1.03e-08	9.75e-08
CAPN10-DT	1.72016	6.44747	1.95e-16	1.06e-14
LINC01807	1.72003	4.40051	0.00032148	0.000983219
CYTOR	1.71867	10.3314	4.94e-11	7.91e-10
AP001094.3	1.71857	3.507	0.00258133	0.00617399
AC008738.6	1.71454	3.73114	2.1e-05	8.63e-05
Z97056.1	1.71344	7.40255	2.78e-06	1.46e-05
AC007552.2	1.71274	3.47963	0.000174333	0.000575335
AC145343.1	1.71022	5.84548	1.7e-12	4.08e-11
AC018809.1	1.70754	4.18834	1.4e-08	1.29e-07
FLJ31104	1.70505	5.33338	9.75e-11	1.46e-09
AC239803.1	1.70154	3.88357	0.000443567	0.0013093
AC005264.1	1.69925	3.76758	1.05e-08	9.9e-08
LHFPL3-AS2	1.69924	6.18155	0.000429315	0.00126948
AC132192.2	1.69915	6.24429	1.54e-19	1.87e-17
LRP4-AS1	1.69854	3.80205	2.67e-06	1.4e-05
AC090772.3	1.69751	5.49829	2.1e-08	1.84e-07
AL359397.1	1.69711	3.43806	3.58e-05	0.000138914
AC021683.2	1.69361	3.63713	0.00063414	0.00178321
AC010149.1	1.69333	3.69438	5.39e-06	2.6e-05
AC233280.1	1.69281	4.07068	2.24e-08	1.93e-07
AC012073.1	1.69275	6.4513	9.85e-09	9.42e-08
AL121772.1	1.69175	4.78787	4.71e-09	4.9e-08
AL158212.3	1.68752	7.46442	2e-14	6.88e-13
AL158196.1	1.68586	3.81011	4.59e-06	2.26e-05
BSN-DT	1.68391	4.7137	1.78e-06	9.81e-06
AP001453.2	1.68363	6.62514	5.89e-11	9.26e-10
CELF2-AS1	1.68315	4.08479	0.000923231	0.00250054
MELTF-AS1	1.683	6.17924	6.92e-13	1.81e-11
AC074286.1	1.68151	3.33456	0.000498822	0.00144546
TM4SF19-AS1	1.68026	5.07941	2.52e-13	7.01e-12
MRPL23-AS1	1.6774	4.99575	0.000886226	0.00241088
LINC00323	1.67698	4.12117	0.000935807	0.00253016
AC024560.1	1.67184	4.74729	2.12e-05	8.69e-05
LINC00482	1.67092	8.70816	1.06e-14	3.93e-13
AC100803.3	1.66978	4.94112	1.42e-06	8.04e-06
AC092119.2	1.66938	5.20756	2.25e-13	6.34e-12
ARLNC1	1.66868	5.47848	1.42e-05	6.14e-05
STPG3-AS1	1.6665	6.93043	1.05e-08	9.92e-08
AC078906.1	1.66516	3.54568	0.00175261	0.00439968
AC023355.1	1.66118	4.58856	3.57e-08	2.95e-07
AC012485.2	1.65934	4.34193	1.15e-06	6.64e-06
LINC01353	1.65341	4.39541	3.06e-06	1.58e-05
AC008875.1	1.65255	3.687	1.25e-06	7.17e-06
AL445488.1	1.64968	3.33095	2.93e-06	1.52e-05
AC015845.2	1.64932	3.77329	0.000788626	0.00216925
AC137894.1	1.64832	3.4126	0.000563512	0.001611
AC007663.2	1.64822	5.30505	7.57e-05	0.000271923
CASC16	1.64559	3.5394	0.000256757	0.000810791
AC036108.2	1.64546	5.26544	1.2e-07	8.83e-07
AC108463.2	1.64352	4.14871	8.51e-11	1.29e-09
AC087742.1	1.64287	3.82894	3.21e-05	0.000126194
AC012313.8	1.64052	5.16679	1.36e-11	2.59e-10
LINC01948	1.6402	4.34671	6.94e-05	0.000251479
AP003559.1	1.63989	4.22608	6.15e-06	2.91e-05
AL357146.1	1.63954	3.68497	0.000733683	0.00203717
LINC02367	1.63689	4.92481	3.77e-06	1.9e-05
AC005393.1	1.63573	4.14735	3.98e-09	4.22e-08
AL136162.1	1.63558	5.12958	2.22e-16	1.17e-14
LINC01719	1.63209	7.19119	9.22e-11	1.39e-09
BX640514.2	1.63081	5.7563	0.00397725	0.00904693
AC064807.2	1.63027	4.09139	0.000194978	0.000635659
LINC01954	1.62782	3.97716	0.000480925	0.00140374
AC016773.1	1.62685	4.94907	5.01e-12	1.09e-10
AC139491.2	1.62656	7.09265	4.89e-06	2.39e-05
AL590705.1	1.62633	5.18403	6.7e-07	4.14e-06
AC092167.1	1.62491	3.43888	0.00142694	0.00366097
AL355488.1	1.62422	7.79331	9.77e-16	4.44e-14
AL355388.2	1.62104	4.32164	8.38e-07	5.03e-06
ZNF426-DT	1.62004	5.67218	1.12e-08	1.05e-07
AL121832.3	1.61882	4.92873	3.45e-10	4.6e-09
AC098617.1	1.61638	4.28367	0.0031587	0.00740867
AC025575.2	1.61519	3.84041	0.000586364	0.00166748
LINC01572	1.61407	4.387	1.57e-07	1.12e-06
ELF3-AS1	1.61284	7.91399	1.79e-11	3.33e-10
AC093627.7	1.61265	4.49337	0.00016333	0.000543963
AC100793.4	1.61239	4.68694	2.02e-05	8.36e-05
AC006538.1	1.61038	4.92978	6.23e-10	7.89e-09
AC093249.2	1.60969	3.83836	2.77e-05	0.000110556
AP001432.1	1.6065	4.03769	9.47e-07	5.6e-06
LINC00184	1.60641	3.37053	0.0010331	0.00275582
AL121658.1	1.60235	4.43651	1.01e-09	1.23e-08
AC139100.2	1.59873	5.71601	1.05e-12	2.63e-11
AC026250.1	1.59663	5.73177	3.94e-12	8.85e-11
AC011447.3	1.59649	4.86712	1.47e-08	1.34e-07
AP003419.3	1.59649	4.51311	2.72e-09	2.98e-08
PCAT6	1.5951	7.57488	7.76e-15	3.04e-13
LINC01424	1.59143	3.7106	4.07e-07	2.62e-06
AL137009.1	1.59092	3.95534	0.000568055	0.00162174
AL583785.1	1.58948	3.72839	0.000355559	0.00107626
AC106820.2	1.58764	3.7721	1.58e-06	8.77e-06
LINC01914	1.58738	4.67895	0.000416648	0.00123693
AC013400.1	1.5843	3.44437	5.71e-06	2.73e-05
AC005487.1	1.58394	3.40083	6.56e-05	0.000238511
AC115099.1	1.58273	3.59931	0.00221163	0.00537507
FLVCR1-DT	1.58257	8.43355	1.38e-11	2.62e-10
SLC12A9-AS1	1.58224	4.70474	2.55e-07	1.71e-06
HEXA-AS1	1.58086	5.14956	2.31e-10	3.22e-09
PRKAR2A-AS1	1.58038	7.30839	4.47e-17	2.86e-15
LINC02315	1.58033	5.17591	0.000960193	0.00258703
STAM-AS1	1.57579	4.25029	2.42e-07	1.63e-06
AC005498.2	1.57534	4.16932	0.000110089	0.000380173
LINC00535	1.57511	6.86323	3.8e-08	3.12e-07
AC112484.3	1.57463	5.70323	2.74e-10	3.72e-09
STK24-AS1	1.57414	5.09464	7.28e-12	1.51e-10
LINC01091	1.57373	5.85734	5.09e-08	4.08e-07
FGF13-AS1	1.5733	3.69767	0.000574119	0.00163603
AL139220.2	1.57192	4.83345	7.41e-09	7.28e-08
AC005041.3	1.57097	5.79604	5.13e-12	1.11e-10
LGALS8-AS1	1.57094	5.63583	1.02e-08	9.71e-08
DCST1-AS1	1.56803	7.52658	1.06e-16	6.06e-15
AC002454.1	1.56766	3.935	5.11e-05	0.000191077
AL583810.2	1.56655	3.79133	8.8e-05	0.000312155
AC016723.1	1.56055	4.73313	0.000361998	0.00109194
TRIM31-AS1	1.55853	3.56464	0.000611865	0.00173003
AC090337.1	1.55565	3.56718	0.000592153	0.00168199
AC073263.1	1.55473	3.90184	0.000264204	0.000830241
TDRKH-AS1	1.55462	5.29189	6.82e-12	1.44e-10
AC024941.2	1.55394	3.54515	0.000284283	0.000882564
LINC00622	1.54979	5.52485	2.04e-07	1.41e-06
AC103706.1	1.54855	6.4743	2.24e-12	5.25e-11
LINC02407	1.54756	3.93923	0.000127054	0.00043319
FLJ31356	1.54729	4.35093	0.00018979	0.000620107
AP000688.2	1.5466	3.92736	0.00319754	0.00748557
AC008403.3	1.54572	3.56539	0.000201049	0.000653727
AL591845.1	1.54289	6.6747	3.44e-08	2.85e-07
EHD4-AS1	1.54264	4.01163	4.32e-08	3.51e-07
AC015987.1	1.53828	4.16144	0.000999667	0.00267937
CTD-2201I18.1	1.53748	6.04497	1.1e-10	1.63e-09
LINC00640	1.53621	3.66476	0.000188799	0.000617469
AL033527.2	1.536	3.77737	0.000767231	0.0021181
AC110285.2	1.53503	7.33227	6.13e-09	6.18e-08
AL355607.1	1.53075	3.71234	0.000580448	0.00165254
AC024243.1	1.52974	3.45218	0.000215336	0.000693251
AL355803.1	1.52971	4.39208	5.87e-06	2.8e-05
AC005089.1	1.52942	6.41314	1.07e-09	1.28e-08
AC002480.1	1.52882	4.55377	0.000620275	0.0017522
MIR3681HG	1.52689	4.49445	0.00018422	0.000605056
AL049870.3	1.52679	4.16991	0.00115827	0.00303856
AC090164.2	1.52383	4.66793	1.1e-05	4.88e-05
AC095033.1	1.52207	3.90537	0.000860332	0.00234457
AC008742.1	1.52176	3.6869	0.000185397	0.000608597
AL365295.1	1.51948	5.30789	5.13e-07	3.23e-06
LINC02544	1.51936	4.20872	0.00315774	0.00740867
AC017002.2	1.51933	3.39533	0.00084916	0.00231821
AC026495.1	1.51784	3.96499	5.92e-05	0.000217827
AC091182.1	1.51517	5.27864	1.91e-09	2.16e-08
AC124067.2	1.51502	3.93361	2.65e-05	0.000105958
TSPEAR-AS1	1.51472	7.23994	3.67e-06	1.86e-05
AC011462.4	1.51445	4.6043	1.21e-11	2.35e-10
AC009414.2	1.51361	7.24446	2.52e-08	2.13e-07
LINC00565	1.51259	4.31582	0.000838977	0.00229345
AP003548.1	1.50981	3.55987	0.0010895	0.00288015
LINC01389	1.50975	5.46754	7.31e-10	9.15e-09
AL355802.2	1.50925	5.31098	1.3e-10	1.9e-09
RHPN1-AS1	1.50747	6.66103	4.6e-14	1.5e-12
BAALC-AS1	1.5049	6.15621	2.52e-11	4.49e-10
LINC00685	1.50433	4.98314	2.29e-11	4.13e-10
RAPGEF4-AS1	1.50334	3.86706	0.000268887	0.000842385
AC007998.3	1.50302	4.9118	1.35e-07	9.79e-07
AC145423.2	1.50228	4.1825	1.09e-05	4.82e-05
AC074138.1	1.50104	3.831	1.7e-07	1.2e-06
AC025171.3	1.49931	3.60753	8.72e-06	3.98e-05
AC007114.2	1.4982	4.52231	3.9e-06	1.96e-05
AC023908.3	1.49814	4.44029	3.91e-09	4.15e-08
AC097641.2	1.49802	4.22573	2.4e-10	3.33e-09
AL035701.1	1.49801	5.13215	7.18e-07	4.4e-06
AC005387.2	1.49606	3.64182	1.55e-06	8.62e-06
AC117382.2	1.49569	3.40386	0.00113649	0.00298902
AC105137.2	1.4949	4.26499	2.1e-08	1.84e-07
AC106820.3	1.49119	5.38171	5.79e-09	5.91e-08
AC010907.2	1.49117	4.04354	0.00107068	0.00283768
AC013731.1	1.48655	4.76185	2.62e-11	4.63e-10
AC124276.1	1.48621	4.64484	0.000904234	0.00245662
AC027601.2	1.4856	3.92723	1.14e-06	6.62e-06
AL365356.4	1.48444	4.60664	2.09e-05	8.6e-05
AC011247.1	1.48327	4.70227	2.33e-06	1.24e-05
SREBF2-AS1	1.48108	8.0518	7.7e-21	1.36e-18
AL357079.1	1.48097	4.89252	2.9e-09	3.16e-08
AC012146.1	1.48082	8.30679	2.61e-11	4.63e-10
AL356108.1	1.47948	3.56506	0.00034987	0.00106112
AC145423.3	1.47902	3.94798	1.28e-07	9.28e-07
AC092535.4	1.47821	7.66121	6.12e-09	6.18e-08
CU639417.4	1.47697	3.98756	0.00300648	0.00710561
CASC15	1.4768	6.67328	5.85e-08	4.62e-07
AC084033.3	1.47018	7.89115	7.28e-16	3.38e-14
AL031665.1	1.46893	3.36977	0.00199701	0.00492712
LUARIS	1.46782	4.22553	0.000522825	0.00150513
LINC02547	1.4676	5.1614	0.0020446	0.00502482
AC073370.1	1.46673	3.52164	0.00193452	0.00479402
AC139100.1	1.4665	5.95385	1.19e-10	1.76e-09
AC010997.4	1.46487	3.39346	5.79e-05	0.000214334
LINC01152	1.46428	6.35739	8.58e-05	0.000305114
DIAPH2-AS1	1.46331	4.27481	0.000508597	0.00146965
AC012456.2	1.45893	3.80299	0.000167342	0.000556425
AC024361.1	1.45811	4.91297	1.52e-12	3.68e-11
AC010148.1	1.45784	5.07315	7.87e-07	4.75e-06
AL033384.2	1.45653	3.33714	0.000362154	0.00109194
MLIP-AS1	1.45303	5.39077	0.000305741	0.000938801
ZNF793-AS1	1.44993	6.08027	1.17e-07	8.64e-07
LINC02487	1.44956	6.59779	4.58e-07	2.92e-06
AC020915.2	1.44945	4.44523	7.8e-07	4.72e-06
LINC00923	1.44911	5.09153	0.0007897	0.00217123
AC004263.1	1.44893	4.12974	1.15e-05	5.07e-05
AL592424.1	1.44872	5.92725	3.31e-09	3.57e-08
ZIM2-AS1	1.4459	4.24923	0.000267982	0.000840403
AL512598.1	1.44578	4.49147	1.87e-05	7.83e-05
AC092117.1	1.44419	6.08226	1.39e-10	2.02e-09
RAMP2-AS1	1.44343	7.22177	2.03e-06	1.1e-05
ITGB1-DT	1.44119	8.36884	0.000577215	0.00164409
AP000924.1	1.43933	5.86623	0.00101996	0.00272757
AC026368.1	1.43649	4.01591	2.55e-05	0.000102621
DDX39B-AS1	1.43573	4.16787	1.47e-06	8.24e-06
AC010201.2	1.43508	5.05452	1.38e-10	2.01e-09
AC005828.4	1.43465	3.45688	0.00234693	0.00566823
AC022211.2	1.43464	6.44952	2.73e-11	4.81e-10
AC090409.1	1.43455	4.56474	9.44e-07	5.58e-06
LINC01126	1.43421	4.88193	2.39e-08	2.03e-07
AL161729.4	1.43277	3.52965	3.59e-05	0.000139076
AL008582.1	1.4327	3.98768	2.55e-06	1.35e-05
DSCR9	1.43222	3.98174	1.18e-07	8.72e-07
MINCR	1.43177	8.93278	1.03e-12	2.6e-11
AC017083.1	1.43057	4.29571	6.44e-08	5.06e-07
AC008622.2	1.42826	4.401	1.68e-05	7.11e-05
LINC01311	1.42743	5.64031	7.24e-14	2.24e-12
AC243772.2	1.42645	4.04714	7.34e-05	0.000264409
AP001412.1	1.42564	4.12136	3.42e-08	2.84e-07
AC137630.3	1.4241	4.44878	7.56e-07	4.61e-06
AC107959.2	1.42373	3.36915	0.000120963	0.00041448
AC121247.1	1.42219	4.19048	0.000186999	0.000613205
AC118758.3	1.42184	3.7645	0.00119229	0.00311853
AL117328.2	1.42015	3.50182	0.000389324	0.00116566
LINC02579	1.41967	3.36099	0.00204555	0.00502482
AC090826.1	1.41804	4.19068	8.98e-05	0.000317257
AL596223.2	1.41701	3.4052	0.000418051	0.0012399
AC106786.1	1.41691	3.9207	0.000599498	0.00169972
AC079174.2	1.41502	5.65318	4.04e-12	8.98e-11
AL033397.1	1.41467	9.98242	0.000107794	0.000373081
LOXL1-AS1	1.41451	6.55218	1.84e-05	7.71e-05
AC245595.1	1.41263	4.36866	5.84e-07	3.66e-06
DNAJB5-DT	1.4126	3.69338	0.0011652	0.00305414
AC025171.5	1.41148	4.71933	1.25e-07	9.17e-07
AL118511.1	1.41116	4.50498	1.27e-07	9.28e-07
DIRC3	1.41018	5.15764	3.19e-05	0.000125535
LINC01943	1.40758	5.72233	7.75e-08	5.98e-07
GSEC	1.40735	7.79177	1.52e-10	2.19e-09
AL512274.1	1.40657	5.32786	0.00237367	0.00572162
AL158212.2	1.40423	3.82996	2.24e-05	9.16e-05
AL021707.2	1.40394	6.42078	4.94e-14	1.58e-12
AC133919.2	1.40355	5.46518	0.000255206	0.00080689
LINC00528	1.40343	6.98319	3.01e-12	6.9e-11
AP001636.3	1.40045	6.69645	4.46e-09	4.67e-08
CEP83-DT	1.39825	4.82684	1.51e-09	1.75e-08
AC010973.1	1.3978	3.43474	0.000101684	0.000355119
DNAH10OS	1.39772	7.5666	3.59e-09	3.84e-08
AL133410.1	1.3967	4.68209	2.61e-07	1.74e-06
AP000350.5	1.3956	4.21432	2.16e-07	1.48e-06
CR381653.1	1.39537	5.48367	2.65e-09	2.9e-08
AL121790.2	1.39494	3.51109	0.00251507	0.00602253
EPHA1-AS1	1.39365	5.40443	0.000128901	0.000438277
AC004596.1	1.39267	3.82081	0.000188456	0.000616992
AP003119.1	1.39072	5.74262	4.17e-05	0.000159511
AL442067.1	1.38985	3.49998	0.000935444	0.00253016
LINC01138	1.38535	8.63261	4.45e-15	1.8e-13
AL121895.2	1.38485	4.01244	0.000509864	0.00147125
AL031705.1	1.38351	3.40234	3.47e-05	0.000135263
LINC02450	1.38313	3.47523	0.00318148	0.00745363
AL139286.2	1.38174	3.85137	3.47e-07	2.25e-06
AF186192.3	1.38141	3.4685	0.00114102	0.00299864
AC108676.1	1.37967	5.37759	1.37e-05	5.92e-05
AL160314.2	1.3783	4.48069	6.48e-09	6.47e-08
GAS5	1.37799	13.2057	1.63e-14	5.72e-13
AC022154.1	1.37643	4.16672	8.06e-07	4.85e-06
LINC01634	1.37557	3.58804	0.00261041	0.00623304
AC116337.3	1.37551	4.05428	1.89e-05	7.91e-05
AL162574.2	1.37057	3.42942	0.000928771	0.00251444
LINC00470	1.36982	6.90993	0.00167537	0.00422293
AC139887.1	1.36938	4.78889	2.13e-08	1.86e-07
SNHG25	1.36876	6.41799	9.05e-11	1.36e-09
ATP6V0E2-AS1	1.367	6.87234	6.75e-10	8.5e-09
AC138696.2	1.3666	5.99639	3.72e-10	4.9e-09
SEMA3B-AS1	1.36651	6.02557	1.19e-06	6.87e-06
SLC9A3-AS1	1.3665	9.69068	2.71e-08	2.29e-07
AC129492.1	1.36611	4.25252	0.00438705	0.00988446
GUSBP11	1.36481	6.72459	1.57e-12	3.8e-11
AC011511.2	1.3645	3.32908	0.00428705	0.0096945
GATA2-AS1	1.36144	6.4993	7.69e-06	3.55e-05
AC026355.1	1.36107	3.50066	0.00376658	0.00863129
AC011503.2	1.36098	6.78791	1.54e-07	1.1e-06
VLDLR-AS1	1.36012	4.91307	0.000215585	0.000693328
AC245060.6	1.35999	5.84923	3.17e-08	2.65e-07
MIR1-1HG-AS1	1.35731	4.04041	0.00381188	0.00872538
RGS5	1.35671	6.67813	8.24e-16	3.8e-14
LINC00886	1.35451	9.51072	2.07e-07	1.43e-06
AP003469.4	1.35308	8.84759	9.69e-15	3.65e-13
AC092683.1	1.35194	4.03378	4.05e-05	0.000155088
AC108463.3	1.35143	3.64562	0.00118268	0.00309586
AC007773.1	1.35124	6.01242	1.47e-11	2.76e-10
LINC00862	1.35042	5.65068	2.81e-08	2.36e-07
AC005332.5	1.35004	8.74704	9.51e-19	9.48e-17
AL157896.1	1.34778	3.77302	0.00187571	0.00466888
LINC00992	1.34746	6.21598	0.00212282	0.00518987
AC106038.1	1.34311	3.55974	0.00010221	0.000356752
AC022306.3	1.34288	4.64401	1.4e-06	7.94e-06
FBXL19-AS1	1.342	7.00415	2.05e-12	4.82e-11
AL031123.2	1.34144	6.82147	7.65e-09	7.47e-08
AL590004.3	1.34038	7.14762	0.000155969	0.000521979
LINC01843	1.33922	8.90534	9.88e-08	7.4e-07
AC096642.1	1.33912	5.03132	1.92e-08	1.69e-07
AC026254.2	1.33881	4.1644	7.55e-07	4.61e-06
KCCAT333	1.33822	3.55199	0.0013737	0.00353908
AC006059.1	1.33789	4.51576	0.000256049	0.00080914
LINC01607	1.33778	5.27611	1.84e-07	1.28e-06
LINC00244	1.33741	3.46622	0.00037359	0.00112477
AL157834.1	1.33721	3.64725	0.000221362	0.000708956
AL117382.1	1.33553	6.07943	0.000292156	0.000902876
AL160006.1	1.33415	8.61405	7.08e-12	1.49e-10
AC098820.1	1.33394	5.81346	1.35e-10	1.98e-09
AL031316.1	1.3334	8.18358	2.66e-06	1.4e-05
AC102953.1	1.33019	4.34638	1.67e-05	7.1e-05
AL035461.2	1.3301	6.50168	1.61e-11	3.01e-10
AC011815.1	1.32932	6.28066	8.78e-10	1.08e-08
LINC02038	1.3286	4.7902	0.00160813	0.00407508
AC009549.1	1.32818	6.26304	0.000168187	0.000558635
AL592071.1	1.3268	3.46594	0.00100774	0.00269749
AL354928.1	1.32233	3.88439	1.04e-05	4.67e-05
AL359513.1	1.32115	5.14751	1.26e-07	9.24e-07
AL133215.1	1.31877	3.5999	0.00225432	0.00547023
AC010300.1	1.31547	5.68708	2.16e-09	2.42e-08
AP006621.2	1.315	5.11285	4.55e-06	2.24e-05
AC010999.2	1.31295	3.671	0.000257025	0.000810981
AL513320.1	1.31104	4.26171	1.61e-06	8.93e-06
AL589765.6	1.30785	3.48474	5.24e-05	0.000195419
AC139887.4	1.30773	4.28732	1.17e-06	6.74e-06
LINC02029	1.30692	6.72345	0.000169279	0.000561355
AC025171.2	1.3061	6.92904	1.03e-11	2.07e-10
BX649632.1	1.30599	4.21093	9.17e-07	5.46e-06
AC004000.1	1.30572	3.4759	0.00200999	0.00495123
AC005753.1	1.30562	3.36963	0.000221962	0.00071051
AC025580.3	1.30455	4.50816	2.8e-06	1.46e-05
OBSCN-AS1	1.30418	5.25057	8.84e-05	0.000313011
AC010127.1	1.30413	5.08381	0.0036144	0.00833512
AC027237.2	1.30397	3.52112	4e-05	0.000153613
AL136172.1	1.30259	3.46422	0.00222819	0.00541107
AC024257.3	1.30231	3.78788	0.00121813	0.00318208
AC104964.1	1.30176	3.51277	0.00354342	0.00820654
AC131009.1	1.30091	4.88672	2.23e-07	1.52e-06
AC010973.2	1.30075	6.01488	5.05e-12	1.1e-10
AL928654.1	1.30063	7.16384	4.91e-13	1.32e-11
AC104667.1	1.30003	4.10755	8.51e-05	0.00030346
LINC02043	1.29808	3.50763	0.000234422	0.000746142
AC012360.1	1.29743	3.75806	1.35e-05	5.84e-05
AL731566.2	1.29714	4.1105	0.000213758	0.000688887
LINC01344	1.29636	6.14202	1.94e-05	8.09e-05
AC036214.1	1.29616	3.46644	0.000619967	0.00175213
LINC01089	1.29466	8.70101	4.87e-17	3.04e-15
LINC01730	1.29375	4.16533	1.89e-05	7.9e-05
AC138904.1	1.29311	3.78946	0.000758467	0.00209844
AC011944.1	1.29303	3.77867	0.00142396	0.00365638
AC010463.3	1.29185	3.81656	7.49e-06	3.47e-05
AL022322.1	1.29078	5.77314	5.38e-09	5.51e-08
RUSC1-AS1	1.28956	8.7207	1.15e-11	2.25e-10
TMPO-AS1	1.28902	8.35573	1.35e-13	3.95e-12
AC007608.3	1.28845	5.69245	4.52e-05	0.000171636
LINC00513	1.28687	6.89258	1.42e-05	6.12e-05
AC025171.4	1.28614	5.16822	1.21e-06	6.96e-06
AC099066.2	1.28609	4.96665	0.00025054	0.000793784
SPRY4-AS1	1.28462	4.19911	0.000161853	0.000539917
AC002116.2	1.28458	5.14067	6.47e-08	5.08e-07
AL358072.1	1.28431	4.00904	3.8e-06	1.91e-05
AC022150.4	1.28427	5.54683	3.2e-05	0.000125717
AL157823.2	1.28215	3.92014	7.85e-05	0.000281445
DGCR11	1.28146	8.0694	7.02e-09	6.93e-08
AC078778.1	1.28132	4.81927	2.31e-06	1.23e-05
ZKSCAN2-DT	1.28074	6.42145	7.77e-14	2.38e-12
AL138966.2	1.27974	3.72879	0.000128864	0.000438277
AL353708.1	1.27776	5.79139	4.02e-11	6.56e-10
AP003680.1	1.27688	3.63836	0.000170048	0.000563287
USP2-AS1	1.27593	7.62859	7.8e-06	3.59e-05
ZNF571-AS1	1.27582	5.07405	4.99e-06	2.43e-05
AC127496.1	1.2755	4.24889	3.51e-07	2.28e-06
AC112484.1	1.27495	5.42855	1.21e-07	8.92e-07
BX649601.1	1.27427	4.85008	1.02e-05	4.59e-05
TGFB2-AS1	1.27147	4.50796	0.000535218	0.00153509
AC114284.1	1.26651	3.60106	0.000401334	0.0011978
CU634019.6	1.26628	3.56638	0.0010936	0.00288729
AC018648.1	1.26556	3.61138	9.85e-06	4.44e-05
AC097059.1	1.26469	3.57995	0.00180665	0.004517
AL117350.1	1.2604	3.60959	0.000233092	0.000742673
AL928921.1	1.26011	7.0535	2.1e-05	8.63e-05
LINC01315	1.2583	6.52381	1.68e-07	1.19e-06
AC006064.3	1.25579	3.58413	9.3e-05	0.000327623
LINC00702	1.2537	6.23581	3.08e-09	3.34e-08
AC211476.2	1.25165	3.59235	3.5e-05	0.000135957
AC005785.1	1.25085	5.82988	8.56e-08	6.54e-07
AC006213.3	1.25042	4.36596	0.000338696	0.00103077
LINC01134	1.24967	7.277	3.07e-11	5.26e-10
Z84485.1	1.24736	5.7641	9.37e-08	7.09e-07
SOX9-AS1	1.24689	9.20581	1.93e-06	1.05e-05
AL035252.3	1.24491	5.91144	4.44e-06	2.19e-05
AC007365.1	1.24222	3.3947	0.000628963	0.00177158
AC016924.1	1.24179	6.25535	3.38e-06	1.73e-05
AL512306.3	1.23964	3.79814	0.000424238	0.00125765
AC037487.1	1.23952	3.76493	6.05e-05	0.000221275
VAC14-AS1	1.23745	6.90907	0.000555564	0.00158975
LINC01952	1.23692	3.53777	0.00147201	0.0037579
AC243965.2	1.23492	4.66524	1.82e-05	7.65e-05
AC010132.4	1.2348	3.95916	5.11e-06	2.48e-05
ZNF341-AS1	1.23131	3.78935	0.00144999	0.00371242
AC097717.1	1.2303	3.55295	0.000282412	0.000878077
AL391069.4	1.23011	3.36359	0.00178937	0.00447922
AL355303.1	1.22717	4.89057	1.11e-05	4.91e-05
LINC01836	1.22419	6.44126	3.01e-05	0.000118915
MIS18A-AS1	1.22286	3.88083	6.17e-06	2.92e-05
AC008610.1	1.22251	5.27397	6.63e-07	4.11e-06
AC008870.4	1.22168	3.35648	0.000539845	0.00154692
AC090241.3	1.22163	3.68392	0.00139295	0.00358267
AL359265.3	1.22038	4.71304	3.72e-07	2.4e-06
RMDN2-AS1	1.21915	3.70717	0.00155648	0.0039588
AP000757.1	1.21796	5.66568	0.00203124	0.0049976
AP002360.3	1.21705	4.45493	3.26e-06	1.68e-05
AC069222.1	1.21692	3.88281	0.000156358	0.000523
SLC6A1-AS1	1.21356	5.4172	0.000181405	0.000596444
AC027228.2	1.21085	4.38809	0.000972656	0.00261605
AL161891.1	1.20958	6.40969	2.78e-08	2.34e-07
AL135744.1	1.20924	3.65372	8.85e-05	0.000313482
AC026765.2	1.20824	7.27677	0.00289289	0.00686077
AC021321.1	1.20823	4.02409	1.55e-05	6.61e-05
CARMN	1.20814	6.45251	6.16e-05	0.000225038
AL355574.1	1.20744	5.158	4.34e-08	3.52e-07
ZMIZ1-AS1	1.20168	6.35065	1.85e-07	1.29e-06
AC011330.2	1.20155	3.97189	2.96e-05	0.000117045
AF196972.1	1.20114	4.73778	4.91e-07	3.11e-06
DRAIC	1.20078	10.9434	0.000128326	0.000437271
AC007750.1	1.20076	3.66686	0.00348578	0.00809593
PKP4-AS1	1.20052	4.17034	6.04e-05	0.000221222
AC090825.1	1.19785	4.93618	0.00109029	0.00288102
PRC1-AS1	1.19579	3.76818	0.000126852	0.00043298
AC024075.1	1.19523	5.45973	8.37e-06	3.83e-05
LINC00235	1.19514	5.90859	3.93e-08	3.22e-07
AL391832.3	1.19417	3.90577	0.00158777	0.00403009
AC005329.1	1.19228	5.99556	0.000161587	0.00053932
AC073529.1	1.19215	4.76955	8.85e-07	5.29e-06
AL391427.1	1.19091	6.18106	8.78e-06	4e-05
HOXA-AS2	1.19041	7.82651	5.62e-06	2.69e-05
AC078777.1	1.19026	3.44841	0.000259889	0.000819599
AC020594.1	1.18985	4.42558	1.72e-06	9.5e-06
AC010487.2	1.18969	3.68742	0.00278591	0.0066223
AC022306.2	1.18892	6.40723	8e-12	1.64e-10
FOCAD-AS1	1.18837	3.48561	0.0010267	0.00273994
DNAJC9-AS1	1.18285	5.28228	9.27e-13	2.36e-11
LINC00479	1.18219	4.81586	0.000476525	0.00139261
AC114488.1	1.18211	4.2834	0.00288886	0.00685384
AC026356.2	1.18199	4.37307	6.18e-05	0.000225463
AP001347.1	1.18135	4.29244	0.00364506	0.00839643
PTPRG-AS1	1.17965	4.77429	8.1e-05	0.000289653
AL121929.2	1.17953	3.98124	0.0011074	0.00292247
AC105339.3	1.17874	3.60803	0.000188553	0.000616992
LENG8-AS1	1.17865	6.59973	4.28e-14	1.4e-12
AL021707.4	1.17659	3.4778	0.000494996	0.00143775
AC106897.1	1.17552	4.73438	0.000137755	0.000466841
AC010864.1	1.17445	4.82501	3.31e-09	3.57e-08
AC004076.2	1.17188	5.34852	4.83e-09	4.99e-08
AL356056.2	1.17102	5.42789	0.000502622	0.00145374
AC010618.2	1.17024	3.9255	2.44e-05	9.84e-05
AL117335.1	1.1698	5.38437	4.49e-06	2.22e-05
TYMSOS	1.16958	8.26141	1.01e-06	5.96e-06
AL355987.4	1.16867	5.96506	7.73e-07	4.7e-06
MCCC1-AS1	1.16845	4.70012	6.64e-06	3.12e-05
TM4SF1-AS1	1.16819	4.96975	8.11e-06	3.72e-05
AC022784.1	1.16814	6.57738	6.13e-06	2.9e-05
AC022007.1	1.16758	7.16852	3.98e-12	8.91e-11
FRY-AS1	1.16684	3.95307	0.00166304	0.00419528
AL049539.1	1.16643	3.45412	0.00150159	0.00383024
AP002761.4	1.1657	7.92484	2.12e-06	1.14e-05
FAM83C-AS1	1.16431	3.97011	0.000482998	0.00140753
AL021937.1	1.16285	3.6389	0.00118312	0.00309586
AL139289.2	1.16283	5.4782	2.81e-07	1.85e-06
AC108134.2	1.16276	5.64665	2.19e-06	1.18e-05
AC063948.1	1.16199	4.20657	1.94e-06	1.05e-05
ZNF350-AS1	1.16192	4.01442	0.000209678	0.000676444
AC127070.1	1.16171	4.40987	0.000389517	0.00116566
AC004156.1	1.16118	4.61557	8.63e-05	0.000306559
NKILA	1.16015	6.06619	0.000809366	0.00221643
PRRT3-AS1	1.16005	6.85397	3.35e-06	1.72e-05
AL049794.1	1.15914	4.52985	3.81e-05	0.000146779
ITFG1-AS1	1.15892	3.52587	0.000492517	0.00143189
AC092910.3	1.15872	5.79173	1.56e-08	1.41e-07
AC018410.2	1.15792	3.56524	0.000680966	0.00190496
LINC00304	1.15771	3.9481	0.00251958	0.00603098
AL359644.1	1.15765	4.10327	0.00192428	0.00477629
AP001469.2	1.15644	3.63326	0.00056507	0.00161396
AL158063.1	1.15602	3.95756	8.73e-06	3.98e-05
AL353807.2	1.14765	3.51551	0.0020971	0.00514122
LNCTAM34A	1.14699	6.99293	6.08e-07	3.8e-06
AC084018.1	1.14677	5.81808	2.77e-06	1.45e-05
AC007611.1	1.14621	5.7076	1.34e-09	1.57e-08
AC011481.1	1.14617	4.14263	3.62e-06	1.84e-05
AC007405.1	1.14563	5.42178	1.07e-07	8.02e-07
AP003059.2	1.14547	3.48008	0.00237324	0.00572162
AC010201.1	1.14537	3.60726	0.000620632	0.00175241
AC100803.2	1.14447	6.33901	6.55e-05	0.00023832
HOXB-AS3	1.14305	4.88796	0.00226226	0.00548303
LINC01637	1.1422	5.86491	3.36e-06	1.72e-05
PLA2G4C-AS1	1.14206	4.28381	1.89e-05	7.91e-05
CPEB2-DT	1.14088	4.12462	0.000116389	0.000399917
AC092171.3	1.13948	7.91542	1.41e-09	1.65e-08
AC007996.1	1.13941	8.01459	3.86e-11	6.32e-10
AL031963.2	1.13888	3.42525	0.00358104	0.00827446
C8orf37-AS1	1.13639	4.47017	0.000250675	0.000793784
AC022893.1	1.13614	5.82687	5.5e-07	3.46e-06
AL133338.1	1.13556	7.61923	2.09e-06	1.13e-05
AP001437.1	1.13496	4.18382	0.000145883	0.000491687
AC084125.2	1.13458	7.88887	7.4e-06	3.43e-05
AC009118.2	1.13452	3.69515	4.04e-05	0.000154843
AC068580.1	1.13441	4.78949	2.1e-05	8.63e-05
AC051619.5	1.13333	4.73729	0.000143267	0.000483662
AL161772.1	1.13332	4.22339	0.00221154	0.00537507
AC131934.1	1.13251	3.39868	0.00123327	0.00321346
AL357078.3	1.13138	3.46445	0.00232197	0.00561894
AC005837.1	1.13065	4.55276	1.34e-05	5.81e-05
AC063919.1	1.12942	5.77895	0.00033575	0.00102231
AC008655.2	1.12916	3.53355	0.000261164	0.000822779
LINC02099	1.1277	3.57897	0.00370531	0.00851615
AL133520.1	1.12736	7.30761	0.000146307	0.000492581
AC121338.2	1.12627	5.65322	1.89e-05	7.9e-05
AC007663.3	1.12594	4.57314	9.65e-06	4.36e-05
AL031665.2	1.12501	4.93979	1.97e-07	1.37e-06
AC004707.1	1.12394	5.57122	0.000237398	0.000754836
AL158071.3	1.12383	4.08631	0.000411672	0.00122333
SNHG1	1.12366	10.8017	1e-12	2.54e-11
AC074044.1	1.12353	3.56974	0.000303337	0.00093374
AC111152.2	1.12234	3.46788	0.00308559	0.00725923
MID1IP1-AS1	1.12195	5.78284	3.04e-06	1.57e-05
AC068025.1	1.12076	3.90391	0.000269982	0.000845388
CASC11	1.12064	3.45017	0.00165653	0.004184
AL031985.3	1.11941	7.74941	7.77e-12	1.6e-10
LINC01301	1.11851	6.0651	6.3e-09	6.31e-08
AC027682.4	1.11589	3.70379	0.000527615	0.0015161
AC131009.2	1.11545	5.39233	0.00159967	0.00405772
AP001453.3	1.11254	5.68651	3.46e-10	4.6e-09
AC022809.1	1.11216	4.16893	7.07e-05	0.000255909
LINC02292	1.11136	5.37999	1.65e-05	7.01e-05
AC009093.1	1.11026	4.46703	7.75e-05	0.000278207
NDST1-AS1	1.10948	5.48716	0.000692326	0.00193276
TBX2-AS1	1.10883	6.43855	6.08e-06	2.89e-05
C9orf106	1.10879	5.0865	0.000549015	0.00157247
AC137932.2	1.10795	4.31896	0.000158405	0.000529559
AL031673.1	1.10751	6.60627	9.69e-10	1.18e-08
AC011498.6	1.10743	3.99038	1.92e-05	8.01e-05
AL121772.3	1.10729	4.2113	0.000114499	0.000394079
AC026369.2	1.10629	6.49772	2.76e-06	1.44e-05
AC245060.2	1.10593	3.98501	0.000747336	0.00207228
AL732292.2	1.10532	4.12422	0.000636187	0.00178816
AC010501.1	1.10352	5.6197	0.00076729	0.0021181
AC008906.2	1.10265	3.56175	0.00306753	0.00722776
AC010331.1	1.1026	5.07331	3.15e-07	2.05e-06
AC012074.1	1.10202	4.08768	0.000966771	0.00260249
AC110285.5	1.10103	3.36415	0.00184702	0.00460116
AC048341.2	1.10097	5.52703	1.27e-06	7.3e-06
AL031709.1	1.1009	3.78643	5.54e-05	0.000205682
AL139089.1	1.10058	5.21709	1.26e-07	9.23e-07
AL139123.1	1.10011	3.82424	9.81e-05	0.000344094
AC098828.3	1.09887	5.1975	0.00184547	0.00459915
AC009902.2	1.09859	3.37463	0.00391071	0.00891197
AC022146.2	1.09834	3.43765	0.00092124	0.00249624
FMR1-AS1	1.0966	4.04071	0.000550923	0.0015772
AC004877.1	1.0958	3.89832	0.000482587	0.001407
LINC00205	1.09401	7.30641	2.95e-11	5.11e-10
AL442128.2	1.09248	4.16574	1.02e-05	4.58e-05
C5orf66	1.09054	6.57751	0.000243725	0.000773758
AC092171.5	1.09047	7.28446	3.19e-09	3.45e-08
BACE1-AS	1.08898	7.78259	3.24e-15	1.35e-13
SAPCD1-AS1	1.08877	4.59564	9.9e-05	0.00034674
C1orf220	1.08611	6.2847	3.05e-06	1.58e-05
AL117339.4	1.08571	4.43972	9.64e-05	0.000338504
AC100812.1	1.08473	3.47131	0.0031719	0.00743399
AC024560.3	1.08457	3.75152	0.00239568	0.00576514
AC010624.1	1.08301	4.44897	0.000152172	0.00051038
AC027307.1	1.08251	3.87059	0.000676259	0.00189389
ST7-OT4	1.08061	3.96879	0.00108043	0.00285864
AC087294.1	1.08017	3.87417	0.000115581	0.000397362
MIR646HG	1.07911	5.5477	0.00292591	0.00693376
MKLN1-AS	1.07801	7.47678	2e-09	2.25e-08
PPP4R1-AS1	1.07775	3.62203	0.00310363	0.0072989
AL136985.2	1.07692	3.58578	0.00145263	0.00371699
AL365203.2	1.07539	9.0839	2.48e-09	2.75e-08
AC084855.2	1.07475	3.93022	0.00404798	0.00918752
AL589765.4	1.07388	5.95935	2.89e-06	1.5e-05
MIR2117HG	1.07361	3.93435	0.00391355	0.00891516
LINC01124	1.07229	9.58067	3.51e-05	0.000136332
C1orf229	1.0719	5.71616	8.19e-05	0.000292802
LINC01132	1.07039	6.19782	1.79e-06	9.84e-06
AL731569.1	1.0696	6.13174	3.27e-11	5.53e-10
AP000346.1	1.06877	3.48686	0.00131954	0.00341521
AC139887.2	1.06831	7.09114	7.94e-14	2.42e-12
AC097534.1	1.06831	3.95687	0.000306088	0.000939401
AC090197.1	1.06711	4.56921	1.05e-05	4.68e-05
BX539320.1	1.06475	4.83129	0.00104643	0.00278298
AP001830.1	1.06414	6.91281	1.15e-06	6.66e-06
SNHG7	1.06379	11.1505	3.05e-09	3.32e-08
LINC02345	1.062	3.96628	0.001197	0.00312952
LINC01936	1.06088	4.49201	0.000296705	0.000914692
SNHG3	1.06083	9.90906	5.01e-11	8e-10
AL592211.1	1.0597	3.53089	0.00204243	0.00502314
AC069200.1	1.05744	3.79064	0.00106964	0.00283615
GLIS2-AS1	1.05675	6.08229	0.00031282	0.000958158
AC106869.1	1.05364	4.6539	0.00132773	0.00343209
PRR34-AS1	1.05358	8.63273	2.26e-06	1.21e-05
AC011337.1	1.05307	4.28703	8.57e-05	0.00030495
LINC01271	1.05162	6.5674	3.98e-06	2e-05
U52111.1	1.05103	3.83376	0.00162915	0.00412496
AC138932.2	1.05102	3.89303	0.0019654	0.00485883
LINC02516	1.04931	3.54576	0.00229903	0.00556777
AL121583.1	1.04878	4.39744	2.29e-05	9.3e-05
AC003102.1	1.04668	6.50009	1.68e-09	1.92e-08
AC108062.1	1.04654	7.1188	2.06e-06	1.11e-05
AL121782.1	1.04577	3.46889	0.00342605	0.00796919
KDM4A-AS1	1.04468	6.50237	2.28e-08	1.95e-07
AP000892.2	1.04461	4.11106	0.000821669	0.00224813
AP001767.3	1.04289	4.23516	2.7e-05	0.000107902
AL359878.2	1.04279	3.51651	0.00217193	0.00528691
AC069544.1	1.04203	5.9314	2.57e-10	3.53e-09
AC011815.2	1.04098	4.52595	5.34e-05	0.000198804
AC079385.3	1.0401	3.67518	0.000979273	0.00263156
AP006623.1	1.03962	5.69054	4.44e-07	2.84e-06
AC040934.1	1.03843	3.41475	0.00323874	0.00757628
LINC01963	1.03794	8.42322	3.2e-08	2.67e-07
GHET1	1.03792	5.27505	4.79e-06	2.35e-05
AL031186.1	1.03756	4.59955	2.62e-07	1.75e-06
AC016575.1	1.03738	3.63325	0.00213398	0.00521507
AL662791.1	1.03438	4.48852	0.000809085	0.00221643
AC026356.1	1.03406	5.42626	4.73e-06	2.32e-05
AC073611.1	1.03387	5.81815	8.33e-06	3.82e-05
AL117379.1	1.03379	5.22779	2.17e-07	1.49e-06
AC092803.2	1.03319	7.70072	1.79e-10	2.54e-09
AC067930.3	1.03152	4.09891	0.000278706	0.000868303
AC244197.2	1.03085	4.41321	0.00374871	0.00859989
AC090515.2	1.03076	4.96643	1.97e-07	1.37e-06
LINC02321	1.03049	5.981	0.000171195	0.00056619
AL807757.2	1.03009	4.78369	0.00432986	0.00976986
AC232271.1	1.0269	6.40994	1.23e-08	1.15e-07
AL162632.3	1.02453	3.80767	0.000717782	0.0019957
AC027796.4	1.02302	5.34616	7e-05	0.000253246
SBF2-AS1	1.02273	8.45699	2.1e-13	5.98e-12
AC009120.5	1.02197	3.61759	0.000749515	0.00207739
KLHL7-DT	1.01951	5.8849	4.57e-05	0.000173469
AP001628.1	1.01883	3.48632	0.00224247	0.0054436
AC013652.1	1.01711	5.62834	0.00377532	0.00864811
AL355472.1	1.01568	7.81429	4.13e-08	3.37e-07
AC005532.1	1.01486	4.25984	0.00431154	0.00974276
AC074212.1	1.01293	7.27544	5.92e-09	6.03e-08
AC004593.1	1.01192	5.10766	0.00405727	0.00920523
AC004943.1	1.01105	3.95345	0.000834038	0.00228096
NALT1	1.01057	6.44417	9.65e-06	4.36e-05
AC092681.2	1.01001	4.22058	0.000217797	0.000699065
AC003965.1	1.00956	5.07729	0.000527056	0.00151519
LINC01135	1.00871	4.84003	0.0010368	0.00276451
AL162595.1	1.00864	6.84832	2.27e-08	1.95e-07
LINC01978	1.00861	4.74068	0.000594784	0.0016876
AC055713.1	1.00815	7.57336	5.78e-16	2.72e-14
SLC2A1-AS1	1.00769	4.74792	0.00372926	0.008568
AL583810.1	1.00761	4.17857	0.000387851	0.00116261
AC107375.1	1.00717	7.11338	5.41e-14	1.71e-12
AC008764.2	1.00624	5.96101	9.38e-05	0.000330017
MIR34AHG	1.00422	4.13138	0.000228378	0.000729245
AC027807.2	1.00395	5.15331	0.00080497	0.00220929
HOXB-AS1	1.00384	5.96941	0.000345976	0.00105034
AC098820.3	1.00374	4.11535	5.8e-05	0.000214334
AL512306.2	1.00344	6.03231	1.31e-05	5.71e-05
CYP1B1-AS1	1.0034	6.46846	2.98e-05	0.00011783
AC253576.2	1.00339	4.14706	0.000407493	0.00121208
AL358933.1	1.00221	3.85545	0.000344149	0.00104582
AC016747.2	1.0021	3.94007	0.00402175	0.00913469
BREA2	1.00043	4.98793	4.23e-06	2.1e-05
AC016876.3	1.00037	3.86992	0.000455395	0.001341
GAS1RR	-1.004	4.58436	0.000909	0.00246632
AF064858.1	-1.00545	5.18591	0.000291944	0.000902717
AC244153.1	-1.01155	6.06036	1.34e-06	7.66e-06
AC010531.3	-1.01842	3.6489	0.0021188	0.00518413
F11-AS1	-1.01849	10.7337	3.38e-06	1.73e-05
AC024909.2	-1.0197	5.7272	4.96e-06	2.42e-05
AP001646.3	-1.02169	3.80639	0.00178762	0.00447665
AC100810.1	-1.02173	10.6332	2.74e-11	4.81e-10
AC114810.1	-1.02322	7.73489	8.22e-08	6.31e-07
AL391807.1	-1.02379	3.6103	0.00234474	0.00566516
AC018467.1	-1.02492	8.73432	0.000146991	0.000494613
AC010336.2	-1.02804	6.73782	4.66e-05	0.000176504
FAM3D-AS1	-1.03091	4.50543	0.000304705	0.000936552
AL512791.2	-1.03338	6.24702	2.27e-08	1.95e-07
AP001043.1	-1.03356	9.42599	0.00226429	0.0054858
AL355096.1	-1.037	7.27437	0.00357677	0.00826994
AC012629.2	-1.03881	4.12415	6.67e-05	0.000241996
AC093110.1	-1.03964	6.82662	0.000268515	0.000841646
XXYLT1-AS2	-1.04406	3.78492	0.00044829	0.00132197
AC006369.1	-1.04627	4.78047	1.25e-05	5.45e-05
DHCR24-DT	-1.0472	5.87949	4.97e-05	0.000186914
AC009137.2	-1.04746	5.16449	4.38e-07	2.8e-06
AL031722.1	-1.0479	5.79604	1.05e-06	6.14e-06
AC118754.1	-1.04846	5.40435	2.41e-05	9.77e-05
MAGI2-AS3	-1.05087	11.7099	0.000296117	0.000913334
AC044849.1	-1.05249	3.89898	0.000639133	0.00179562
AC015922.3	-1.05984	6.96888	8.7e-08	6.62e-07
LINC01428	-1.06454	5.57611	0.000464945	0.00136134
NPHP3-AS1	-1.06921	3.85271	0.00102074	0.00272757
LINC00310	-1.07012	5.48062	4.23e-07	2.71e-06
PRKCQ-AS1	-1.07148	7.02677	6.2e-07	3.87e-06
GK-IT1	-1.07562	4.15937	0.00112715	0.002967
LINC02246	-1.08405	5.08573	2.31e-07	1.57e-06
AC036176.1	-1.08418	9.09403	1.28e-10	1.89e-09
AC092375.2	-1.09005	4.55853	0.000343338	0.00104387
ITGA6-AS1	-1.09101	4.63153	6.66e-07	4.12e-06
LINC02453	-1.09136	8.61566	5.53e-06	2.65e-05
AC008125.1	-1.09251	4.54439	0.00104575	0.00278298
AP001781.1	-1.09516	8.18604	2.01e-06	1.09e-05
BX664727.3	-1.10042	4.23077	8.87e-05	0.000313723
LINC01847	-1.10383	3.95	0.000528776	0.00151872
AC098820.2	-1.10393	3.51245	0.00435882	0.00982445
DSG2-AS1	-1.10593	5.8922	4.97e-07	3.14e-06
AC009119.1	-1.10662	5.18249	3.83e-06	1.93e-05
LINC02520	-1.10834	4.06317	0.00135817	0.00350492
ROCR	-1.10942	4.24039	0.0012454	0.00324234
AL133264.2	-1.10963	3.74753	0.00171455	0.00431552
LINC00891	-1.11114	3.48626	0.00145298	0.00371699
AC009509.4	-1.11175	5.51529	1.52e-07	1.09e-06
ADAMTS9-AS2	-1.11655	5.67371	1.28e-07	9.28e-07
AP001269.2	-1.11972	3.93367	0.00387275	0.00884505
AL450384.1	-1.12129	5.01058	0.000205779	0.000665953
AC104794.4	-1.12228	4.59051	5.37e-05	0.000199839
MAFTRR	-1.1243	6.52031	6.52e-05	0.000237327
AL355581.1	-1.12504	3.83945	0.000251343	0.000795489
AL021578.1	-1.12656	6.52662	1.01e-05	4.52e-05
AC103591.3	-1.12866	4.16914	1.11e-05	4.91e-05
AL138995.1	-1.13229	4.0856	0.000100603	0.000351601
MMP2-AS1	-1.13913	4.95382	0.00247154	0.00592749
AC019193.3	-1.13984	3.94824	3.64e-05	0.000141013
AL024508.2	-1.14055	6.45913	7.62e-06	3.52e-05
AC027117.2	-1.14127	10.0347	5.83e-05	0.000214886
AL445686.2	-1.14251	5.17736	3.68e-05	0.000142156
AP006216.2	-1.14387	7.46177	4.36e-05	0.000165944
AC009159.3	-1.14394	8.04761	1.1e-08	1.03e-07
AL117336.2	-1.14737	5.64555	5.55e-11	8.74e-10
AC011365.1	-1.15224	5.46258	3.5e-05	0.000135957
AC002553.2	-1.15465	5.46975	2.7e-06	1.42e-05
AC096564.1	-1.15465	5.65718	4.98e-07	3.15e-06
U91319.1	-1.15605	8.6277	0.00214856	0.00523828
AC002091.1	-1.15944	4.67383	6.36e-06	3e-05
AL078590.3	-1.16123	6.8419	0.000154909	0.000518994
LINC02207	-1.16708	3.96151	0.00285577	0.00678314
AC046158.1	-1.16846	4.53895	0.000947341	0.00255687
ARHGEF26-AS1	-1.16982	7.05804	1.12e-07	8.29e-07
AC092296.3	-1.17454	4.51087	2.9e-05	0.000115128
AP000253.1	-1.1788	5.60424	3.14e-06	1.62e-05
AC007298.2	-1.18127	7.49727	0.000459506	0.00134925
AC023590.1	-1.18244	4.68375	2.94e-06	1.53e-05
AC037198.2	-1.18523	4.85328	0.00269941	0.00643513
AC025259.3	-1.18652	5.34193	2.44e-05	9.84e-05
AC129507.3	-1.18698	6.47112	2.8e-07	1.85e-06
AL133279.1	-1.18767	4.44171	7.34e-05	0.000264409
SNX29P2	-1.19119	6.09121	7.45e-08	5.77e-07
AC115619.1	-1.19314	13.4215	1.63e-07	1.15e-06
AL360007.1	-1.19562	5.31588	0.000126757	0.000432892
AC015922.2	-1.19921	5.72674	9.43e-08	7.11e-07
AC025031.1	-1.20115	4.67001	9.67e-05	0.000339409
AC112496.1	-1.20165	5.49671	2.16e-05	8.85e-05
AC004921.1	-1.20274	5.54104	1.74e-08	1.55e-07
AL034397.3	-1.20274	6.33155	9.43e-08	7.11e-07
AC010247.1	-1.20388	4.1344	7.3e-05	0.000263136
AC254562.2	-1.20489	6.27969	0.000434288	0.00128313
LINC02037	-1.20666	9.08538	5.77e-05	0.000213727
LINC01814	-1.20791	6.67932	0.00152797	0.00389592
AC084117.1	-1.20793	4.40683	3.66e-05	0.000141581
AP000919.2	-1.20803	4.04232	4.69e-05	0.000177486
B4GALT1-AS1	-1.20861	8.61611	1.32e-14	4.8e-13
UNQ6494	-1.21022	6.8784	3.49e-05	0.000135769
AC079766.1	-1.21059	5.13985	2.52e-08	2.14e-07
AL445190.1	-1.21218	3.58165	0.000640578	0.00179886
AC087273.1	-1.21298	5.42069	3.26e-06	1.68e-05
AL049775.1	-1.21707	3.99262	0.000381227	0.00114498
LINC02362	-1.21904	10.9404	9.12e-05	0.000321927
LINC00261	-1.22052	15.2117	1.73e-09	1.98e-08
MIR503HG	-1.22166	7.289	1.72e-08	1.53e-07
AC008759.3	-1.23276	4.61429	1.57e-06	8.71e-06
AC105105.2	-1.23734	8.74321	4.19e-08	3.4e-07
AP001065.1	-1.2415	8.79441	6.65e-08	5.2e-07
AC007384.1	-1.24181	4.72714	5.4e-05	0.000200799
AC069294.1	-1.24566	4.41112	0.00318626	0.00746198
AL161645.1	-1.24859	7.45043	0.000535631	0.00153556
LINC02593	-1.25326	7.64407	0.000627249	0.00176786
AC092378.1	-1.25915	4.27719	1.02e-05	4.58e-05
LINC01714	-1.26058	5.95441	2.69e-05	0.000107357
SFTPD-AS1	-1.26359	3.4427	0.000100006	0.000349851
AL359715.3	-1.26898	8.40042	1.29e-13	3.82e-12
AL357055.3	-1.27023	6.55055	1.11e-13	3.32e-12
AL157935.1	-1.27437	7.40966	3.22e-05	0.000126636
AC007364.1	-1.28568	6.72243	8.79e-12	1.79e-10
AC037198.1	-1.2874	5.10307	0.000284193	0.000882564
AC107294.1	-1.30004	3.58802	0.000385949	0.00115747
LINC01679	-1.30197	7.06104	7.1e-08	5.52e-07
Z99289.1	-1.31042	5.33778	0.000317005	0.000970493
FGF14-AS2	-1.31495	8.7653	2.82e-11	4.92e-10
SOCS2-AS1	-1.31681	8.76198	5.36e-09	5.5e-08
AC007344.1	-1.31785	4.20014	0.000346289	0.00105077
AL157832.2	-1.325	4.83972	0.0003293	0.00100515
AC007278.1	-1.32882	4.1621	0.000770396	0.00212478
AC103740.1	-1.33257	9.93745	9.67e-07	5.71e-06
GNG12-AS1	-1.34149	6.93595	4.15e-14	1.36e-12
SMIM25	-1.34209	8.57996	6.56e-07	4.07e-06
AL080248.1	-1.34499	8.39825	5.53e-05	0.000205392
AC012613.2	-1.35224	4.40824	0.000683594	0.00191011
AC106795.2	-1.35571	7.11486	0.000203255	0.000659512
AC009831.3	-1.36491	3.83124	4.36e-06	2.16e-05
AC092747.1	-1.36931	3.65773	0.000650324	0.00182457
AL365361.1	-1.37212	7.49347	4.49e-07	2.86e-06
AL139095.4	-1.37324	4.11119	2.2e-08	1.91e-07
AC025165.1	-1.37533	4.34094	3.97e-05	0.000152549
LINC01550	-1.37567	5.91784	6.32e-06	2.98e-05
LINC01010	-1.376	6.75587	0.000265911	0.000835178
AC135279.3	-1.38282	3.48575	0.000147532	0.000496163
VIPR1-AS1	-1.38409	4.55312	2.68e-06	1.41e-05
AGAP1-IT1	-1.38848	7.66538	3.1e-06	1.6e-05
AL353148.1	-1.40076	3.90875	0.000245645	0.000779054
AC009831.1	-1.40144	7.03808	2.33e-18	2.15e-16
AL445307.1	-1.4024	3.74604	5.3e-06	2.56e-05
AC129507.4	-1.40285	3.60522	1.16e-05	5.09e-05
AC068875.1	-1.40324	4.32905	1.83e-05	7.69e-05
AC129507.2	-1.40652	7.91764	9.09e-09	8.78e-08
LINC01831	-1.4099	9.17557	0.000400178	0.00119492
AL161740.1	-1.41353	6.91523	6.22e-11	9.68e-10
AC018755.4	-1.41364	6.08608	2.43e-05	9.83e-05
AC108058.1	-1.41424	4.24215	6.47e-07	4.03e-06
LINC01018	-1.42278	13.6804	0.000175533	0.000578368
AL391095.2	-1.42931	10.0591	1.24e-08	1.15e-07
AC009093.5	-1.43584	6.52571	0.000175427	0.000578328
AC022784.5	-1.43777	5.19303	2.09e-05	8.6e-05
AC018742.1	-1.44425	4.59136	8.85e-07	5.29e-06
LINC02518	-1.44562	3.6269	1.5e-05	6.42e-05
AC091588.3	-1.44743	4.69221	3.14e-08	2.63e-07
DNM3OS	-1.44859	7.6488	9.26e-10	1.13e-08
AC106822.1	-1.45154	5.99244	1.02e-06	5.98e-06
GK-AS1	-1.45958	5.93074	7.76e-07	4.71e-06
AC108748.1	-1.46168	5.42529	1.97e-08	1.73e-07
POU6F2-AS1	-1.46719	6.92673	0.0010681	0.00283329
AC020978.4	-1.47063	8.73974	6.62e-08	5.18e-07
AC119424.1	-1.47156	6.47799	1.44e-06	8.12e-06
AP001198.2	-1.47172	4.16872	0.00387252	0.00884505
LINC01625	-1.47563	6.98803	1.45e-05	6.23e-05
AL391425.1	-1.47637	3.45104	1.06e-05	4.73e-05
LINC01348	-1.47699	11.7725	3.89e-06	1.96e-05
AC024600.1	-1.4784	5.3738	6.07e-06	2.89e-05
AC027449.1	-1.48933	4.13664	1.27e-07	9.28e-07
TMEM220-AS1	-1.49406	10.3813	1.1e-17	8.67e-16
HID1-AS1	-1.50425	5.22623	1.95e-11	3.57e-10
LINC00582	-1.50575	3.74098	0.000217271	0.000698025
AC062004.1	-1.50688	4.51616	2.07e-05	8.53e-05
AC087521.1	-1.50749	5.31478	1.43e-06	8.07e-06
AP001107.5	-1.51244	4.60321	1.4e-06	7.94e-06
LINC01979	-1.51692	7.13294	3.71e-05	0.000143294
LINC01554	-1.52169	12.9241	0.000594616	0.0016876
LINC01537	-1.5239	6.33114	4e-12	8.92e-11
AL159972.1	-1.52781	3.50356	0.000184134	0.000605056
AL590079.1	-1.52894	5.64005	1.07e-05	4.75e-05
STEAP3-AS1	-1.53278	5.63426	1.5e-13	4.34e-12
AC015908.3	-1.54026	8.98642	5.68e-18	4.74e-16
AC011374.1	-1.54349	3.61872	0.000266405	0.000836306
AP000851.2	-1.54861	7.59327	0.00414292	0.00938231
LY6E-DT	-1.54968	8.18815	2.8e-05	0.000111514
MANCR	-1.55065	5.56755	1.07e-05	4.78e-05
AP000439.2	-1.55372	3.99181	0.00313276	0.00736181
MIR3945HG	-1.55695	5.39333	3.01e-06	1.56e-05
AC010890.1	-1.56455	4.23649	2.23e-08	1.93e-07
AC112206.2	-1.57916	10.4354	2.59e-05	0.000103829
LINC00402	-1.57926	6.03271	1.59e-07	1.13e-06
AC246817.2	-1.58041	3.54621	1.57e-06	8.72e-06
LINC02388	-1.59819	5.7828	2.22e-07	1.52e-06
AC105046.1	-1.60424	3.93998	1.97e-05	8.18e-05
AC099684.1	-1.60656	7.53616	8.27e-08	6.34e-07
AC104129.1	-1.60976	3.6866	6.13e-05	0.000223861
AL358216.1	-1.61046	3.70384	1.21e-05	5.29e-05
AC015712.6	-1.61152	3.8038	0.000142918	0.000482749
LINC02156	-1.61374	5.19247	1.57e-05	6.68e-05
AC105460.2	-1.61572	3.71547	6.15e-07	3.83e-06
AC105053.1	-1.62379	3.805	3.69e-06	1.87e-05
FLJ34503	-1.62521	3.60995	7.16e-05	0.000258446
AL590426.2	-1.62533	3.76847	0.000303503	0.000933786
FGF14-IT1	-1.63233	3.86034	0.00181003	0.00452178
AC008549.1	-1.63316	11.2715	1.47e-06	8.29e-06
LINC00707	-1.63515	4.49455	0.000633924	0.00178321
AP003716.1	-1.63592	10.6454	2.86e-07	1.88e-06
AC025470.2	-1.63959	3.46898	8.1e-05	0.000289653
LINC02580	-1.65873	6.04233	1.61e-10	2.29e-09
AC004540.2	-1.66321	8.00002	9.24e-05	0.000325828
LINC01370	-1.66479	9.84238	0.00105352	0.00279821
AC110995.1	-1.66693	6.20811	3.16e-15	1.33e-13
AL035661.1	-1.66868	9.60218	7.25e-07	4.44e-06
AL109933.1	-1.6807	4.42955	1.43e-05	6.16e-05
AC063977.6	-1.68953	4.31603	2.02e-09	2.27e-08
AC116025.1	-1.6949	6.23778	2.47e-08	2.1e-07
AC008250.2	-1.70588	4.88525	2.68e-10	3.64e-09
AL139385.1	-1.71657	8.54347	3.13e-07	2.05e-06
DIO3OS	-1.71676	9.09129	1.9e-06	1.03e-05
PCAT18	-1.72843	4.87584	5.61e-07	3.52e-06
LINC02275	-1.72863	7.12135	1.39e-05	6.01e-05
AC010175.1	-1.72977	4.73159	1.56e-07	1.11e-06
AC005224.3	-1.73313	5.28661	3.55e-08	2.94e-07
AC010547.2	-1.73518	7.31725	0.000281812	0.000876654
U91324.1	-1.74021	8.44043	1.68e-14	5.82e-13
LINC00844	-1.74058	11.5038	3.87e-06	1.94e-05
LINC00399	-1.74325	4.74907	1.52e-07	1.09e-06
AL121790.1	-1.74644	4.12393	7.04e-06	3.28e-05
LINC01702	-1.75047	10.8417	6.57e-07	4.07e-06
AL161668.4	-1.77635	9.24843	6.21e-10	7.88e-09
AC138356.1	-1.77917	8.14895	4.25e-11	6.91e-10
LINC01595	-1.78162	9.61065	8.35e-05	0.000297937
AC016395.1	-1.78206	5.88595	1.24e-11	2.39e-10
AL355073.2	-1.79178	3.50935	2.86e-07	1.88e-06
AC245884.11	-1.7935	3.56806	6.16e-06	2.91e-05
AC129507.1	-1.79763	6.66204	2.93e-14	9.79e-13
AC078942.1	-1.80311	4.12719	3.13e-07	2.05e-06
DBET	-1.8393	4.06331	0.000103923	0.000360961
AL358613.2	-1.85789	4.37178	5.91e-06	2.81e-05
LINC00885	-1.86369	8.10976	1.44e-05	6.18e-05
AC019257.1	-1.87418	5.84392	6.69e-08	5.22e-07
AC011747.1	-1.87773	4.66685	2.29e-07	1.56e-06
AP003774.3	-1.88024	4.35262	1.01e-14	3.79e-13
AC015712.1	-1.88466	3.55847	2.4e-07	1.62e-06
AC100849.1	-1.88627	4.35341	6.3e-11	9.78e-10
AP000785.1	-1.89039	3.80456	1.79e-06	9.84e-06
KBTBD11-OT1	-1.9047	5.15859	3.67e-08	3.02e-07
AC090227.2	-1.91169	4.91978	5.03e-07	3.18e-06
NCOA7-AS1	-1.91985	5.00936	2.11e-08	1.85e-07
RBMS3-AS3	-1.92053	4.37951	2.8e-11	4.9e-10
LINC01612	-1.92445	7.50291	0.000908197	0.00246522
AC011611.3	-1.92893	3.99786	1.28e-07	9.28e-07
LINC01767	-1.93649	10.6179	2.37e-13	6.63e-12
FAM99B	-1.94549	9.29052	1.23e-06	7.1e-06
AC003988.1	-1.95081	3.85772	1.7e-08	1.52e-07
WARS2-IT1	-1.9524	4.95153	3.66e-11	6.04e-10
AC026904.2	-1.95522	3.47312	3e-09	3.27e-08
AC105384.1	-1.95802	4.00911	8.25e-08	6.34e-07
AP002954.1	-1.96562	5.02083	5.42e-12	1.16e-10
CPS1-IT1	-1.97488	5.95707	1.49e-06	8.38e-06
CCDC26	-1.97778	4.00959	3.35e-10	4.49e-09
AC092809.2	-1.97837	5.79521	2.72e-08	2.29e-07
FAM99A	-1.98157	12.1869	1.42e-05	6.12e-05
AC099508.2	-2.00992	7.28721	1.36e-08	1.25e-07
AC007991.3	-2.01431	3.93989	1.72e-06	9.5e-06
LINC02153	-2.03559	4.61899	1.96e-07	1.36e-06
AC004160.2	-2.04269	5.58866	3.32e-11	5.59e-10
PITPNM2-AS1	-2.05138	4.6773	4.82e-05	0.000181818
LINC02428	-2.06383	10.6052	5.8e-10	7.39e-09
TMEM26-AS1	-2.09794	4.14368	1.84e-09	2.09e-08
LINC01561	-2.15267	4.03596	1.09e-08	1.03e-07
AC012409.1	-2.16076	7.65721	3.9e-19	4.46e-17
AC008080.1	-2.17391	3.95128	3.55e-11	5.88e-10
AC004160.1	-2.20623	8.29566	1.88e-12	4.46e-11
AP006285.2	-2.20923	6.04327	7.87e-10	9.75e-09
AC008556.1	-2.21218	7.59965	8.28e-35	2.56e-31
AL392089.1	-2.21574	4.31417	1.13e-11	2.22e-10
AL603840.1	-2.22059	3.78061	1.99e-08	1.75e-07
LINC01818	-2.23761	5.39885	3.85e-13	1.04e-11
LINC02005	-2.24959	3.46533	2.95e-07	1.94e-06
AC010280.1	-2.25219	5.00186	1.76e-12	4.17e-11
AC134312.6	-2.2571	4.0122	1.59e-10	2.27e-09
AC104024.1	-2.27971	3.53808	1.21e-10	1.79e-09
AC079061.1	-2.28959	8.87612	1.25e-09	1.47e-08
GTSCR1	-2.30453	3.47547	3.85e-08	3.15e-07
HAO2-IT1	-2.33724	5.5475	9e-12	1.82e-10
LINC00551	-2.36275	3.68769	1.47e-06	8.24e-06
HAND2-AS1	-2.37891	8.80601	3.35e-11	5.62e-10
AC015468.4	-2.38263	4.02098	1.94e-12	4.58e-11
AC096577.1	-2.40908	5.17815	0.00115396	0.00302852
AC104809.1	-2.43018	10.4455	2.88e-05	0.000114312
HTR2A-AS1	-2.4397	4.22567	1.49e-20	2.42e-18
AC010969.1	-2.46751	6.90794	8.94e-08	6.77e-07
AC022167.4	-2.49374	5.87617	8.03e-11	1.23e-09
AL021328.1	-2.49647	8.15544	1.02e-08	9.75e-08
LINC02027	-2.50528	8.96304	2.17e-08	1.89e-07
AP000439.3	-2.51854	5.06484	1.43e-13	4.17e-12
AF165147.1	-2.52472	6.50984	1.75e-18	1.66e-16
AC092155.1	-2.52597	5.26043	6.7e-18	5.52e-16
ERVE-1	-2.54229	5.05631	3.17e-09	3.43e-08
AC004053.1	-2.57032	3.59512	2.49e-05	0.000100478
AC092384.2	-2.58357	8.09998	3.75e-11	6.17e-10
B3GALT5-AS1	-2.58922	5.11467	3.96e-10	5.18e-09
AC026369.3	-2.6021	5.56709	7.86e-12	1.62e-10
AC010280.2	-2.62161	7.81635	2.4e-15	1.04e-13
CLRN1-AS1	-2.63049	5.5976	7.69e-09	7.5e-08
LINC00683	-2.67391	5.12874	2.56e-14	8.73e-13
AC245128.3	-2.6818	5.34061	1.66e-14	5.81e-13
AC015468.1	-2.70782	4.22762	3.11e-19	3.63e-17
FENDRR	-2.80642	6.86211	2.54e-22	6.04e-20
LINC01726	-2.84263	3.95348	3.3e-13	8.99e-12
LINC01507	-2.86756	4.23604	1.46e-06	8.24e-06
LINC01863	-2.88039	5.25246	1.41e-18	1.36e-16
AC091729.2	-2.93744	5.56511	1.26e-07	9.24e-07
PCDH9-AS2	-3.04336	6.18632	1.93e-10	2.71e-09
LINP1	-3.0536	5.07161	7.54e-13	1.95e-11
AC016999.1	-3.09551	5.06187	2.21e-17	1.55e-15
AC104809.2	-3.15622	7.32051	2.41e-25	9.32e-23
AC093725.2	-3.16915	3.97121	4.49e-17	2.86e-15
LINC01920	-3.19734	3.72801	9.04e-07	5.4e-06
AC087477.4	-3.23327	3.87311	1.4e-15	6.21e-14
PCA3	-3.23954	3.87147	2.55e-11	4.53e-10
LINC01727	-3.29709	6.07772	1.46e-16	8.14e-15
LINC01093	-3.42745	11.7654	3.39e-16	1.72e-14
AC026461.2	-3.50411	5.11713	3.53e-17	2.34e-15
LINC00907	-3.57781	7.20903	3.68e-16	1.83e-14
AC010776.2	-3.68737	4.5541	4.11e-30	2.96e-27
AC087392.1	-3.76383	8.16184	3.16e-22	7.24e-20
AL390778.2	-3.89475	5.54775	2.18e-08	1.89e-07
AC107396.1	-4.43606	5.82254	4.31e-30	2.96e-27
AC006960.2	-4.45618	4.95187	2.85e-15	1.21e-13

## Sheet: edgerOutmirna
	logFC	logCPM	PValue	FDR
hsa-mir-891a	8.89081	5.60853	6.59e-23	4.86e-21
hsa-mir-767	8.78115	3.51044	1.28e-22	8.48e-21
hsa-mir-105-2	8.32338	3.16274	1.15e-21	6.93e-20
hsa-mir-105-1	8.26997	3.20653	2.28e-20	9.47e-19
hsa-mir-3923	8.09227	3.76939	7.45e-15	1.37e-13
hsa-mir-520c	6.67037	1.10894	2.69e-12	3.5e-11
hsa-mir-520f	6.6286	2.00603	9.15e-12	1.01e-10
hsa-mir-552	6.4566	6.30886	2.3e-19	7.62e-18
hsa-mir-892a	6.41432	0.629355	4.41e-10	3.49e-09
hsa-mir-4652	6.30889	0.648853	2.06e-17	5.95e-16
hsa-mir-522	6.26863	1.91761	3.69e-12	4.62e-11
hsa-mir-520a	6.24583	3.3795	8.74e-12	9.88e-11
hsa-mir-512-1	6.22481	1.77595	3.38e-12	4.32e-11
hsa-mir-518e	6.16008	1.91308	7.42e-11	6.75e-10
hsa-mir-512-2	6.14754	1.74182	3.72e-11	3.78e-10
hsa-mir-520b	6.04075	2.15983	1.21e-10	1.03e-09
hsa-mir-519c	5.96421	0.952669	7.45e-12	8.84e-11
hsa-mir-518a-1	5.93927	1.19749	1.03e-09	7.54e-09
hsa-mir-519a-2	5.93617	2.60504	4.08e-11	4.04e-10
hsa-mir-518f	5.92275	1.39139	9.18e-11	8.13e-10
hsa-mir-520e	5.88095	0.529097	5.05e-11	4.79e-10
hsa-mir-521-1	5.85854	0.571413	1.12e-09	8.08e-09
hsa-mir-1269b	5.82988	5.2944	1.27e-11	1.38e-10
hsa-mir-516a-1	5.79681	2.1095	4.84e-11	4.66e-10
hsa-mir-520g	5.78549	1.08998	1.01e-09	7.48e-09
hsa-mir-527	5.74914	1.19442	2.51e-09	1.7e-08
hsa-mir-1269a	5.73454	8.6189	3.94e-21	2.01e-19
hsa-mir-518b	5.69463	2.40043	1.27e-10	1.07e-09
hsa-mir-466	5.67631	1.47247	1.05e-10	9.2e-10
hsa-mir-520h	5.63604	0.563168	3.97e-10	3.18e-09
hsa-mir-516b-1	5.53508	0.747616	3.36e-10	2.72e-09
hsa-mir-525	5.44662	2.00482	6.45e-09	4.04e-08
hsa-mir-526b	5.34782	3.58825	6.97e-09	4.28e-08
hsa-mir-519a-1	5.3048	2.31059	1.62e-10	1.34e-09
hsa-mir-888	5.02187	-0.416702	5.99e-09	3.79e-08
hsa-mir-1251	5.00091	0.560065	1.16e-14	2.09e-13
hsa-mir-519d	4.98876	0.6821	4.72e-09	3.01e-08
hsa-mir-1323	4.9686	0.933131	1.64e-09	1.14e-08
hsa-mir-520d	4.95728	0.25329	2.62e-09	1.76e-08
hsa-mir-518a-2	4.91659	1.03794	3.49e-08	1.91e-07
hsa-mir-517c	4.89727	0.516135	1.47e-09	1.03e-08
hsa-mir-498	4.78237	-0.0938658	9.91e-09	5.98e-08
hsa-mir-519b	4.74778	-0.561749	2.91e-09	1.93e-08
hsa-mir-516a-2	4.72426	1.48967	8.53e-09	5.19e-08
hsa-mir-524	4.54597	-0.262924	1.23e-08	7.32e-08
hsa-mir-518c	4.43944	1.80531	3.72e-07	1.74e-06
hsa-mir-891b	4.43638	-0.692444	2.05e-07	1.02e-06
hsa-mir-515-2	4.40577	-0.183639	1.99e-08	1.14e-07
hsa-mir-9-1	4.36611	8.74356	3.62e-24	6.01e-22
hsa-mir-9-3	4.35418	8.74733	5.14e-24	6.82e-22
hsa-mir-9-2	4.3388	8.75066	8.53e-24	9.44e-22
hsa-mir-135a-2	4.33792	1.47364	1.65e-15	3.42e-14
hsa-mir-516b-2	4.29088	0.000480132	8.1e-08	4.23e-07
hsa-mir-615	4.24398	-0.356722	2.8e-08	1.58e-07
hsa-mir-523	4.24153	0.170625	2.29e-08	1.3e-07
hsa-mir-515-1	4.16134	-0.266368	4.96e-07	2.25e-06
hsa-mir-183	4.09072	11.4027	2.54e-33	8.44e-31
hsa-mir-10b	4.03114	14.0368	6.35e-40	4.22e-37
hsa-mir-196a-2	3.85601	1.83592	1.15e-09	8.22e-09
hsa-mir-34c	3.84493	1.80543	1.89e-15	3.69e-14
hsa-mir-196a-1	3.81909	1.79373	5.12e-10	4e-09
hsa-mir-3937	3.81522	-0.769472	2.92e-06	1.16e-05
hsa-mir-96	3.63235	2.97582	6.17e-23	4.86e-21
hsa-mir-217	3.59219	10.2811	3.58e-16	8.2e-15
hsa-mir-517a	3.55095	1.96529	8.58e-06	3.13e-05
hsa-mir-517b	3.54137	1.95726	8.94e-06	3.23e-05
hsa-mir-182	3.54044	12.7757	4.93e-28	1.09e-25
hsa-mir-216b	3.48635	4.76216	1.54e-14	2.63e-13
hsa-mir-1283-2	3.46083	-0.699735	1.52e-05	5.27e-05
hsa-mir-135a-1	3.4393	1.10338	4.46e-13	6.3e-12
hsa-mir-216a	3.436	5.05861	2.61e-14	4.23e-13
hsa-mir-3144	3.398	-0.47909	7.92e-11	7.11e-10
hsa-mir-561	3.24202	-0.442756	8.3e-07	3.65e-06
hsa-mir-34b	3.16406	-0.110962	3.7e-09	2.41e-08
hsa-mir-203b	3.03857	1.1106	7.52e-07	3.33e-06
hsa-mir-137	2.97822	-0.614324	1.28e-06	5.5e-06
hsa-mir-190b	2.78293	0.0366612	2.96e-11	3.07e-10
hsa-mir-3189	2.75526	-0.642424	6.06e-08	3.22e-07
hsa-mir-2114	2.71923	1.04428	1.17e-10	1.01e-09
hsa-mir-1295a	2.70237	1.48808	3.3e-08	1.83e-07
hsa-mir-196b	2.65175	5.18252	7.02e-15	1.33e-13
hsa-mir-802	2.64287	1.8592	2.66e-05	8.82e-05
hsa-mir-224	2.64056	6.35113	4.57e-17	1.12e-15
hsa-mir-184	2.46238	1.67643	6.07e-07	2.72e-06
hsa-mir-6718	2.44293	3.3869	6.7e-06	2.51e-05
hsa-mir-452	2.25944	7.41597	3.49e-17	9.27e-16
hsa-mir-4746	2.2502	1.28972	4.29e-19	1.36e-17
hsa-mir-200c	2.22388	7.49861	1.86e-07	9.26e-07
hsa-mir-3591	2.12191	1.30031	3.78e-12	4.65e-11
hsa-mir-3662	2.11617	-0.434399	2.86e-06	1.14e-05
hsa-mir-760	2.09886	0.127725	4.36e-13	6.3e-12
hsa-mir-1266	2.07675	2.59813	1.87e-14	3.1e-13
hsa-mir-3677	1.9891	2.35378	2.03e-19	7.09e-18
hsa-mir-765	1.98588	-0.485981	7.4e-08	3.9e-07
hsa-mir-4661	1.96054	2.49893	8.61e-14	1.36e-12
hsa-mir-1270	1.95287	0.787907	1.45e-09	1.02e-08
hsa-mir-202	1.90844	-0.097243	0.000445642	0.00122783
hsa-mir-5003	1.89759	-0.426498	1.07e-08	6.41e-08
hsa-mir-5683	1.88553	1.35035	2.13e-07	1.05e-06
hsa-mir-372	1.86944	0.367616	0.00025406	0.000736662
hsa-mir-3131	1.84209	-0.586455	0.000266373	0.000765678
hsa-mir-147b	1.76741	-0.376599	0.00013447	0.0004022
hsa-mir-944	1.76287	1.33212	2.27e-07	1.11e-06
hsa-mir-1180	1.73393	4.24928	2.56e-21	1.42e-19
hsa-mir-211	1.6976	0.766059	0.000236933	0.000693056
hsa-mir-3200	1.68958	1.09752	6.19e-10	4.73e-09
hsa-mir-937	1.65003	1.40243	6.54e-09	4.06e-08
hsa-mir-31	1.63355	0.679021	0.00200804	0.00476193
hsa-mir-3681	1.61158	-0.393854	0.00325525	0.00713363
hsa-mir-346	1.6041	-0.570394	0.000582215	0.00153409
hsa-mir-551b	1.60284	2.7134	0.000191464	0.000567555
hsa-mir-5187	1.58364	0.237496	1.87e-11	2e-10
hsa-mir-21	1.56365	17.213	4.4e-20	1.62e-18
hsa-mir-6516	1.53748	-0.158709	9.77e-07	4.27e-06
hsa-mir-3682	1.51569	1.0153	7.86e-10	5.93e-09
hsa-mir-541	1.49709	-0.12829	1.71e-05	5.88e-05
hsa-mir-577	1.48691	-0.275346	0.00259414	0.00587886
hsa-mir-4664	1.47387	-0.265592	6.19e-06	2.33e-05
hsa-mir-301b	1.44568	0.535119	4.62e-07	2.12e-06
hsa-mir-7706	1.43638	1.03007	2.04e-11	2.15e-10
hsa-mir-1276	1.3959	-0.754198	0.000127233	0.000385051
hsa-mir-421	1.3807	2.3926	2.51e-13	3.87e-12
hsa-mir-581	1.3593	-0.0997523	2.02e-06	8.26e-06
hsa-mir-4739	1.35894	-0.297519	0.000451001	0.00123746
hsa-mir-221	1.32635	6.55312	1.28e-15	2.78e-14
hsa-mir-499a	1.31906	1.25224	0.000560474	0.00148269
hsa-mir-939	1.30994	0.243896	4.47e-08	2.4e-07
hsa-mir-3187	1.30912	-0.805334	0.00193352	0.00461283
hsa-mir-504	1.26697	0.871719	2.21e-06	8.99e-06
hsa-mir-589	1.26256	6.10424	5.13e-21	2.43e-19
hsa-mir-1304	1.25276	0.766048	0.000416312	0.0011518
hsa-mir-1292	1.24621	-0.357771	2.08e-05	7.03e-05
hsa-mir-6716	1.24425	-0.623778	0.00051529	0.00138494
hsa-mir-135b	1.23849	1.22028	0.00286788	0.00642957
hsa-mir-34a	1.23224	8.12025	5.39e-11	5.04e-10
hsa-mir-3610	1.22525	-0.117381	8.56e-05	0.000268148
hsa-mir-877	1.19935	0.658564	5.98e-10	4.62e-09
hsa-mir-222	1.17171	4.66487	5.7e-11	5.26e-10
hsa-mir-3691	1.16875	-0.488195	8.96e-05	0.000279278
hsa-mir-1226	1.15542	0.258565	6.15e-06	2.33e-05
hsa-mir-3127	1.14375	1.55933	2.19e-09	1.5e-08
hsa-mir-1301	1.13191	3.11497	1.92e-10	1.57e-09
hsa-mir-330	1.12749	4.21725	4.72e-11	4.61e-10
hsa-mir-1229	1.11527	-0.234028	9.96e-05	0.000304896
hsa-mir-204	1.04653	5.54025	0.000517266	0.00138494
hsa-mir-3928	1.04535	1.05088	1.9e-06	7.85e-06
hsa-mir-940	1.02409	1.08713	9.5e-06	3.41e-05
hsa-mir-6875	1.00669	-0.334407	0.00459337	0.00983871
hsa-mir-151a	0.991275	11.4796	7.13e-18	2.15e-16
hsa-mir-500a	0.98971	7.83521	1.3e-15	2.78e-14
hsa-mir-93	0.980437	11.6298	1.68e-12	2.23e-11
hsa-mir-532	0.963206	9.9882	7.62e-13	1.05e-11
hsa-mir-3074	0.953854	2.60107	1.69e-06	7.04e-06
hsa-mir-3684	0.952462	-0.74904	0.00186565	0.00447218
hsa-mir-7-2	0.950961	-0.556853	0.00386631	0.00838964
hsa-mir-5586	0.923362	1.45114	0.000398947	0.00110837
hsa-mir-146b	0.908401	10.6862	0.00052101	0.00138936
hsa-mir-548s	0.903523	0.00692005	0.00343831	0.00751
hsa-mir-30d	0.899315	13.3939	7.99e-10	5.96e-09
hsa-mir-6788	0.899276	-0.149992	0.000508186	0.00137451
hsa-mir-643	0.889554	0.00671521	0.000466935	0.0012759
hsa-mir-338	0.879521	8.5205	0.000230857	0.000681285
hsa-mir-501	0.871756	5.34383	5.31e-12	6.41e-11
hsa-mir-181b-2	0.867154	6.54957	2.45e-06	9.84e-06
hsa-mir-130b	0.860328	5.43764	1.75e-05	6e-05
hsa-mir-25	0.834648	13.0151	2.58e-13	3.89e-12
hsa-mir-181b-1	0.826676	6.62973	3.57e-06	1.4e-05
hsa-mir-548o	0.805886	-0.371411	0.000656733	0.0017236
hsa-mir-4326	0.802299	1.79347	0.00136723	0.00338748
hsa-mir-188	0.761831	2.05327	1.21e-06	5.2e-06
hsa-mir-128-2	0.755653	6.46232	8.64e-08	4.48e-07
hsa-mir-6755	0.755551	0.457341	0.000127577	0.000385051
hsa-mir-3909	0.754497	0.321336	0.000509231	0.00137451
hsa-mir-502	0.732914	3.50268	4.24e-08	2.29e-07
hsa-mir-652	0.724711	4.38831	8.8e-06	3.19e-05
hsa-mir-106b	0.71098	8.81065	3.36e-13	4.96e-12
hsa-mir-769	0.709389	4.24559	3.75e-11	3.78e-10
hsa-mir-92b	0.696062	3.7591	0.00156661	0.00378266
hsa-mir-548o-2	0.691879	-0.42447	0.00410503	0.00887863
hsa-mir-320a	0.691563	8.71256	6.92e-06	2.58e-05
hsa-mir-132	0.687438	6.28113	7.02e-06	2.6e-05
hsa-mir-320b-2	0.682068	1.42746	0.00193822	0.00461283
hsa-mir-18a	0.679448	3.58157	0.000355161	0.000999266
hsa-mir-128-1	0.678223	6.96205	1.56e-07	7.88e-07
hsa-mir-5010	0.673936	0.129973	0.00248333	0.00566642
hsa-mir-1307	0.673397	10.787	1.58e-06	6.71e-06
hsa-mir-766	0.661302	3.91977	7.53e-05	0.000236977
hsa-mir-425	0.657094	7.23249	5.16e-06	1.97e-05
hsa-mir-149	0.653755	3.50407	0.00315048	0.00692687
hsa-mir-500b	0.650139	2.40389	3.34e-06	1.31e-05
hsa-mir-181d	0.640495	2.6103	0.0015623	0.00378266
hsa-mir-212	0.640434	2.40003	0.0012781	0.00319045
hsa-mir-95	0.631055	2.84718	0.000826009	0.00212585
hsa-mir-660	0.620235	5.65684	9.34e-05	0.000289697
hsa-mir-550a-2	0.619282	1.54718	0.000321904	0.000913436
hsa-mir-3615	0.614926	2.97138	0.000129501	0.000389089
hsa-mir-942	0.612057	2.21183	9.62e-05	0.000296966
hsa-mir-550a-1	0.610986	1.54007	0.000347814	0.00098276
hsa-mir-143	0.606841	16.1532	0.00124533	0.00312037
hsa-mir-103a-1	0.602985	13.2287	1.77e-07	8.89e-07
hsa-mir-103a-2	0.601031	13.2327	1.56e-07	7.88e-07
hsa-mir-671	0.594966	2.39462	2.67e-05	8.84e-05
hsa-mir-140	0.593119	10.4286	1.36e-07	6.98e-07
hsa-mir-625	0.569262	5.74317	0.00368553	0.00802358
hsa-mir-324	0.563658	5.15797	7.68e-06	2.83e-05
hsa-mir-148b	0.558471	7.65518	4.5e-07	2.09e-06
hsa-mir-3613	0.552636	4.26306	0.00433756	0.00932085
hsa-mir-15b	0.537836	7.92206	0.000281881	0.000806764
hsa-mir-664a	0.51472	5.49993	0.000714271	0.00185264
hsa-mir-98	0.503486	6.02189	0.000664283	0.00172974
hsa-mir-301a	0.503145	2.50603	0.00311793	0.00688795
hsa-mir-185	0.497995	6.6211	1.42e-05	4.97e-05
hsa-mir-99b	0.494063	13.6142	0.00217734	0.00507283
hsa-mir-4677	0.490235	3.72483	0.000233467	0.000685937
hsa-mir-32	0.464552	6.27737	0.00220541	0.00511153
hsa-mir-423	0.448928	7.16254	3.73e-06	1.45e-05
hsa-mir-584	0.44644	5.65555	0.00114905	0.00290101
hsa-mir-361	0.443927	8.9596	1.08e-06	4.68e-06
hsa-mir-454	0.427506	2.46598	0.00253586	0.00576647
hsa-mir-1306	0.414768	3.50714	0.0031224	0.00688795
hsa-mir-365a	0.412199	7.16696	0.00264913	0.00596279
hsa-mir-365b	0.41043	7.15743	0.00287588	0.00642957
hsa-mir-107	0.404016	7.02726	0.0010895	0.00276119
hsa-mir-484	0.388268	6.22036	0.00135082	0.00335933
hsa-let-7d	0.37166	8.97389	0.00220947	0.00511153
hsa-mir-574	-0.386039	7.46607	0.00243087	0.00558511
hsa-mir-30b	-0.434456	9.53996	0.00302187	0.00673329
hsa-mir-30c-1	-0.460071	8.53957	0.000787031	0.00203342
hsa-mir-30e	-0.47586	14.5762	5.64e-05	0.00017837
hsa-mir-576	-0.483823	4.08333	0.000397785	0.00110837
hsa-mir-30c-2	-0.496596	8.76058	0.00038912	0.00109019
hsa-mir-27b	-0.507071	11.5714	4.81e-05	0.000153484
hsa-mir-29c	-0.52594	11.7795	0.00170092	0.00409207
hsa-mir-3199-2	-0.574621	0.687243	0.000997375	0.00254714
hsa-mir-4668	-0.598486	0.929875	0.000661655	0.00172968
hsa-mir-26b	-0.603613	10.8521	1.24e-05	4.37e-05
hsa-mir-195	-0.606757	6.12778	0.00417462	0.00899984
hsa-mir-497	-0.611265	4.86294	0.00207491	0.0048856
hsa-mir-381	-0.611471	5.78941	0.00244989	0.0056094
hsa-mir-503	-0.626864	3.056	0.000494466	0.0013456
hsa-mir-455	-0.67248	10.3428	0.000250468	0.000729432
hsa-mir-1271	-0.676988	1.40867	0.00151499	0.00369491
hsa-mir-1248	-0.706812	1.05279	0.00206522	0.00488009
hsa-mir-4772	-0.71486	3.20186	0.000532106	0.00141327
hsa-mir-4521	-0.730573	-0.452939	0.00209589	0.00491757
hsa-mir-654	-0.73768	5.487	0.00144102	0.00355265
hsa-mir-376b	-0.745967	1.63916	0.00212844	0.00497635
hsa-mir-505	-0.759629	6.81569	2.3e-06	9.31e-06
hsa-mir-125b-2	-0.764562	8.95495	3.32e-05	0.000106908
hsa-mir-376a-1	-0.764736	1.44133	0.00260621	0.00588613
hsa-mir-125b-1	-0.778628	8.81678	2.79e-05	9.17e-05
hsa-mir-10a	-0.790407	14.4251	1.11e-05	3.97e-05
hsa-mir-299	-0.792339	2.3399	0.000264176	0.000762665
hsa-mir-378a	-0.800788	10.9344	1.34e-05	4.7e-05
hsa-mir-4442	-0.801209	-0.523186	0.0030574	0.00678968
hsa-mir-378d-1	-0.807899	0.616058	0.000961159	0.00246413
hsa-mir-99a	-0.813761	10.2682	0.000106246	0.000323612
hsa-mir-758	-0.822544	4.73234	0.000155132	0.000461918
hsa-let-7c	-0.831048	12.0424	3.19e-05	0.000103167
hsa-mir-1275	-0.852603	-0.275999	0.00151914	0.00369491
hsa-mir-337	-0.854993	5.42036	4.9e-05	0.000155817
hsa-mir-145	-0.859939	10.7486	3.29e-06	1.3e-05
hsa-mir-7850	-0.873774	-0.746208	0.00221705	0.00511153
hsa-mir-223	-0.944156	7.59877	6.5e-07	2.9e-06
hsa-mir-542	-0.944192	8.59883	1.67e-08	9.72e-08
hsa-mir-101-2	-0.956914	14.0846	8.11e-12	9.44e-11
hsa-mir-4286	-0.957241	-0.786798	0.0014446	0.00355265
hsa-mir-101-1	-0.958209	14.0712	8.78e-12	9.88e-11
hsa-mir-369	-0.959532	4.16194	9.96e-05	0.000304896
hsa-mir-136	-0.974877	5.29618	2.95e-05	9.63e-05
hsa-mir-376a-2	-0.979172	0.666839	0.000313433	0.000893216
hsa-mir-486-1	-0.981092	6.86077	1.77e-05	6.02e-05
hsa-mir-376c	-0.983655	3.45248	4.76e-05	0.00015254
hsa-mir-3653	-0.988566	3.10748	3.23e-07	1.52e-06
hsa-mir-4732	-0.991059	0.189119	0.00103689	0.00263791
hsa-mir-627	-0.991853	1.28629	3.1e-09	2.04e-08
hsa-mir-486-2	-1.00552	6.84881	1.15e-05	4.1e-05
hsa-mir-3614	-1.01642	2.81331	3.03e-05	9.85e-05
hsa-mir-4777	-1.01816	-0.256922	2.55e-05	8.51e-05
hsa-mir-511	-1.0507	4.62468	1.69e-08	9.77e-08
hsa-mir-378c	-1.05743	4.78732	4.41e-09	2.84e-08
hsa-mir-142	-1.07853	11.1239	4.03e-08	2.19e-07
hsa-mir-411	-1.0827	3.94703	5.13e-06	1.97e-05
hsa-mir-33b	-1.08728	4.276	1.66e-06	6.96e-06
hsa-mir-6087	-1.14106	-0.732625	0.00147067	0.00360342
hsa-mir-451a	-1.14366	10.3047	2.38e-05	8.02e-05
hsa-mir-551a	-1.14864	-0.522033	0.00123669	0.00311046
hsa-mir-214	-1.15274	4.59053	8.32e-06	3.05e-05
hsa-mir-144	-1.15461	7.97612	2.82e-07	1.34e-06
hsa-mir-3607	-1.22726	7.47693	2.5e-05	8.39e-05
hsa-mir-378d-2	-1.22968	0.791684	4.64e-07	2.12e-06
hsa-mir-199b	-1.2605	10.7977	5.08e-07	2.29e-06
hsa-mir-6503	-1.29117	0.183649	2.74e-07	1.31e-06
hsa-mir-199a-2	-1.29584	10.6115	2.33e-07	1.13e-06
hsa-mir-199a-1	-1.29689	9.92971	2.38e-07	1.14e-06
hsa-mir-4800	-1.37026	-0.419922	4.38e-06	1.69e-05
hsa-mir-450a-2	-1.37188	2.99059	1.64e-12	2.23e-11
hsa-mir-450a-1	-1.38047	2.95707	1.44e-14	2.52e-13
hsa-mir-450b	-1.39088	4.20237	2.47e-17	6.84e-16
hsa-mir-665	-1.45696	-0.0998852	1.34e-08	7.88e-08
hsa-mir-6502	-1.47945	-0.285383	2.98e-08	1.66e-07
hsa-mir-4683	-1.53676	-0.70391	1.52e-05	5.27e-05
hsa-mir-130a	-1.56337	6.40337	5.63e-23	4.86e-21
hsa-mir-621	-1.65439	0.0232875	1.59e-06	6.71e-06
hsa-mir-139	-1.71378	8.18476	1.04e-20	4.59e-19
hsa-mir-23c	-1.77458	0.0842607	1.7e-06	7.04e-06
hsa-mir-424	-1.79358	8.66613	3.07e-20	1.2e-18
hsa-mir-1258	-3.02016	3.1045	1.88e-15	3.69e-14
hsa-mir-4686	-3.32298	-0.0704496	3.89e-17	9.93e-16
hsa-mir-490	-3.49966	2.31744	4.75e-17	1.13e-15
