# Supplementary material for: Co-expression analysis and ceRNA network reveal eight novel potential lncRNA biomarkers in hepatocellular carcinoma
Source: PeerJ. 2019 Dec 2;7:e8101. doi: 10.7717/peerj.8101 (PMC6894432; doi:10.7717/peerj.8101)
Supplement: Table S3 [file peerj-07-8101-s003.xls]

## Sheet: lnc_atrix
name	TCGA-BC-A10Q-01A-11R-A131-07	TCGA-BC-A10Q-11A-11R-A131-07	TCGA-BC-A10R-01A-11R-A131-07	TCGA-BC-A10R-11A-11R-A131-07	TCGA-BC-A10T-01A-11R-A131-07	TCGA-BC-A10T-11A-11R-A131-07	TCGA-BC-A10U-01A-11R-A131-07	TCGA-BC-A10U-11A-11R-A131-07	TCGA-BC-A10W-01A-11R-A131-07	TCGA-BC-A10W-11A-11R-A131-07	TCGA-BC-A10X-01A-11R-A131-07	TCGA-BC-A10X-11A-11R-A131-07	TCGA-BC-A10Y-01A-11R-A131-07	TCGA-BC-A10Y-11A-11R-A131-07	TCGA-BC-A10Z-01A-11R-A131-07	TCGA-BC-A10Z-11A-11R-A131-07	TCGA-BC-A110-01A-11R-A131-07	TCGA-BC-A110-11A-11R-A131-07	TCGA-BC-A216-01A-11R-A155-07	TCGA-BC-A216-11A-11R-A155-07	TCGA-BD-A2L6-01A-11R-A213-07	TCGA-BD-A2L6-11A-21R-A213-07	TCGA-BD-A3EP-01A-11R-A22L-07	TCGA-BD-A3EP-11A-12R-A22L-07	TCGA-DD-A113-01A-11R-A131-07	TCGA-DD-A113-11A-12R-A131-07	TCGA-DD-A114-01A-11R-A131-07	TCGA-DD-A114-11A-12R-A131-07	TCGA-DD-A116-01A-11R-A131-07	TCGA-DD-A116-11A-12R-A26B-07	TCGA-DD-A118-01A-11R-A131-07	TCGA-DD-A118-11A-11R-A131-07	TCGA-DD-A119-01A-11R-A131-07	TCGA-DD-A119-11A-11R-A131-07	TCGA-DD-A11A-01A-11R-A131-07	TCGA-DD-A11A-11A-11R-A131-07	TCGA-DD-A11B-01A-11R-A131-07	TCGA-DD-A11B-11A-11R-A131-07	TCGA-DD-A11C-01A-11R-A131-07	TCGA-DD-A11C-11A-11R-A131-07	TCGA-DD-A11D-01A-11R-A131-07	TCGA-DD-A11D-11A-12R-A131-07	TCGA-DD-A1EB-01A-11R-A131-07	TCGA-DD-A1EB-11A-11R-A131-07	TCGA-DD-A1EC-01A-21R-A131-07	TCGA-DD-A1EC-11A-11R-A131-07	TCGA-DD-A1EE-01A-11R-A131-07	TCGA-DD-A1EE-11A-11R-A131-07	TCGA-DD-A1EG-01A-11R-A213-07
LINC02082	0	0	0.0212993	0	0	0	0.0873282	0	0.0431803	0	0	0.017806	0	0	0	0	0	0.0261199	0.247853	0	0	0	0.467798	0	0.262419	0	0.38214	0	0	0	0.019528	0	0	0	0.0452427	0	0.0231514	0	0	0	0	0	0	0	0	0	0	0.0384305	0.0444059
AC090241.2	0	0	0	0	0	0	0.00605853	0	0	0	0	0	0	0	0	0	0	0	0	0	0	0	0	0	0	0	0	0	0	0	0.00541914	0	0	0	0	0	0	0	0.00278532	0	0.00633312	0	0	0	0	0	0	0	0
EHD4-AS1	0	0.0254012	0.0588425	0.0395383	0.25446	0.056481	0.0402095	0.0450181	0.139174	0.0702203	0.0549322	0.0163972	0.188092	0	0.133659	0.0696362	0.0427027	0	0.0912974	0.021566	0.0990031	0.021185	0.0923115	0	0.018589	0	0.131965	0.0820293	0.0506605	0.019789	0.0539489	0	0.0948336	0	0.0416632	0	0.234517	0	0.0739428	0	0.210159	0.125636	0.119803	0.0191541	0.0193099	0	0.0594006	0	0.265802
AC007114.2	0.109372	0.0137241	0	0	0.0163671	0	0.0506916	0	0.0322264	0.00421552	0.00659546	0.0118124	0.150556	0.0126771	0.0240717	0.00418045	0	0	0.0369956	0.00776799	0.00713211	0.0190769	0.0554171	0	0.0468698	0.00982289	0.0316888	0.0147733	0	0.0142558	0.113354	0.00632927	0	0.00410746	0.0187587	0	0.0691136	0.00655846	0.0499386	0.00906274	0.00756986	0.00905072	0.034522	0.00689923	0.0139107	0.00867417	0.0356598	0.0254947	0
AC092839.2	0	0	0	0.0404298	0	0	0.246696	0	0	0	0	0.167669	0.256444	0.0479846	0.0390492	0.0474708	0	0	0	0.0441044	0	0.0866506	0.0629285	0	0	0	0	0	0	0.0404702	0	0	0	0	0.0426025	0	0.0872017	0	0	0	0	0.102775	0.0490016	0	0	0	0	0	0
LINC00636	0	0.0154939	0	0	0	0	0.0367898	0	0.0121274	0	0	0.0100018	0	0	0	0	0.0260473	0	0	0	0	0	0.018769	0	0	0	0.0268314	0	0	0	0	0	0	0	0	0	0	0	0	0	0	0	0	0	0	0	0.04831	0	0.0124716
AL031728.1	0.0985434	0.0158002	0.0183008	0.0184454	0.0282644	0	0.00625283	0.035003	0.0123671	0.0072798	0.0227795	0.040798	0	0.00729737	0.00593851	0	0.0664054	0	0.0141973	0.00670729	0.00615824	0.0461216	0.14355	0.0256045	0.0173442	0	0.0273618	0.0637803	0	0.0123092	0.0167788	0	0	0.0141864	0	0.0226915	0.0066307	0	0.0172479	0	0.0522898	0.0234446	0	0	0.0300281	0.0224692	0	0.0110067	0
LINC01224	0	0.0118837	0	0	0.0212583	0.00660601	0.329203	0	1.24176	0	0	0	0.659979	0.00548853	0.41985	0	0.00998901	0	0.453821	0.141252	0.134321	0.0049556	0.0287913	0	0.00434834	0	1.51259	0.00959414	0.0296263	0	0.0799249	0	0	0	0.00487292	0	0.089768	0	0.00864835	0	0.127817	0	0.0840728	0	0.130992	0	0.00463166	0	0.0430451
AC127002.1	0.0447416	0	0.0332363	0	0	0.0957074	0	0	0	0	0	0.111141	0.0354138	0	0.0970653	0.039333	0	0.0815171	0.116028	0	0.0671045	0	0.0521408	0	0.0314992	0	0	0	0.0429223	0.0335325	0.0304722	0	0.040174	0	0	0	0	0	0.0313241	0	0	0	0	0.0649134	0	0	0.0335516	0.0599685	0
DNM3-IT1	0	0	0	0	0	0	0.156573	0.087649	0	0	0	0	0	0	0.0371757	0	0	0	0.0444383	0.0419883	0	0.0824932	0	0	0	0	0.0856437	0	0	0	0	0	0	0.0444041	0	0	0	0.0709009	0.0359911	0	0	0.0489219	0	0	0.0375958	0.0468865	0.0771008	0	0
AC007861.1	0	0.0290568	0.067311	0	0	0	0	0	0	0	0	0	0	0	0	0	0	0	0	0	0	0	0	0	0	0	0	0	0	0	0.041142	0	0	0.026089	0	0.020865	0	0.0416569	0	0	0	0	0	0.0219107	0	0.0550952	0	0	0
CASC23	0	0	0	0	0	0	0	0	0	0	0	0	0	0	0.0188376	0	0	0	0	0	0	0	0	0	0	0	0	0	0	0	0	0	0	0	0.0102759	0	0	0	0.00911867	0	0	0	0	0	0	0.0118791	0	0	0
AC005324.5	0.0356522	0	0	0	0	0.0762642	0.0814401	0	0.134229	0.0316053	0.0247243	0	0.0282194	0	0.0257821	0	0	0	0.215732	0	0.0534721	0.0286053	0.0415483	0	0.0753001	0.0736459	0	0.0553805	0	0	0.0242817	0.0474529	0.0320126	0.0307951	0.112512	0	0.0575745	0	0.0499211	0	0	0.0339283	0	0.103452	0.104294	0.0650335	0.29409	0.0955715	0.331294
AC092301.1	0.0266458	0.0769017	0.138557	0.0199503	0.0550268	0	0	0.0227153	0.0802565	0	0.0184785	0	0	0	0.250498	0.0234247	0	0.0242737	0.0691004	0.0435272	0.0799282	0.128275	0.0931573	0.055387	0.0750373	0.0275208	0.133174	0.0827809	0	0.0998513	0.0181477	0	0.0239256	0	0.0420449	0.0184071	0.0645452	0	0.11193	0.101564	0.042417	0.10143	0.0967203	0.0193296	0.116921	0	0.139871	0.0357142	0.0619009
AC245008.1	0	0	0	0	0	0	0	0	0	0	0	0	0.0338514	0	0.0309277	0	0	0	0.0369697	0	0	0	0	0	0	0	0	0	0.0820573	0	0	0	0	0	0	0	0	0	0.0299422	0	0	0	0.0388101	0	0	0	0	0	0
AL135937.1	0	0	0.0207442	0	0.0192229	0	0.021263	0	0	0	0	0	0	0	0	0	0	0	0.0241393	0	0	0.0448111	0	0	0	0	0.0465225	0	0	0.0209291	0.019019	0	0.0501486	0	0	0	0	0.0385141	0	0	0	0	0	0	0.0204224	0	0	0	0
LINC02292	0.0837754	0.057567	0.0355615	0.0268819	0.0247152	0	0.136691	0	0.342447	0.0212188	0.0497974	0.0371613	0.473641	0.0850802	0.294258	0.0105212	0.0193555	0.0109025	0.548308	0.0586503	0.583368	0.0288071	0.209207	0.0373154	0.370731	0.0247218	0.0797529	0.0743616	0.1837	0.0717568	0.138567	0.0318585	0.128954	0.0206749	0.122748	0	0.463845	0.0990362	0.100547	0.0228087	0.114309	0.0569461	0.141186	0.0434092	0	0.0545769	0.0987217	0.0962458	0.0185351
LINC00705	0.0466646	0	0.00866621	0	0	0	0.0266489	0	0	0.0103419	0.0161806	0	0.00923396	0	0	0.0205117	0.037735	0	0.0100846	0.0190572	0.00874859	0	0	0	0	0.0120492	0	0	0	0.00874343	0.00794548	0	0	0	0	0	0	0	0	0	0	0.011102	0	0	0.00853177	0.0106402	0	0.0156365	0.00903386
AL606490.3	0	0	0	0	0	0	0	0	0	0	0	0	0	0	0	0	0	0	0	0	0	0	0	0	0	0	0	0.0585598	0	0.0565085	0	0	0.0677006	0	0	0	0	0	0	0	0	0	0	0.109391	0	0	0	0	0
AC116351.1	7.08008	0.118113	0.495109	0.0306416	0.136835	0.0937971	0.0178067	0.0647928	0.00440236	0.0259142	0.239212	0.130707	0.00462759	0.0571488	0.0126837	0.071956	0.0850988	0.047934	0.176885	0.171909	0.00438434	0.21578	0.0476934	0.0425344	0.0164642	0.138884	0.730505	0.308776	0.0504787	0.227851	0.059728	0.0311265	0.0419969	0.10605	0.00461262	0.0565429	0.0141621	0.129014	0.0204659	0.178277	0.0279207	0.150222	0.00530545	0.114512	0.0171028	0.159969	0.0438425	0.172397	0.0407458
AC103810.5	0.0363525	0	0.0270045	0	0.0500482	0	0.11072	0	0.0273732	0.0322261	0	0	0.143868	0.0323039	0.0262885	0	0	0	0.157121	0.0296917	0	0	0	0	0.255931	0.0375462	0	0	0	0	0	0	0	0	0.0573613	0	0.0587054	0.0501371	0.0254509	0	0.0578689	0	0.0329885	0	0.0531712	0.0331555	0.190825	0.0487244	0.0281501
AC087741.2	1.42029	0	0.263765	0.0886164	0.733265	0.506359	0.991328	0.302695	0.980343	0.839378	0.164158	0.147003	2.34204	0.946579	0.684724	0.728346	0.191417	0.107821	1.22774	0.483354	0.887575	0.284889	1.10344	0.246021	0.166653	0.122244	1.9718	0.643477	2.0438	0.17741	0.886706	0.787663	1.80666	0.102233	1.21392	0.0817618	0	0.652948	0.24859	0.225567	0.565231	0	1.28885	0.429296	0.432789	0	0.710045	0.158638	0.458258
AC023830.2	0	0.0353507	0	0.00917089	0.00843171	0.0131007	0.0186531	0.0313258	0	0.0217168	0.0169887	0.00760666	0	0	0	0	0	0.0111583	0	0	0	0	0	0	0.00862342	0.012651	0	0	0	0	0.00834228	0	0	0	0.00966375	0	0.0098902	0	0.0085755	0.0233439	0	0.0116565	0.0111153	0.0177711	0.00895785	0.022343	0	0	0
AC015468.3	0	0	0.0725301	0	0.0336055	0.208858	0	0.0416175	0	0	0.0338551	0.0303172	0.154564	0.0867635	0.070607	0.0429172	0.0789539	0	0.0844009	0	0	0.117508	0	0.0507382	0	0	0	0.151666	0	0	0.0332491	0.0649775	0	0.0421679	0.0770319	0	0.0394185	0.0673304	0.0341786	0	0.155427	0	0.39871	0.283315	0.071405	0.0445253	0	0	0
COLCA1	1.10028	0.035881	0.0484863	0.0244347	0.0208606	0.0349053	0.25027	0.0337829	2.45917	0.101258	0.0549636	0.0550104	0.0941001	0.0973593	0.0859727	0.206979	0.0452405	0.0488421	0.741545	0.0990065	0.0489472	0.0299254	0.28796	0.0872188	0.398798	0.0625986	0.559229	0.0869043	0.169959	0.0803659	3.88178	0.0496427	0.175822	0.070473	0.0588523	0.0660236	0.112934	0.0610854	0.00816013	0.0222132	0.126168	0.0310572	0.158653	0.0794786	0.119335	0.0659085	0.0751673	0.0624887	0.0794251
AP001029.1	0	0	0	0.0907263	0	0	0.276799	0	0.182488	0.10742	0.0840332	0	0	0	0	0.213053	0	0	0.523737	0	0.0908707	0.0972241	0	0	0	0	0	0	0.116248	0	0	0	0	0	0.0956021	0	0	0	0.0848362	0	0	0	0	0	0.0886187	0	0	0.162415	0
AL357315.1	0	0	0	0	0	0	0	0	0	0	0	0	0.063438	0	0	0	0	0	0	0	0	0	0	0	0	0	0	0	0	0	0.0545861	0	0	0	0.0632329	0	0	0	0.0561121	0	0	0	0	0	0	0	0	0	0
AC005046.1	0.423434	0.156674	0.24196	0.317034	0.0896864	0.069675	0.644832	0.19437	0.539581	0.202122	0.203293	0.101138	0.0773436	0.20261	0.188436	0.200441	0.368746	0.0890167	0.675747	0.0798114	0.293113	0.287472	0.379585	0.067705	0.0687942	0.302773	0.379847	0.177085	0.499959	0.14647	0.554595	0.086706	0.08774	0.140672	0.642446	0.157506	0.263	0.224614	0.22804	0.124152	0.259253	0.247975	0.118231	0.0708854	0.786084	0.207951	0.244255	0.130971	0.176558
AP005242.3	0	0	0	0	0	0	0	0	0	0	0	0	0.0523158	0	0	0	0	0	0	0	0.0495659	0	0	0	0	0	0	0	0	0	0	0	0	0	0	0	0	0	0	0	0	0	0	0	0	0	0	0	0
AL080312.2	0	0	0.024004	0	0	0	0	0	0	0	0	0.0200671	0	0	0	0.0284071	0	0	0	0	0	0.0518528	0.0376572	0	0	0	0.107666	0.0250971	0.0309994	0.0726537	0	0	0	0.0279111	0	0	0.234822	0	0	0	0	0	0	0	0	0.0294715	0	0	0.0750671
AC022150.3	0	0	0	0	0	0.0247425	0.035229	0	0	0	0.0160427	0	0.0732421	0	0.0669162	0	0	0	0	0	0.0346961	0	0.0539183	0	0	0.0477861	0.308317	0	0	0	0	0	0.0415436	0	0	0	0	0	0.016196	0	0	0	0	0	0	0	0	0.0620129	0
AL135924.2	0	0.705252	0.0837813	0.802212	0	0.301571	0.128815	0.384587	1.27388	1.74967	0.117321	0.385221	0.0892701	0.451002	1.2234	0.148724	0.638411	0.770574	1.31616	0.230296	0.253733	0.271473	0.197153	0.234436	1.90566	0.815409	0.0939471	0.613175	0.0540987	0.338112	0.0768137	0.675514	0.607618	0.0487092	0.222454	0.545381	0.0910666	0.15555	0	0.214945	0.179538	0.590315	0.102347	0	0.247445	0.0514323	0.21144	0.151167	0.174671
IGSF11-AS1	0	0	0	0	0	0	0.00966381	0	0	0.011251	0	0	0	0	0	0	0	0	0	0	0	0.0203661	0	0	0	0	0	0	0	0	0	0	0	0	0	0	0.0102478	0	0	0	0	0	0	0	0	0	0	0	0
AC018648.1	0.121901	0	0	0	0.0839132	0	0.278457	0.0259798	0.0229476	0.0270159	0.0211341	0	0.120608	0.0270811	0.0440765	0.0267912	0	0	0.237093	0.0248913	0.0914149	0.0244516	0.106545	0	0.107276	0.0629518	0.0507708	0	0.087708	0.0228402	0	0	0.027364	0	0	0	0.0738212	0	0	0	0	0.0290016	0	0	0.0222873	0.027795	0.0914129	0	0.0471979
AC009133.2	0	0	0	0	0	0	0	0	0	0	0	0	0	0	0	0	0	0	0	0	0	0	0	0	0	0	0	0	0	0	0	0	0	0	0	0	0	0	0	0	0	0	0	0	0	0	0	0	0
AC006458.1	0	0	0	0	0.0214602	0	0	0	0	0	0	0	0	0	0	0.0274066	0	0	0.0538976	0	0	0	0	0	0.0658443	0	0.0519371	0	0	0	0	0	0	0	0	0	0.0251723	0	0	0	0	0	0.0282903	0	0	0	0.0467564	0	0
LINC00592	0.214494	0.0187589	0.0144852	0	0.0402687	0	0	0	0	0	0	0	0	0	0	0	0	0	0.0168559	0	0	0	0	0	0.0274562	0	0	0	0	0.0146143	0.0132805	0	0	0	0.0307685	0	0	0	0	0	0	0	0	0	0.0142605	0	0	0	0
ENTPD1-AS1	0.0763728	0.045334	0.0398343	0.0352825	0.134229	0.0364976	0.0334068	0.0374019	0.0856505	0.020167	0.0642323	0.0575199	0.169776	0.0592032	0.0434784	0.035713	0.0551883	0.025165	0.0491631	0.0265443	0.0231529	0.0664923	0.0549168	0.032088	0.134993	0.0285313	0.0974567	0.0466964	0.0218243	0.0340999	0.0641892	0.0324421	0.0116725	0.036493	0.0525629	0.0224506	0.102341	0.0627514	0.0864614	0.0402593	0.0620816	0.0479378	0.0545596	0.0188605	0.110519	0.0474255	0.120636	0.0457375	0.0352326
LINC01181	0	0	0	0	0	0	0	0	0	0	0	0	0	0	0	0	0	0	0	0	0	0.0587541	0	0	0	0	0.0609981	0	0	0	0.0249368	0	0	0	0	0	0	0	0	0	0	0	0	0	0.0267769	0	0	0	0
ACOXL-AS1	0.0237266	0.00570638	0.00881266	0.00444115	0	0.0126885	0.0135496	0.00505667	0.00893298	0.0105167	0.0123405	0.0257855	0.11268	0.0105421	0.0300265	0.0104292	0.0191864	0.00540359	0.030765	0.00484481	0.0578268	0.00951844	0.0207378	0.0184946	0.00835205	0.0122529	0	0.0138209	0	0.0133368	0.0121196	0.00789499	0.0106522	0	0.00935965	0.00409762	0.0191579	0.00818088	0.0332226	0	0	0.0169345	0.0484447	0.0172119	0.00433798	0.00540998	0	0.00795037	0.00459326
AC104463.1	0	0	0	0	0	0	0	0	0	0	0	0	0	0	0	0	0	0	0	0	0	0	0	0	0	0	0	0	0	0	0	0	0	0	0	0	0	0	0	0	0	0	0	0	0	0	0	0	0
AC092447.4	0	0	0	0	0	0	0	0	0	0	0	0	0	0	0.0218745	0	0	0	0	0	0	0	0	0	0	0	0	0	0	0	0	0	0	0	0	0	0	0	0	0	0	0	0	0	0	0	0	0	0
GFOD1-AS1	0	0.117978	0.0455498	0	0.168837	0	0.046689	0	0.0461717	0	0.0425228	0	0.0485339	0.0544885	0.0443421	0.0539051	0.099168	0	0	0	0.0919656	0	0.071458	0	0.086338	0.063331	0	0.190496	0	0.0459557	0	0	0	0	0.096754	0	0	0	0.0858583	0	0	0	0.0556433	0	0.0448432	0.0559249	0.0919636	0.0821858	0
AC013652.1	0.0125586	0.0241632	0.0606394	0.0235071	0.00864497	0.00671605	0.678935	0.0321181	0.018913	0.0389656	0.052255	0.0233972	0.0149105	0.0334797	0.0227045	0.182167	0.0406216	0	0.607936	0.0102575	0	0.0554195	0.0731772	0.0587355	0.0707322	0	0.0836889	0.0731546	0.0361437	0.0188245	0.128299	0.0167154	0.00563824	0.0216953	0.0445868	0.0130133	0.258579	0.0346413	0	0.0359015	0.069971	0.0358539	0.0341892	0.0409963	0.0367377	0.0114541	0.0282529	0.0336652	0.213948
Z98885.3	0.0463459	0.0780251	0.0860702	0.0347001	0.0478549	0.0123924	0.0705783	0	0.0959698	0.0513564	0.0160701	0.0287815	0.0458545	0.0205921	0.0754093	0.0203716	0	0.073885	0.120188	0.056781	0.0260665	0.0743706	0.0540104	0.0481681	0.0326286	0.0239339	0	0.0179979	0	0.0260511	0.0157824	0.0462646	0	0.010008	0.0457062	0.016008	0.0187109	0.0159799	0.0405591	0.0220817	0.0368885	0.0441049	0.0315428	0.00840512	0.050841	0.0422699	0.0173773	0.0310594	0.0179443
AL512306.3	0.0596118	0.14337	0.0221413	0.0892651	0.102588	0.0318791	0.136171	0	0.134662	0	0.0206699	0.0185099	0.0235919	0.0529727	0.193988	0	0	0	0.206121	0	0	0.0717437	0.382086	0.0309778	0.0839363	0.0307846	0.0496558	0.0231496	0	0.0893545	0.1624	0	0	0	0.0470312	0.0411802	0.1444	0.041108	0	0.0568047	0	0.0283647	0.135239	0.0432439	0.0653936	0.0543692	0.447027	0	0.0692419
LINC02453	0.636833	1.7052	0.204998	1.05693	1.51241	0.783298	0.299024	0.86863	0.151851	0.639818	1.11145	1.33805	1.76423	0.716817	0.32237	0.34524	0.377645	0.77352	0.844097	1.2917	4.62446	0.664246	0.210276	0.397123	0.209228	0.416571	0.123777	1.286	1.35425	3.03873	0.542161	1.62461	1.29612	1.34768	0.53593	0.483921	1.55119	1.14181	0.260082	1.9419	0.354817	1.42419	2.3405	1.24733	0.108671	0.561465	0.318372	0.882019	0.41917
AL606763.1	0.528764	0	0.196397	0	0.0303323	0.0471286	0.369066	0	0.298617	0.039062	0.0305575	0.0820926	0	0.0783125	0.0637297	0.193685	0.142527	0	0.03809	0	0	0.247479	0.102702	0.0457962	0.124088	0	0.293636	0.136893	0.0845439	0	0.0300105	0.0586485	0	0	0.0347644	0.0304395	0.106737	0.121544	0.0308495	0	0	0	0.0399861	0	0.161125	0.160754	0.0330432	0.11812	0.0341214
AL133445.2	0.115887	0	0	0.0578445	0.0797732	0.165263	0	0.0329307	0	0.0342441	0	0.0479782	0.0305754	0.0686535	0.0279347	0	0.062474	0	0.100176	0.031551	0.0869048	0.0619873	0	0.0401477	0	0.0797947	0	0.120009	0.0741163	0.0868536	0.026309	0.10283	0.173427	0.100099	0.0304766	0	0.0935722	0.0532766	0.0540891	0	0.0614926	0.036761	0	0	0.0565007	0	0.115871	0	0
AL158151.2	0	0.162525	0.0627491	0.12649	0.0581473	0	0.0643185	0	0	0	0.0585791	0	0.53488	0	0.0610853	0.222778	0	0	0.292076	0	0.126691	0	0.0984401	0	0	0.0872444	0	0	0.0810358	0.0633082	0	0	0	0	0	0.116706	0.0682054	0	0.177417	0	0	0.0803861	0	0	0.0617757	0	0	0	0
DGCR11	1.73783	0.318444	1.87153	0.39241	0.151908	0.167185	0.854152	0.297864	2.27096	0.326046	0.548379	0.268377	0.51673	0.187929	0.977448	0.55775	0.342027	0.326676	0.723297	0.217793	0.517151	0.501666	0.375042	0.258022	0.498452	0.218426	0.38296	0.314223	0.141136	0.241195	0.970666	0.159098	0.206404	0.262092	0.602112	0.279482	0.571675	0.190222	0.489245	0.245333	11.3584	0.315009	0.700895	0.246797	1.4861	0.478014	0.503349	0.258807	1.80141
PSORS1C3	1.68215	0.0660516	0.0255017	0.102813	0.118158	0	14.7427	0.585312	0.336049	0.0304328	0.261877	0.277149	0.760828	0.0915186	0.248256	0.573412	0	0.0938203	0.326431	0.0280394	0.128721	0.13772	0.240041	0	0.797571	0.141827	0.228768	0.0799889	0.658672	0.463122	0.163666	0.0913849	0.524023	0.0889579	0.785453	0.0711452	0.166315	0.047347	0.552794	0.0654259	0	0.0653391	0.0311528	0.124518	0.175743	0	0.437641	0.0460129	1.06334
AC087045.2	0.0202965	0.995812	0.316623	0.683839	0.447091	2.06229	0.231816	1.09006	0.397362	0.557772	0.21113	0.504178	0.915708	0.703407	0.983395	1.23116	0.853458	0.776566	2.01767	1.42568	0.776252	1.10737	0.662287	0.632836	0.0857355	0.859483	0.135254	0.504443	0.447838	0.36508	0.0138234	0.891481	3.59023	0.543474	1.08889	0.378566	0.131107	0.587849	0.355246	0.193408	0.743122	0.888495	0	0.382814	0	0.647904	0.608812	0.952142	1.90175
LINC02201	0	0	0	0	0	0	0	0	0	0	0	0.00531858	0	0	0	0	0	0	0	0	0	0.00687154	0	0	0	0	0	0	0	0	0	0	0	0	0	0	0	0	0	0	0	0	0	0	0.0125267	0	0	0	0.00663192
AC079062.1	0.00593857	0	0.0110287	0	0.132858	0.0381098	1.48994	0.0759386	0	0	0	0	3.51596	0	4.27948	0.00261034	0.00480219	0	0.00513348	0.00485046	0.00890682	0	0.0346034	0	0.0041809	0.0245343	0.0098935	0	0.00854564	0.00222539	0.00404459	0	0	0	0	0	0	0.00409521	1.04981	0.00565893	1.58819	0	0	0	0	0	0.00222666	0.00397982	0.142557
AC127496.4	0	0	0	0	0.0255255	0	0	0	0	0	0	0	0.0293502	0	0.0268152	0	0	0	0	0	0	0	0	0	0	0	0	0	0	0	0	0	0	0	0	0	0	0	0	0	0	0.0352879	0	0	0	0	0	0	0
AL355810.1	0.0368794	0	0	0	0	0	0.0280811	0	0.0833098	0.0326932	0	0	0	0	0	0	0	0	0	0	0.0553126	0	0	0	0.051928	0	0	0.0286434	0.0707596	0	0	0	0.0331144	0	0	0	0.0595562	0.0508637	0	0	0	0	0	0	0	0	0.0553115	0	0.0285581
AP001626.1	0.114127	0.0274482	0.0105974	0.00534058	0	0	0.0108625	0.00608076	0.00537106	0	0.00989318	0	0	0	0	0.037624	0	0	0.0308297	0.011652	0	0.0114461	0.0249377	0	0.0150653	0	0	0.01108	0.0410574	0.0267296	0	0	0.0448333	0	0	0	0.00575947	0.0196754	0	0	0	0	0	0.0155233	0.00521652	0	0	0.019121	0
AL356215.1	0	0	0.0124568	0.0125552	0	0	0.127683	0.0285906	0	0.0148654	0.011629	0.0104137	0.0265457	0	0.509313	0.0294835	0	0.0152761	0	0	0.0251504	0.0403632	0.136794	0	0.0118057	0	0.167619	0.013024	0.257392	0.0251356	0	0	0	0.0289687	0.0132299	0.0231681	0	0	0	0	0	0	0	0	0.20848	0	0.477847	0.0224758	0.103882
AL592464.1	0	0	0	0	0	0	0	0	0	0	0	0	0	0	0	0	0	0	0	0	0	0	0	0	0	0	0	0	0	0	0	0	0	0	0.449263	0	0	0	0	0	0	0	0	0	0	0	0	0	0
Z97832.2	0.0191105	0.0137885	0.0212943	0.0178855	0.075642	0.0153298	0.174615	0	0.0647552	0.00847061	0.00331321	0.00593394	0.0567235	0.0127366	0.0967388	0.0168003	0.0309071	0.0217615	0.119768	0.0273156	0.0429935	0.0766658	0.0946513	0.00993092	0.0504534	0.0049345	0.063675	0.0408173	0.0183334	0.0179034	0.0195234	0.012718	0.00428988	0.0123802	0.0414627	0.0198024	0.0308613	0.0197677	0.0200692	0.0182106	0.0760539	0.0636524	0.0043355	0.00693161	0.05241	0.0261447	0.0895679	0.0384215	0.0332966
AC103563.2	0	0	0	0	0	0	0.0259644	0	0	0	0	0	0	0.0303018	0	0	0	0.0310639	0	0	0	0	0.0397388	0	0	0	0.0568089	0	0.0654259	0	0	0	0	0	0	0	0	0	0	0	0	0	0	0	0.0498759	0	0	0	0
AC009237.15	0.487603	0.312723	0.814987	0.334655	0.587392	0.26076	1.17571	0.0346397	0.917904	0.216127	0.169073	0.201873	1.31865	0.216649	1.55737	0.107165	0.0657161	0.148065	1.01862	0.39826	0.700847	0.358623	0.757655	0.126694	0	0.0839357	0.406167	0.410269	0.506757	0.152268	0.332093	0.108166	0.364854	0.245685	0.480873	0.0842098	0.492141	0.168124	0.540513	0.464642	0.646838	0.154675	0.405608	0.235813	0.297165	0.29648	1.37119	0.544624	0.912492
AC002383.1	0	0	0	0	0	0	0	0	0	0	0	0.0188409	0	0.02696	0	0	0	0	0	0	0	0	0	0	0	0	0	0	0	0	0	0	0	0	0	0	0	0	0	0	0	0	0	0	0	0	0	0	0
AC066612.1	0	0	0	0	0	0	0.0186531	0	0	0	0	0	0	0	0.0177155	0	0	0	0	0	0	0	0.199842	0	0	0	0	0.0190266	0	0	0	0	0	0	0	0	0	0.0337867	0	0	0	0	0	0	0.0537471	0	0.0734824	0	0
AC116612.1	0	0	0	0	0	0	0	0	0	0	0.0251202	0	0	0	0	0	0	0	0	0	0	0	0	0	0	0	0	0	0	0	0	0	0	0	0	0	0	0	0	0	0	0	0	0	0	0	0	0	0
LNCPRESS1	0	0	0	0	0	0.0288008	0.0205036	0.068867	0	0	0.018674	0.0167226	0	0	0	0	0	0.0245306	0	0	0.0201935	0	0	0.0279865	0	0	0	0.0209142	0.0516657	0.0201816	0	0	0	0.0232593	0	0	0.0434855	0	0.0188525	0.0513196	0	0	0	0.136739	0	0.0245596	0	0	0
ZNF460-AS1	0.30343	0.185759	0.143439	0.0826126	0.208873	0.0885099	0.462082	0.0940623	0.124626	0.220081	0.0956475	0.154174	0.196503	0.220612	0.359063	0.1455	0.178449	0.175902	0.977643	0.0675909	0.289604	0.354117	0.482196	0.258022	0.271883	0.199433	0.275731	0.257092	0.132315	0.206738	0.150297	0.257005	0.346759	0.0238266	0.261157	0.0381112	0.111365	0.304355	0.308997	0.210285	0.175645	0.105003	0.550703	0.240127	0.322774	0.150952	0.330969	0.14789	0.341769
AC021035.1	0	0	0	0	0	0	0	0	0	0	0	0	0	0	0	0	0	0	0	0	0	0	0	0	0	0	0	0	0	0.0357313	0	0	0	0	0	0	0	0	0	0	0	0	0	0	0	0	0	0	0
AC012506.3	0	0	0	0.0170875	0	0	0.0173775	0	0.0515549	0	0.0158269	0	0	0	0.08252	0	0	0.0207905	0.0197282	0	0.0171147	0	0	0.0474391	0.0642696	0	0	0	0.0218942	0.0171046	0.0155436	0	0	0	0.12604	0	0	0	0	0	0	0	0.0207103	0	0	0.0624453	0	0	0.0353455
AC092471.1	0	0	0	0.0692819	0	0	0.070458	0	0	0	0	0	0	0.0822281	0	0	0	0	0	0	0	0	0	0	0	0	0.154159	0	0	0	0	0	0	0	0	0	0	0	0	0	0	0	0	0	0	0.0843958	0	0	0
AL390778.1	0	0	0	0	0	0	0	0	0	0	0	0	0	0	0	0	0	0	0	0	0	0	0	0	0	0	0	0	0	0.0289512	0	0	0	0	0.0304766	0	0	0	0	0	0	0	0	0.0280224	0	0	0	0	0
LINC02126	0	0	0	0	0.0157455	0	0	0	0	0	0	0.0142048	0	0	0	0	0.036993	0	0	0	0	0	0.0266562	0	0	0	0.0381066	0	0	0	0	0	0	0	0	0	0	0	0	0	0	0	0	0	0.0501841	0	0	0	0.0177125
AC006064.1	0	0	0.0810136	0	0.0500482	0	0.0830398	0	0.0273732	0.0322261	0	0.0225755	0.143868	0	0.18402	0.127832	0	0	0.0628485	0	0.0272612	0.0583344	0.127093	0.0377818	0.0511861	0.0375462	0.0605624	0.0282342	0	0	0	0.048385	0	0.0314	0.114723	0	0.176116	0	0.0254509	0	0.0578689	0.0691895	0.0989656	0	0.0265856	0	0.109043	0	0
AC004817.1	0	0	0	0	0	0	0	0	0	0	0	0	0.0223485	0	0	0.0248218	0	0	0	0	0	0	0	0	0	0	0	0	0	0	0	0	0	0	0	0	0	0	0	0	0	0	0	0	0	0	0	0	0
AC104009.1	0	0	0	0	0	0	0.0365872	0	0	0	0	0	0.0507105	0	0	0.0281613	0	0.014591	0	0	0	0	0	0	0.0112763	0	0.0533673	0	0	0	0	0	0	0	0.0252733	0	0.0129327	0	0	0	0	0	0	0	0	0	0	0	0
AL356234.2	0.116773	0	0.318065	0	0.0535889	0	0.266743	0	0.791363	0	0.0539869	0.0483452	0	0	0	0.0342189	0.377711	0	0	0	0.116759	0.0312307	0.31753	0.0404547	0.0548073	0	0.453928	0.120927	3.17403	0.0291726	0.159062	0	0.838815	0	0.276387	0.0268892	0	0.375789	0.109006	0	0.247851	0	0	0	0.0853993	0	0.37946	0	1.35637
AC093424.1	0	0	0.0447412	0	0	0	0	0	0.0453521	0	0	0.0374032	0.286034	0.0535213	0.0435549	0	0.194815	0.109735	0.312383	0	0	0	0	0	0	0	0	0.187114	0	0	0	0	0	0.0520237	0	0	0.145895	0.166135	0.463838	0	0	0.114633	0.0546556	0	0	0.0549322	0	0.0807268	0
LINC01481	0.997377	0.604616	0.872844	0.378493	0.884073	0.584521	0.832256	0.396009	0.236622	0.617703	0.341096	0.390298	1.03817	0.46136	1.23503	0.996919	0.44193	0.261374	1.20467	0.435213	0.870895	0.493298	0.605043	0.298198	0.586751	0.225781	0.955991	0.488129	1.49421	0.317433	1.4051	0.781954	0.588859	0.165219	0.344938	0.179327	0.606754	0.376869	0.430444	0.260386	0.217494	0.299047	0.421545	0.297338	0.88928	0.411217	0.491789	0.311313	0.402037
AC116914.1	0	0	0	0	0	0	0	0	0	0	0.0354713	0	0	0	0.0369889	0	0	0	0.309505	0	0.076715	0.0820786	0.0596082	0	0.180052	0	0.0852134	0	0.0490694	0	0	0	0	0	0	0	0	0	0	0	0	0	0.046416	0	0.0374069	0	0	0	0.0396082
AC012499.1	0	0	0.0204083	0	0.11347	0	0.271943	0	0.0206869	0.0243544	0.0190521	0.0341222	0.543632	0.0244132	0.0397343	0	0	0	0.0237484	0	0	0	0.0320163	0	0	0	0.0457691	0.0640127	0.0263558	0.0411803	0	0	0	0	0	0	0	0	0.0192341	0	0	0.0261445	0	0.159436	0	0.0250568	0.267824	0.0368228	0
AP001610.1	0	0	0	0.0409732	0	0.0195102	0.0416687	0	0	0.0323416	0.139152	0.0453128	0.0433152	0	0.0131914	0.0801814	0.0590032	0.0830875	0.0946106	0.0148991	0	0.0439076	0.0850325	0	0.0770544	0	0.0303897	0.382528	0	0.0410142	0	0	0	0.0157563	0.0287834	0.0252026	0.014729	0	0.0510841	0.0695297	0.0290382	0.416625	0.0165534	0.0132328	0.0133405	0.0166372	0.191508	0.268945	0.028251
AC008760.1	2.25534	0.0285485	0.044089	0.0222187	0.0408557	0.0634794	0.248554	0.101192	0.044691	0.0789211	0.0205796	0.0368579	0.18791	0.0791116	0.1073	0.28697	0	0.0540675	0.256524	0.121191	0.133524	0.14286	0.172916	0.0308423	0.104461	0.03065	0.247193	0.115242	0.0569377	0.0667228	0.101056	0.078996	0.159876	0	0.0936511	0.0205	0.0479228	0	0.145433	0.113112	0	0.197684	0.0538589	0	0.17362	0.0811971	0.0667608	0.0795501	0.0689391
AL133338.1	0.147615	0.206558	0.249218	0.271282	0.868338	0.272706	0.67439	0.21736	0.970062	0.142755	0.353637	0.466689	2.21995	0.381599	4.79397	0.601662	0.282142	0.146699	1.61243	0.263057	1.33844	0.430683	1.11035	0.320784	0.444041	0.304924	0.804837	0.39606	0.811053	0.382186	0.923106	0.250058	0.108446	0.220235	0.264686	0.120514	1.32194	0.370162	0.347621	0.179026	1.474	0.40866	0.901151	0.389395	0.147211	0.269265	0.332087	0.197853	0.592322
AF096876.1	0	0	0	0	0	0	0	0	0	0	0	0	0	0.0407437	0	0	0	0	0	0	0	0	0	0	0	0	0	0	0	0	0	0	0	0	0	0	0	0	0	0	0	0	0	0	0	0	0	0	0
AL121957.1	0	0.129697	0.125187	0.100941	0.0232012	0	0.051327	0.0287326	0	0.0298785	0.0233735	0.0418618	0	0	0	0.02963	0.109019	0.153519	0.0291351	0.0275288	0.101101	0.0540849	0	0.070059	0	0.0348111	0.0561505	0	0.0970015	0	0	0	0	0	0	0.0232832	0.0272144	0	0.0707904	0	0.0536533	0.0320746	0	0.0489	0	0.0307402	0	0.225875	0.0260995
AC002128.1	0.160295	0.0385518	0.119075	0.135018	0.34482	0.0428611	0.36616	0.0170812	0.0452628	0.0710497	0.0972667	0.0871022	0.412347	0.0534159	0.304284	0.123303	0	0.109519	0.640857	0.0818276	0.225388	0.112535	0.723864	0.0624739	0.366767	0.0413896	0.100142	0.0466865	0.211443	0.165187	0.109172	0.0533378	0.107948	0	0.0948494	0.0276831	0.194144	0.0276346	0.14028	0.11456	0.191377	0.0572039	0.127279	0	0.102574	0.0730987	0.165281	0.026856	0.124127
AC013733.2	0	0	0	0	0	0	0	0	0	0	0	0	0	0	0	0	0	0	0	0	0	0.0257223	0	0	0	0	0	0	0	0	0	0	0	0	0	0	0	0	0	0	0	0	0	0	0	0	0	0	0
AP000281.2	0	0	0.275671	0	0	0	0	0	0	0	0	0	0	0	0	0	0	0	0	0	0	0	0	0	0	0	0.0883201	0	0	0.0397325	0	0	0	0	0	0	0	0	0	0	0	0	0	0	0	0	0	0	0
AL109955.1	0.0132191	0.0635854	0.0196397	0.00989741	0.00909967	0	0.0201309	0.0225383	0.0099539	0.0468744	0.036669	0.00820926	0.0837052	0.0352406	0	0.0929688	0.0641373	0	0.034281	0.021594	0.00991317	0.0742438	0.123242	0.0549554	0.0279197	0	0.0220227	0.0410679	0.0634079	0.0396293	0.0360126	0.0175946	0	0	0.0104293	0.0456592	0.0533685	0.0364633	0.0185097	0.0251932	0.0210432	0.0754794	0.0119958	0.0287684	0.096675	0.0482262	0.00991296	0.106308	0.0614185
LINC01880	0.0362877	0	0	0	0	0	0.0276306	0	0	0	0	0.0225352	0.0574448	0	0.0262416	0	0	0	0	0	0	0	0	0	0	0.0374793	0	0.0281839	0	0	0	0	0	0.0313441	0	0	0	0	0	0	0	0	0	0	0	0	0	0	0
FP236315.1	0	0	0	0.0333523	0.0306641	0	0.0339185	0.0759496	0	0	0	0.0276636	0.0352588	0	0	0	0	0	0	0	0.100216	0	0	0	0.0313613	0.0460085	0	0.0345977	0	0	0	0	0	0	0	0	0	0	0.031187	0	0	0.0423918	0	0	0	0.0406282	0.0334047	0.0597061	0
LEMD1-AS1	0	0.0140844	0	0	0.00503901	0.00782935	0	0	0.00551205	0	0.0101529	0.00909188	0.00579405	0.0130098	0	0.0193058	0	0	0.00632779	0.00597892	0	0.0646063	0.00853077	0	0.00515358	0	0	0	0	0	0.00997114	0	0	0	0.0115506	0.0101137	0	0.0201919	0	0	0	0	0.00664279	0	0	0.066764	0	0.00981146	0.011337
AL360270.2	0.149662	0.00654446	0.0379011	0.0152802	0.00936575	0.029104	0.108777	0.0202977	0.0589084	0.0271378	0.0235883	0.0591451	0.088845	0.0332485	0.0172182	0.0418631	0.0110021	0.00619721	0.0911487	0.0222254	0.0663197	0.0545819	0.0436031	0.024746	0.00957869	0.0456703	0.0396666	0.0607613	0.0391572	0.0178448	0.0138996	0.0226363	0.00305416	0.0176281	0.120761	0.016448	0.0466897	0.0328383	0.0071441	0.0518598	0.0866341	0.0258955	0.0895128	0.0690891	0.0721387	0.0372272	0.0382606	0.022795	0.0237054
AC104825.1	0.557652	0.452085	0.633015	0.248639	0.612471	0.221152	0.982812	0.235025	0.330265	0.211072	0.30851	0.186774	0.223175	0.445434	0.398737	0.110166	0.222937	0.0913272	0.503716	0.511769	0.991439	0.799338	2.63601	0.638186	0.635218	0.25886	0.532367	0.691038	2.23608	0.309936	2.75676	0.400305	0.540105	0.135303	0.731625	0.571351	1.58355	0.88145	0.833478	0.453773	0.259332	0.28025	0.631138	0.377263	3.0564	0.788629	0.779978	0.579474	0.528866
AC024681.2	0	0	0.0741301	0	0.618243	0	0.0759841	0	0	0	0	0	0	0	0.144329	0	0	0	0	0	0	0	0	0	0	0	0	0	0	0	0	0	0	0	0	0	0	0	0.13973	0	0	0	0	0	0	0	0	0	0
AC012414.4	0	0	0	0	0	0	0	0	0	0	0	0	0	0	0	0	0	0	0	0	0	0	0	0	0	0	0	0	0	0	0	0	0	0	0	0	0	0	0	0	0	0	0	0	0.0138621	0	0	0	0
LINC02317	0	0	0	0	0	0	0	0	0	0	0	0	0	0	0	0	0	0	0	0	0	0	0	0	0	0	0	0	0	0	0	0	0	0	0	0	0	0	0	0	0	0	0	0	0	0	0	0	0
AC093802.1	0.00628704	0	0	0	0	0	0	0	0	0.0111468	0	0	0	0	0	0.011054	0	0	0	0	0	0	0	0	0	0	0	0	0	0	0	0	0	0	0	0	0	0	0	0	0.0100082	0	0	0	0	0	0	0	0.00486846
AC093249.6	0.47879	0.170595	0.579609	0.159324	0.378413	0.132765	0.229541	0.196523	0.200292	0.361561	0.258248	0.165186	1.36149	0.31516	0.512947	0.233839	0.344151	0.129234	0.628485	0.101386	0.744697	0.27033	0.351315	0.0921508	0.586768	0.238098	0.827193	0.151501	2.858	0.239226	0.905806	0.401242	0.191071	0.10722	0.293802	0.0857502	0.128866	0.220114	0.670413	0.236571	0.338745	0.303759	0.402299	0.257279	0.440932	0.145561	0.239362	0.166376	0.288367
AL031710.1	0.173995	0	0.0323131	0	0.0299434	0	0.0331213	0	0	0	0	0	0	0	0	0	0.1407	0	0	0	0.0652405	0	0	0	0	0	0	0	0	0	0.20738	0	0	0	0	0	0	0	0	0	0	0	0	0	0.0318118	0	0	0	0
HCG27	0.250792	0.149753	0.167029	0.0517996	0.476245	0.0277486	1.16552	0.0516064	0.10419	0.0919964	0.089959	0.0912993	1.10205	0.184437	0.537831	0.182462	0.167836	0.133928	1.51755	0.0635711	0.940362	0.749377	0.433362	0.116844	0.255713	0.0535919	0.244925	0.295535	0.348447	0.207406	0.0647891	0.126615	0.124242	0.0373492	0.307031	0.0716892	0.146639	0.119273	0.284565	0.0988893	0.178966	0.197516	0.643515	0.14429	0.126491	0.118312	0.220494	0.0811384	0.234385
AC139768.1	1.15616	0.218088	0.235763	0.271573	0.405736	0.145479	0.397013	0.289886	0.290193	0.34164	0.581682	0.281565	0.215322	0.36261	0.196725	0.797171	0.549952	0.39238	1.17578	0.18516	0.204004	0.67299	1.03033	0.164927	0.11172	0.187313	0.830878	0.281713	0.782925	0.305825	0.154397	0.211213	0.305331	0.313301	0.160969	0.187925	0.549137	0.281393	0.34917	0.129613	0.43305	0.194162	0.226291	0.328904	0.746055	0.31014	0.203999	0.273464	0.702186
AC079298.1	0	0	0	0.00941447	0	0	0	0	0	0	0	0	0	0	0	0	0	0	0	0	0	0	0	0	0	0	0	0	0	0	0	0	0	0	0	0	0	0	0	0	0	0	0	0	0	0	0	0	0
FOXD2-AS1	1.00611	0.0936675	0.427939	0.139724	1.54154	0.208275	1.70515	0.0760859	4.11787	0.172626	0.163176	0.125969	2.97989	0.346086	2.71665	0.392311	0.28869	0.0739145	8.65501	0.258457	2.78675	0.423151	2.11805	0.252983	0.588365	0.209505	1.06787	0.352899	0.194596	0.188512	0.221042	0.183589	0.269561	0.0700838	0.953811	0.0728655	0.222748	0.313332	3.05613	0.355657	0.73622	0.262528	0.633212	0.18835	0.302625	0.140604	0.523265	0.282753	2.68913
AL136369.2	0	0	0	0	0	0	0	0	0	0	0	0	0	0	0	0	0	0	0	0	0	0	0	0	0	0	0	0	0	0	0	0	0	0	0	0	0	0	0	0	0	0	0	0	0	0	0	0	0
LINC02301	0	0	0	0	0	0	0.0530243	0	0	0.0102888	0	0	0.0459329	0	0.0251794	0	0	0	0	0	0.0087037	0	0	0	0	0	0	0	0	0	0	0	0	0	0.00915687	0	0	0	0.0731313	0	0	0	0	0	0	0	0	0.0155563	0
LINC01429	0	0	0	0	0	0.00936089	0	0	0	0	0.00606946	0.0054352	0	0	0.00632913	0.00769411	0	0	0	0	0	0	0	0	0	0	0	0	0	0	0	0	0	0	0	0	0	0	0	0	0	0	0	0	0	0	0	0	0
AC068620.1	0	0.0740427	0.085761	0.0864387	0.105962	0.205798	0.058604	0.0656125	0.173864	0.0341146	0.213498	0.119492	0.0609197	0.170985	0.166974	0.101492	0.124476	0.210342	0.432455	0.0314317	0.115435	0.0926294	0.089694	0.159984	0.0541857	0.198732	0	0.0298887	0.0738361	0.0576835	0.209677	0	0.103663	0.265921	0.0607227	0.186089	0.155364	0.0530752	0.134711	0	0.12252	0.18311	0.139687	0.195415	0.0562871	0.105295	0.144291	0.154739	0
ADIRF-AS1	0.0318749	0.068143	0.0631421	0.0530342	0.0585115	0.03788	0.0161803	0.054346	0.0346689	0.0722116	0.139997	0.0505867	0.0336394	0.125889	0.210015	0.0747244	0.183292	0.170997	0.107153	0.0289272	0.0239034	0.207438	0.152712	0.0331281	0.0374011	0.0951067	0.277314	0.0907738	0.118917	0.124755	0.00964848	0.0235696	0.114483	0.0152958	0.00558843	0.0513785	0.163002	0.0586154	0.0297546	0.0404985	0.0451031	0.0876304	0.202477	0.0719378	0.0569824	0.119517	0.0132794	0.0332289	0.0383955
AC006001.2	0.585981	0.313182	0.838349	0.601231	0.911326	0.557103	2.77626	0.703061	0.457582	0.615663	0.391319	0.633461	2.35343	0.655721	0.423755	0.629621	0.9477	1.0874	0.318933	0.354528	0.846319	0.592051	1.51753	0.879696	0.80981	1.12078	0.289253	0.202275	0.458051	0.601833	0.576471	1.81986	0.506672	0.206209	1.62666	0.389807	0.595816	0.508854	1.59543	0.992689	0.552778	0.536993	0.571145	0.787196	1.55546	0.851156	2.32733	0.814498	0.974751
TOLLIP-AS1	1.56095	0.583984	1.38502	0.324644	0.790964	0.44057	0.594278	0.258746	0.604018	0.884073	0.360833	0.484688	1.73316	0.308246	0.595761	0.62895	0.561002	0.335748	1.34934	0.513518	1.20309	0.591421	0.53057	0.202791	0.900527	0.87328	0.541772	0.521987	1.95504	0.666186	1.29937	0.490549	0.486666	0.262169	0.307882	0.134789	0.52516	0.657816	0.364281	0.330544	0.862795	0.763369	1.65259	0.597632	0.428088	0.375691	0.69908	0.464932	0.621162
AC009065.8	1.13671	0.621329	0.614113	0.270797	0.426807	0.248681	2.04579	0.286305	1.45898	0.687054	0.465808	0.433174	1.02241	0.275485	1.25171	0.613205	0.668503	0.400086	2.56817	0.443115	0.813685	0.41456	0.662347	0.2685	0.636579	0.747113	0.301275	0.782531	1.26397	0.542137	1.03811	0.51578	0.533529	0.312406	0.815287	0.285544	0.834392	0.356304	0.669215	1.03395	0.699127	0.565457	1.35973	0.712153	0.39676	0.424121	0.69743	0.242385	0.50013
AC106786.2	0.290302	0.139639	0.0539128	0.0543388	0.099918	0.0776236	0.0828918	0.0928048	0.0819733	0.0643373	0.025165	0.0901409	0.0861671	0.128985	0.0524833	0	0	0.0330573	0.219578	0.0296388	0.0272126	0.116461	0	0.0377145	0.10219	0.0374793	0.664998	0.197287	0.0348122	0	0.197716	0.0965976	0.0325832	0.15672	0.143148	0.125339	0.117202	0.0500477	0.050811	0.0691579	0	0.207198	0.164649	0	0.106153	0.0661928	0.217696	0.0972751	0.0842999
AC011396.1	0	0	0	0	0	0	0	0	0	0	0	0	0	0	0	0	0	0	0	0	0	0	0	0	0	0	0	0	0	0	0	0	0	0	0	0	0	0	0	0	0	0	0	0	0	0	0	0	0
AC067817.2	1.05206	0.303633	0.0781526	0.0787701	0.108632	0	0.360483	0.358749	0.237659	0.0932642	0.474234	0.196004	0.0832726	0.280468	0.0760804	0.647418	0.340298	0.0958405	0.0909436	0.0429648	0.118343	0.337646	0.122605	0.109343	0	0.108661	0.262906	0	0.201857	0.078849	0	0	0.094466	0	0	0.218032	0.127423	0.0725498	0.110484	0	0	0.150179	0.0477354	0.0763194	0.0769403	0	0.0394469	0	0.0407341
AC034234.1	0	0	0	0	0	0	0	0	0	0	0	0	0	0	0	0	0	0	0	0	0	0	0	0	0	0	0	0	0	0	0	0	0	0	0	0	0	0	0	0	0	0	0	0	0	0	0	0	0.0219862
AC015878.2	0	0	0	0	0	0	0	0	0	0	0	0	0	0	0	0	0	0	0	0	0	0	0	0	0.0397012	0	0	0	0	0	0	0	0	0	0	0	0	0	0	0	0.0897689	0	0	0	0	0	0	0	0.0436678
AC073257.1	0	0	0.028915	0	0	0	0	0.0331826	0	0	0	0	0	0.0345893	0	0	0	0	0	0	0	0	0	0	0	0	0	0	0	0	0	0	0	0	0	0	0.0314293	0	0	0	0	0	0	0.0564734	0	0.0355011	0	0	0
SPON1-AS1	0.0848226	0	0.126021	0	0.0583896	0	0	0	0.0638708	0	0	0.0526761	0.0671386	0	0.306699	0.0745687	0	0	0.146646	0	0	0.0680569	0.197701	0.0881576	0.0597172	0	0.141312	0	0	0.127144	0	0	0	0	0	0	0.136979	0	0.118771	0	0	0	0.153947	0	0.0620331	0.0773628	0.0636082	0	0
SRGAP2-AS1	0	0.0295724	0.00570877	0	0	0	0.0351093	0	0.0231468	0	0	0.00477247	0	0.00682906	0.0055574	0	0	0	0.0398586	0	0.0115261	0.0184979	0.00895586	0	0	0.0079373	0.0128029	0.0119374	0	0.00575964	0	0	0	0	0.0121262	0.00530881	0.0186155	0.010599	0.00538032	0	0	0	0	0.00557486	0	0.0140182	0.00576292	0	0.00595096
AL162724.2	0.528764	0.254342	0.196397	0.148461	0	0.212079	0.35229	0.112692	0.398156	0.468744	0	0.410463	0.994	0.469875	0.0477973	1.22022	0.106895	0.662326	1.54264	0.10797	0.495659	0.318188	1.15539	0.48086	0.0465328	0.477861	0.99102	0.256674	1.64861	1.04027	0.135047	0.351891	0.178044	0.114182	0.15644	0.273955	0.160106	0.0911584	0.231371	0.251932	0	0.251598	0.0599792	0.19179	0.145012	0.241131	0.346954	0.17718	0.153546
AC022294.1	0	0.0226408	0.0174827	0	0	0	0	0	0	0	0	0	0	0	0	0	0	0.0643184	0	0	0	0	0	0	0	0	0	0	0	0	0	0	0	0	0	0	0	0	0	0	0	0	0	0	0	0	0	0	0
AP000439.2	0	0.107903	0.0416599	0	0	0.0599819	0.0427018	0.0478085	0	0.0248576	0.0777828	0.104482	0	0	0	0	0	0	0.121195	0.114514	0	0	0.0653555	0	0	0.115845	0	0.370233	0	0.105078	0	0.0373218	0	0.0242204	0	0	0	0.502752	0.0196315	0	0	0	0	0	0.0615204	0.0511489	0.0210275	0.0375836	0.0217136
WWC2-AS2	0.671431	0.116627	0.0554193	0.0279286	0.173323	0.129663	0.326631	0.0635987	0.224704	0.0413345	0.232814	0.173737	0.250962	0.215458	0.168593	0.114774	0.135737	0.144419	0.249897	0.182802	0.454562	0.13468	0.0869411	0.116305	0.236352	0.17337	0.217503	0.159343	0.134194	0.349457	0.127026	0.124121	0.100481	0.1611	0.183934	0.0644207	0.0527085	0.102892	0.195865	0.266589	0.20783	0.150867	0.236949	0.297656	0.300078	0.161601	0.370635	0.237484	0.187754
AC005186.1	0	0	0	0	0	0	5.81565	0	0.0226425	0	0	0.018674	0	0	0.239198	0.079305	0.0972638	0.0273931	0.0519869	0	0.315699	0.0723795	1.50685	0	0.14819	0	0	0	0.951962	0.0450732	0.102399	0	3.75303	0.0259734	1.04386	0	0	0	0.0842096	0	0	0	0	0	0.0659732	0	0	0	0
AL033527.3	0.119149	0	0.050577	0	0.011717	0	0	0	0.0256338	0	0	0.0105705	0	0.0302511	0.073854	0	0	0	0.367842	0.0139025	0.0638223	0	0.0396723	0	0.0239667	0	0	0.02644	0	0.0127569	0.0115927	0	0.0764179	0	0	0	0	0	0	0	0	0	0.0154461	0	0.0497925	0.0155243	0	0	0
AL662844.3	0.0787521	0	0	0.088445	0.29816	0	0.41975	0	0.1186	0.139626	0.0273067	0.0733594	0.498669	0.139963	0.17085	0.0692321	0	0.0717414	0.612682	0	0.236229	0.379118	0.321216	0.0409242	0.138608	0.122007	0.131199	0.061165	0	0.0295112	0	0.0524093	0.0707124	0.0680233	0.248529	0.0272012	0.0953821	0	0.192974	0	0	0.0374721	0.393055	0.0856932	0.0863904	0.0359131	0	0.0527769	0.0609829
AC087857.1	0	0	0	0	0	0	0.0663844	0.0371617	0	0	0	0	0	0	0	0	0	0	0	0	0	0	0	0	0	0	0	0.0338568	0.209097	0	0	0	0	0	0	0	0	0	0	0	0	0	0	0	0	0	0.163447	0	0
LINC01730	0.0482976	0	0.0358779	0.0542421	0.0997402	0	0.239039	0.0205866	0.127287	0.0428152	0.0167468	0	0.344055	0.0214593	0	0.0424591	0.078111	0	0.208749	0.0394481	0.0724379	0.0387512	0.422136	0.0250983	0.153012	0.0498835	0.120694	0.0562674	0.139001	0	0.131576	0	0.0433669	0.0208589	0.0381048	0	0	0.0333058	0.0507206	0.0460232	0.038442	0.137887	0.0657423	0.0350363	0.0353213	0	0	0.0323673	0.2057
AC104316.2	0	0	0.0463881	0	0.0429862	0	0.0475483	0	0	0	0	0	0	0	0	0	0.201986	0.113774	0	0	0	0.0501032	0	0	0	0	0	0	0.539162	0	0	0	0.0560711	0	0	0	0	0	0	0	0	0	0	0	0.0913371	0	0	0	0
AC008079.1	0.0209603	0.0172837	0.0237263	0.0104623	0.00961899	0.00960781	0.0227997	0.00680702	0.0142798	0.0106177	0.0166122	0.0105373	0.0237006	0.0133042	0.0108268	0.0201814	0.00645691	0.0136388	0.0301978	0.00326091	0.00224548	0.0104107	0.00697903	0.0103735	0.0259996	0.0103088	0.00997693	0.0100777	0.00957523	0.00748053	0.0129159	0.0132848	0.00716971	0.000862131	0.0157493	0.0048265	0.020148	0.00688291	0.013277	0.00951108	0.00794435	0.0132978	0.00724596	0.00144811	0.0321176	0.0063723	0.0217059	0.0147157	0.0123664
AC244100.3	0	0.367397	0.0788042	0.20651	0.540385	0.204232	1.53473	0.397914	0.167748	0.2257	0.323696	0.500684	2.09078	0.405356	1.00496	0.158541	0.0514702	0.0773117	0.293446	0.285932	1.45583	0.519204	0.111264	0.0551272	0.0597483	0.230091	0.0706929	0.552031	0.30531	0.190815	0.238427	0.635385	0.0381014	0.192425	0.594238	0.0806114	0.368324	0.292619	0.80212	1.0311	0.30397	0.827822	1.48251	0.638732	0.08534	0.783706	0.429579	1.10906	0.0821474
AL157944.1	0	0	0	0	0	0	0	0	0	0	0	0	0	0	0	0	0	0	0	0	0	0	0	0	0	0	0	0	0	0	0	0	0	0	0	0	0	0	0	0	0	0	0	0	0	0	0	0	0
DSCR4-IT1	0	0	0	0	0.0330507	0	0	0	0	0	0	0	2.73621	0	0.868017	0	0.232951	0	1.24511	0	0.0360054	0	0.055953	0	0	0	0	0	0	0	0	0	0	0	0	0	0	0	0.168072	0	0	0	0	0	0	0	0	0	0.0371794
AP000542.3	0	0	0	0	0	0	0	0	0	0	0	0	0	0	0.00240785	0	0	0	0	0	0	0	0	0	0	0	0	0	0	0	0	0	0	0	0	0	0	0	0	0	0	0	0	0	0	0	0	0	0
AC119150.1	0	0.104357	0.0268606	0	0.224017	0.116022	0.468051	0.0616501	0	0.0320544	0.150454	0.157186	0.114481	0.0321318	0.130742	0.0953632	0.175438	0	2.03169	0	0.244044	0.174071	0.547803	0.075161	0.0254567	0	0.0602396	0.168502	0.971279	0.0812999	0	0	0.941556	0.0936981	0	0	0	0.0997399	0	0.0689122	0.345363	0.172052	0	0.236075	0.581767	0.164894	1.84385	0	0.0560003
AC099791.2	0.286053	0	0	0	0.0984555	0	0.0363015	0.0812857	0.0717986	0.0422638	0.0330622	0	0.150944	0.0423658	0.0344767	0	0	0	0.0824243	0	0.0715048	0.153008	0.0555599	0	0	0	0.158852	0.0370284	0	0	0	0	0	0	0	0	0	0.0657536	0	0	0	0	0.0432637	0	0.0348664	0	0	0	0
AP001468.1	0	0	0	0	0	0	0	0	0	0	0	0	0	0	0	0	0	0	0	0	0	0	0	0	0.0257309	0	0	0.0283863	0	0	0	0	0	0	0	0	0	0	0	0	0	0	0	0	0	0.0333341	0	0	0
AC008662.2	0	0	0	0	0	0	0	0	0	0	0	0	0	0	0	0	0	0	0	0	0	0	0	0	0	0	0	0	0	0	0	0	0	0	0	0	0	0	0	0	0	0	0	0	0	0.0477303	0	0	0
AC020703.1	0	0	0	0	0	0	0	0	0.0294223	0	0	0	0	0	0	0	0	0	0	0.0319143	0	0.0313506	0	0	0	0	0.0650958	0	0	0	0	0	0	0	0	0.0269924	0	0	0	0	0	0	0	0	0	0	0	0.0523717	0
AP002992.1	0.236104	0.0757125	0.0779512	0.117851	0.0722345	0.0280585	0.319603	0.0447281	0.0197539	0.162792	0.109156	0.0325832	0.996696	0.233121	0.0379422	0	0.0848551	0.0955935	0.181418	0.192843	0.0786922	0.294679	0.122289	0.0545305	0.129285	0.189667	0.262229	0.101876	1.43452	0.176953	0.0178671	0.209502	0.117778	0.0453196	0.869289	0.0724899	0.211824	0.180907	0.128566	0	0.208805	0.274618	0.261868	0.0951533	0.038371	0.0478533	0.275417	0.0703239	0.101573
USP3-AS1	0.292104	0.108081	0.300448	0.0799113	0.301615	0.108146	0.248081	0.100564	0.088827	0.129474	0.112972	0.11512	0.604692	0.104827	0.138116	0.113581	0.0545096	0.122815	0.184522	0.133056	0.256966	0.153241	0.281494	0.0992503	0.237287	0.174055	0.102943	0.0916209	0.31256	0.0842013	0.298416	0.119627	0.166449	0.0727815	0.23489	0.0814911	0.140608	0.0697271	0.157312	0.117763	0.107307	0.144336	0.0917562	0.12225	0.143785	0.117837	0.341209	0.112937	0.130497
LINC01548	0	0	0	0	0	0	0	0	0	0	0	0	0	0	0	0	0	0	0	0	0	0	0	0	0	0	0.0569999	0	0	0	0	0	0	0	0	0	0	0	0	0	0	0	0	0	0	0	0	0	0
LINC00395	0	0	0	0	0	0	0	0	0	0	0	0	0	0	0	0	0	0	0	0	0	0	0	0	0	0	0	0	0	0	0	0	0	0	0	0	0	0	0	0	0	0	0	0	0	0	0	0	0
AL162425.1	0	0.0256843	0	0	0	0	0	0	0	0.0118339	0	0	0	0.0118624	0	0	0	0	0	0	0.0100107	0	0	0.013874	0	0.0137875	0	0	0	0.0100048	0	0	0	0.046122	0	0.00922166	0	0	0	0	0	0	0	0	0	0	0	0.0178922	0
LINC01874	0	0	0	0	0	0	0	0	0	0	0	0	0	0	0	0	0	0	0	0	0	0	0	0	0	0	0	0	0	0	0	0	0	0	0	0	0	0	0	0	0	0	0	0	0	0	0	0	0
DLGAP1-AS4	0	0	0	0	0	0	0	0	0	0	0	0	0	0.0238972	0	0	0.0434925	0	0	0	0	0	0	0	0	0	0	0	0	0	0	0	0	0	0	0	0	0	0	0	0	0	0	0	0.019667	0	0	0	0
AC011893.1	0	0	0.00812166	0.00818583	0.00752605	0	0	0	0	0.0290762	0	0	0	0	0	0	0.0176819	0	0.0094509	0	0	0.0087721	0.0127412	0	0	0	0.0182142	0.0254745	0.0104885	0.0163881	0	0	0	0	0.00862576	0	0	0	0	0	0	0	0	0	0.0319827	0	0	0	0
AC008736.2	0.0394524	0.0379541	0	0	0.0814738	0	0.0300402	0	0.0297074	0.0699482	0.0273596	0	0.0312272	0.105175	0.0285302	0	0	0	0.0341038	0.0322236	0.0887575	0	0	0	0.111102	0.122244	0.0657266	0	0.0378481	0.0295684	0.0268699	0.0525109	0	0	0.0933788	0	0	0	0	0	0.0628035	0	0.0358015	0	0	0	0.0295852	0	0.0305505
AC010387.1	0	0	0	0	0	0	0	0	0	0	0	0	0	0	0	0	0	0	0	0	0	0	0	0	0	0	0	0	0	0	0	0	0	0	0	0	0	0	0	0	0	0	0	0	0	0	0	0	0
LINC01771	0	0.0690804	0	0.0268819	0	0	0	0	0.135176	0	0	0	0	0	0	0	0	0	0	0.0293252	0	0.0576143	0.0418414	0	0.227494	0	0.0598147	0	0	0	0	0	0	0	0	0.0248025	0	0	0	0	0	0.0341676	0	0	0.0525148	0	0	0	0
AC091027.2	0	0	0	0	0	0	0	0	0	0	0	0	0	0	0	0	0	0	0	0	0	0	0	0	0	0	0	0	0	0	0	0	0	0	0	0	0	0	0	0	0	0	0	0	0.0831729	0	0	0	0
AC103808.1	0	0	0	0	0	0	0	0.0188227	0	0	0.0153119	0	0.0699057	0	0	0.0194105	0	0	0	0	0	0	0	0	0	0	0	0	0	0	0	0	0	0	0	0	0	0	0	0	0	0	0	0	0	0	0	0	0
AP005328.2	0	0	0	0	0	0.0331407	0.094373	0	0	0	0	0	0	0	0	0.0817191	0	0	0.0803542	0	0	0	0.0361097	0	0	0	0	0	0	0	0	0	0	0	0	0	0.025019	0	0	0.0590526	0	0	0	0	0	0	0	0	0.023994
AP003031.1	0	0.155021	0.0199506	0.321731	1.1832	0.0861745	0.0408991	0.0228951	0.525797	0.0952329	0.0372495	0.133428	0.170061	0.16706	1.68968	0.118051	0	0.0978635	0.510748	0.0658075	0.140982	0.064645	0.563368	0.223302	0.964298	0.41608	0.0894853	0.0417181	0.128823	0.161027	0.274371	0.28597	0.024115	0.139187	0.233077	0	0.56382	0.185203	0.95894	0.204737	0.0427527	0.204465	0.121857	0.253274	0.0196411	0.293938	0.0604194	0	0.332751
AL117382.2	0.202059	0.534559	0	0.416035	0.486821	0.378198	0.923122	0.25838	0.152149	0.179123	0.490437	0.596037	0.879632	0.628443	0.657539	0.0888163	0	0.0920354	0.218332	0.123777	0.151526	0.324241	0.176606	0.315005	0	0.782602	0	0.196168	0.145382	0.567889	0	0.874052	0	0.479961	0.916642	0.244271	0.856545	0.696694	1.73293	0.866447	0.0804134	0.91337	1.28352	0.622959	0	0.64501	1.32583	0.541651	0.312935
LINC01299	0.00772871	0	0.00574128	0	0	0	0	0	0	0	0	0	0	0	0	0	0	0	0	0	0	0.00620108	0	0	0	0	0	0.00600271	0.00741444	0	0	0	0	0	0	0	0	0	0	0	0	0	0	0	0	0.007049	0	0	0
AL021578.1	1.26337	1.54686	0.234623	0.601942	0.61272	0.429941	0.218628	0.538503	0.454032	0.941784	0.876126	1.06987	0.840889	0.612362	0.892845	4.39209	1.06805	3.21728	1.76224	0.609749	0.215321	0.57594	0.50192	0.686361	0.202146	0.62277	0.143505	0.334509	0.41318	0.36583	0.430221	0.57325	0.283598	0.248012	1.08736	0.35703	0.765075	0.158402	0.683476	1.75109	0.274245	2.15863	0.31267	0.416581	0.167988	0.942757	0.38757	0.192424	0.533622
AP001610.2	0	0	0	0	0	0	0	0	0	0	0	0	0	0	0	0	0	0	0.0417004	0	0	0	0	0	0	0	0	0	0	0	0	0	0	0	0	0	0	0	0	0	0	0	0	0	0	0	0.0361753	0	0.0373556
AP006565.1	0	0	0	0	0	0	0	0	0	0	0	0	0	0.0308706	0	0	0	0.031647	0.03003	0	0	0.0557462	0	0	0	0	0	0.053963	0	0	0	0	0	0	0	0	0	0	0	0	0	0.0991795	0	0	0	0	0	0	0.0538023
AC107074.1	0.0266458	0	0.118763	0	0.0917114	0	0	0	0	0	0	0	0.0210906	0	0	0	0	0	0	0	0	0	0	0	0.187593	0	0	0	0	0	0	0	0	0	0	0	0	0	0	0	0	0	0	0	0	0	0	0	0
AC009145.3	0	0	0	0	0	0	0	0	0	0	0	0	0	0	0.0618553	0	0	0	0.0369697	0	0	0	0	0	0	0	0	0	0	0	0	0	0	0	0	0	0	0	0	0	0	0	0.0388101	0	0	0	0	0	0
LINC01776	0	0	0	0	0	0	0.00695413	0	0	0	0	0	0	0	0	0	0	0	0.0157897	0	0	0	0	0	0	0	0.0912918	0	0	0	0	0	0	0	0	0	0	0	0.00639411	0	0	0	0	0	0	0	0	0	0
AL139130.1	0	0	0.00270722	0	0.00501737	0	0.0138747	0	0.0439069	0	0	0	0.00576916	0.00647697	0.00790632	0.00640762	0	0.00331993	0.0063006	0	0	0	0.00424706	0	0.00513144	0	0	0	0.0209771	0	0.0124104	0	0.0261785	0	0	0	0	0.00502628	0.00510293	0	0	0	0	0	0.00533045	0	0.0683224	0.00488465	0
SNCA-AS1	0	0	0	0	0	0	0	0	0	0	0	0	0	0	0	0	0	0	0	0	0	0	0	0	0	0	0	0	0	0	0	0	0	0	0	0	0	0	0	0	0	0	0	0	0	0	0.00510567	0	0
LINC002481	0.044717	0.0752829	0.0664362	0.0753312	0.046173	0.0239137	0.323465	0.047651	0.101015	0.178385	0.0465159	0.0416549	0.212366	0.139079	0.048506	0.0687949	0.14464	0.10184	0.26092	0.0730472	0.19282	1.18399	0.429925	0.116188	0.181021	0.0115463	0.148995	0.217067	0.0965221	0.234599	0.0456832	0.0892772	0.0803039	0.0482812	0.158759	0.0540589	0.153453	0.0770916	0.101747	0.0426113	0.355921	0.106387	0.101447	0.137865	0.498718	0.0815687	0.0922161	0.119871	0.3809
AC244502.3	0	0	0	0	0	0	0	0	0	0	0	0	0	0	0	0	0.0720433	0	0	0	0	0	0	0	0	0	0.148424	0	0.0427344	0.0333857	0	0	0	0	0	0	0	0	0	0	0.0709116	0	0	0	0	0	0	0	0
AC020656.2	0	0.0368889	0.00854541	0.0803874	0.0448728	0.0410123	0.832118	0.0490332	0.0895082	0.0305933	0.0505244	0.0190503	0.00910525	0.269189	0.12201	0.219113	0.0186045	0.0314384	0.0464054	0.0219235	0.0230044	0.110757	0.281525	0.0797055	0.0107984	0.0158417	0.0511055	0.0416945	0.0735718	0.270142	0.00261158	0.071452	0.0482027	0.0198727	0.0635307	0.0026489	0.0835963	0.0158656	0.0107384	0.124234	0.0305204	0.0109473	0.00695935	0.0890129	0.134606	0.0804375	0.580848	0.0719532	0.0801715
LINC01219	0	0	0	0.0211108	0.0582278	0.0301571	0	0	0	0.0249953	0	0.0175101	0.0223175	0	0	0	0	0	0.0974935	0	0	0.0226228	0	0.0293045	0.0198506	0	0	0	0	0	0	0.0375286	0.0506348	0.0487092	0.0667361	0.0194779	0	0	0	0	0	0.0268325	0	0.020454	0	0.0514323	0	0.0755836	0
PRKAG2-AS1	3.95596	2.45856	12.977	2.17556	1.95201	0.786315	3.05217	2.3577	2.60975	5.98968	2.5249	2.21756	13.2314	1.97545	6.56964	3.09303	2.49122	1.69027	3.37426	4.90386	2.59908	2.7527	2.97826	1.4554	2.25518	3.52541	1.22479	2.06646	9.95793	4.98518	1.63326	5.75462	5.10811	2.7064	4.43304	1.57196	3.74544	3.91095	1.96079	2.70215	2.95365	2.58196	5.5119	3.04752	8.44888	2.84174	5.93312	2.01769	1.57234
LINC01994	0	0	0	0	0	0	0	0	0	0.00998154	0	0	0	0	0	0	0	0	0	0	0	0	0	0	0	0	0	0	0	0	0	0	0	0	0	0	0	0	0	0	0	0	0	0	0	0	0	0	0
AL121929.1	0.11655	0.0747493	0	0	0	0	0	0.0662385	0	0	0	0	0.0307505	0	0	0	0	0	0.0671663	0	0	0	0	0	0	0	0	0	0	0	0	0	0.104652	0	0	0.0268378	0	0	0	0	0	0	0	0	0	0.0708667	0	0	0.0300841
AC004233.3	5.14951	1.06487	1.22744	1.3092	1.34724	0.909371	5.74102	1.50433	0.277831	2.4887	1.95799	2.02236	7.51698	1.76768	2.42459	1.81927	1.89396	0.935295	1.77501	0.851678	7.2181	1.10693	1.81342	1.7173	0.745406	1.50777	2.64584	2.0932	1.12345	0.553062	4.16274	1.55869	2.34792	0.498837	0.961897	0.653837	0.492219	2.72139	1.24667	0.794907	2.04297	1.49611	11.122	2.03654	1.22013	0.790088	4.42701	0.774062	3.01865
AC023866.2	0	0	0	0	0	0	0	0	0	0	0	0	0	0	0	0	0	0	0.0454718	0	0	0	0	0	0	0	0	0	0	0	0	0	0.094466	0	0.0415017	0	0	0	0	0	0	0	0	0	0	0	0.0394469	0	0
AC012506.2	0.038194	0.0367435	0.0283725	0.114387	0	0	0.0872463	0	0.115039	0.0338586	0.079461	0.0237191	0.393006	0	0.359063	0.0335769	0	0.104382	0.0990483	0.0623916	0.171853	0	0.0445104	0	0.295785	0.0394482	0	0.0889933	0	0.0572506	0.0780386	0	0	0	0.060267	0	0	0.0526769	0	0	0.364802	0.181736	0.103979	0.0277069	0.0837971	0	0.0859247	0.0511926	0.118305
AC098851.1	0.0714296	0	0.0265308	0.0802212	0.0245851	0	0.0271943	0.182679	0.026893	0.0316607	0.0495353	0.0221794	0.0848066	0.0317372	0	0.0941921	0.115522	0	0.0617459	0.0291708	0	0.057311	0.166485	0	0.0251441	0.0737751	0	0	0	0.0535343	0	0.0475362	0.0320687	0	0.0281775	0.024672	0.115351	0.0492575	0.0500087	0.0680659	0.170561	0.101963	0.162049	0	0.31343	0.0325738	0.0267824	0.143609	0
LINC01686	0.0147946	0.0142328	0.0769315	0.0332311	0.0916581	0.0474711	0.0337953	0.0504491	0.0779818	0.0131153	0.0102599	0.0459385	0.0351306	0.0525877	0	0.078037	0.143563	0.0269551	0.0127889	0.0241677	0.0443787	0.0593519	0.0862066	0.0307527	0.0624947	0.0305609	0.221827	0.0459626	0.113544	0.077617	0.0302286	0.0196916	0	0.0383372	0.0700341	0.0408809	0.0119459	0.0816185	0.0517895	0.0281959	0	0.0422378	0.0537023	0.0321972	0.0540986	0.0674675	0.133133	0.0793188	0.16039
AC015712.1	0	0.0529663	0	0	0.00947498	0.0147217	0	0.0469358	0	0.0366057	0.00954535	0.0256435	0	0.0733882	0	0.0968032	0	0	0	0.0224846	0	0.0220874	0	0.0429165	0	0.0568652	0.0687929	0.0427617	0.0660231	0.0103159	0	0.0183202	0.0247183	0	0.0108595	0	0	0.0189836	0.00963656	0.0262323	0	0.0130988	0	0.0499249	0	0.0125538	0.0103218	0	0.0106586
AL022316.1	0.498259	0	0.079314	0	0.0244991	0	0.0812977	0.03034	0.0803969	0.0631001	0	0	0.02817	0.0316262	0	0.12515	0.115118	0	1.19983	0.0290688	0	0.342664	0	0	0	0	0.237167	0.110567	0	0.0266736	0.0242393	0.04737	0.0319566	0	0.0280789	0	0.0862107	0.147256	0	0	0	0.033869	0.0322965	0	0.0260279	0	0.0266887	0	0.192917
AC008738.4	0	0	0	0.0217743	0	0	0	0	0	0	0	0.0180604	0	0	0.105154	0	0	0	0	0	0.021809	0	0	0	0	0	0	0	0	0	0.0198069	0.038708	0	0	0	0	0	0	0	0	0	0	0	0	0	0	0	0	0
Z98742.1	0	0	0	0	0	0.0344516	0	0	0	0	0	0	0	0	0	0	0	0	0	0	0	0	0	0	0	0	0	0	0	0	0	0	0	0	0	0	0	0	0	0	0	0	0	0	0	0	0	0	0
AL391244.1	4.25692	3.61437	5.2824	2.43872	2.7361	4.29432	9.91435	3.05164	2.94438	2.60872	3.87464	4.0305	3.05035	4.67121	7.6902	4.86926	4.00301	4.0836	7.45719	3.11475	12.5395	5.31733	12.0359	3.54446	6.11314	3.03939	4.83539	5.46659	4.37773	7.02137	4.7168	3.62706	6.47915	3.79536	5.13957	1.53719	6.74426	5.05938	5.55988	6.392	7.08453	5.37842	9.95013	6.40425	7.08725	4.11049	7.95644	6.12712	7.32952
AC091946.2	0.0699568	0.1346	0.20787	0.0523781	0.0963127	0	0	0	0	0.124032	0	0	0.055372	0	0	0.0615	0	0	0.120946	0	0	0.0561294	0	0.0727073	0	0	0	0.0543338	0	0.0524305	0.0476456	0	0.062815	0	0.055193	0	0	0	0	0	0	0	0	0	0	0.0638044	0	0	0.108344
ITFG1-AS1	0.325198	0.0312848	0.0483148	0.0486965	0.0223858	0	0.14857	0.0554457	0.244872	0.057657	0.022552	0	0	0.0288981	0.0705506	0	0	0.0296248	0.112445	0	0	0.0521842	0.151591	0	0.297632	0	0.108354	0.0505148	0.062395	0.0243727	0.0442967	0.0432837	0.0875998	0	0.0513136	0.0449298	0.026258	0	0.0455351	0	0.0517677	0	0.0885316	0	0.0951306	0	0.0975461	0.0435873	0.0251822
Z98949.3	0	0	0	0	0	0	0	0	0.129907	0	0	0	0	0	0.0623795	0.0758326	0	0	0	0	0	0	0	0	0	0	0	0	0	0.0323248	0	0	0	0	0	0	0	0	0	0	0	0	0	0	0	0	0	0.0578086	0
AL162386.2	0.0445458	0	0.0992726	0.0333523	0	0	0.0339185	0	0.0335427	0	0.0926755	0	0.0352588	0.0395847	0.0322135	0	0.0720433	0	0.0770135	0	0	0.035741	0	0	0.0627226	0	0.0742121	0.0691954	0.0854689	0	0.0606777	0.0592902	0	0	0.0702895	0	0.107905	0	0.0623741	0	0	0.0847836	0.0404236	0	0	0	0.0334047	0	0
AP002518.1	0.0106111	0.0102081	0	0	0	0	0.00807962	0.00452293	0.0119851	0.00940663	0.00367933	0	0	0.00942934	0.00383674	0.0233209	0	0.00966648	0	0	0	0.00851376	0	0	0	0	0	0.0041207	0	0.00397636	0	0	0	0	0.00418586	0.00366511	0.0085679	0	0.00742897	0	0	0	0	0.00384879	0	0.00483895	0	0	0.00410844
LINC01562	0.00860415	0.00827739	0.0127832	0.0257684	0.0118457	0.00920263	0.0262058	0.0220049	0.0388732	0.00762748	0.0477348	0.0374032	0.129396	0.0152918	0.0373328	0.0680763	0	0.00783818	0.104128	0.0140553	0.0322618	0.013807	0.0300812	0.0268273	0.00605753	0	0.0143343	0.0200479	0.0247629	0.0451399	0.0117201	0.0572604	0.00772577	0	0.0475182	0.0237752	0.0277895	0.0237335	0.0301193	0.0327959	0	0.0245643	0.00780794	0.018725	0.0251698	0.0313898	0.0129044	0.0115324	0.00666276
AL109935.2	0	0	0	0	0	0	0	0	0	0	0	0	0	0	0	0	0	0	0	0	0	0	0	0	0	0	0	0	0	0	0	0	0	0	0	0	0	0	0	0	0	0	0	0	0	0	0	0	0
AC079340.2	0	0	0	0	0	0	0.039392	0	0	0	0.0358769	0.0160639	0.0204743	0	0.0187059	0.0227401	0.0418345	0.0235643	0.0223603	0	0.0193981	0.0830173	0	0	0.0182111	0	0.0430939	0.0200904	0.124076	0.0387733	0.0528521	0	0	0	0.0204081	0.0357383	0	0.0713514	0	0.0985962	0.0411774	0	0	0.0375293	0.0945867	0.117961	0	0	0
AC012366.1	0	0	0.0319715	0	0	0	0	0	0	0	0.0298469	0	0	0	0	0	0	0	0.0372042	0	0	0	0	0	0	0	0	0	0	0	0.0586252	0	0	0	0	0	0	0	0.0602642	0	0	0	0	0	0	0.0392538	0	0	0
AL138767.2	0	0	0	0	0	0	0.184533	0	0	0	0	0	0	0	0.175257	0	0	0	0	0	0	0	0	0	0	0	0	0	0	0	0	0	0	0	0	0	0	0	0	0	0	0	0	0	0	0.110518	0	0	0
AC011491.2	0.0455423	0.0438128	0.0338312	0	0	0	0.0693546	0	0	0	0	0	0.0720951	0	0	0	0	0	0.0393682	0.0371977	0	0	0	0	0.128252	0	0	0.0353717	0	0	0	0	0	0	0	0	0	0	0.0318847	0	0	0	0	0	0	0	0	0	0.0352664
AC073188.6	0	0	0.00519675	0	0.00963127	0	0.00532672	0.00596374	0	0	0.0048514	0	0.0055372	0	0.0101179	0.01845	0.011314	0.0063729	0	0.00571387	0.0157384	0.0112259	0	0	0.00492513	0	0	0	0	0.0262153	0.00476456	0	0.0188445	0.00604262	0.0331158	0	0.00564863	0	0	0	0.0111363	0.00665741	0	0.0152245	0.00511613	0	0.0104921	0	0.0162516
AC087481.3	1.49402	0.816874	0.926195	0.877181	1.53157	0.448344	2.00511	0.458144	0.65557	1.03859	0.551584	0.574042	1.53135	0.859618	2.19191	0.973252	0.695328	0.528742	1.65384	0.632086	1.74103	1.39707	2.48013	0.949533	1.86151	0.688282	0.841606	0.934978	1.71168	1.11167	1.12002	0.600853	0.675576	0.584896	1.11088	0.408377	1.6316	0.681907	0.760032	1.04471	1.30037	0.98195	1.19971	0.693946	1.79221	0.862673	1.47501	0.749131	1.19854
AC027228.1	0.0626382	0	0	0	0	0	0	0	0	0	0	0.0388993	0	0	0	0	0	0	0	0	0.0469732	0	0	0	0	0	0	0	0	0	0	0	0	0	0.0494189	0	0	0	0	0	0	0	0	0.0454394	0	0	0	0	0
LINC01592	0.0143362	0	0	0	0	0	0.00545801	0	0	0	0	0	0	0	0	0	0	0	0	0	0.00537545	0	0	0	0	0	0.0238837	0	0	0	0	0	0	0	0	0	0	0	0	0	0	0	0	0	0.00524223	0	0	0	0
AL136985.1	0	0	0	0	0	0	0.392424	0	0	0	0	0	0.0407931	0	0	0	0	0	0	0	0	0	0	0	0	0	0	0	0	0	0	0	0	0	0	0	0	0	0	0	0	0	0	0	0	0	0	0	0
AC009704.2	0.547922	0.0405472	0	0.126228	0.0870404	0.0450796	0.160463	0.0718613	0.158685	0.298909	0.292289	0.0785234	0.366969	0	0.121918	0.111158	0.408991	0.115187	0.218603	0.103276	0	0.169085	0.147354	0	0.0593462	0.0870638	0.140434	0	0.040434	0.0631772	0.0861172	0	0.0378451	0	0.0665058	0.116464	0	0.11626	0	0	0.201283	0.0401098	0	0.0611503	0.123296	0	0.0632131	0	0
AC006042.1	1.0101	0.186873	0.0288598	0.0290878	0.294177	0	0.266234	0.0662385	0.234031	0.206641	0.161652	0.0482529	0.0922515	0.0345233	0.168568	0.409843	0.314158	0	0.302248	0.253853	0.145671	0.187026	1.2677	0	0.164108	0.0401258	0.453062	0.241392	0.0372703	0.0582339	0.529193	0.103418	0.0697678	0.0671146	1.19539	0.268378	0.250954	0.160745	0.163196	0.0740412	0.680291	0.184857	1.33969	0.281828	0	0.2126	0.116534	0.156216	0.631767
AL008636.1	0	0.019238	0.0148551	0.0149725	0.0137657	0	0.0152267	0	0	0	0	0	0	0	0	0	0	0	0	0	0	0.0160448	0.0233046	0	0	0	0	0.0310632	0	0	0	0	0	0	0	0	0	0	0	0	0	0.0190305	0	0	0.0146247	0	0.014996	0	0
AP003122.2	0	0.0402969	0	0	0	0	0	0	0	0	0	0	0	0	0	0	0	0	0	0	0	0	0	0	0	0	0	0	0	0	0	0	0	0	0	0	0	0	0	0	0	0.0398623	0	0	0	0	0	0	0
LINC01620	0	0.0220048	0	0.0342517	0	0.048929	0	0.0194994	0	0	0	0.071024	1.30354	0	0.0165411	0	0	0.0208372	0.0988628	0.0560473	0.0343063	0.110114	0	0.0237728	0.0161035	0	0	0.0355307	0.109717	0	0	0.121778	0	0.0790293	0	0	0.0369382	0.157735	0.0800701	0.0435928	0.0364119	0.043535	0.0415137	0.116151	0	0	0	0.0613161	0.0177125
AC090515.5	0.116107	0	0.0287501	0	0	0.0413943	0	0.0329933	0	0.0343092	0	0	0.0306336	0	0	0.0340238	0	0	0	0	0	0	0	0	0.0272474	0	0	0	0	0	0.0263591	0	0	0	0	0.0267358	0	0	0	0	0.0616095	0	0.105363	0	0.0283041	0	0	0	0
ERVMER61-1	0	0	0	0	0	0	0.161803	0	0	0	0	0	0.0874624	0	0.030734	0	0	0	0	0.0416552	0.0127485	0	0	0	0	0	0.339857	0	0	0	0	0	0	0	0.0201184	0	0	0	0.166626	0	0	0	0	0	0	0	0.0063741	0	0.243537
AC104417.2	0	0.0109226	0	0	0	0	0	0	0	0	0	0	0	0	0	0	0	0	0	0	0	0	0	0	0	0	0	0	0	0	0	0	0	0	0	0	0	0	0	0	0	0	0	0	0	0	0.0085142	0	0
LINC02281	0	0	0	0	0	0	0	0	0	0	0	0	0	0	0	0	0	0	0	0	0	0	0	0	0	0	0	0	0	0	0	0	0	0	0	0	0	0	0	0	0	0	0	0	0	0	0	0	0
AC130324.1	0.0734925	0.0235672	0.109188	0.0183418	0	0.104806	0.0746126	0.0208839	0.276697	0.304035	0.050966	0.0912799	0.096951	0.0217692	0.141724	0	0.0396195	0.0223167	0.127058	0.120053	0.918549	0.235865	0.171293	0.0254607	0.0517405	0.101208	0.0816243	0.0570799	0.141008	0.0918007	0.0333691	0.0652121	0.0659898	0	0.135293	0	0.118682	0.135147	0.068604	0.0933757	0	0	0.0222305	0	0.268735	0.178744	0.0183706	0	0.0758801
AC093297.2	4.3675	1.67287	2.85988	1.2959	3.34609	1.94637	2.10002	1.42035	1.91232	1.67059	1.80045	2.28535	1.74768	1.96211	1.90088	1.95532	1.33422	1.90093	4.66332	2.24605	2.64446	1.73265	1.95108	1.48786	2.67624	1.57047	1.68429	1.70235	2.26566	1.50936	6.50002	1.19492	2.62168	1.66968	2.14404	1.37446	6.35427	1.4836	1.9479	2.05009	2.87114	1.54707	3.6404	1.83057	2.40739	1.95482	3.99086	1.84289	1.54697
AC074344.2	0	0	0	0	0	0	0	0	0	0	0	0	0	0	0	0	0	0	0	0	0	0	0	0	0	0	0	0	0	0	0	0	0	0	0	0	0	0	0	0	0	0	0	0	0	0	0	0	0
AC097505.1	0.144123	0	0.133828	0	0.074408	0.038537	0.10974	0.0307159	0	0.0319409	0.0499737	0.111878	0	0	0	0	0	0	0.124585	0.058858	0.02702	0.0867273	0	0	0.0760997	0	0	0	0.0345657	0.0810121	0.245396	0.0959137	0.0323525	0.0622443	0.0284268	0.0248903	0.261836	0	0.0504512	0	0	0.0342886	0	0	0.079051	0.0328621	0.135097	0.0482932	0
LINC02012	0.731687	0.124885	0.280534	0.194391	1.03984	0.1136	0.368424	0.0301817	1.173	0.272007	0.106393	0.102604	0.541779	0.220228	0.213356	0.134872	0.0954313	0.0322524	1.98929	0.279533	0.460201	0.284063	0.563876	0.441555	1.91926	1.51143	0.373556	0.971583	1.32462	0.229965	0.297391	0.141368	0.78415	0.152904	0.148973	0.138592	0.724203	0.667332	0.0908854	0.404844	0.0939321	0.134769	0.267733	0.128416	1.19104	0.236797	0.53099	0.253084	2.99746
AL359643.2	0.0186594	0.0538524	0.060065	0.0325983	0.0813494	0	0.0473595	0.0265116	0.10772	0.0661654	0.0776402	0.0502137	0.0393847	0.0386897	0.0359831	0.0382754	0.0301776	0.0113322	0.0430127	0.0762024	0.0746289	0.0648755	0.108726	0.0258574	0.00875779	0.0128481	0.0725342	0.0628001	0.0477351	0.0559387	0.114376	0.0745067	0.0502635	0.118194	0.029443	0.0472635	0.0401772	0.0428915	0.126282	0.071123	0.0198024	0.0295953	0.0225769	0.031584	0.109169	0.085092	0.0652989	0.0333464	0.0385312
AC005674.1	0	0.170669	2.73458	0.431691	0.396897	0.0948733	0.0675414	0.113428	0.0333965	0.353855	0.153786	0.275431	0.0702103	0.197061	0.898048	0.0779804	0.0717294	0.0808067	0.306712	0.0724504	0.13304	0.391438	0.103373	0.276573	0.437145	0.183232	0	0.378916	10.3392	0.332403	2.53736	0.354191	0.0796478	0	0.104975	0.18383	1.25341	0.122339	0.124205	0.0845263	0	0.126621	0	0.353912	0.0973068	0.404511	0	0.118892	0.137378
AC021736.1	0	0.104357	0	0	0	0.0773479	0	0	0	0	0	0.0224552	0.0286203	0.0321318	0.0261484	0	0	0	0.125027	0	0.0813479	0.0290118	0	0.0375805	0	0.0373462	0	0	0	0.0541999	0	0	0	0	0.114111	0.0249787	0	0	0.0253152	0.137824	0.0575605	0.0344104	0	0	0	0.0329788	0.0542308	0	0
SNHG27	0	0.0163475	0	0	0.175461	0	0.194083	0.0144862	0	0	0	0.0211056	0.847358	0	0.921634	0	0	0	0.866659	0.0416378	0	0	0.435667	0	0	0	0	0	0	0	0	0	0	0	0	0	0	0	0	0	0.0270506	0	0	0	0	0	0	0	0.039476
AC106745.1	0	0	0	0	0	0	0	0	0	0	0	0.0272463	0	0	0	0	0	0	0	0	0	0	0	0	0	0	0	0	0	0	0	0	0	0	0	0	0	0	0	0	0	0	0	0	0	0	0	0	0
RBMS3-AS1	0	0	0	0	0.0252951	0	0	0	0	0	0	0	0	0.0326538	0	0	0	0	0	0	0	0	0	0	0	0	0	0	0	0	0	0	0	0	0	0	0	0	0	0	0	0	0	0	0	0	0	0	0
ARHGEF7-AS2	0	0.0158065	0	0	0.0113103	0	0	0	0	0	0.0113943	0.0102036	0	0	0	0	0.0265729	0.089807	0	0.01342	0.0123215	0.0131829	0.0957388	0.0170765	0.0462699	0	0.0273728	0.0638061	0.0157624	0.0246284	0	0	0.0295063	0	0.012963	0	0.0265335	0.0226608	0.0115032	0	0.0523109	0.109452	0.238561	0.0476765	0.0120161	0.0149855	0.332672	0	0
AL031722.1	0.0925337	0.979215	0.756127	0.762101	1.01916	1.18764	0.986412	0.946609	0.696773	0.902331	0.962562	1.72395	2.70996	1.80902	0.334581	0.813477	0.748268	1.18015	0.479934	0.604632	2.91447	1.33639	0	1.15406	0.390876	0.477861	0	0.790557	2.57436	2.4273	0.189066	1.35478	0	0.399637	1.3871	0.511383	1.49432	1.40384	0.906976	1.76353	1.47303	1.14477	2.6031	2.2823	1.01509	1.9411	0.346954	0.372077	0.358275
AC130895.1	0	0	0.0306745	0	0	0.0441652	0	0	0	0	0	0	0	0	0	0	0	0	0	0	0	0	0	0	0	0	0	0	0	0	0	0	0	0	0.0325784	0	0	0	0	0	0	0	0	0	0	0	0	0	0
AL023881.1	0.473428	0.260257	0.100482	0.151914	0.279339	0.072337	0.0514975	0.403593	0.356488	0.359733	0.187609	0.252005	0.428259	0.240401	0.195635	0.17837	0.76567	0.431282	0.233855	0.220962	0.152156	0.271323	0	0.210875	0.09523	0.349267	0.112674	0.157586	0.389295	0.152066	0.0921253	0.270056	0.0607281	0.116837	0.0533593	0.420489	0.0546097	0	0.0473504	0	0.430652	0.0643623	0	0.147187	0.197846	0.308423	0.101435	0.3626	0.157117
AL592463.1	0	0	0	0	0	0	0	0	0	0	0	0	0	0	0	0	0	0	0	0	0	0	0	0	0	0	0	0	0	0	0	0	0	0	0	0	0	0	0	0	0	0	0	0	0	0	0	0	0
AC103702.1	0	0	0.00575001	0	0	0	0	0	0	0.00686184	0	0	0.0122534	0	0	0	0	0	0.00669109	0	0	0.00621051	0	0	0	0	0	0	0.00742572	0	0	0	0	0	0	0	0	0.0106756	0	0	0.0123219	0.00736618	0	0	0	0	0	0	0
AC087627.1	0.0410019	0	0.16752	0.0153495	0.0423369	0	0	0	0.0771853	0	0.0142171	0	0	0	0	0	0	0	0	0	0	0.0328976	0.0716739	0	0.0432994	0	0	0	0.0393346	0	0.167551	0.0272866	0.165672	0	0.0323488	0	0.0165534	0	0.0861177	0	0	0.0390192	0	0.0148719	0.0149929	0	0	0	0.127002
AC090791.1	0	0	0	0	0	0	0	0	0	0	0	0	0	0	0	0	0	0	0	0	0	0	0	0	0	0	0	0	0	0	0	0	0	0	0	0	0	0	0	0	0	0	0	0	0	0	0	0	0
AL023803.1	0.435453	0.837831	0.727822	0.407541	0.52457	1.51366	0.994701	0.742438	0.49184	1.06157	0.679455	0.878874	0.775504	0.870651	0.47235	0.191406	0.352126	0.0991719	0.846942	0.444582	1.30621	0.436728	0.888067	0.113143	3.90876	0.224876	0.362726	0.169103	3.96859	0.571128	4.59691	1.01427	0.293249	0.376129	0.343554	0.0752034	0.351605	0.150143	0.762164	0.414947	0	0.207198	0.493946	0.315889	0	0.297867	0.571453	0.583651	0.3372
AC023403.1	0	0	0	0	0	0	0	0	0	0.0183587	0	0	0	0	0	0	0	0	0	0	0	0	0	0	0	0	0	0	0	0	0	0	0	0	0	0	0	0	0	0	0	0	0	0	0	0	0	0	0
AC010343.3	0	0	0.0154469	0	0	0	0	0	0	0.0184337	0.0288408	0	0.0329178	0	0	0	0.03363	0	0.0179751	0	0.0155938	0	0	0	0	0	0	0	0	0	0	0	0	0	0.147651	0	0	0	0	0	0	0	0	0	0.0152073	0	0	0	0
AL732314.6	0.336486	0	0.0937347	0.0944753	0.144768	0.0899728	0.160132	0.143426	0.063343	0.111859	0.116674	0.0522408	0.299627	0	0.212915	0.258834	0	0	0.363586	0.0687082	0.0630838	0.0674944	0.196067	0.174858	0.0888354	0.130326	0.210216	0.0653353	0.080701	0.0945699	0.257818	0	0.0377669	0.0726612	0.199105	0.116223	0.169809	0.290049	0.0883418	0.0801603	0.133911	0.080054	0.152674	0.274608	0.123041	0.115085	0.157706	0	0
P4HA2-AS1	0.0485278	0	0	0	0.0167026	0	0.0554258	0	0	0.0215097	0.0336533	0	0.0384106	0	0	0	0	0	0.0209745	0	0.0181958	0.019468	0.0282766	0	0	0	0.040423	0.0188452	0.0698318	0	0.0165255	0	0	0	0.0191432	0	0.0195918	0	0.0169875	0	0.0772505	0	0	0	0.0532346	0	0.0181954	0.0325217	0
KC6	0	0	0.00291941	0.00588495	0.00270531	0.00840673	0.203485	0.0134012	0	0.0209034	0.0218032	0.0610148	0	0.0104769	0	0.0794632	0	0	0.0373694	0.00320992	0.141464	0.0220725	0.201517	0.0326762	0	0.0284134	0.0589255	0.0152617	0	0.020618	0	0.0104616	0	0.0101838	0.232546	0.0162892	0	0.124665	0.110058	0.0449393	0.0500488	0.0299198	0	0.0313602	0	0.0179219	0	0.0052675	0.00912978
AC008750.7	0.0364176	0	0	0	0.0250689	0	0	0	0	0	0	0	0	0	0.0263355	0	0	0	0.0944414	0	0.02731	0.0292194	0	0.0756988	0	0	0	0.0282847	0	0	0	0	0	0	0	0	0.0588104	0	0	0	0	0	0	0.0264182	0.0266332	0	0.0273094	0	0.0282005
AC092611.1	0.00793662	0.0152704	0.0117914	0.0297115	0.0218534	0	0.0302159	0	0	0	0.0165118	0	0.0439738	0	0.0172182	0.00697719	0	0	0.020582	0.00648241	0	0.0318395	0.00924915	0.0329947	0.0223503	0	0	0	0	0	0.0162162	0	0	0.00685537	0.0250466	0	0.00640839	0.0109461	0.0611217	0.0302515	0.0379024	0.0226585	0	0.0230297	0.0174128	0.00723862	0.0119033	0.0425508	0
AC090541.1	0.174368	0	0	0	0	0	0	0	0.262595	0	0	0	0	0	0	0.191611	0	0	0	0	0	0	0	0	1.22759	0	0	0	0	0	1.00943	0	0	0	0.171961	0	0	0	0	0	0	0	0	0	2.7098	0	0	0	0
AL161937.2	0.0573987	0.0368126	0.0568516	0.157577	0.210729	0.081855	0.378778	0.0326212	0.864417	0.271378	0.172489	0.273282	0.969218	0.255031	0.415082	0.11774	0.18566	0.174296	0.165391	0.109391	0.157828	0.138161	0.156079	0.0198852	0.0808202	0.177851	0.0637498	0.104021	0.752552	0.215093	0.104247	0.0763974	0.326414	0.132211	0.467947	0.0528685	0.139039	0.105552	0.0937663	0.218783	0.213201	0.0910388	0.121537	0.055518	0.0139924	0.069801	0.746081	0.0512889	0.311133
AC011290.1	0	0.0946102	0	0	0	0.0525928	0	0.167676	0	0.0871818	0	0.0305369	0.0389209	0.0873922	0	0	0	0	0	0.0401627	0	0	0.114609	0.0511059	0.207712	0	0	0.0763823	0.0943461	0.11056	0.06698	0.0654484	0.132458	0.0424735	0.116385	0.0339687	0.0794083	0	0	0.093714	0.0782768	0	0	0	0	0.044848	0	0.197722	0
AC087276.1	0.222485	1.07018	0.0826368	0.249869	0.0765765	0	0.169407	0	0.251295	0.295846	0.15429	0.20725	0.440253	0.395414	0.0804457	0.97795	0	0.202679	0.384646	0	0.417112	0.446274	1.03712	0.115617	0.0783176	0.574478	0.185327	0.172799	0.320158	0.250119	0.0757643	0.296127	0	0	0.0877659	0.307389	0.0898225	0	0.155765	0.636026	0	0.529318	0.302846	0.403492	0.406774	0.101459	0.750785	0	0.172285
MYLK-AS1	0.602414	0.19984	0.416641	0.0311062	0.27169	0.0888711	0.411245	0.053126	0.484897	0.0736597	0.187274	0.0774016	1.16739	0.239972	0.510748	0.182617	0.134383	0.0189236	0.341178	0.0678668	0.233668	0.116669	0.580997	0.107948	1.09685	0.08582	0.242249	0.0806691	0.298923	0.124549	0.509322	0.110594	0.50361	0.0179429	0.376946	0.0430501	0.234822	0.0286498	0.61082	0.158357	0.0992038	0.0988421	0.433564	0.0602767	0.334219	0.018946	0.451748	0.055685	0.99732
URB1-AS1	3.72362	1.5083	5.04084	1.61408	4.03036	1.8341	0.820738	1.14861	5.10967	3.08378	1.9537	1.85602	6.94169	2.15515	1.54125	2.13207	1.30744	1.49522	1.54588	2.28101	4.33555	2.49624	1.85567	1.27303	6.32959	1.74583	4.93827	2.5686	8.24898	3.61695	1.63509	3.58666	2.66159	1.56585	2.8798	1.2523	3.34289	1.95963	4.11624	2.14764	2.26183	2.37792	1.37829	3.25211	2.13197	2.25665	3.58227	2.42977	0.644981
AC011257.1	0	0.069695	0	0	0	0.0774855	0	0	0	0	0	0	0	0	0	0	0	0	0	0	0	0	0	0	0	0	0	0	0	0	0	0	0	0	0	0	0	0	0	0	0	0.0689433	0	0	0	0	0	0	0
LINC02432	0	0.0208899	0.012098	0.0365808	2.20105	0.0987062	0.0124006	0.00925573	0.00817547	0.0240622	0.0225881	0.0943956	0	0.149546	0	0.0143172	0.0438984	0.0346176	0.0281561	0.283774	2.7805	0.178581	0.00632642	0.0338525	0	0.0168207	0	0	0.0052079	0.0528919	0.0036973	0.130059	0.00974889	0.187563	0.209866	0.127505	0.01315	0.0748714	0.00380066	0.75526	0.648132	0.0154984	0.00985258	0.0708854	0.250117	0.0247561	0.00814185	0.0218285	0.00420375
CSNK1G2-AS1	0.0453732	0.0873	0.0224703	0	0	0	0.0230323	0.0128934	0	0.0134076	0	0	0	0	0.0109373	0	0	0	0.013074	0	0	0	0.0352512	0	0	0	0	0	0	0	0	0	0	0	0.0119325	0	0.0122121	0.0208594	0.0105888	0	0	0	0.0137248	0	0	0.0275885	0	0.0202717	0.0117118
LINC01501	0	0	0	0	0	0	0	0	0	0.0305875	0	0	0	0	0	0	0	0	0.0298264	0	0.0129375	0.0276841	0	0	0	0	0.0287415	0	0	0	0	0	0	0	0	0	0	0	0	0	0	0	0	0	0	0	0	0	0.0133594
AC118345.1	0	0	0	0	0	0	0	0	0	0	0	0	0	0	0	0	0	0	0	0	0	0	0	0	0	0	0	0	0	0	0	0	0	0	0	0	0	0	0	0	0	0	0	0	0	0	0	0	0
RHOXF1-AS1	0.146867	0.00784942	0.139406	0.0427632	0.0336998	0.0436341	0.180169	0.0208671	0.00614389	0.0144662	0.0735585	0.0658715	0.348744	0.0145012	0.082606	0.0573835	0.0923714	0.0222988	0.973333	0.0266571	0.0979	0.0785586	0.0665605	0.0593606	0.109142	0.0505633	0.0815589	0.0633713	0.101758	0.134533	0.394551	0.0977397	0	0.0140954	0.0708107	0.011273	0.0527055	0.0562661	0.0456993	0.0933008	0.0129886	0.116471	0.0740424	0.0651085	0.0298356	0.0148834	0.0611862	0.0218723	0.107411
AC018953.1	0	0	0	0	0	0	0.0849357	0	0	0	0	0.0173182	0	0	0.0403331	0	0	0	0	0	0	0	0	0	0	0	0	0	0	0	0	0	0	0	0	0	0	0	0.0585718	0	0	0	0	0	0	0	0	0	0.0215946
LINC02173	0	0	0	0	0	0	0	0	0	0	0	0	0	0	0	0	0	0	0	0	0	0	0	0	0	0	0	0	0	0	0	0	0	0	0	0	0	0	0	0	0	0	0	0	0	0	0	0	0
AL513128.1	0.043406	0	0	0	0	0	0	0	0	0	0	0	0	0	0	0	0	0	0	0.0354528	0	0	0	0	0	0	0	0	0	0	0	0	0	0	0	0	0	0	0	0	0	0	0	0	0	0	0	0	0
A1BG-AS1	0.123908	0.525894	0.14619	0.605752	0.406407	0.257258	0.860228	0.323106	0.0219535	0.303685	0.500408	0.461694	0.484609	0.421003	0.326795	0.717654	0.730854	0.710465	0.856882	0.238129	0.683239	0.807033	0.942847	0.575723	0.528538	0.368875	0.412856	0.57176	0.188794	0.409701	0.0694981	0.261934	0.392678	0.302196	0.488793	0.372597	0.447279	0.321682	0.556219	0.500076	0.440906	0.575712	1.18395	1.14209	0.271853	0.584999	0.224098	0.371234	0.553126
AC093248.1	0	0.0469648	0	0	0	0.0522144	0.111516	0.0416175	0	0.0865546	0.0338551	0.0606344	0.309127	0.130145	0.105911	0	0	0.0444728	0	0	0	0.0783388	0	0	0	0.0504218	0	0	0.0468337	0.0731764	0	0	0	0	0.308128	0	0.0394185	0.0673304	0.205072	0.0930398	0	0.232291	0.0443012	0.177072	0	0	0.146436	0	0.113411
NAV2-AS3	0.0340425	0.0654993	0.0252885	0	0.0937358	0	0.025921	0	0.0256338	0	0	0	0	0.0302511	0.73854	0	0	0	0.205992	0.027805	0.0510578	0	0.0793447	0	0	0	0	0	0	0.0510277	0	0	0	0	0.0268581	0	0.0274875	0	0.0476671	0	0.0541916	0	0.0308923	0	0	0.0310486	0	0	0
AC012467.1	0.159042	0.153002	0.118145	0.416774	0.985324	0.34021	0.484399	0.067791	0.658668	0.422968	0.110294	0.246919	1.13296	1.69595	0.287531	0.489357	0.514434	0.217326	0.824886	0.324753	0.119268	0.127607	1.01939	0.330591	0.335909	0.0821324	0.13248	0.432336	0.762877	0.47679	0.162479	0.105842	0.357015	0.0686876	4.26624	0.219735	0.192627	0.21935	1.61454	0.454659	0.126588	0.681084	0.144325	0.34612	0.116312	0.362638	1.19265	0.319754	0.554206
AC104241.1	0	0	0	0	0	0	0	0	0	0	0	0	0	0	0	0	0	0	0	0	0	0	0	0	0	0	0	0	0	0	0	0	0.029107	0	0	0	0	0	0	0	0	0	0	0	0	0	0	0	0
AC008771.1	4.73015	0.916316	0.407745	0.652711	1.74474	0.777006	2.58141	1.23862	3.48884	1.47407	1.02999	1.32338	2.08284	0.94683	2.475	1.30569	0.652732	1.04418	2.20493	0.791152	2.46972	1.17872	1.27933	0.637587	3.46653	0.967091	4.38393	1.54224	0.665959	1.07684	2.27599	1.59007	0.942225	0.599614	1.89779	0.613376	3.78024	1.66991	2.47525	1.01532	1.61904	1.2137	0.791097	0.948605	2.45574	0.839273	2.95392	0.930439	2.12521
CA3-AS1	0.98791	0.592047	2.61065	0.873051	0.568567	0.415722	1.1715	0.607476	0.207313	0.717845	0.426784	0.734197	0.615303	0.546879	0.433332	0.669161	0.602424	0.840949	0.573986	0.714302	0.0607251	0.467789	0.283103	0.58912	1.04897	0.56872	0.566598	0.855336	3.24717	0.788961	0.452235	0.689785	1.0761	0.3777	1.78883	0.190192	1.01999	0.268036	2.30171	0.771631	0.592961	0.801431	0.617256	0.52868	1.30284	0.251106	0.145737	0.477554	1.17886
AL138724.1	0.449061	0.702011	0.528177	0.574378	0.708403	0.860531	0.826327	1.05275	0.972152	1.1445	0.36332	0.42993	0.518349	0.465556	0.270617	0.756653	0.72626	0.613626	0.679318	0.473758	0.898017	0.810677	0.654156	0.719522	1.1197	0.637734	0.903982	0.392372	2.63866	0.336558	0.484251	0.647506	0.806434	0.355559	0.428101	0.336065	0.271944	0.541923	0.89078	0.285276	0.416996	0.623214	0.407506	0.380054	0.889445	0.733809	0.771717	0.326024	0.91281
AC129507.4	0.0471237	0	0.0350059	0.105847	0	0	0	0.120517	0.0709676	0.167098	0.130718	0.0877935	0	0.0837509	0.0681554	0.0414271	0	0.214643	0.162941	0.0384893	0	0	0.0549168	0.0979529	0.0995286	0.0973421	0.157014	0.1098	0	0.141271	0	0.0627213	0	0.0407037	0	0	0.0380498	0.129985	0	0.179618	0.15003	0.17938	0.0855259	0.239293	0.103389	0.128938	0	0.0631613	0.109473
LINC02402	0	0	0	0	0	0	0	0	0	0.0297799	0	0	0	0	0	0.0147661	0	0	0	0	0	0	0	0	0	0	0	0	0	0	0	0	0	0	0	0	0	0	0	0	0	0	0	0	0	0	0	0	0
DMD-AS3	0	0	0	0	0	0	0	0	0	0	0	0	0	0	0	0	0	0	0	0	0	0	0	0	0	0	0	0	0	0	0	0	0	0	0	0	0	0	0	0	0	0	0	0	0	0	0	0	0
AC109361.2	1.04576	0.0670695	0	0.0260993	0.0239957	0	0	0.0297166	0	0	0.0483479	0	0	0.0309763	0	0	0.0563764	0	0	0	0	0	0	0	0	0	0.0580735	0	0	0	0	0	0	0	0	0	0.0562929	0.0961533	0.0488099	0	0	0	0	0	0	0	0.0261403	0	0.0269933
AL158168.1	0	0	0	0	0	0	0	0	0	0	0	0	0	0	0	0	0	0	0	0	0	0	0	0	0	0	0	0	0	0	0	0	0	0	0	0	0	0	0	0	0	0	0	0	0	0	0	0	0
AC097478.2	0	0	0	0	0	0	0.2111	0	0.029823	0	0	0	0	0	0	0.0696362	0.0640541	0	0	0	0	0.0317775	0	0	0	0	0	0	0	0	0	0	0	0	0	0.02736	0	0	0.110914	0	0	0	0	0	0.260684	0	0.118801	0	0
AC103808.2	0.0342718	0	0	0	0	0	0	0	0	0	0	0	0.0813801	0	0	0	0	0	0	0	0.102803	0	0	0	0	0	0	0	0	0	0	0	0	0	0	0	0	0	0	0	0	0	0	0	0	0	0	0	0
AC104964.1	0	0	0.0309254	0	0	0	0	0	0.219434	0.0369052	0.0288703	0.0258533	0.0659029	0	0.0602109	0.109794	0	0.0379246	0	0	0	0.0334021	0	0	0	0	0.138711	0.0970009	0	0.062402	0	0	0	0.0359591	0	0	0	0	0.0291462	0.0793407	0.0662711	0.0396177	0	0	0.0608914	0	0.187312	0	0
AC124276.2	0	0	0	0.0277128	0	0	0	0	0	0	0.0256683	0	0	0	0.0267665	0	0.0598614	0	0	0	0	0	0	0	0.0781752	0	0	0	0	0	0	0.0492648	0	0	0.0292021	0	0	0	0	0	0	0	0	0	0	0	0	0	0
LINC02167	0	0	0	0	0	0.0109469	0.272763	0	0	0	0	0	0.0162024	0	0	0	0	0	0	0	0	0	0	0	0	0	0	0	0	0	0	0	0	0	0	0.0070704	0	0	0	0	0	0	0	0	0	0	0	0	0.0317025
AC021188.1	0.0550201	0.0264653	0.0204359	0.061792	0.0946858	0.0588471	0.0837879	0.0703561	0.103574	0.0243873	0.0763112	0.0170841	0.152423	0.0244462	0.019894	0.0483689	0.533899	0	0.118903	0	0.144411	0.772537	0.192357	0	0.135574	0.0568267	0.229155	0.128198	0.263914	0.0412359	0.0562089	0	0.0741047	0.0237622	0.0651128	0.0380082	0.0444257	0.151766	0.0577803	0	0.0875854	0.0523596	0.0249643	0.0598694	0.241426	0	0.0412594	0.0737451	0.0213028
SNHG6	38.4946	10.6638	13.5824	9.97393	20.5539	8.48587	25.3457	12.1774	19.8035	12.0552	14.0949	10.3308	27.5877	9.63262	12.1952	17.2937	18.3233	10.6185	28.0686	10.3471	13.3075	19.6344	21.1747	7.87268	15.4814	7.9079	21.1322	12.1722	57.6962	12.3453	17.8564	14.493	69.9211	4.99177	14.7088	6.16879	8.71307	8.37575	17.9556	7.87152	8.05617	12.4441	9.00717	9.32017	23.2214	6.90868	17.5552	8.35856	49.8711
LINC02573	0	0	0	0	0	0	0	0	0	0.0208873	0.0163398	0	0	0	0	0	0	0	0	0	0	0	0	0	0	0	0	0	0	0	0	0	0	0	0	0	0.0190249	0	0	0	0	0	0	0	0	0	0	0	0
AL035634.1	0	0	0	0	0	0	0.0416687	0	0	0	0	0	0	0	0	0	0	0	0	0	0	0.0439076	0	0	0	0	0	0	0	0	0	0	0	0	0	0	0	0	0	0	0	0.156234	0	0	0	0	0	0	0
AC089987.2	0	0	0	0	0	0	0	0	0	0	0	0	0	0	0	0	0	0	0	0	0	0	0	0	0	0	0	0	0	0	0	0	0	0.0299048	0	0	0	0	0	0	0	0	0	0	0	0	0	0	0
AL355472.3	0.148957	0	0	0	0	0	0	0	0.0373878	0	0	0	0	0	0	0	0	0	0	0	0	0.0398382	0	0	0.244695	0	0.0827193	0	0	0	0	0	0	0	0	0	0	0	0.173811	0	0.0790404	0	0	0	0	0	0.0372341	0	0.076898
MRGPRF-AS1	0	0	0.00707652	0.0213973	0	0.0101888	0	0.0324838	0	0.0675587	0.0198188	0.0354954	0.150803	0.0423261	0.268667	0	0	0.00867812	0	0.00778071	0.035719	0.030573	0.0444063	0.0198014	0.00670665	0.00983898	0	0.0591901	0	0.114233	0	0.0253586	0	0	0	0.00658074	0.215372	0	0	0.290483	0	0.0634588	0	0	0	0	0	0.0510729	0.0516371
LINC01944	0	0	0	0	0	0	0	0	0	0	0	0	0	0	0	0	0	0	0	0	0	0	0.114058	0.10172	0	0	0	0	0	0.0733523	0	0	0.0439403	0	0	0	0	0.0674922	0	0	0	0	0	0.0354995	0	0	0	0	0
LINC01667	0.0491527	0.015762	0.0365132	0	0.191734	0	6.74922	0	0	0	0	0	0.700294	0	1.51659	0	0	0.00746283	4.90041	0.0334555	0	0	0.181391	0	0	0	0	0	0	0	0	0	0	0	0.252066	0	0	0	0	0	0.195613	0	0	0	0	0	0	0	0.0951554
AC013549.2	0	0	0	0	0	0	0	0	0	0.0369052	0	0	0	0	0.0301055	0	0	0	0.0359869	0	0	0	0	0	0	0	0	0	0	0	0	0	0	0	0	0	0	0	0	0	0	0	0	0	0	0	0	0	0.0322374
AC091180.2	0.0231072	0	0.0171652	0.0692033	0.0318127	0	0.0527835	0.0196986	0.0173995	0.0204843	0.0640979	0.0286998	0.0182897	0	0.0167101	0.0203138	0	0	0.0599236	0	0	0.148319	0.0538571	0	0.048804	0	0.0769919	0.0179468	0.0443352	0	0.0157376	0	0	0.0199592	0.0546918	0.0159626	0.0373156	0	0.0161776	0	0	0.0219898	0.0419378	0.0335251	0.0337978	0.04215	0	0	0.0357868
MYCNOS	0	0	0.0877395	0	0.121958	0	0.115629	0.0143842	0	0	0	0.00523923	0.0133554	0	0	0	0	0	0.080221	0	0	0	0	0	0	0	0.0843305	0.0196575	0.0890286	0.00632295	0.0229836	0	0.053027	0	0	0.00582803	0.108993	0	0.00590654	0.0643143	0	0.0160572	0	0	0.0308495	0	0.00632655	0	0.00653298
AL590648.2	0	0	0	0	0.0062982	0	0	0	0	0	0	0	0	0	0	0	0	0	0.00790902	0	0	0	0	0	0	0	0	0	0	0	0	0	0	0	0	0	0	0	0	0	0	0	0	0	0	0	0.00686111	0	0
AP000941.1	0	0.0564389	0.0326856	0.0219626	0.0100962	0.0156869	0.0223354	0.0375097	0	0.0130019	0.0711981	0.00910826	0	0	0	0	0.0237203	0.0534442	0.0126784	0.0119794	0	0.047071	0.188015	0.0152434	0.0206515	0.0757417	0.0488688	0.0113913	0	0.0109923	0.0499455	0.0390427	0	0	0.0115714	0.0101319	0	0	0.0308051	0	0	0.0139575	0	0.0212792	0	0.0267537	0.0219971	0	0
AC020978.6	0.0171503	0	0	0	0	0	0	0	0	0	0.0118935	0	0	0	0	0	0	0	0	0	0	0	0.0199866	0	0	0	0	0	0	0	0	0	0	0	0	0	0	0	0	0	0	0	0	0	0	0.015642	0.012861	0	0
AC112236.1	0	0	0.0137728	0	0	0	0.832919	0	0	0.0164359	0	0.0115139	0	0.0164756	0	0	0	0	0.0160269	0	0.0556149	0	0	0	0	0	0	0	0.0533597	0.027791	0	0	0	0	0	0.0128079	0	0	0	0.0353348	0	0	0.0168248	0	0	0	0	0.0248503	0.0717854
AP000873.4	0.112472	0.0865605	0.0501299	0.16842	0.0774227	0.0481181	0.239791	0.0575287	0.0508144	0.039882	0.124796	0.0419081	0.338289	0.0799566	0.0162669	0.257077	0.0363799	0.0614756	0.155559	0.0918639	0.168688	0.19853	0.288359	0.0935153	0.110856	0.0696991	0.0749501	0.0698835	0	0.0674355	0.0153203	0.0299399	0.020198	0.0777194	0.0709885	0.139853	0.108978	0	0.125989	0	0.179042	0.149847	0.0408256	0.032636	0.0329015	0.0820644	0.151816	0.0301499	0.104513
AL451048.1	0	0	0	0	0	0	0	0	0	0	0	0	0	0	0	0	0.151723	0	0	0	0.211055	0	0	0	0	0	0	0	0	0	0	0	0	0	0	0	0	0	0	0	0	0	0	0	0	0	0	0	0
MCF2L-AS1	3.40243	1.15525	0.44603	0.749257	2.95228	1.52903	2.56895	0.926223	5.79143	1.97702	1.80435	1.0476	8.3282	1.80394	6.43035	0.95515	1.43348	1.64093	3.08946	1.21436	3.83801	1.00938	3.06547	0.594321	7.1258	1.94903	3.66776	2.06522	2.22177	1.20001	3.21307	1.63639	4.26172	0.987866	10.9857	1.83688	1.29284	0.985842	9.84862	1.63473	1.00133	1.65977	1.2973	0.539273	3.03196	0.964862	0.943402	2.22271	3.89674
AL157402.2	0	0	0	0.0366395	0	0	0	0	0	0	0.0339365	0	0	0	0	0	0	0	0	0	0	0	0	0	0	0	0	0	0	0	0	0	0	0	0	0	0	0	0	0	0	0	0	0	0	0	0	0	0
LINC01397	0	0.0676487	0	0	0	0	0.0535432	0	0.344174	0	0.0243827	0	0.111318	0	0.0254258	0.0309093	0	0	0	0	0	0	0	0	0	0	0	0	0.0337299	0	0	0	0	0	0	0	0.0851685	0	0	0	0	0	0	0	0.0257132	0	0.0527322	0	0
AL109659.1	0	0	0	0	0	0	0	0	0	0	0	0	0	0	0	0	0	0	0.0651762	0	0	0	0	0	0	0	0	0	0	0	0	0	0	0	0	0	0	0	0	0	0	0	0	0	0	0	0	0	0
AC090193.1	0	0.0208344	0	0	0	0	0.148412	0	0	0	0	0	0	0	0	0	0	0	0	0	0	0	0	0	0	0	0	0	0.0415524	0	0	0	0	0	0	0	0	0	0.0151622	0	0	0	0	0	0	0	0.0162404	0	0.150933
BX649632.1	0.0836034	0.0402142	0.0155262	0.0312978	0.115101	0.0670639	0.0318291	0	0.078691	0	0.0434833	0.0389392	0.281238	0.0185731	0.105802	0.0551227	0	0.0571206	0.234875	0.0170712	0.109717	0	0.146144	0	0.0294294	0.0215872	0.174101	0.0486996	0.0601529	0.0469937	0.0284699	0	0.0750684	0	0.0659596	0.0577537	0	0.0288263	0.0292659	0	0	0	0.0569002	0.015162	0.0611415	0.0381254	0.203755	0.028014	0.129479
LINC02595	0.0542865	0	0	0	0	0	0.0413354	0.0462787	0	0.0481243	0	0	0	0	0.078515	0	0	0	0.140781	0	0.0814202	0	0.189792	0	0.114657	0	0.633078	0	0.104158	0	0.0739459	0	0	0	0	0	0	0	0	0	0.0864176	0	0	0	0	0	0.122128	0	0
ISM1-AS1	0	0	0	0.0935093	0	0	0.0950967	0.0532346	0.0470215	0.0553577	0.0866109	0.01939	0.0988543	0	0.0451582	0	0	0	0.107961	0.0255021	0	0.125258	0.0363866	0	0	0.257986	0	0	0	0	0	0.124673	0	0.0269694	0.0492674	0.172553	0	0	0	0	0	0.0891398	0	0	0.0913371	0.170863	0	0.125548	0.169246
LINC01594	0	0	0	0	0	0	0.0253695	0	0	0	0.0231057	0	0	0	0	0	0	0	0.0288013	0	0	0.0267326	0	0	0	0	0	0	0	0	0	0	0	0	0	0	0	0	0	0	0	0	0	0	0	0	0	0	0.0774014
AC092839.1	0	0	0	0	0.0522892	0	0.0289193	0	0	0	0	0	0.15031	0.0337503	0.0274656	0	0.061425	0	0	0	0.0284819	0	0	0	0	0	0	0	0	0.0284651	0.0517346	0	0	0	0.0599297	0.026237	0.122668	0.052382	0.0531809	0	0	0	0	0.0826556	0	0.0692801	0.142406	0	0
AC084211.1	0	0	0	0	0	0	0.0472584	0	0	0	0	0	0	0	0	0	0	0	0	0	0	0	0	0	0	0	0	0	0	0	0	0	0	0	0	0	0	0	0	0	0	0	0	0	0	0	0	0	0
NPHP3-AS1	0	0	0	0.00876818	0.0107486	0.0208758	0.0148617	0.0299502	0.00293941	0.00692105	0.0216569	0.00727264	0	0.00346888	0.00564585	0.0171587	0.0189399	0.0213367	0.0101232	0.00318837	0	0.00313205	0.0136476	0.0162284	0.0054965	0.0161272	0	0.00303186	0.0112347	0.00585131	0.00265865	0.0155871	0	0.00337181	0	0.0053933	0.00630394	0.0107677	0	0	0	0.0111446	0	0.00283179	0.00856449	0.0142413	0	0.00523215	0.0090685
AL358472.2	0.315842	0.331469	0.245288	0.236477	0.681898	0.138195	0.863583	0.293729	1.38372	0.24181	0.328547	0.383369	1.7386	0.446514	0.913609	0.277661	0.325059	0.222332	1.60091	0.304874	0.527537	0.518346	0.535381	0.193972	1.29373	0.237246	0.478349	0.501764	0.812587	0.645583	0.264	0.34395	0.296489	0.260412	0.441738	0.128928	0.614378	0.217803	1.19608	0.492494	0.79988	0.437192	0.781675	0.458239	0.503964	0.484472	1.13041	0.423332	0.289045
AP002498.1	0	0	0	0	0	0	0	0	0	0	0	0	0	0	0	0	0	0	0.836505	0	0	0.0287564	0	0	0	0	0	0.0278365	0	0	0	0	0	0	0	0	0	0	0	0	0	0	0	0	0	0	0	0	0
AL049646.1	0	0.0230584	0	0	0	0	0.0060835	0	0	0	0	0	0	0	0	0	0	0	0	0	0	0.00641038	0	0	0	0	0	0	0.00766469	0	0	0	0	0	0	0	0	0	0	0	0	0	0	0	0	0	0	0	0
AL445644.1	0	0	0	0	0	0	0	0	0	0	0	0	0	0.0240881	0	0	0	0	0	0	0	0	0	0	0	0	0.0903194	0	0	0	0	0	0	0	0	0	0	0	0	0	0	0	0	0	0	0	0	0	0
AL033384.1	0.00630847	0	0.0609213	0	0.00868516	0	0.293011	0	0.061753	0.0223695	0.00874966	0.0156706	0.0399461	0.00560588	0.948895	0.0332752	0.0408104	0	0.00545323	0.00515258	0	0.0101231	0.0367587	0	0.0310892	0.0325781	0.0315292	0	0.00605195	0.014184	0.00859304	0	0.0453156	0	0.0149314	0.00435793	0.0713124	0.0261017	0.00441663	0	0	0.00600343	0.0114494	0.00915265	0.00922711	0	0.0804219	0	0.0439655
AC026770.1	0.0350386	0	0	0	0	0	0	0	0	0	0	0	0	0	0	0	0	0	0	0	0	0	0	0.0364162	0	0	0	0	0	0	0	0	0	0	0	0	0	0	0	0	0	0	0	0	0	0	0	0	0.0271327
AC021915.2	0	0	0	0	0	0	0	0	0	0	0	0	0	0	0	0.0281835	0	0	0	0	0	0	0	0	0	0	0	0	0	0	0	0	0	0	0	0	0	0	0	0	0	0	0	0	0	0	0	0	0
AP003500.1	0	0	0	0	0	0	0	0	0	0	0	0	0	0	0	0	0	0	0	0	0.0289683	0	0	0	0	0	0	0	0	0	0	0	0	0	0	0	0	0	0	0	0	0	0	0	0	0	0	0	0
LINC00293	0	0	0	0	0	0	0	0.00906713	0	0	0	0.00660515	0	0.00945151	0.00769152	0	0	0	0.00919414	0	0	0	0	0	0	0	0	0	0	0	0	0	0	0	0	0	0	0	0.00744644	0	0	0	0	0	0	0	0	0	0
AC020908.2	0	0	0	0	0	0	0	0	0	0	0	0	0	0	0	0	0	0	0	0	0	0	0	0	0	0	0	0	0	0	0	0	0	0	0	0	0	0	0	0	0	0	0	0	0	0	0	0	0
AC025766.1	0.0497736	0.0957668	0.0739488	0.0745331	0.0342628	0	0.189496	0	0.0749584	0	0	0	0.196984	0	0.0719881	0	0.0804983	0	0	0	0.0746518	0.239613	0.11601	0	0	0	0.0829216	0	0	0.0373039	0	0	0	0	0	0	0.0401895	0	0	0	0.158467	0	0	0	0.0728017	0	0.1493	0.0667131	0
AL121820.1	0	0	0.0328038	0	0	0.0472309	0.0672484	0	0	0.0391467	0	0.0548471	0	0.117724	0.223538	0	0	0	0.114518	0	0.132462	0.106293	0.102924	0	0.0621784	0.0456093	0	0	0.0423636	0.0330961	0	0	0	0	0.104519	0	0	0	0.0618329	0	0	0	0	0.0320343	0.0645898	0.0402756	0.0331149	0	0
AC009478.1	0	0	0	0	0	0	0	0	0	0	0	0	0	0	0	0	0	0	0	0	0	0	0	0	0	0	0	0	0	0	0	0	0	0	0	0	0	0	0	0	0	0	0	0	0	0	0	0	0
LINC00583	0	0	0	0	0	0	0	0	0	0.0466321	0	0	0	0	0	0	0	0	0	0	0	0	0	0	0	0	0	0	0	0	0	0	0	0	0	0	0	0	0	0	0	0	0	0	0	0	0	0	0
AC113398.2	0	0	0	0	0	0	0	0	0	0	0	0	0	0	0	0	0	0	0	0	0	0	0	0	0	0	0	0	0	0	0	0	0	0	0	0	0	0	0	0	0	0	0	0	0	0	0	0	0
AC087286.2	0.0616892	0.178039	0.0229129	0.0461879	0.169861	0	0	0.157768	0.0696773	0	0.128342	0.0191549	0	0.164456	0	0	0.0997691	0	0.053326	0	0	0.0494959	0.107837	0	0.0434307	0.0637148	0	0.0239563	0	0	0.0420147	0	0.0276957	0	0.0243351	0	0	0	0.129568	0.0587842	0.0491009	0.0880593	0.0839708	0	0.0225575	0.0281319	0	0	0.023885
AC006960.2	0	0.626993	0	1.03336	0.0791723	0.0410046	0	0.424875	0	0	0.0531735	0.166659	0.182071	1.32866	0.138621	0	0.18601	0	0	0.0313133	0	0.0922805	0	0	0	0.158387	0	0	0	0.143666	0	0.0510275	0	0.298034	0	0	0	0.0528753	0.0805225	1.53437	0	0.547261	0	0.0556226	0	1.25878	0	3.69975	0
AC009039.1	0	0	0	0	0	0	0	0	0	0.0383156	0	0	0	0	0	0	0	0	0	0	0	0	0	0	0	0	0	0	0	0	0	0	0	0	0	0	0	0	0	0	0	0	0	0	0	0	0	0	0
LINC02002	0	0	0	0	0	0	0.00925418	0	0	0	0	0	0.0288596	0	0.043945	0	0	0	0	0	0	0	0	0	0	0	0.0404954	0	0	0	0	0	0	0	0.00958875	0	0	0	0	0	0.0386944	0	0	0	0	0	0	0	0
AC003973.2	0	0	0	0	0	0	0	0	0	0.0258919	0	0	0.011559	0	0	0	0	0	0	0	0.0109514	0	0	0	0	0	0	0	0	0	0	0	0.0131127	0	0	0	0	0	0	0	0	0	0	0	0	0	0	0	0
LINC02088	0	0	0	0	0.0226024	0	0	0	0	0	0	0	0	0	0	0	0	0	0.283832	0.0268183	0	0	0.0765292	0	0	0	0	0	0	0	0	0	0	0	0	0	0	0	0	0	0	0	0	0	0	0	0.0246225	0	0
LINC00559	0	0	0	0	0	0.00563057	0.0320678	0	0	0	0	0	0	0.00467809	0	0.004628	0	0	0	0	0	0	0.01227	0	0	0	0	0	0	0	0	0	0.00472696	0.0045472	0.0332271	0	0	0	0	0	0	0	0	0.00381893	0	0	0	0	0
FP236383.3	0	0.0848724	0	0	0	0	0	0.0188023	0	0	0.0305906	0	0	0	0	0	0	0	1.42992	0	0	0	0	0	9.02162	0	0	0	0	0	0	0.029356	0	0	0	0	0	0	0	0	0	0	0	0	0.01613	11.9087	0	0	0.0170792
LINC00838	0	0	0	0	0	0	0	0	0	0	0	0	0	0.00616151	0	0	0	0	0	0	0	0	0	0	0	0	0	0	0	0	0	0	0	0	0	0	0	0	0	0	0	0	0	0	0	0	0	0	0
GS1-24F4.2	0.113649	0	0	0	0	0.0151943	0	0.0121106	0.0962743	0	0.0197035	0	0.0337333	0.012624	0	0.0249777	0	0.025883	0.0368407	0	0	0	0	0	0.0900133	0	0.142002	0.0220672	0	0	0.0290262	0	0	0.0122708	0	0.0098137	0	0.019593	0	0	0	0	0	0	0	0	0	0.0190409	0
Z83851.2	0.864959	0.3269	0.275372	0.115645	0.191383	0.0330401	0.352825	0.105338	1.00022	0.383388	0.107114	0.268576	0.366766	0.27451	0.424446	0.0814711	0.199841	0.084424	0.801104	0.302775	0.347487	0.099142	0.18	0.353166	0.108741	0.0957173	0.257321	0.45586	0.533435	0.162065	0.420785	0.0822325	0.360591	0.160097	0.292464	0.2134	0.698407	0.340841	0.735333	0.17662	0.245877	0.264579	0.168197	0.201685	1.10699	0.169048	1.08877	0.331237	0.430582
LINC00905	0	0.01455	0	0	0	0	0	0	0	0	0	0	0	0	0	0	0	0	0	0	0	0	0	0	0	0	0	0	0	0	0	0	0	0	0	0	0	0	0.00529438	0	0	0	0	0	0	0.00689713	0	0	0
AL359853.2	0.288349	0	0.34272	0.129536	0	0.0616811	0.570849	0	0.217125	0.0511236	0.239959	0.107441	0.502113	0.153741	0.333633	0.0506983	0.0932685	0	0.448663	0	0.129742	0.0925419	0.268828	0.119874	0.162404	0.119127	0.288229	0	0.0553248	0.0864435	0.510604	0.307033	0	0.0498131	0.272994	0.159354	0.884739	0.31815	0.201876	0	0.459017	0	0.0523331	0.0418351	0.168702	0.105196	0.562203	0.23189	0.133972
AC073957.3	1.00914	0.341957	0.252863	0.0969824	0.114049	0.0483281	0.426626	0.16692	0.11795	0.189599	0.215169	0.254417	0.152597	0.291777	0.254872	0.235689	0.0341028	0.145441	0.330703	0.0516684	0.131022	0.195772	0.27382	0.353778	1.22368	0.0902265	0.0802957	0.109962	0.00866956	0.291238	0.350827	0.256602	0.00270482	0.0546411	0.192506	0.0624284	0.245663	0.203575	0.175045	0.332977	0.0911105	0.114667	0.114811	0.262228	0.0793084	0.0989071	0.237189	0.161501	0.0723123
CASC19	0	1.97444	0.741705	1.53666	0	0	1.94287	0.520162	0.542989	2.60619	0.884753	0.310028	0	0.197168	0.200566	3.12091	0.807395	0.101063	1.1508	0.226531	0.083195	0.311541	1.48679	0.230603	0.429573	1.37499	0	0.387739	0.266071	0.124719	0.0377789	0.51681	0.896526	0.239564	0.437634	2.18418	0.0447889	0.0765035	0	0.422862	0.971314	1.10854	0	0.281675	0.527366	0.303549	0.748739	0.446087	6.18536
LINC01663	0.0380513	0	0	0	0	0	0	0	0	0	0	0	0	0	0	0	0	0	0	0	0	0	0	0	0	0	0	0	0	0	0	0	0	0	0	0	0	0	0	0	0	0	0	0	0	0	0	0	0
AC018761.1	0.419741	0.2019	0	0	0	0	0.159802	0	0	0	0	0	0	0	0	0	0	0	0	0	0	0	0.244578	0	0.295508	0	0	0	0	0	0	0	0	0	0.165579	0	0	0	0	0	0	0	0	0	0	0	0	0	0.162516
PACERR	0	0	0.0366607	0	0	0.026392	0.0187888	0	0	0.0437494	0.0342244	0	0	0	0	0.0650782	0	0	0.0426608	0	0	0	0.0575129	0	0	0	0	0	0	0.0184937	0.0336118	0	0	0	0.0194681	0.0170461	0	0	0	0.0470274	0	0.0234825	0.0223922	0	0	0.0225055	0	0	0
AC026780.2	0	0.0536556	0	0	0	0.0298266	0.0212339	0	0	0.0247214	0.0773566	0.0173182	0	0	0	0	0	0	0	0	0	0.0223749	0	0	0	0	0	0.0216591	0	0	0	0	0	0	0	0	0	0	0	0	0	0.0265384	0	0.0202299	0	0.076303	0	0	0
AC084018.2	0.0546613	0.0450732	0.127616	0.0175397	0.0860054	0.0167038	0.0713499	0.0199706	0.0352796	0.0761461	0.0108305	0.0290961	0.216327	0.0416345	0.0847041	0.0755126	0.050516	0.0426816	0.0742514	0.0318899	0.0292794	0.0313265	0.136502	0.0243473	0.0934584	0.00806517	0.0520367	0.0242595	0.0449474	0.0468194	0.0638199	0.0103934	0.0210347	0.0134898	0.0369647	0.0431547	0.0567463	0.0215395	0.060137	0	0.062153	0.0222935	0.177154	0.0283234	0.0913721	0.021366	0.0527018	0.0209326	0.0241873
AC211433.2	0.157809	0	0	0	0	0	0	0	0	0	0.072959	0.130669	0.124909	0	0.0380402	0.0462442	0.0850744	0	0.181887	0	0	0.0422058	0.429117	0.0546714	0.111102	0	0.262906	0.0408557	0.100928	0.0394245	0	0	0.094466	0	0	0	0.127423	0	0	0	0	0	0	0	0.153881	0	0	0.0705056	0
AL596442.1	0	0	0	0	0	0	0	0	0	0	0	0	0	0	0	0	0	0	0	0	0.4982	0	0	0	0	0	0	0	0	0	0	0	0	0	0.0748772	0	0	0	0	0	0	0	0	0	0.0347038	0	0	0	0
AC026367.3	0.345041	0.0331937	0.102526	0.0775018	0.0950068	0.147616	1.0509	0.0294144	0.337758	0.0305875	0.0717843	0.0642827	0.191174	0.153307	0.474084	0.0606661	0.223212	0.0314324	0.954445	0.112728	0.129375	0.276841	0.361892	0.143443	0.607293	0.142548	0	0.214388	0.397213	0.103439	0.0939991	0.229624	0.557669	0.119214	0.408334	0.0715069	0.445763	0.0951755	0.362351	0	0.0549264	0.0656714	0.125245	0.0500603	0.302806	0.346166	0.439867	0.231235	0.133594
STXBP5-AS1	0.0948275	0.0260646	0.0503162	0.0202855	0.0349696	0.0144891	0.0283661	0.0144356	0.0382524	0.0090068	0.0845504	0.0273415	0.0375288	0.0270856	0.0636767	0.0416821	0.021909	0.0030852	0.137595	0.00829847	0.0584137	0.116844	0.23286	0.0316787	0.0476863	0.0139916	0.0169264	0.0447163	0.00649797	0.0177676	0.0322921	0.0225384	0.00608191	0.00877592	0.0721429	0.0444514	0.038284	0.0373672	0.0521634	0.0193633	0.00539121	0.0096688	0.0460995	0.00737039	0.153561	0.0154442	0.0203174	0.0453929	0.0498282
AC022509.1	0	0	0.0134065	0	0.0372699	0	0.0137418	0	0.190254	0.0319976	0.0375467	0	0	0.0160374	0	0.0475971	0	0	0.0156007	0	0	0.0144802	0.021032	0.0375139	0	0.01864	0.210465	0.014017	0	0	0	0	0	0.0155887	0	0	0	0	0.0126352	0	0	0	0.0163773	0	0	0	0	0	0
XACT	0	0	0	0	0	0	0	0	0	0	0	0	0	0	0	0	0	0	0	0.0334555	0	0	0	0	0	0	0	0	0	0	0	0	0	0	0	0	0	0	0	0	0	0	0	0	0	0	0	0	0
AC092813.1	0	0	0	0	0	0	0	0	0	0	0	0	0	0	0.0398958	0	0	0	0	0	0	0	0	0	0	0	0	0	0	0	0	0	0	0	0	0	0	0	0	0	0	0	0	0	0	0	0	0	0
LINC02546	0	0	0	0	0	0	0	0	0	0	0	0	0	0	0	0	0	0	0	0	0	0	0	0	0	0	0	0	0	0	0	0	0	0	0	0	0	0	0	0	0	0	0	0	0	0	0	0	0
AL353804.2	0.0586669	0.0564389	0.0435808	0	0	0	0.223354	0	0	0	0.0406846	0	0.0464359	0.104266	0.169701	0.0515749	0	0.0534442	0.15214	0	0.131985	0	0.0683691	0.0609736	0.0413029	0.0605934	0.195475	0.0455653	0	0	0.0399564	0	0	0	0.0462858	0	0.0473704	0	0	0.111809	0	0	0.053238	0.0425585	0.0429047	0	0.0439941	0	0.0454296
AC005920.1	0.00991111	0.0762777	0.0588998	0.333929	0.409352	0.063603	0.286772	0.0844912	0.350761	0.193294	0.0893517	0.147719	1.02767	0.132109	0.451538	0.052278	0.0801455	0.126403	0.0771072	0.0404756	0.0445948	0.0795212	0.0346505	0.123609	0.244218	0.133075	0	0.130861	0.237703	0.356548	0.00675018	0.250641	0.0622951	0.162656	1.50134	0.02054	0.248083	0.464757	0.0971444	0.0377776	0.17355	0.103751	0.629577	0.258832	0.0507379	0.0271184	0.393912	0.265683	0.0153496
LINC01815	0	0	0	0	0	0	0	0	0	0	0	0	0	0.0347888	0	0	0	0	0	0	0	0	0	0	0	0	0	0	0	0	0	0	0	0	0	0	0	0	0	0	0	0	0	0	0	0	0	0	0
AL158801.2	0.0272158	0.104729	0.0202173	0.0815081	0.0187346	0	0.0207229	0	0.0204933	0.0241265	0	0	0.107709	0.0483695	0.0196812	0.0478516	0.0440158	0	0	0.0444582	0.0408189	0.0436728	0.0317167	0.0282859	0.0191606	0	0.0453408	0.0422758	0	0	0	0.108672	0.0244374	0.0470161	0	0	0.0219753	0	0	0.0518684	0	0	0	0	0.0796147	0	0.020409	0.0729563	0
LINC01893	0	0	0	0	0	0	0	0	0	0	0	0	0	0	0	0	0	0	0	0	0.127485	0	0	0	0	0	0	0	0	0	0	0	0	0	0	0	0	0	0.0892639	0	0	0	0	0	0	0	0	0	0
AC013356.3	0.0348586	0	0	0	0	0	0	0	0	0.0309018	0	0	0.0551824	0.0309763	0	0	0	0	0	0	0	0	0.12187	0	0	0	0	0	0.0334412	0.0261255	0	0	0	0	0	0	0	0	0	0	0	0	0	0	0	0	0	0	0
LINC00709	0	0	0	0	0	0	0	0	0	0.0365316	0	0	0	0	0	0	0	0	0	0	0	0	0	0	0	0	0	0	0	0	0	0	0	0	0	0	0	0	0	0	0	0	0	0	0	0	0	0	0
AL590666.3	0	0	0	0	0	0	0.00752099	0	0.00371883	0	0.00342493	0	0.00390909	0	0	0	0	0	0.00426918	0	0	0.00396255	0	0	0.00695396	0	0	0	0	0.00370143	0.00336362	0	0	0	0.00389645	0	0.00398775	0	0	0	0.00786186	0	0	0	0	0	0.00370353	0	0
OSGEPL1-AS1	0.213043	0.0910898	0.211012	0.0708931	0.244422	0.0253179	0.126169	0.0403593	0.0356488	0.146891	0.0656631	0.0294006	0.281045	0.189316	0.205417	0.104049	0.0382835	0.0646923	0.225085	0.0580025	0.230769	0.0569778	0.165517	0	0.216648	0.0488974	0.157744	0.128695	0.0454178	0.0887051	0.0967316	0.189039	0.127529	0.0408931	0.112055	0.0490571	0.152907	0.0326474	0.0994359	0.315794	0.0753641	0.112634	0.150366	0.154547	0.103869	0.0647688	0.195262	0.0634551	0.128312
AC005828.5	0	0	0.0425987	0	0	0	0	0	0	0	0.0795356	0	0	0	0	0	0	0	0.0495706	0.0468377	0.0430036	0	0	0	0	0	0	0	0.0550131	0.0429783	0	0	0	0	0	0	0	0	0	0	0	0	0	0	0.0419379	0	0	0	0
LINC01285	0.185287	0.0155	0	0.0663483	0.249548	0.0516979	0.435518	0.0137353	0.072793	0.014283	0.0502802	0.0300173	0.0701408	0.0501113	0.116514	0.0424927	0	0.0587104	0.0278553	0.0263195	0.0664539	0.0387819	0.1596	0.0334908	0.0397012	0.0582435	0.174473	0.112624	0.115926	0.0664148	0.0109734	0.0214449	0.0506348	0.0417507	0.216098	0.00556511	0.0845618	0.0666643	0.0846012	0.0307064	0.0256483	0.0689978	0.131589	0.05844	0.0117831	0.0661273	0.144987	0.032393	0.0623826
PINK1-AS	0.568157	0.555396	0.99047	0.566044	0.293328	0.524366	0.753582	0.53122	0.300163	0.609272	0.498865	0.534942	0.456959	0.570026	0.629552	0.443082	0.429795	0.513404	0.970382	0.355526	0.498224	0.400713	0.549984	0.452396	0.37419	0.671996	1.2137	0.647677	0.360439	0.295324	0.789514	0.262235	0.448442	0.486796	0.661533	0.652033	0.495752	0.436034	0.29833	0.716048	0.60539	0.553765	1.09769	0.52849	1.07228	0.710421	0.470726	0.442172	0.255461
AC090502.1	0.00869232	0.0167244	0.322855	0	0.388931	0	0.668479	0.00741012	0	0	0	0	4.68537	0	5.91503	0	0.21087	0	0.405751	0	1.53836	0	0.465972	0	0	0	0.289624	0	0	0	0	0	0	0	0.795514	0	0.0280743	0	0.529447	0	1.06546	0.0330881	0	0	0	0	0.149922	0	1.31928
AC023824.1	0	0.00658296	0	0	0	0	0	0	0	0	0	0	0.227481	0	0	0	0	0	0	0	0	0	0	0	0	0	0	0	0	0	0	0	0	0	0	0	0	0	0	0	0.010893	0	0	0	0	0	0	0	0.00529885
AC016722.2	0.0554698	0.0106726	0.173064	0.0913691	0.137462	0.0237313	0.118262	0.03783	0.133659	0.0196693	0.0230805	0.0344476	0.0526864	0.0295752	0.184521	0.126787	0	0.0202127	0.191799	0.0724899	0.016639	0.0979129	0.0775719	0.0115301	0.164019	0.0114583	0.0369645	0.0344657	0.0106429	0.0332584	0.105781	0.029532	0.0199228	0	0.210064	0.0153276	0.0447889	0.0153007	0.0466021	0.0211431	0.0176603	0.021115	0.100673	0.0241435	0.02434	0.0505915	0.316134	0.0446087	0.00859078
AC105760.2	0.173921	0.00836579	0.045219	0.0130218	0.0778195	0.0372036	0.0993214	0.0222398	0.117865	0.0231268	0.0241223	0.0378026	0.130778	0.0772755	0.125772	0.0611585	0.014064	0.0158438	0.0526198	0.0568214	0.097819	0.0837265	0.131744	0.0361518	0.0183667	0.0269448	0.0289747	0.0540321	0.191876	0.0521394	0.0769941	0.0115744	0.085891	0.0375566	0.0823297	0.0180218	0.189583	0.107941	0.140029	0.0828654	0.221489	0.0413777	0.110479	0.0630833	0.248026	0.0793125	0.130423	0.0815889	0.0606052
AC138089.1	0	0	0	0	0	0	0	0	0	0	0	0	0	0	0	0	0	0	0	0	0	0	0.0490673	0	0	0	0	0	0.0403922	0	0	0	0.0378059	0	0	0	0	0	0	0	0	0	0	0	0.015396	0	0	0	0
AC092162.2	0.00384828	0	0.0057174	0	0	0.00411596	0	0	0.00289773	0.00341146	0.00533746	0.00477968	0.00913795	0	0	0	0	0.0035057	0	0.00314317	0	0.00617529	0	0	0.00270929	0	0	0	0	0	0	0	0	0	0	0	0	0	0	0	0	0	0.00698434	0	0	0	0.00288581	0	0
AL139220.2	0.01527	0	0.0321394	0.00571647	0.0595648	0.00544404	0.011627	0.00216958	0.0268291	0.00676833	0.0158843	0.00474144	0.0141009	0.00226156	0.00184043	0.0178987	0.012348	0.00927373	0.0241997	0.0166295	0.00190852	0.0102098	0.0533858	0.0105802	0.0107504	0.00525713	0.0381591	0.00790656	0.0244151	0	0.00346665	0.0101621	0.0479888	0.00439655	0.0020079	0	0.00616484	0	0.00534535	0.00485031	0.00405133	0.00484387	0.00923795	0.00369241	0.0614205	0.0092847	0.0286273	0.00341114	0.0256198
AC106772.2	0	0	0	0	0	0	0	0	0	0	0.0319402	0	0	0	0	0	0	0	0	0	0	0	0	0	0	0	0	0	0	0	0	0	0.0827112	0	0	0	0	0	0	0	0	0	0	0	0	0	0	0	0
AC025035.1	0.0227712	0	0	0	0	0	0	0	0	0	0.0315829	0.0424237	0.0180238	0	0.0164671	0	0.110483	0	0	0	0	0.0730812	0.0796109	0	0	0	0.0379361	0	0	0	0	0	0.0204465	0	0.0179655	0	0.036773	0	0	0	0	0	0	0	0	0	0.017076	0	0
LINC00315	0.0788708	0.00843061	0.0911388	0.00656135	0.0301625	0.00937298	0.0133455	0.0298829	0.0461916	0.00776867	0.0303865	0	0	0.0155748	0.0253492	0.0385202	0.0708648	0	0.0151507	0.0286309	0.065718	0.00703127	0.030638	0.018216	0.0802056	0	0.0145996	0	0	0.0131358	0.0417796	0.0116641	0	0.00756953	0.0207419	0.0242153	0.0495319	0.0120864	0.0368122	0.0167015	0.0418509	0.025019	0	0.0190716	0.0256357	0.00799271	0.019715	0.0234918	0.0271444
AC005775.1	0.167649	0.0460807	0.231286	0.0358636	0.0659459	0.0256158	0.273543	0.0408341	0.0360682	0.0212313	0.0332178	0.0446198	0.379135	0	0.0173195	0.0210547	0	0.0218178	0.124218	0.0782465	0.215524	0.0768642	0.111643	0.0497831	0.0505839	0.0247363	0	0	0.298689	0.0179497	0.0978696	0.0956316	0.0215049	0.0206871	0.0566864	0.0496342	0.077353	0	0.100606	0.136933	0.0762508	0.0227918	0	0.0347478	0.0875761	0.0436872	0.0718398	0	0.0556379
AC103794.1	0	0	0	0	0	0	0	0	0	0	0	0	0	0	0	0	0	0	0	0	0	0	0	0	0	0	0	0	0	0	0	0	0	0	0	0	0	0	0	0	0	0	0	0	0	0	0	0	0
BOLA3-AS1	1.5429	0.0854277	0.0742109	0.0332432	0.24451	0.166209	0.0169038	0.113552	0.317613	0.0688803	0.146256	0.0551462	0.0439293	0.138093	0.0160541	0.136614	0.0538557	0.101119	0.0863567	0.0271985	0.0915644	0.320617	0.219907	0.0692186	0.164108	0.160503	0.573262	0.189665	0.0851893	0.124787	0.249477	0.192063	0.0498342	0.182168	0.0700596	0.0920155	0.197178	0.122472	0.18651	0.105773	0.0706796	0.0950695	0.060437	0.0805223	0.121766	0.172105	0.0665909	0.163655	0.0859547
AC012494.1	0	0	0	0	0	0	0.0140533	0	0	0	0	0	0	0	0	0	0	0	0.0159543	0.0150747	0	0	0	0	0	0	0	0	0	0	0	0	0	0	0	0	0.0149026	0	0.0129216	0	0	0	0	0	0	0	0	0	0
AC138904.1	0.0164107	0	0.00609534	0.0061435	0.0451866	0	0	0.0139899	0.0803212	0	0	0	0.0649466	0.014583	0.0118674	0.0216403	0	0	0.141859	0.00670188	0.0184598	0	0	0	0.109758	0	0.0410096	0.0191187	0.00787168	0.0122993	0.0111768	0	0.0147353	0.00708747	0	0.00566829	0	0	0.0517018	0	0.0130619	0.00780857	0	0.0119047	0.00600078	0	0.0123063	0	0.00635392
LINC02533	0.0179203	0	0	0	0.00616791	0	0.156918	0	0	0.00794306	0	0	0	0.00796223	0	0.00787698	0	0.00816247	0	0	0	0.00718911	0	0	0	0	0	0	0	0	0	0	0	0	0	0.00618972	0	0	0	0	0	0	0	0	0	0	0	0.0120095	0
AC018541.1	0	0	0	0	0	0	0	0.0301032	0	0	0	0	0	0	0	0	0	0	0	0	0	0	0	0.0183502	0	0	0	0	0	0.0132327	0	0	0	0	0	0	0	0.0243511	0	0.0336493	0	0	0	0	0	0	0	0	0
RASA3-IT1	0	0	0.0397961	0	0	0	0	0	0.0403395	0	0	0	0	0	0	0	0.173283	0	0	0.0437562	0	0	0	0	0	0	0.0892498	0.0416083	0	0	0	0	0	0	0	0	0	0.147772	0	0.102099	0	0	0	0	0.0391788	0	0	0	0
AL365273.1	0	0	0	0	0	0	0	0	0	0	0	0	0	0	0	0	0	0	0	0	0	0	0	0	0	0	0	0	0	0	0	0	0	0	0	0	0	0	0	0	0	0	0.0314712	0	0	0	0	0	0
AC125603.2	0	0.0223565	0.0517895	0.0695983	0.0959829	0	0	0	0.524966	0.0412023	0.0644638	0.0288636	0.53343	0.0826036	0	0	0	0.0423405	1.08478	0.037962	3.24147	0	0.216658	0	1.30887	0	0.193578	0.0180493	0.178353	0.034834	15.8433	0	0.0208666	0.0602192	1.15508	0	0.112586	0	0.162699	0	0.0369938	0.0442307	0.14762	0.0337164	0.0339907	0	0.313684	0.0622961	0
AP000785.1	0.0332095	0	0	0.372969	0	0	0	0.113243	0	0.176639	0.115151	0.185612	0.0788577	0.0295109	0	0	0.0537093	0.0605062	0	0.0542492	0	0	0	0	0	0.0343	0	0.103172	0	0	0.0904722	0	0	0	0.0262009	0	0	0	0	0.0632913	0.0528656	0.126415	0.0602727	0.024091	0.048574	0.0908666	0.224133	0	0
LINC01856	0.00848933	0	0	0	0	0	0	0	0	0.0075257	0	0	0	0	0	0.00746309	0	0	0	0.00693385	0	0	0	0	0	0	0.042429	0	0	0	0	0	0	0	0	0	0.00685468	0	0	0	0	0	0	0	0	0	0	0	0
AL139039.3	0	0	0	0	0	0	0	0	0.0727478	0	0	0	0	0	0	0	0	0	0	0	0	0	0	0	0	0	0.0229932	0	0	0	0	0	0	0	0	0.00953426	0	0	0	0	0	0	0	0	0	0	0	0	0
AC012103.1	0	0	0	0	0	0	0.0198728	0	0	0	0	0	0.123948	0	0	0	0.08442	0	0.022561	0.0213171	0.0391443	0	0	0	0	0	0	0	0	0	0	0	0	0	0	0	0	0	0	0	0	0	0	0	0	0	0.0195717	0	0
CDKN2A-DT	0.0247356	0	0	0	0.187301	0	0	0	0.074503	0	0	0	0.195787	0	0.23254	0	0	0	0.213822	0	0.204045	0	0.0288263	0	0.139316	0	0.123627	0	0	0	0	0	0	0	0.0585461	0.0170875	0.0399454	0	0.0692708	0	0	0	0.0224466	0	0.0180898	0	0.0370983	0.0331539	0.0957721
AL353622.2	0.0478998	0.0460807	0.0711649	0	0	0	0.109417	0	0	0	0.0332178	0.0297465	0.341222	0	0.069278	0	0	0	0.372655	0	0	0	0	0	0	0.0989454	0	0	0	0.071799	0	0	0	0	0.037791	0	0.0386765	0	0.100606	0	0.0762508	0	0	0	0.0700609	0.0436872	0.14368	0	0
AC026367.1	0.266546	0.0320529	0.0495009	0	0.0458707	0.0712714	0.177586	0	0.0250884	0.0590724	0	0.0413822	0.210976	0.0296075	0.0481884	0.0292905	0.0538851	0	0.259211	0.0272134	0.1749	0.213861	0.116485	0	0.0469136	0	0.0555072	0.051755	0.767122	0.049942	0.158845	0.0443463	0.149584	0.0287791	0.105147	0.0230164	0.107611	0.0459522	0.116632	0	0.106077	0.0951214	0	0.0483398	0.121833	0.121552	0.0749556	0.133972	0
AL133467.1	0	0.33528	0.0913748	0.475833	0.705614	0.372757	0.1561	0.262152	0.0771853	0.181738	0.398079	0.662032	0.56794	0.0910885	1.2305	0.198249	0.0663118	0.0933794	0.478484	0.468848	0.476591	0.312527	0.836196	0.106535	0.0577326	0.614049	0.546464	0.764285	0.688356	0.460945	0.139626	0.545733	0.662689	0.566655	0.0808719	0.0424865	0.215194	0.452395	0.244	0.468853	0.32635	0.780385	2.97661	0.728723	0.134936	0.411355	0.0307472	0.27478	0.079376
DOCK9-DT	0.655877	0.145608	0.187392	0.0566618	0.451488	0.107923	0.172871	0.12903	0.455881	0.134176	0.262408	0.250652	1.85692	0.156916	0.218908	0.110883	0.448775	0.068941	0.28348	0.0412079	0.718858	0.586959	0.205785	0.0262179	0.319675	0.130272	0.336207	0.431035	0.387205	0.151249	0.24053	0.201454	0.158555	0.108947	0.0398046	0.0174263	0.224055	0.278332	0.300238	0.0961526	0.240941	0.144038	0.366267	0.256195	0.276728	0.299098	0.170252	0.101434	0.253944
AF001548.2	1.1932	0.210836	0.162802	0.218785	0.335251	0.286492	0.35229	0.20759	0.861798	0.34539	0.28708	0.25708	2.89113	0.779003	2.83513	0.256887	0.47259	0.199649	0.736741	0.218781	0.255655	0.781514	0.908098	0.329009	1.32006	0.503012	0.892498	0.321519	1.77542	0.456258	0.199017	0.129644	0.327975	0.168268	0.365026	0.504654	0.216283	0.0671693	0.903566	0.464086	0.581458	0.625685	0.243074	0.211978	1.10413	0.199885	0.566082	0.587491	0.565697
AL355314.1	0	0	0	0	0	0	0	0	0	0	0	0	0	0	0	0	0	0	0	0	0	0	0	0	0	0	0	0	0	0	0	0	0	0	0	0	0	0	0	0	0	0	0	0	0	0	0	0	0
ZNF630-AS1	0.0512781	0	0	0	0	0	0	0	0.0772242	0.0454575	0	0.0318445	0.0405875	0	0	0	0	0.0467132	0.132979	0	0	0.0411427	0	0	0	0	0	0	0	0	0	0.0682509	0	0.0442922	0	0	0	0	0.0359004	0	0	0	0	0.074397	0	0.0467684	0	0	0
AC027130.1	0	0	0.0304276	0	0.0281962	0	0.0155943	0	0.0308431	0.0181556	0	0	0.0486316	0	0	0.036009	0	0	0	0	0.0153584	0.131458	0	0	0.0288373	0	0	0	0.0196475	0	0	0	0	0	0	0	0.0330735	0	0.028677	0	0	0.05847	0	0	0.0299556	0.0186791	0	0.0549007	0
AC099794.1	0	0	0.0676623	0.0340985	0	0	0.104032	0	0.0685861	0	0.0315829	0	0	0	0.0329342	0.0400369	0	0	0.354314	0	0	0.0365406	0.053074	0	0.160315	0	0	0.0353717	0.0436905	0	0.155088	0.0606166	0	0.0786757	0	0.0629218	0.036773	0.0628116	0.0318847	0	0	0.0433402	0.123984	0	0.0999191	0	0.034152	0	0.0352664
AC027575.2	2.64021	0.467884	1.03225	0.442175	0.382621	1.18899	0.925813	0.592304	0.0784761	1.20106	0.50592	0.517772	0.522443	1.38918	0.47732	1.31322	0.561839	0.664587	0.54054	0.482364	1.22443	0.89194	0.971634	0.686005	0.953844	1.32757	1.27326	0.944352	2.86612	0.468654	0.189281	0.601097	0.436704	0.390089	1.28818	1.00793	0.75736	0.527038	0.170251	0.860697	0.442411	0.958735	0.819647	0.781232	0.8384	0.538635	1.1723	0.884689	0.269012
NDST1-AS1	0.442553	0.266091	0.164375	0.207093	1.59937	0.236668	4.00155	0.565907	0	0	0.153452	0.068708	15.1062	1.91717	0.320034	0.243159	0.178934	0.0503944	1.43459	1.08439	0.37336	0.133155	0.386805	0.0574941	0.233676	0.171407	0.4608	0.17186	3.39646	0.45606	0.263734	0.220888	0.29803	0	0.218222	0.0382148	0.0446672	0.228887	0.309836	0.105428	2.81796	0.63173	0.752999	0.240779	0.647302	0.655902	0.871155	0.0741458	0.0428372
AP001207.3	0	0	0.0615989	0.0310428	0	0.0443451	0	0	0	0.0735097	0	0	0	0	0	0.145796	0	0.0377701	0.0716806	0.0338643	0	0	0	0	0.0291896	0	0.0690731	0	0	0.0621478	0	0	0	0	0	0.0286416	0	0.114366	0	0	0	0	0	0	0	0.0378148	0	0	0
LINC01732	0	0.0587236	0	0.0228516	0.0630292	0	0	0	0.068946	0	0.0211658	0	0	0	0.0441426	0	0	0	0	0.0249286	0.022888	0	0	0	0.0429749	0	0	0.0237049	0.0585596	0.0228745	0	0	0.0822151	0	0	0.021084	0	0	0.405993	0	0	0	0	0	0	0	0.0228875	0	0
AC009930.1	0	0	0	0	0	0	0	0	0	0	0	0	0	0	0	0.0936989	0	0	0	0	0	0	0	0	0	0	0	0	0	0	0	0	0	0	0	0	0	0	0	0	0	0	0	0	0	0	0	0	0
AC084116.3	0	0.0456511	0	0	0	0	0	0	0	0	0	0	0	0	0	0	0	0	0	0	0	0	0	0	0	0	0	0	0	0	0	0	0	0	0	0	0	0	0	0	0	0	0	0	0	0	0	0	0
AC006213.3	0.0787521	0.0378807	0	0.0294817	0.0271054	0.210575	0.269839	0.134271	0.0889497	0	0.0273067	0.0489063	0.280502	0.209944	0.142375	0	0	0.0358707	0.340379	0.0643225	0.679158	0.0631862	0.137664	0.122773	0	0	0.327997	0	0.188875	0.0885336	0.268179	0.104819	0	0.0340116	0.310661	0.0272012	0.667675	0.108614	0.192974	0	0.250728	0.0374721	0	0.0571288	0	0.0359131	0.118112	0.105554	0
AC090948.2	0.505326	0.243068	0.134065	0.162149	0.546626	0.231632	0.0824508	0.0307704	0.326149	0.191985	0.150187	0.425892	0.342835	0.513197	0.391531	0.22212	0.350253	0.131526	0.343215	0.117925	0.351882	0.752969	0.126192	0.112542	0.152469	0.14912	0.601328	0.224272	0.34627	0.405779	0.417913	0.240209	0.259279	0.124709	0.398681	0.349082	0.378879	0.149345	0.530677	0.41274	0.172375	0.240446	0.393055	0.314208	0.686324	0.131681	0.351875	0.483789	0.111802
AC007611.1	0.635838	0.0101948	0.0787222	0.0158688	0.291796	0.0453377	0.282419	0.0542046	0.0877767	0.0375776	0.0514435	0.078973	0.109043	0.0376683	0.390838	0.0186325	0.0342778	0.0193078	0.0274819	0.0346223	0.143047	0.0680214	0.0987988	0.0660838	0.238744	0.0328359	0.300132	0.131691	0.142329	0.0555966	0.0721752	0.014105	0.114185	0.064075	0.192299	0.0512448	0.0598972	0.0730785	0.140967	0.0403931	0.151827	0.080679	0.25965	0.0538129	0.100751	0.0869878	0.182778	0.0710194	0.229773
AC097375.3	0	0	0	0	0	0	0.00517209	0	0	0	0	0	0.00537646	0	0	0	0.0109856	0	0	0	0	0	0	0	0	0	0	0	0	0	0	0	0	0	0	0	0	0.00936829	0	0	0	0	0	0	0	0	0	0	0
BX322557.1	0	0	0	0	0	0	0	0	0	0	0	0	0	0	0	0	0	0	0	0	0	0	0	0.0558254	0	0	0	0	0	0	0.0731655	0	0	0	0	0	0	0	0	0	0	0	0	0	0	0	0	0	0.0415939
AC027682.5	0.0768205	0	0.0570662	0	0.264406	0	0.0292467	0	0	0	0.0266369	0	0.0608047	0	0	0.033767	0	0	0.265624	0.0313724	0.0288043	0	0.0447624	0	0	0	0	0.0596647	0	0	0	0	0	0	0.0909122	0	0.0310142	0	0.0537829	0	0	0	0	0	0.0561809	0	0.0288037	0	0
AC024267.3	0.10867	0.209085	0.107634	0.216968	0.0748052	0.0387427	0.248233	0.0926396	0.163655	0.192669	0	0.157466	0.143356	0.0321889	0.20956	0.0318443	0	0.0329985	0	0	0.0271642	0.203444	0.126641	0.0752948	0.102008	0	0.120694	0.0844011	0.0347502	0.0542964	0	0.0482128	0	0.0625766	0.0285786	0.175162	0.116993	0	0.0507206	0.0690349	0.115326	0.0344716	0.0657423	0.105109	0	0.066075	0.0814909	0.048551	0.0841499
C15orf32	0	0	0	0	0	0	0	0	0	0	0	0	0	0	0	0	0	0	0	0	0	0	0	0	0	0	0	0	0	0	0	0	0	0	0	0	0	0	0	0	0	0	0	0	0	0	0	0	0
LINC01626	0	0	0	0	0	0	0	0	0	0	0	0	0	0	0	0	0	0	0	0	0	0	0	0	0	0	0	0	0	0	0	0	0	0	0	0	0	0	0	0	0	0	0	0	0	0	0	0	0
RRS1-AS1	0.0466272	0.0269138	0.0138548	0.0384018	0.157275	0.0299222	0.031953	0.0357743	0.0351099	0.0165338	0.0194012	0.060808	0.431803	0.120159	0.637283	0.0163962	0.00754095	0.0212381	0.00403059	0.0380838	0.0314697	0.0411521	0.0163015	0.0193842	0.00328267	0.028895	0	0.0651857	0	0.12231	0.00952693	0.111709	0.00418671	0.0443024	0.191292	0.0225472	0.0903574	0.0836001	0.421111	0.0622041	0.014845	0.0665588	0.0634686	0.0608842	0.0613795	0.0595371	0.0279724	0.0437471	0.0361065
AL031670.1	0.0912889	0.175644	0.0452094	0.0911332	0.0837877	0.0325462	0.11585	0.129705	0.13748	0.134878	0.08441	0.132281	0.240856	0.108163	0.132032	0.0535022	0.0984269	0.110883	0.263043	0.0745622	0.0456391	0.34181	0.212772	0.126504	0.257078	0.0314288	0.10139	0.11817	0	0.114031	0.103624	0.0810033	0	0	0.168054	0.126126	0.0737108	0	0.0426083	0	0.145321	0.115833	0.165682	0.0882977	0.0890161	0.0277535	0.296648	0.122357	0.0235637
AC104462.2	0	0	0	0	0	0	0	0	0	0	0	0	0	0	0	0	0	0	0	0	0	0	0	0	0	0	0	0	0	0	0	0	0	0	0	0	0	0	0	0	0	0	0	0	0	0	0	0	0
LINC02351	0	0	0	0	0	0	0	0	0	0	0	0	0.0557552	0	0.203759	0.185777	0	0	0	0.230137	0	0.113036	0	0	0	0	0	0	0	0	0	0	0	0	0	0.048661	0	0	0	0	0	0	0	0	0	0	0	0	0
AC243961.1	0	0	0	0	0	0	0	0	0	0	0	0	0	0	0	0	0	0	0	0	0	0	0	0	0	0	0	0	0	0	0	0	0	0	0	0	0	0	0	0	0	0	0	0	0	0	0	0	0
POC1B-AS1	0.113927	0.04384	0.0319715	0.0265375	0.0941088	0.0243702	0.104097	0.0323738	0.0667224	0.0471308	0.0316026	0.0440223	0.136264	0.0719918	0.0860482	0.0667697	0.0614173	0.0207569	0.161948	0.0392887	0.0892321	0.150316	0.162271	0.0447311	0.0481243	0.0235335	0.109661	0.0452253	0.0680052	0.0360513	0.037934	0.074133	0.0454649	0.0262415	0.0479378	0.0262337	0.145139	0.0558672	0.0496293	0.0241249	0.0362715	0.0530043	0.075815	0.0312216	0.0777632	0.0646534	0.0835347	0.0339332	0.054893
SMAD9-IT1	0.0403917	0	0	0.0302421	0	0	0	0	0	0	0.0560221	0	0	0	0.0584189	0.0355089	0	0	0.0349158	0	0	0	0.0941431	0	0.0568735	0	0.0672915	0	0.0387493	0	0	0.0537611	0	0	0.0318674	0.0279028	0	0	0.0848362	0	0.0642988	0.0768772	0.0366539	0.0293012	0.0590791	0.0368394	0	0	0
AC087477.3	0	0	0	0	0	0	0	0	0	0	0.0255753	0	0	0	0	0	0	0	0	0	0	0	0	0	0.025964	0	0	0	0	0	0	0	0	0	0	0	0	0	0	0	0	0	0	0	0	0	0	0	0
LINC02485	0	0	0	0	0.0142849	0	0.458228	0	0	0	0	0	0	0	0.0150067	0.0729724	0	0	0	0	0	0	0	0	0	0	0	0	0	0	0.0565336	0	0	0	0	0	0	0	0	0	0	0	0	0	0	0	0	0	0
AL161891.1	0.0526939	0.0295708	0.114169	0.065755	0.0453414	0.0281796	0.10365	0.0336908	0.0892759	0.0311417	0.0487233	0.0654475	0.33019	0.0585317	0.342953	0.069486	0.0497124	0.0360022	0.520032	0.068145	0.316127	0.0387554	0.112582	0.0182552	0.0741956	0.0589596	0.453564	0.0818523	0.11374	0.0526567	0.0418697	0.0116892	0.0197144	0.0189646	0.117791	0.0333679	0.22692	0.0363375	0.205978	0.0669501	0.0489314	0.0334306	0.0557874	0.0796365	0.112398	0.0440547	0.23709	0.0353136	0.163217
AC021483.2	0.55091	0.319675	0.467707	0.242249	0.589915	0.392819	0.106534	0.23855	0.223877	0.201552	0.339598	0.287818	0.747522	0.233121	0.70193	0.27675	0.197995	0.446103	0.219214	0.314263	0.308211	0.231534	0.13248	0.299918	0.2401	0.270952	0.203956	0.264877	0.0251671	0.183507	0.351386	0.337531	0.102074	0.226598	0.448443	0.175184	0.388343	0.313572	1.09587	0.249984	0.139204	0.324549	0.460253	0.456736	0.172669	0.478533	0.183611	0.351619	0.176059
AC122129.1	0.23554	0.086322	0.0333279	0.0755803	0.100372	0	0.0597825	0.0286851	0.135132	0.0198861	0.0622262	0.0208963	0.0443891	0.0398682	0.0648884	0.00986033	0.0544195	0.0204354	0.0484782	0.0183222	0.00841118	0.0809933	0.143782	0.116572	0.126344	0.0115845	0.0373718	0.0609796	0.0322804	0.0336249	0.0611123	0.0597149	0.0100712	0	0.123888	0.0232447	0.126791	0.0464079	0.0078526	0.0641282	0.0178549	0.0106739	0.0407131	0.0244096	0.0492163	0.0511489	0.075699	0.0150334	0.0260563
AC135048.3	0.248261	0.238833	0.0461053	0.464696	0.769034	0.26553	0.189034	0	0.0934695	0.220081	0.258248	0.11563	0.93339	0.165459	0.493711	0	0.501887	0.33924	0.429209	0.101386	0.325805	0.199191	0	0.258022	0.917605	0.57693	0	0.241024	1.429	0.0930322	0.126813	0.165217	0.390104	0	0.244835	0.0428751	0	0	2.21609	0.236571	0.494003	0.295321	0.337931	0.180095	0.0907802	0.113214	0.651596	0.166376	0.288367
AC084149.2	0	0	0	0	0	0	0	0	0	0	0	0	0	0	0	0	0	0	0	0	0	0	0	0	0	0	0	0	0	0	0	0	0	0	0	0	0	0	0	0	0	0	0	0	0	0	0	0	0
AC100768.2	0	0	0	0	0.0205176	0	0.0226951	0	0.0224436	0	0	0	0	0	0.0646628	0	0	0	0	0	0.0447036	0.0239146	0	0	0	0	0.248279	0	0	0	0	0	0	0	0.0470312	0	0	0	0.0417349	0	0.0474474	0	0	0	0	0	0	0	0
AL031587.2	0	0	0	0	0	0	0	0	0	0.0435909	0	0	0.0389209	0	0	0	0	0	0	0	0	0.0394533	0	0	0.0346186	0	0	0	0	0	0	0	0	0	0	0.0339687	0	0	0.0344263	0	0	0	0	0	0.0719224	0.044848	0	0	0
LINC02386	0	0	0	0	0.0263908	0	0	0	0	0	0	0	0	0	0	0	0	0	0	0	0	0	0	0	0	0	0	0	0	0	0	0	0	0	0	0	0	0	0	0	0	0	0	0	0	0	0	0	0
AL138781.2	0.430786	0.0743842	0.0246162	0.0661618	0.0304145	0.0236282	0.0925167	0.103581	0.0166348	0.0391679	0.0383005	0.0137192	0.410919	0.176681	0.191708	0.0873947	0.0178642	0.100625	0.028645	0.0541314	0.190518	0.159526	0.115853	0.0574005	0.583239	0.0570426	0.036804	0.0600532	0.0529833	0.206963	0.0300919	0.161721	0.0198363	0.0286229	0.122006	0.0228915	0.0178378	0.152343	0.278399	0.105257	0	0.0735819	0.0300709	0.0801291	0.0646248	0.0100744	0.149098	0.11844	0.128302
AC124312.2	1.19189	0	0.212495	0.107087	0.0328185	0.0509916	0.0363015	0.365786	0.0358993	0.0422638	0.0991867	0.118429	0	0.211829	0.0689535	0.167649	0.15421	0.0434312	0.123636	0	0	0.0765042	0.11112	0.14865	0.0335647	0.098482	0.158852	0.185142	0	0.214388	0.162352	0.190367	0	0.0411804	0.112842	0.065869	0.346458	0.197261	0.36716	0.0908609	0.0758936	0.0453702	0.129791	0.13834	0.0697328	0.130448	0.0357517	0	0
MTOR-AS1	0	0	0	0	0	0	0.0406311	0	0	0	0	0	0	0	0.0192943	0.0234554	0	0	0	0	0	0	0	0	0	0	0	0	0	0	0	0	0	0	0.02105	0	0	0	0	0	0.0424726	0	0	0	0	0	0	0	0
AC020663.1	0	0	0	0	0	0	0.0836372	0	0	0	0	0	0.0579614	0.0325363	0.0264776	0	0	0.0333546	0	0	0	0.0293771	0.0853384	0	0.0257772	0	0	0	0	0	0	0	0	0	0.028887	0	0	0	0	0	0	0	0	0	0	0	0	0.0490749	0
AL031773.1	0	0	0	0	0	0	0.0559594	0	0	0	0	0	0	0	0	0	0	0	0	0	0	0	0	0	0	0	0	0	0	0	0	0	0	0	0	0	0	0	0	0	0.409469	0	0	0	0	0	0	0	0
AL355483.3	0	0	0	0	0	0	0	0	0.0611529	0	0	0	0	0	0	0	0	0	0	0	0	0	0	0	0.0190587	0	0.0450996	0	0	0	0	0	0	0	0	0	0	0	0	0	0	0	0	0	0	0	0	0	0
AC079466.1	0.0685743	0.00879601	0.139237	0.0273829	0.0660866	0.00977922	0.205377	0	0.265065	0	0.0697477	0.0908494	2.72474	0	3.37211	0.0281328	0.177447	0.0166586	23.3238	0.00746794	0.0171416	0.0733602	22.6266	0	1.21982	0.0141652	0.190405	0.220142	0	0	0.0280224	0	0.0246295	0.0276416	0.0829568	0	0.284233	0.0315257	0.124825	0.00871268	0.0946071	0.121816	0.0207429	0.0165818	0	0	0.267403	0.0245099	6.05358
AP001059.3	0	0	0	0	0	0	0	0	0	0	0	0	0	0	0	0	0	0	0	0	0	0	0	0	0	0	0	0	0	0	0	0	0	0	0	0	0	0	0	0	0	0	0	0	0	0	0	0	0.0670812
AC073575.1	0	0	0	0	0	0	0.026008	0	0.0257198	0	0	0.0424237	0	0	0.0247006	0.0300277	0	0	0.0590523	0.0278983	0	0	0	0	0	0	0	0	0.0655357	0	0	0	0	0	0	0	0	0.0471087	0.0717407	0	0.0543735	0.0650103	0	0	0	0.0311528	0	0	0
AL356356.1	0.153063	0.206151	0.682219	0.320885	0.252875	0	0.722592	0.182679	0.230511	0.434205	0.233524	0.0570328	0.484609	0.462456	0.332065	0.565152	0.544604	0.474086	0.185238	0.150021	0.0459136	0.687732	0.535129	0.222714	0.129312	0.0632358	0.153	0.190209	0.0293679	0.0917731	0.0208494	0.244472	0.2199	0.0264421	0.386434	0.190327	0.247181	0.0844414	0.214323	0.233369	0.194927	0.0873972	0.277798	0.15545	0.246267	0.586328	0.298432	0.164124	0.379286
AC245140.2	0.377961	0.151503	0.187179	0.141494	0.252951	0.101063	1.71076	0.134253	0.229263	0.0744575	0.138336	0.1304	0.772838	0.149274	0.174624	0.332271	0.169798	0.172157	0.816803	0.128628	0.275565	0.210594	0.795288	0.130941	0.310443	0.140968	0.874547	0.464794	0.372665	0.188847	0.185914	0.13974	0.0565627	0.108823	0.563259	0.224834	0.22041	0.18824	0.279316	0.160073	0.183843	0.219808	0.438259	0.114243	0.238023	0.191512	0.598356	0.225153	0.14634
SACS-AS1	0	0	0	0	0	0	0.624471	0.00776835	0	0	0	0	0	0	7.50576	0	0.117901	0	0	0	0	0	0.276108	0	0	0	0	0	0	0	0	0	0	0	0	0	0	0	0.0127596	0	0	0	0	0	0	0	0	0	0
AC091564.6	0.0438738	0	0	0	0	0	0	0	0.0330366	0	0	0	0	0	0	0	0	0	0	0	0	0.105605	0.0511294	0	0	0	0	0	0.0841795	0.0328821	0	0	0	0	0	0.0303083	0	0	0.0307165	0	0	0	0	0	0	0	0.0329008	0.0588053	0.0679486
LINC01615	0.115887	0.0557428	0.057391	0	0.319093	0	0.102946	0	0.0145436	0.017122	0.0133943	0.0359837	0.0305754	0	0	0.0509388	0.124948	0	0.016696	0.0157755	0.0289683	0.0154968	0.292612	0.0200738	0.081587	0	0.321773	0	0	0.0144756	0.0657726	0	0.138741	0.0166831	0.53334	0.0266851	0.0155954	0	0.1217	0	0.0307463	0	0.0525814	0	0.0847511	0.0352316	0.0434515	0	0.149564
TRMT2B-AS1	0.0993045	0	0	0	0	0	0.0756135	0	0	0	0	0	0	0.17649	0.0718125	0	0	0	0	0	0	0.159353	0	0	0	0	0.165439	0	0	0	0	0.132174	0	0.0857757	0	0	0	0	0	0	0	0	0	0.144076	0	0	0	0	0
AL646090.1	0	0	0	0	0	0	0	0	0	0	0.0286943	0	0	0	0	0	0	0	0	0	0	0	0	0	0	0	0	0	0	0	0	0	0	0	0	0	0	0	0	0	0	0	0	0	0	0	0	0	0
AC005899.5	0.0368794	0	0	0	0	0	0.0842433	0	0	0	0	0	0	0	0.053339	0.0324212	0	0	0.0318797	0	0	0.0591799	0.128935	0	0.0778919	0	0	0	0	0	0.0251175	0	0.0331144	0	0.0290963	0.0254765	0	0.101727	0	0	0	0.0350961	0.0669333	0	0	0	0	0.0494306	0
LINC00972	0	0	0	0	0	0	0.476653	0	0	0	0	0	0	0	0	0	0	0	0.216452	0	0	0	0.175085	0	0	0	0	0	0	0	0	0	0	0	0	0	0	0	0	0	0	0	0	0	0	0	0	0	0.01939
AL133351.1	0.0755377	0.0363345	0.224453	0.367618	0.129995	0	0	0	0.0853191	0.368298	0.130961	0.258005	1.01642	0.067125	0.355066	0.0332031	0.305415	0.172033	0.68562	0.246788	0	0.0303036	0.0880299	0	0.0531804	0	0.31461	0.264008	0.0362331	0	0.0771699	0.603242	0.813915	0.0978702	0.14899	0.104364	0	0	0.0264424	0	0	0	0.616929	0.273985	0	0	1.04794	0	0
AC113378.1	0	0	0	0	0	0	0	0	0	0	0	0	0	0	0.0330822	0	0	0	0	0	0	0	0.0533125	0	0	0	0	0	0	0	0	0	0	0	0	0	0	0	0	0	0	0	0.0415137	0	0.0334561	0	0.0343055	0	0
AP000766.1	0.240945	0.18922	0.178986	0.106768	0.392649	0.178816	0.321996	0.138333	0.248078	0.283341	0.323954	0.357281	0.369749	0.318982	0.366261	0.185881	0.167005	0.201578	0.531328	0.249009	0.236001	0.284063	0.361018	0.189092	0.190403	0.223464	0.237568	0.320806	0.0849115	0.128987	0.117215	0.143986	0.141288	0.182636	0.287083	0.186828	0.623355	0.135637	0.475083	0.374856	0.180037	0.173141	0.267733	0.274667	0.219363	0.295997	0.228621	0.224085	0.182772
AL592164.1	0	0	0.0076531	0	0	0.0110189	0	0	0.0155152	0	0	0	0	0	0	0	0	0	0.026717	0	0	0.0413301	0	0	0.0145062	0	0	0	0	0.0077213	0	0	0	0	0	0	0	0	0	0	0	0	0	0.0149472	0.0226032	0	0	0	0.0159555
AC119428.2	0.0478998	0	0	0	0.0329729	0.0512316	0.0182362	0	0.0901706	0.0212313	0.0166089	0.0297465	0.0379135	0.0425651	0	0.0210547	0.116202	0	0	0.0195616	0	0.153728	0.083732	0.0248916	0	0	0.1197	0.0930067	0	0	0	0	0	0.0206871	0	0.0165447	0	0	0	0.0456442	0	0.0455837	0.0217336	0.104243	0.0875761	0.109218	0.0359199	0.160504	0.0556379
AC138956.1	0.24235	0.272004	0.06001	0.120968	0.194632	0	0.246044	0	0.334562	0	0.0280111	0.175587	0.319707	0.10768	0.321304	0.106527	0	0.0367959	0.279327	0.230936	0	0.226856	0.329501	0.0419798	0.426551	0.125154	0.201875	0.250971	0	0.12109	0.082529	0	0	0.104667	0.0637347	0.0837085	0.521826	0.167124	0.311066	0.230938	0.128598	0.192193	0.439847	0.117205	0.236317	0.0368394	0.242317	0.216553	0.0312779
AC104785.1	0.0692429	0.233146	0.308623	0.259218	0.714974	0.185148	0.896302	0.472231	0.0260697	0.0920746	0.528208	0.881519	0.438456	0.553781	0	0.152181	0.335957	0	2.03509	0.763502	4.05024	0.972241	0.363123	0.0719654	0.292492	0.178792	0.173035	0.295787	0.730701	0.596799	0.966768	0.230405	1.6787	0.239238	0.0273149	0.215251	2.73959	0.907243	0.193911	0.527858	0.385793	0.626	0.125671	0.728344	0.379795	0.66311	0.389438	0.510446	0.187668
AL359881.3	0.0236577	0.0113796	0.0175741	0	0	0	0	0	0	0	0	0	0.00936273	0.0105114	0.00855408	0	0	0	0	0	0.00887059	0.00949079	0	0	0.0249834	0	0	0.00918719	0.0680871	0	0	0	0.042485	0	0	0.00817143	0	0.0163142	0	0	0	0	0	0	0	0	0	0	0
AL158829.1	0	0	0	0	0	0	0.0648567	0	0	0	0.0295347	0	0	0	0.0307983	0	0	0	0	0	0.0319378	0	0	0	0	0	0	0.0330777	0	0.031919	0	0	0.0382409	0	0	0	0	0	0	0	0	0	0	0	0	0	0	0	0
Z84468.1	0	0	0.00416713	0.00420006	0	0	0	0	0	0	0	0	0	0	0	0	0	0	0	0.00458181	0	0	0	0	0.0513413	0	0	0	0	0	0.0420263	0	0.00503697	0	0.00442578	0	0	0	0	0	0	0	0	0	0.0205125	0	0	0	0
AC012306.2	2.00343	0.9015	1.96833	0.701617	1.44584	0.933147	1.15641	1.01923	0.754284	1.2604	1.05322	0.662214	3.01804	0.832723	1.49552	0.99425	0.83616	0.559298	0.865913	0.659816	1.52663	0.829645	1.28035	0.940348	1.66071	1.4351	1.1305	0.8533	3.65793	0.944499	0.946332	0.860178	0.870437	1.20018	1.6571	0.625024	1.59157	1.87178	2.39804	0.985336	1.23454	0.799523	1.49548	1.19549	1.18158	1.00203	0.945036	1.34263	0.675604
AC023762.1	0	0	0	0	0	0	0	0	0	0	0	0	0	0	0	0	0	0	0	0	0	0	0	0	0	0	0	0	0	0	0	0	0	0	0	0	0	0	0	0	0	0	0	0	0	0	0	0	0
AC009119.3	0	0.0695712	0.376049	0.270729	0.0746723	0	1.07376	0.030825	0.0816821	0.192326	0.0250756	0	1.00171	0.257054	0.183039	0.222514	0.292396	0.263519	0.0937704	0.206735	0.027116	0.0290118	0	0.300644	0.0763701	0	0	0.0561675	0	0.0271	0.0246268	0.0481272	0	0	0.199695	0	0.467141	0.947529	0.506305	0.344561	0.172682	0.172052	0.196877	0	0	0.131915	0.867692	0.533113	0.0280001
LINC01524	0	0	0.0247758	0.00312145	0.0286985	0	0.00317443	0	0	0.00369581	0	0	0.0329987	0	0	0.00733012	0	0	0.00360385	0	0.0656547	0	0.0631605	0	0	0	0	0	0.00399952	0	0.0255547	0	0	0	0	0	0.0504941	0	0.119671	0	0	0	0	0	0	0	0	0	0.00322836
AC026167.1	0	0	0	0	0	0	0.051842	0	0	0	0	0	0	0	0	0	0	0	0	0.0556099	0	0	0	0	0	0	0	0	0.130633	0	0	0	0	0	0	0	0	0	0	0	0	0	0	0	0	0	0	0	0
NKAIN3-IT1	0	0.0139093	0.00214809	0	0	0.00309282	0.00220181	0.00739538	0.0740321	0.00256344	0	0.00359155	0.00228882	0.0256963	0	0	0	0	0.0174976	0	0	0.00696036	0.00336989	0	0.00203581	0.0119465	0.0337222	0	0	0	0	0	0	0	0	0.00199759	0	0	0	0.011022	0	0	0	0.0041954	0	0.0131868	0	0	0
AC016573.1	0	0	0	0.0282783	0	0	0.0287584	0	0	0	0	0	0	0	0	0	0	0	0	0	0	0	0	0.0392539	0	0	0	0.0293342	0	0	0	0	0	0	0	0	0	0	0	0	0	0	0.0342738	0	0	0	0.283227	0	0
AP001208.2	0	0.0338829	0	0	0	0	0	0	0	0	0	0	0	0	0	0	0	0	0	0	0	0	0	0	0	0	0	0	0	0	0	0	0	0	0	0	0	0	0	0	0	0	0	0	0	0	0	0	0
AL513324.1	0	0	0	0	0	0	0.0735796	0	0	0.0571096	0	0	0	0	0	0	0	0	0	0	0	0	0	0	0	0	0	0	0	0	0	0	0	0	0	0	0	0	0	0	0	0	0	0	0	0	0	0	0
LINC00354	0	0	0	0	0	0	0	0	0	0	0	0	0	0	0	0	0	0	0	0	0	0	0	0	0	0	0	0	0	0	0	0	0	0	0	0	0	0	0	0	0	0	0	0	0	0	0	0	0
BICRA-AS1	0.0372165	0.0358031	0	0	0	0	0	0	0	0	0	0	0.0883725	0	0	0	0	0	0	0	0.0279091	0	0.0433712	0	0.0262013	0	0	0	0	0	0	0	0	0	0	0	0	0	0	0	0	0	0.0337726	0	0	0.0339435	0	0	0
AC015912.3	0.233993	0.112553	1.47749	0.262793	0.161075	0.0625673	1.11356	0.299215	1.18932	1.14088	0.121703	0.145313	0.787142	0.3119	0.211517	1.28567	1.22991	0.586197	0.202271	0.143339	0.30708	0.281615	0.613553	0.243193	1.52382	0.543773	0.974567	0.227172	4.09673	0.350742	1.11556	0.700749	0.262632	0.252644	0.138458	0.242466	0.0944685	0.161361	0.163822	0.111487	0.465612	0.111339	0.10617	0.127309	0.213907	0.746951	0.263206	0.392036	0.362393
AC019080.5	1.53286	0.54329	0.399538	0.0201348	2.90637	0.143814	0.675727	0.252179	0.526491	0.143038	0.0745975	0.100203	0.191571	0.262869	0.583417	0.260055	0.0869849	0.146989	0.627655	0.329472	0.342836	0.302075	0.438754	0.447193	0.567983	0.305528	0.448017	0.292412	0.593371	0.241859	0.183155	0.143174	0.796846	0.209057	0.381903	0.222928	1.71541	0.296716	0.489517	0.256259	0.299665	0.358286	0.317248	0.312133	0.236004	0.269799	0.806656	0.360445	0.478962
AL021920.1	0	0	0	0	0	0	0	0	0	0	0	0.0622772	0	0	0	0	0	0.0456777	0.0433438	0	0	0	0	0	0	0.0517879	0	0	0	0	0	0	0	0	0	0	0	0	0.0351046	0	0	0	0	0.0363739	0	0	0	0	0
XXYLT1-AS1	0	0	0	0	0	0	0	0	0	0	0	0	0	0	0	0	0	0	0	0	0	0	0	0	0	0	0	0	0	0	0	0	0	0	0	0	0	0	0	0	0	0	0	0	0	0	0	0	0
DGUOK-AS1	0.188277	0.0679224	0.227275	0.140967	0.162006	0.0251716	0.268799	0.160504	0.177214	0.312947	0.228493	0.0584613	0.391189	0.0209135	0.136153	0.268965	0.0761244	0.0643184	0.712041	0.096112	0.123542	0.302125	0.548533	0.1223	0.198827	0.0486148	0.431288	0.0731151	0.519285	0.176385	0.0320575	0.0939732	0.10566	0.0813134	0.204246	0.0650314	0.152023	0.129835	0.148292	0.0897054	0.224786	0.179173	0.106784	0.102436	0.791729	0.0858593	0.176485	0	0.164019
AP005205.2	0	0	0	0	0.0856222	0	0.189419	0	0.03122	0	0.0575054	0.025748	0	0	0.0299828	0	0	0	0	0	0	0	0.241589	0	0	0	0	0	0.238651	0	0.028238	0	0.0372284	0	0	0.0286416	0	0	0	0.0790175	0	0	0	0	0	0.0378148	0	0	0.0642122
AC104827.1	0.0370135	0	0	0	0.0254791	0	0	0	0.0139355	0	0	0	0	0	0	0	0	0	0	0	0	0	0	0	0	0.0191145	0	0	0	0	0	0	0	0	0	0	0	0	0	0.0352705	0	0	0	0	0.0135345	0	0	0	0
LINC00269	0.00936835	0.00901257	0	0	0	0	0	0	0.0070543	0	0.00649681	0	0	0	0	0	0	0	0	0	0	0	0	0	0	0	0	0	0	0	0	0	0	0	0	0	0	0	0	0	0	0	0	0	0	0	0	0	0
STEAP3-AS1	0.0632611	0.0608586	0.0281961	0.118412	0.0566114	0.0676614	0.149324	0.0269647	0.0381081	0.0504722	0.0394836	0.070715	0.0350506	0.112431	0.0640466	0.0778592	0.0306934	0.132548	0.0710903	0.0516699	0.0189761	0.0609086	0.0589784	0.170946	0.0935284	0.0718722	0.0632348	0.0982669	0	0.0995659	0.0172341	0.0926202	0	0.0928926	0.0998207	0.122363	0.0561879	0.0959741	0.0708638	0.0723386	0.0201408	0.0180606	0.177962	0.0826042	0.0138794	0.173093	0.0237196	0.254372	0.0293923
AC104232.2	0	0	0	0	0	0	0	0	0	0	0	0.0164399	0	0	0	0	0	0	0	0	0	0.0212401	0	0	0	0	0	0	0	0	0	0	0	0	0	0	0	0	0	0	0	0	0	0	0	0	0	0	0
AC074117.1	0.924795	0.476406	0.873136	0.388645	1.70446	0.325453	1.47648	0.437423	0.777232	0.502471	0.413762	0.411281	1.62927	0.530193	1.52738	0.870697	0.434223	0.510915	1.32549	0.404476	0.612978	0.473925	0.855234	0.409266	0.567068	0.529961	0.198798	0.52364	1.29358	0.447165	1.34097	0.603537	0.375012	0.386519	2.57487	0.436894	1.7006	0.452586	1.35758	0.443466	0.769324	0.669994	0.996231	0.545352	1.00795	0.516961	1.01564	0.583779	0.785432
AL031663.3	0.0113475	0	0.016859	0	0.00781132	0	0	0	0.00854459	0.0100594	0.0314773	0	0.0808357	0.0201674	0.016412	0.0199515	0	0	0.0196183	0	0.00850963	0	0.0264482	0.0117937	0	0	0.0378093	0.00881335	0	0.0170092	0.00772846	0.0151035	0	0	0	0	0	0	0.00794452	0.0216263	0	0	0	0.0164635	0.13278	0	0.00850945	0.0304188	0
AC079031.1	0	0	0	0	0	0	0	0	0.0296213	0	0	0	0	0	0	0	0	0	0	0	0	0	0	0	0	0	0	0	0.0188692	0	0	0	0.017661	0	0	0	0	0	0	0	0	0	0	0	0	0	0	0	0
AC018767.3	0	0	0	0	0	0	0	0	0	0	0	0	0	0	0	0	0	0	0	0	0.0317386	0	0	0	0.0297965	0	0	0	0	0	0	0	0	0	0	0	0	0	0	0	0	0	0	0	0	0	0	0	0
AL356276.1	0	0	0	0	0.0184875	0	0	0	0	0	0	0	0	0	0	0	0	0	0	0	0	0	0.0312982	0	0	0	0	0	0	0	0	0	0	0	0	0	0	0	0	0	0	0.0255581	0	0	0.0392822	0	0	0	0
AC009097.4	0.262	0	0.0389254	0	0	0	0	0.0223353	0	0.0696781	0.054508	0	0.0414756	0	0	0	0	0	0	0	0	0	0	0	0.0184455	0	0	0.0406979	0	0	0.0178441	0	0	0	0	0	0	0	0	0	0	0.0498663	0.0951021	0	0.0383216	0.0238958	0	0	0
GRIK1-AS1	0	0.014725	0.0682219	0	0	0.016371	0.0116547	0	0.0230511	0	0.0106147	0.0190109	0.0121152	0.0272033	0	0.06728	0	0.0139437	0	0	0.0114784	0.0614047	0.0891882	0	0.0754322	0	0.0254999	0.0118881	0.0293679	0.0114716	0	0	0	0	0	0.0105737	0.0370771	0.0422207	0.0214323	0	0	0.0436986	0.0138899	0.0111036	0.0447758	0.0139602	0.0114782	0	0.0118527
AC243967.3	0	0.00864649	0.00667661	0	0	0	0	0.00766203	0	0	0	0	0	0	0	0	0	0	0	0	0	0	0	0	0	0	0	0	0	0	0	0	0	0	0	0	0	0	0	0	0	0	0	0	0	0	0	0	0.00695986
AC009054.2	1.25193	0.261822	0.121304	0	0.187346	0.174653	0.70458	0.139207	0	0.96506	0.377475	0.507043	0.775504	0.193478	0.432987	0.574219	0	0.148758	0.282314	0.0889164	0.244914	0	0.5709	0.113143	0	0.112438	0.272045	0.0845516	0.156655	0.122385	0.370718	0	0.488748	0.141048	0.0429443	0.338415	0.0439506	0.0750716	0.304866	0.103737	0.259946	0	0	0.0789722	0.318459	0.0992891	0.20409	0.437738	0.12645
AC079779.2	0.198717	0.0212411	0.0164019	0	0	0.0236154	0	0.056468	0.0332516	0.0391467	0.0612476	0	0.0349528	0.0392412	0.015967	0.0970526	0.0714182	0.0603421	0.0381726	0	0.0331156	0.0708618	0	0.0458955	0	0.0456093	0.147136	0	0	0.016548	0	0	0	0.0572148	0.121939	0.0152527	0.0534843	0.0609041	0	0.0420798	0	0.021012	0	0.0160171	0.0161474	0.0201378	0.0165574	0	0
AL163973.3	0	0	0	0	0	0	0.0360483	0	0	0	0	0	0	0	0	0	0	0.0431282	0	0	0	0	0.0551722	0	0	0	0	0	0.0908355	0.0354821	0	0	0	0	0	0	0	0	0	0	0	0.0450536	0	0.0343437	0	0	0.213013	0	0
AL365184.1	0	0	0	0	0	0	0	0	0	0	0	0	0	0	0	0	0	0	0	0	0	0	0	0	0	0	0	0	0	0	0	0	0	0	0	0	0	0	0	0	0	0	0	0	0	0	0	0	0
AC004596.1	1.07956	0.0370915	0.171847	0.0577349	0	0	0.11743	0.0328684	0.203225	0	0.106951	0	0.0305175	0	0.250936	0	0	0	0.0666575	0.0314912	0.0289134	0	0.179728	0.200358	0.162865	0	0.192698	0.0598907	0.036988	0.0866891	0.183814	0	0	0	0.27377	0.0266345	0.0622633	0	0.269933	0.0734803	0.122752	0.0366914	0.0699757	0.0279693	0.197378	0.0351649	0.0867384	0	0
AC008395.1	0.0670755	0	0	0	0	0	0	0	0	0.0297309	0.0232579	0	0	0	0	0	0	0	0	0	0	0	0.0390841	0	0	0	0	0	0	0	0	0	0	0	0	0	0.0270799	0	0	0	0	0	0	0	0	0	0	0	0
ERICH6-AS1	0.221544	0.165768	0.0914301	0.221166	0.27112	0.28961	0.28115	0.377728	0.315106	0.305505	0.341417	0.366886	0.155872	0.349991	0.231415	0.346244	0.597167	0.201821	0.0851152	0.402113	0.239978	0.493762	0.430303	0.153503	0.225293	0.0508486	0.533124	0.133831	0.779296	0.258285	0.184418	0.425929	0.176824	0.361461	1.2041	0.119034	0.397521	0.0679003	1.32701	0.375309	0.0391857	0.16398	0.0223381	0.214285	0.504066	0.224511	0.110757	0.263948	0.209679
AC040162.3	0.151104	0.0852145	0.092895	0.132641	0.125537	0.0501563	0.29359	0.0932799	0.0784694	0.106238	0.0433609	0.0744234	0.511401	0.0879738	0.067824	0.251934	0.151684	0.189866	0.148636	0.119162	0.183649	0.171405	0.285393	0.0703997	0.0953763	0.0914871	0.138889	0.0687969	0.114968	0.0781023	0.0816206	0.0554812	0.0982499	0.0540077	0.139769	0.0719889	0.0504863	0.0503039	0.21158	0.0993028	0.116123	0.0942125	0.0520116	0.0604773	0.125749	0.0665316	0.113313	0.104757	0.169463
AL451070.1	0	0	0.0344477	0.0694397	0	0	0.0353092	0	0	0	0	0	0	0	0	0	0	0	0.0400856	0	0	0.0372065	0	0	0	0	0	0	0	0	0	0	0	0	0	0	0	0	0	0	0	0.04413	0	0	0	0	0	0	0.0359091
AL133387.1	0	0	0	0	0	0	0	0	0	0	0	0	0.0421813	0	0.0385381	0	0	0	0.046067	0	0	0	0	0	0	0	0	0	0	0	0	0	0	0	0	0	0	0	0	0	0	0	0	0	0	0	0	0	0
AC096666.1	0	0	0	0	0	0	0	0	0	0	0	0	0	0	0	0	0	0	0	0	0	0	0	0	0	0	0	0	0	0	0	0	0	0	0	0	0	0	0	0	0	0	0	0	0	0	0	0	0
AC142472.1	0.51449	0.0899911	0.373503	0.122566	0.507094	0.10005	0.284908	0.15949	0.360993	0.248776	0.113524	0.130707	1.17541	0.394846	0.558083	0.256986	0.113465	0.085216	1.14217	0.21011	0.73657	0.309598	0.436054	0.18229	0.551552	0.265692	0.428563	0.181633	0.953486	0.29796	0.294658	0.264575	0.461966	0.111099	0.276757	0.0646205	0.273801	0.161268	0.794078	0.133708	0.167524	0.178041	0.222829	0.237506	0.24799	0.223957	0.385814	0.219414	0.190147
AC090921.1	0.0511065	0	0.0253097	0	0.0234536	0	0.129713	0	0.0256552	0	0.0236277	0.0105793	0.0269678	0	0	0.0149761	0	0	0.058904	0	0.0127751	0.0273366	0.0595583	0	0	0	0	0.0132311	0.0163428	0	0.0116024	0.0226742	0	0	0	0	0	0.0234952	0.0238535	0.0324666	0.0271185	0	0	0	0.0498341	0	0	0.0456664	0.0791502
LINC02056	0.0497736	0	0	0	0	0	0	0	0	0	0	0	0	0	0	0	0	0	0	0	0	0	0.0290025	0	0	0	0.0414608	0	0	0	0	0	0	0	0	0	0.0200948	0	0.0174236	0	0	0	0	0	0	0	0	0	0
MINCR	1.49239	0.487865	1.62527	0.20612	2.14441	0.511404	1.47836	0.407614	1.09103	0.809208	0.512453	0.611868	2.62629	0.888415	0.880151	0.573197	0.468666	0.329985	1.86622	1.01776	1.34734	1.10441	2.39773	0.481886	3.8049	0.748253	0.57933	0.348858	6.35235	1.34655	1.06577	1.09925	5.38617	0.40049	1.71471	0.240223	1.7081	0.639471	1.66363	0.856032	0.945673	0.799742	1.91968	0.515033	1.38813	0.44931	3.66166	0.796237	4.0392
AP003392.5	0.0981081	0	0	0.257094	0.0675349	0	0.448215	0.0418181	0.295499	0.217429	0.102055	0.152316	0.310617	0	0.212842	0.0431241	0.0793344	0	0.424038	0.120198	0.0735725	0.0787164	0.342998	0.254914	0.103606	0.10133	0.326891	0.228595	0.235297	0.0367645	0.0334093	0	0.176185	0.0423711	0.193508	0.135547	0.118825	0.0676549	0.137373	0	0.156176	0.0466821	0.222573	0.106755	0.143498	0.0447399	0.183927	0.131497	0.2659
AC068733.1	0	0	0	0	0	0	0	0.00702896	0	0	0	0	0	0.00732693	0	0	0	0	0.00712741	0	0	0	0.00960877	0	0	0	0	0	0	0.00617954	0	0	0	0	0	0	0.00665756	0	0	0	0	0	0	0	0	0	0.00618305	0	0
AP003306.1	0	0	0	0	0	0	0	0	0	0	0	0	0	0	0	0	0	0	0	0	0	0	0	0	0	0	0	0	0	0	0	0	0	0	0	0	0	0	0	0	0	0	0	0	0	0	0.0864927	0	0
LNCOC1	0.404713	0.0206731	0.00798163	0.0080447	0.125737	0.00383065	0.139081	0.00915966	0.0458468	0.0253999	0.0149024	0.00667255	0.130403	0.0190959	0.03885	0.00314857	0.063716	0.0228388	0.0185759	0.00292529	0.0080575	0.0287362	0.00417383	0.0186117	0.078166	0	0.0537006	0.00834508	0.0858974	0.0134213	0.0341499	0.009534	0.0385908	0	0.381467	0.00742243	0.0231351	0.0148188	0.0300897	0.0136515	0.0285068	0.010225	0.136504	0.0259813	0.0340505	0.0163327	0.177261	0.0240022	0.0221873
PEX5L-AS1	0	0	0.036572	0	0	0	0	0	0	0	0	0	0	0	0	0	0	0	0	0	0	0	0.0286869	0	0.0346605	0	0	0	0	0	0	0	0	0	0	0	0	0	0	0	0	0	0	0	0.0180024	0	0	0	0
DNM3OS	0.126124	0.242669	0.305365	0.160884	0.33442	0.169871	0.00355685	0.1792	0.0457267	0.260885	0.278594	0.153749	0.0332766	0.464915	0.0135122	0.320314	0.430623	0.217027	0.0484559	0.236553	0.0840732	0.625911	0.304853	0.36412	0.0460417	0.120617	0.241249	0.359179	0.0582573	0.241568	0.0763554	0.304655	0.243275	0.282442	0.0368544	0.242021	0.056577	0.128852	0.0359746	0.258176	0.0371806	0.266724	0.0763021	0.250761	0.0683247	0.362139	0.0175149	0.319314	0.104901
AP001107.7	0.0748435	0	0	0	0	0	0	0.0638033	0	0	0	0	0	0	0.0541234	0	0	0	0	0.06113	0.056126	0	0	0	0	0.0773011	0	0.0581292	0	0	0	0	0	0	0	0.0517023	0	0	0	0	0	0	0.0679176	0	0.10947	0	0	0	0
AL360013.2	0	0.024268	0	0	0	0	0	0	0	0	0	0	0.0199669	0	0.0182423	0	0	0	0	0	0	0	0	0	0	0	0	0	0	0	0	0	0	0	0	0	0	0	0	0	0	0	0	0	0	0	0	0	0
AC026765.2	0.0153063	0.309226	0.0113703	0.137522	0.0421459	0.278307	2.69224	0.0913394	0.0115256	0.298516	0.265368	0.247142	0	0.612074	0	0.0941921	0.0495095	0.37648	0.0926188	0.0375054	0.0344352	0.0736856	0.0713506	0.334071	0.010776	0.221325	0	0.130769	2.90742	0.309734	0.0625483	0.488944	0.522262	0.277642	0.156989	0.0528685	0.12359	0.211104	0.0107161	0.379225	0	0.189361	0.0416697	0.288694	0.0895516	0.279204	4.26988	0.246187	0.0829689
AP001825.1	0	0	0	0	0	0	0	0	0	0	0	0	0	0	0	0	0	0	0	0	0	0	0	0	0	0	0	0	0	0	0	0	0	0	0	0	0	0	0	0	0	0	0.0526313	0	0	0	0	0	0
AC073352.1	0	0.0388577	0.0900151	0	0.166827	0	0	0	0.0608294	0.0358068	0	0	0.255766	0.0358932	0.175257	0.0710178	0	0	0.209495	0	0.302902	0	0.0941431	0	0	0	0.134583	0.0313713	0	0	0	0	0.0725364	0	0.0956021	0	0	0	0.339345	0	0	0	0	0	0	0	0.0605792	0.108276	0.0312779
AC093281.2	0	0	0	0	0	0	0.0259644	0	0.0513534	0	0	0	0	0	0	0	0	0	0	0	0	0	0.0794776	0	0	0	0	0	0	0	0	0	0	0	0	0	0	0	0	0	0	0	0	0	0	0	0.0767134	0	0
AC010776.3	0	0	0	0	0	0.102705	0	0.0818608	0	0	0.0332962	0	0	0.127997	0	0	0	0	0	0.078431	0	0	0	0	0	0.0991788	0	0.0372904	0	0	0	0	0	0	0	0	0.0387677	0	0	0.0915037	0	0	0	0.0348297	0	0	0	0	0
AC090709.1	0	0	0	0	0.254435	0	0.194842	0	0	0	0	0	0.135027	0	0.102804	0	0	0	0.221199	0	0.0852865	0	0.231939	0	0	0	0.0947344	0	0	0	0.154915	0	0	0	0.134591	0	0	0	0.0796228	0	0.135782	0	0	0	0	0	0.0213212	0	0
LINC02293	0	0	0.407759	0	0.065714	0	0.0726882	0	0	0.0211567	0.033101	0	0	0	0.12081	0	0	0	0.0206302	0	0.0715887	0	0.361562	0	0	0	0	0	0	0	0.0487627	0	0	0	0.0753161	0	0.0192702	0	0.150378	0	0	0	0	0	0	0	0	0	0.0369615
AC127459.2	0	0	0	0	0.0300719	0	0	0.0558621	0	0	0	0	0.0172889	0	0	0	0	0	0	0	0	0	0	0.0227015	0	0	0	0	0	0	0.0148765	0	0	0	0	0	0	0	0	0	0	0	0	0.0158453	0	0	0	0	0
AP000320.1	0.216109	0.0415803	0.288966	0	0.208269	0.0462281	0.131641	0.110538	0.0650913	0	0.0599472	0.295255	0.273686	0.115224	0.062512	0.0759936	0.209706	0.157496	0.0747243	0.0706046	0.0324125	0.173393	0	0.134763	0.243433	0.223205	0.0720062	0.100708	0.165857	0.0647868	0.353245	0.345167	0.155237	0.0746667	0.1023	0.0597156	0.174496	0.178833	0.0907801	0.164746	0	0	0.19611	0.250833	0	0.118262	0.129647	0.0579314	0.0334694
LINC00430	0	0	0	0	0	0	0	0	0	0	0	0	0	0	0	0	0	0	0	0	0	0	0	0	0	0	0	0	0	0	0	0	0	0	0	0	0	0	0	0	0	0	0	0	0	0	0	0	0
AC243829.2	0	0	0	0.0249869	0	0	0	0	0	0.0295846	0.0231436	0	0	0.029656	0	0	0	0	0.057697	0	0	0.0267765	0	0.034685	0.0234953	0	0.0555982	0	0	0	0.0681879	0	0.0898975	0	0.0263298	0	0.0269467	0.0460275	0	0.0636026	0.0531255	0	0	0.0242095	0.0732194	0	0	0	0
Z84485.1	1.14102	0.160637	0.392793	0.093765	0.306515	0.0892963	0.900591	0.0474491	0.0733445	0.0246707	0.0868477	0.077772	0.220277	0.222572	0.0402504	0.0611637	0.0225043	0.0380283	0.493165	0.045461	0.146089	0.156303	0.275673	0.0578478	0.489819	0.129346	0.092727	0.0864588	0.146839	0.208575	0.104247	0.0185206	0.0499772	0.0480766	0.55989	0.0961246	0.22471	0.0767649	0.302001	0.132596	0.0886031	0.06621	0.0505088	0.0605651	0.0508816	0.0888376	0.344345	0.0559515	0.129302
ATG10-IT1	0	0	0	0	0	0	0	0	0	0	0	0	0	0	0	0	0	0	0.0361347	0	0	0	0.0487147	0	0	0	0	0	0	0	0	0	0	0	0	0	0	0	0	0	0	0	0	0	0	0	0	0	0.0323698
AC026362.1	0.0326125	0.013944	0.0242262	0.00813921	0.0374159	0.00775131	0.0910511	0.00926726	0.0381997	0.00963686	0.0125646	0.00225031	0.0717037	0.0225403	0.0628903	0.0286701	0.00586041	0.00660204	0.0563824	0.00591932	0.0706521	0.0348885	0.0380058	0	0.0510221	0.0112278	0.036221	0.0337725	0.0521439	0.0244421	0.0246794	0.014469	0.00325368	0	0.022871	0.00750963	0.0702208	0.0199906	0.0482017	0.00690594	0.017305	0.0206903	0.00986486	0.0131433	0.0530009	0.00991478	0.032608	0.0194273	0.011224
AL050403.2	0.0159167	0	0.0118237	0	0	0	0	0	0	0	0	0	0	0.028288	0	0	0	0.0144997	0	0.0130003	0	0	0.0185489	0.0165425	0	0	0.0265167	0	0	0	0.0108404	0	0.0142918	0	0.0125576	0	0	0.0219521	0	0	0	0.0302941	0.0288875	0	0	0	0.0119359	0.0213336	0.0123253
AC092436.2	0	0	0	0.0370852	0	0	0	0	0	0	0	0	0	0	0	0.0435438	0	0	0	0	0	0	0	0	0	0	0	0	0	0	0	0	0	0	0	0	0	0	0	0	0	0	0.0449479	0	0	0	0	0	0
TCERG1L-AS1	0	0	0	0	0	0	0.0328406	0	0	0	0	0	0	0	0.0311898	0	0	0	0	0	0	0	0	0	0	0	0	0	0	0	0	0	0	0	0	0	0	0	0	0	0	0	0.039139	0	0	0	0	0	0
AL138962.1	0.0495314	0	0.0367945	0	0	0	0	0	0	0	0.0686986	0	0	0	0	0.0435438	0	0	0.0428165	0	0.0371442	0.0397412	0.230891	0	0	0.0511579	0	0	0	0.0371223	0	0	0	0	0.0781565	0	0	0	0	0.094398	0	0	0.0898958	0.0359314	0.0362237	0	0	0	0.0767109
AC016822.1	0	0	0	0	0	0	0	0	0	0	0	0	0.0367045	0	0	0	0	0	0	0	0	0	0	0	0	0	0	0	0	0	0	0	0	0	0	0	0	0	0	0	0	0	0	0	0	0	0	0	0
C1orf137	0.0527394	0	0	0	0	0	0	0	0	0	0	0	0	0	0	0	0	0	0	0	0	0	0	0	0	0	0	0	0	0	0	0	0	0	0	0	0	0	0	0	0	0	0	0	0	0	0	0	0
C9orf147	0.0355485	0.0911958	0.0528144	0.0177439	0.163137	0.0380211	0.108271	0.0808125	0.0803033	0.09454	0.0575221	0.0441523	0.384542	0.115828	0.119966	0.0729194	0.114984	0.0323838	0.122917	0.0387133	0.0533165	0.0380294	0.124282	0.0615769	0.166847	0.0122386	0.118446	0.101236	0.125044	0.0710467	0.0645628	0	0.0638388	0.0409407	0.14958	0.0163714	0.0478391	0.0490281	0.0746637	0.090332	0	0.0902121	0.139788	0.0687674	0.0779927	0.0648442	0.124402	0	0.0642308
AC012368.2	0	0.0699439	0.054009	0.0816537	0.100096	0	0	0	0	0.0322261	0.0504199	0	0.0287737	0	0.0262885	0.223706	0.0587925	0.0331163	0.157121	0.0296917	0.0272612	0.0875017	0.169458	0	0	0.0750925	0.0605624	0	0.0348744	0	0.0247587	0	0.0979241	0	0	0.0502251	0	0	0.0763526	0	0	0.0345947	0	0	0.106342	0.0331555	0	0	0.0563003
HSD52	0	0	0	0	0	0	0.0997777	0	0	0.0204998	0.00534554	0	0.0122024	0	0.0891878	0.0203292	0.0249328	0	0.059969	0	0	0	0	0	0	0	0	0	0.0147896	0	0	0	0	0	0	0.00532489	0	0	0.00539662	0	0	0	0	0	0	0	0.00578037	0	0.011938
AL355432.1	0	0.0347239	0	0	0	0	0	0	0	0	0	0	0	0	0	0	0	0	0.0936041	0	0	0.0579207	0	0	0.0254116	0	0	0	0	0.0270519	0	0	0	0	0	0	0.0291445	0	0	0	0	0	0.0327546	0	0.0791912	0.0329203	0	0.0483789	0
AC098484.2	0.101618	0.0325862	0.150974	0	0.0699509	0.108686	0.103166	0.028876	0.382587	0.090083	0.0704704	0.0841415	0.482593	0.150501	0.0734854	0.0893336	0	0.123429	0.292805	0.0553324	0.228613	0.0271774	0.0394743	0.0352044	0.0238471	0.209909	0.112862	0.105232	0.0974857	0.101546	0.0922786	0.180337	0.0304146	0.0292579	0.13362	0.0233994	0.0273503	0.0467168	0.166002	0	0	0.0644694	0.0614762	0.0737161	0.222948	0.0308936	0.0254009	0.0908009	0.0262298
AC008050.1	0.0322111	0	0.382849	0.0241171	0.310426	0	0	0.109839	0.145528	0.0285548	0.379745	0.200036	0.101983	0.143119	0.0232936	0.0283172	0.208378	0.0586872	0.0278443	0.0263091	0.0241555	0.129222	0.0750761	0.0334776	0.113387	0.0332688	0.107326	0.0500353	0.216309	0.0241413	0.263257	0.0428728	0.0289227	0	0.101653	0.0445033	0.0780262	0.177701	0.608887	0.0613886	0.102552	0.0919607	0.175382	0.186934	0.0471138	0.0881348	0.04831	0	0.424034
AC016542.1	0.123879	0	0.0306745	0.0927506	0	0.176661	0.0314417	0.0704036	0.0932799	0.0366057	0	0	0.16342	0.0366941	0.0597224	0.0363012	0.0667825	0.0376169	0	0.0337269	0.0309661	0.0662623	0.144365	0.0429165	0.0581425	0	0	0	0.0396139	0.0309478	0.0562469	0.109921	0.0370774	0	0.130314	0.0285254	0.133367	0.0569509	0.0867291	0	0.0657334	0	0	0.11982	0.0301987	0	0.0309654	0.166039	0.0319758
AL121832.1	0	0	0	0	0	0	0	0	0	0	0	0	0	0	0.0106216	0	0.0237545	0	0.0126967	0	0	0	0	0	0	0	0	0	0	0	0	0	0	0	0.0115881	0	0	0	0	0	0	0	0	0	0	0	0	0	0
CU633906.1	0.00707346	0	0.00525453	0.00529605	0	0.00756547	0	0	0.079894	0.0125411	0.00490534	0.0175709	0.0111975	0.0314284	0.0460369	0	0	0	0	0	0.00530448	0	0.00824325	0.00735157	0	0	0.0117842	0	0.00678584	0.015904	0.0144526	0	0	0.0061098	0	0	0.00571144	0.00975565	0	0	0	0.00673143	0	0.00513127	0	0	0	0	0
AL445222.1	0.940072	0.654889	0.168563	0.266978	0.357032	0	0.27151	0.276345	0.122046	0.201157	0.404644	0.704585	0.744083	0.172836	0.609492	0.427464	0.157279	0.236244	1.51317	0.370674	0.291712	0.234081	0.679989	0.303217	0.319506	0.200884	0.324028	0.453186	0.373178	0.218655	0.264934	0.172584	0.0873209	0.196	0.230176	0.156754	0.261744	0.312958	0.476596	0.679576	1.34167	0.555279	0.558914	0.282187	0.0237069	0.0591308	0.291706	0.217243	0.0753061
AC104237.2	0	0	0	0	0	0	0.0349904	0.0391749	0	0	0	0.0570757	0	0	0	0	0	0	0	0	0	0	0	0	0	0.0474625	0	0	0	0	0	0	0	0	0	0	0	0	0.0321726	0	0	0	0	0	0	0	0	0	0
AC079600.3	0	0	0	0	0	0	0	0.0388244	0	0	0	0	0	0	0	0.160148	0	0	0	0	0	0	0	0	0	0	0	0	0	0	0	0	0	0	0	0	0	0	0	0	0	0	0	0	0	0	0	0	0
AC022613.3	0.120995	0	0	0.0226479	0.0104112	0.0161764	0	0	0.0341657	0	0	0.00939247	0.0359136	0.0403199	0.0546864	0.0398882	0	0	0.026148	0.0123532	0.011342	0.0364049	0.0176256	0	0.0106479	0	0	0	0	0	0.0103008	0	0	0	0.023865	0.020896	0.0122121	0	0.0105888	0	0.0240762	0	0.0548992	0.0219432	0.0221218	0.0137943	0.0453669	0	0.0234236
FALEC	0.467573	0	0.106873	0	0.0742765	0	0.62989	0	0.297913	0	0	0	0.170812	0	0.0260098	0	0	0	0.217638	0	0	0.0577161	0.125746	0.0747626	0.0759653	0.0742965	0.179761	0	0.0690093	0.080869	0.0489925	0	0.0322953	0	0.0851298	0	0.174249	0.0496056	0	0	0.229022	0.034228	0.163194	0	0.105215	0.065608	0.296688	0	0.0835552
AL135905.1	6.72781	1.15776	1.83108	0.835923	3.47343	1.07006	2.186	0.667481	2.21637	1.18254	1.54851	2.26012	7.19588	1.55905	3.14563	0.866782	1.0318	1.04349	2.93293	0.9119	13.4069	1.08193	2.6698	0.557578	1.53121	1.30289	2.36728	2.26356	5.63355	2.0104	4.41424	0.791254	1.38005	1.08961	1.80745	0.711165	3.6879	2.19975	1.21816	2.92916	0.807856	2.11117	2.55262	1.91434	2.13139	1.87787	2.59869	1.24379	0.842098
LINC01740	0	0.0589889	0	0	0	0	0.186756	0	0	0	0	0	0.0485339	0	0	0	0.198336	0	0	0.0500825	0.0919656	0	0	0	0.043169	0	0.204307	0.0476239	0.0588242	0	0	0	0.0550577	0	0.048377	0	0	0	0	0	0	0	0	0	0.0448432	0	0	0	0.0474822
AC034198.2	0.079833	0	0.0889561	0.0597726	0	0	0.0303936	0.0340284	0.0300569	0	0	0.0247888	0	0.106413	0.0577316	0.0701823	0.129113	0.145452	0.0690101	0	0.0299339	0.192161	0.139553	0.124458	0.140511	0.0412272	0.332499	0.0310022	0.11488	0.0299162	0.108744	0.106257	0.0358415	0	0.0629849	0.0275746	0.128922	0.110105	0.027946	0	0	0.0379864	0.0362227	0.0289565	0.0291921	0	0.0299333	0.0535013	0.0618199
AL450270.1	0	0	0	0	0	0	0.0792878	0	0	0	0	0	0	0	0	0	0	0	0	0.0425253	0	0	0	0	0	0	0	0	0	0	0	0	0	0	0	0.0359668	0	0	0	0	0	0	0.094494	0	0	0	0	0.0697843	0
AC109309.1	0	0	0	0	0	0	3.91973	0	0	0	0	0	0	0	0.0338427	0.0411414	0.0756869	0	0	0	0	0.0375486	0	0	0	0	0	0	0	0	0	0	0	0	0	0	0	0	0	0	0	0	0	0	0	0	0	0	0.0362393
AP000302.1	0.0305667	0	0.158946	0	0.0210413	0	0	0	0	0.108388	0	0.0189824	0.0483882	0.0543249	0.0221045	0	0	0	0.18496	0.0499321	0.0458447	0	0.106865	0	0.150638	0.0631408	0.0509233	0.284885	0.0293238	0.0458177	0.0208181	0.0406841	0.0274462	0	0	0.063347	0.024681	0.0421573	0	0.0582546	0	0.116355	0	0	0.0670628	0	0.0229219	0	0
AC006013.1	0	0	0	0	0	0	0	0	0	0	0	0	0	0	0	0	0	0	0	0	0	0	0	0	0	0	0	0	0	0	0	0	0	0	0	0	0	0	0	0	0	0	0	0	0	0	0.0201398	0	0
AC016745.1	0	0	0	0	0.0551713	0	0.152567	0.0341624	0.0905256	0.0355249	0.0277905	0	0.222033	0	0.0579589	0	0	0.0365062	0.138564	0.0327311	0	0.0321528	0	0.0416493	0.0282128	0.0413896	0	0.0311243	0.345998	0.15017	0	0.0533378	0	0	0.0316164	0.0276831	0.388288	0.110538	0.0841682	0.152746	0.0637925	0	0	0.145352	0.0879209	0	0.360613	0	0.0620633
LINC01346	0	0	0	0	0	0	0	0	0	0	0	0	0.00902451	0	0.00412253	0	0	0	0	0	0.00427507	0	0	0	0	0	0	0	0	0	0	0	0.00511878	0	0	0	0	0	0	0	0	0	0	0	0.00416913	0	0	0	0
AC002546.1	0.0348586	0.0335348	0.0776842	0.0260993	0	0	0	0.0297166	0	0	0	0	0.0275912	0.0309763	0.0756245	0	0	0.0635108	0.0301328	0	0.130704	0.0279686	0	0	0	0	0.0580735	0	0	0	0	0	0	0	0	0	0.0562929	0	0.0244049	0	0	0	0.253063	0	0	0	0	0	0.0539866
AL024508.2	0.0537419	0.186123	0.0319378	0.152903	0.984053	0.183936	0.0491048	0.183258	0.178056	0.285849	0.238523	0.32707	0.255226	0.14327	0.0466364	0.519698	0.208598	0.12729	0.334484	0.280927	0.0403017	0.129358	0.137785	0.178736	0.242148	0.399647	0	0.175308	0.113425	0.120834	0.0366021	0.386263	0.0579065	0.157829	0.16112	0.141076	0.373185	0.163065	0.0602005	0.327752	0.153991	0.15343	0.195075	0.241712	0.54238	0.382321	0.0644814	0.360159	0.0665854
LINC00895	0	0.0119635	0	0	0	0	0	0	0	0	0	0	0	0	0.00899302	0	0	0	0	0	0	0	0	0	0	0	0	0.00965861	0	0	0	0	0.0111663	0	0	0	0.0200825	0	0	0	0	0	0	0	0.0181893	0	0	0	0
AC113383.1	0.0148594	0	0.0551917	0	0.0409153	0	0.0678865	0	0.0111891	0	0.0103048	0	0.023523	0	0	0	0.0480639	0	0.231209	0.0121368	0.0111433	0	0.0519505	0.0154437	0.0732298	0	0.123777	0	0	0	0.0404814	0	0.0400274	0	0.0234469	0	0.0119982	0	0.0104033	0	0	0	0.0134844	0	0.0326013	0.0271052	0.011143	0	0.0115066
C3orf35	0.0596409	0.0255004	0.147681	0.0645007	0.0501785	0.0283508	0.232108	0.0338955	0.0449092	0.0704946	0.0505512	0.0246919	0.157356	0.0588873	0.0862592	0.198073	0.0535869	0.0301841	0.320789	0.0433005	0.0944204	0.0850711	0.154454	0.0413239	0.069981	0.0615993	0.1656	0.0308811	0.0890023	0.0496656	0.0270798	0.00882019	0.0595025	0.0171719	0.0993366	0.0320447	0.123067	0.0182791	0.0371158	0.088406	0.0949412	0.126127	0.0420948	0.0288434	0.0775414	0.0664836	0.0347857	0.0532923	0.0615784
AL358332.1	0.0250399	0	0.0186009	0.0187479	0.0172368	0.0267816	0.0190661	0	0	0	0.0173648	0	0	0	0	0	0.0404967	0	0	0.0409037	0	0.0200906	0	0	0.0176287	0	0	0	0	0	0	0	0	0	0	0	0	0	0	0	0	0	0	0	0.0183124	0	0	0	0
AL355574.1	1.70191	0.377832	0.243128	0.0490097	0.675892	0.420066	1.04668	0.223209	0.985788	0.116055	0.226971	0.284553	1.3989	0.407175	1.08873	0.057545	0.317593	0.0596307	0.792174	0	0.294526	0.210079	2.51734	0.340158	0.92168	0.473252	0.763358	0.508397	0.50237	0.0490588	0.490397	0	0.235102	0.11308	1.13616	0.226094	0.211415	0.451395	0.137484	0.249502	0.312604	0.186878	0.297003	0.142455	0.765939	0.0597012	0.981734	0.526412	0.861702
AC019118.1	0	0	0	0	0.0644299	0	0	0.0398954	0	0	0	0	0.0740839	0.0831733	0.135371	0	0	0.0426325	0.0809084	0	0.0701898	0	0.0545381	0.0486387	0	0	0	0	0	0.0350742	0.0318733	0	0	0.040423	0.0369222	0	0	0	0.0982929	0	0	0	0	0	0	0	0	0	0.0362393
AL583808.1	0	0.0784942	0	0	0.0280832	0	0.652337	0	0	0	0	0	0.226038	0	0.0885064	0	0	0	0.0705314	0	0.0305938	0	0.0950864	0	0.0287217	0	0	0	0	0	0	0	0	0	0.0643734	0	0	0	0.14281	0	0	0	0	0	0	0	0	0	0.157957
LINC02373	0	0	0	0.0720663	0	0.102948	0.0732896	0	0	0.0426634	0	0	0	0.0427664	0.139211	0.084617	0	0	0	0	0	0	0	0	0	0	0.0801771	0	0	0.0360692	0.0655549	0	0	0	0	0	0.0388594	0	0.0336938	0	0	0	0.0873456	0.034912	0.105588	0	0.0360897	0.0645051	0
U62317.3	0.272644	0.306005	0.337556	0.204134	0.0938404	0	0.242199	0.0387377	0.136866	0.120848	0.0315124	0.084658	0.323704	0.16152	0.131443	0.199738	0	0.0413954	0.314242	0.148459	0.272612	0.145836	0.264777	0	0.191948	0.281597	0.151406	0.282342	0.348744	0.0681129	0.0618967	0.48385	0.122405	0.03925	0.358508	0.0941721	0	0	0.0954407	0	0.217008	0.172974	0.0824714	0.0988915	0.132928	0	0.170379	0.121811	0.175938
AP001363.1	0.154223	0.074183	0.0572823	0	0.0530814	0	0.058715	0	0	0	0.0534757	0.191549	0	0.0685234	0.0557635	0.135579	0	0	0.0666575	0	0	0.12374	0	0	0.108577	0	0	0.179672	0.0739759	0	0.0525184	0	0	0	0.0608377	0	0	0	0	0	0.122752	0	0	0	0	0.0703298	0	0	0.0597124
AC096732.1	0	0	0	0	0	0	0	0	0	0	0	0	0	0	0	0	0	0	0	0	0	0	0	0	0	0	0	0	0	0	0	0	0	0	0	0	0	0	0	0.0813367	0	0	0	0	0	0	0	0	0
AC090772.1	0.240916	0.34765	0.626377	0.48101	0.552801	0.214728	0.244588	0.342298	0.634929	0.569519	0.361989	0.59845	2.0658	0.606574	0.725915	0.0705976	0.129877	0.548673	0.242965	0.229569	0.210777	0.128865	0.233965	0.0834628	0.593638	0.497654	0.0668933	0.374228	0	0.451399	0.464897	0.480987	0	0.208095	1.93241	1.22046	3.69601	1.16294	0.955787	0.0765238	0.894856	0.496745	0.801615	1.2525	0.323013	0.219729	0.662428	0.269089	1.15044
AL034397.3	0	0.302127	0.12498	0.243536	0.0540466	0.107967	0.0341615	0.0860553	0.0422287	0.308234	0.194457	0.215929	0.0710226	0.189374	0.0243332	0.335251	0.616754	0.26566	0.174521	0.146577	0.134579	1.11591	0.300636	0.384688	0.00789648	0.0695071	0.130801	0.426857	0.118361	0.226968	0.114586	0.403075	0.0704982	0.164699	0.0265474	0.232447	0.0452824	0.170162	0.078526	0.128256	0.0535646	0.213477	0.0916046	0.203413	0.188663	0.286434	0.08411	0.225501	0.078169
AL035401.1	0	0	0.520868	0	0.032178	0	0.889825	0	0	0	0	0	0.129498	0	0.321136	0.0205471	0	0	0.303058	0	0.157746	0	0.272377	0	0	0	0.233627	0	0	0	0.0795916	0	0	0	0.147519	0	0.301952	0	0.310904	0	0.0744124	0	0	0	0	0	0	0	0.199087
GTSE1-DT	0.147518	0.0645069	0.0597729	0.0401634	0.0553893	0.0430305	0.0612678	0	0.16157	0.0356653	0.0279003	0.0416412	0.0955331	0.0715027	0.077584	0	0.0867557	0.0855178	0.115926	0.0657208	0.0703979	0.0430399	0.093771	0.013938	0.0472072	0.0554042	0.201077	0.0729104	0.0900576	0.0301527	0.118737	0.0356991	0.0722497	0.0115837	0	0.0648493	0.0433136	0.0184959	0.103279	0	0.0213482	0.0255244	0	0.00972846	0.0980761	0.0122313	0.080453	0.0359495	0.0726934
DRAIC	0.902688	0.826723	27.1176	3.86052	4.46901	1.87689	6.02105	0.874189	3.23546	2.78478	0.841345	3.2469	27.7223	1.04601	1.94268	1.31414	1.00442	1.37493	12.5287	2.51269	6.15742	0.857531	2.17127	0.667984	17.2758	1.90195	3.40473	1.6602	0.242475	4.94685	5.29216	1.97042	0.343666	2.88805	6.78568	0.109751	10.6357	1.90233	32.6154	2.60119	2.14971	2.46029	20.5116	0.890573	2.81493	0.75085	6.35224	1.41316	2.53881
AP003501.2	0	0	0	0	0	0	0	0	0	0	0	0	0	0.0379249	0	0	0	0	0	0	0	0	0	0	0	0	0	0	0	0	0	0	0	0	0	0	0	0	0	0	0	0	0	0	0	0	0	0	0
AC009506.1	1.5125	0.445694	1.47784	0.306065	1.0224	0.845287	0.892279	0.394948	0.55406	0.555652	0.755961	0.592342	1.34816	1.04134	0.788303	0.754671	0.374635	0.397219	1.48413	0.511954	0.633541	0.819962	0.698701	0.481503	1.20873	0.844414	0.90803	0.645569	0.993476	0.449344	1.72615	1.12445	0.501637	0.5061	0.376265	0.310629	0.803172	0.582584	0.829963	0.49341	0.260294	0.700231	1.14996	0.780894	0.498258	0.869943	1.07291	0.657486	0.52758
AC116651.1	0.0732281	0.281789	0.299187	0.164482	0.0756124	0	0.58546	0.312131	0.275701	0.16229	0.431652	0.250117	0.173884	0.0976089	0.582508	0.804698	0.0592154	0.0667091	0.696307	0.269148	0.274573	0.146885	0.469361	0.0761073	0.438212	0.0756327	0.182994	0.170624	0.175626	0.219529	0.149621	0.243666	0.328762	0.316259	0.173322	0.177053	0.206947	0.302987	0.12817	0.13956	0.11657	0.209062	0.0664517	0.0796824	0.267769	0.16697	0.192197	0.0981499	0.453643
AL161733.1	0.132191	0	0	0	0	0	0	0	0	0	0	0	0	0	0	0	0	0	0	0	0	0.0353542	0	0	0.0620438	0	0	0	0.126816	0	0	0	0	0	0	0	0	0	0	0	0	0	0.0399861	0	0	0	0.0660864	0	0
LINC02504	0	0	0	0	0	0	0	0	0	0	0	0	0	0	0	0	0	0	0	0	0	0	0	0	0	0	0	0	0	0	0	0	0	0	0	0	0	0	0	0	0	0	0	0	0	0	0	0	0
LINC01163	0	0	0.023703	0	0.00439295	0.00682552	0.0583101	0	0.00480533	0.0113145	0.00442557	0	0	0	0	0	0.0103209	0	0	0.00521234	0.00478567	0	0.029748	0	0.00449283	0	0.0106316	0.00991294	0	0	0	0	0	0	0	0	0.00515282	0	0.00893572	0	0	0	0	0	0.00933414	0.0058204	0	0	0
LINC01887	0	0	0	0	0	0	0	0	0	0	0.0164158	0	0.0749454	0.0210351	0	0	0	0	0	0	0	0	0.0551722	0	0.0833263	0	0.0394359	0	0	0.017741	0	0	0	0	0	0	0	0	0	0	0	0	0	0	0	0	0	0	0
AC005393.1	0.104576	0	0.103579	0.104397	0.0239957	0	0.265424	0	0	0.0309018	0.0483479	0.0216477	0.193138	0.0309763	0.0756245	0	0.225505	0.0317554	0.331461	0.0284715	0.235268	0.223749	0.324987	0.0362292	0.0490826	0	0	0.0812216	0.0334412	0.0261255	0.0474824	0.0463966	0.1252	0.0301096	0.110008	0	0.281464	0.0480767	0.0732148	0	0.166472	0	0.0316329	0	0.101972	0.0635858	0.0522807	0.140166	0.0539866
CIRBP-AS1	1.02402	0.965424	0.380345	1.38006	0.59212	2.40953	1.13839	2.84586	0.339274	0.744378	0.35507	0.08903	0.713263	0.236592	1.18483	1.15229	2.74917	5.3919	1.4163	0.351283	0.706488	0.476535	1.12176	1.06428	0.720931	0.317292	2.90017	0.365851	1.13956	0.184193	0.446354	0.436147	0.294232	0.318423	0.403953	0.877171	0.413418	0.254216	0.415817	0.351286	0.358624	0.29235	0.353117	0.252568	0.808802	0.42962	0.614324	0.247053	0.459918
PCDH9-AS2	0	0.812386	0	0.158065	0.0207607	0.612882	0.780779	0.69418	0	0.668394	0.481043	1.36724	0.0238715	0.375204	0.0218097	0.980993	0.536536	0.906651	1.92922	1.03459	0.0226167	1.64546	0	0.0940348	0	0.155747	0	0.210815	0	0.113017	0	1.16411	0	0.781512	0	0.333346	0	0.374357	0	0.804691	0	0.487914	0	2.05655	0	2.09051	0	0.363809	0.0467084
AC136188.1	0	0	0	0	0	0	0.453239	0	0	0	0	0	0	0	0.215228	0	0	0	0	0	0	0	0	0	0	0	0.0991664	0	0	0	0	0	0	0	0	0	0	0	0	0	0	0	0	0	0	0	0	0	0
LINC01892	0	0	0	0	0	0	0	0	0	0	0	0	0	0	0	0	0	0	0	0	0	0	0	0	0	0	0	0	0	0	0	0	0	0	0	0	0	0	0	0	0	0	0	0	0	0	0.0187312	0	0
CCNT2-AS1	1.00669	0.150649	0.531781	0.184244	0.338788	0.119634	0.698386	0.133496	0.235831	0.218146	0.32579	0.152819	0.230189	0.258431	1.00301	0.452329	0.10854	0.122276	0.638154	0.182718	0.0671045	0.161542	0.443197	0.0930014	0.724481	0.0462108	0.708114	0.156374	0.257534	0.301792	0.182833	0.0893262	0.080348	0.0966155	0.317693	0.169993	0.343201	0.308536	0.422876	0.213174	0.320505	0.276758	0.365412	0.178512	0.409009	0.24484	0.251637	0.20989	0.433079
UVRAG-DT	0.133404	0.0641688	0.0297297	0.0699175	0.52344	0.0570732	0.0812622	0.0341176	0.180814	0.0946088	0.0555081	0.190545	0.179505	0.15411	0.520947	0.0234554	0.0215752	0.0607639	0.311359	0.0544803	0.0800329	0.0642214	0.373118	0.110919	0.43203	0.192898	0.0888989	0.0207223	0.204767	0.0499911	0.0272573	0.124292	0.119785	0.0806606	0.0842	0.00921562	0.312377	0.0183989	0.448309	0.0762731	0.0424726	0.0761719	0.145271	0.145162	0	0.0608357	0.0400156	0.0178805	0.144625
AC090124.1	0	0	0	0	0	0	0.0545801	0	0	0	0	0	0	0	0.0259183	0	0	0	0	0	0	0	0	0	0	0	0	0	0.10315	0	0	0	0	0	0.0282767	0	0	0	0	0	0	0	0	0	0	0	0	0	0
AC073174.1	0	0	0	0	0	0.209864	0.0373512	0	0	0	0.306164	0.243706	7.06654	5.57962	0.0354737	0	0	0.0893742	0.254423	0.40066	0	0	0	0	0	0	0	0.114297	0	0	0	0	0.880924	2.2033	4.68289	0.169434	0	0	1.57979	1.96325	0	0	0	0	0.896864	0.671099	0	0	0
AL365356.1	0	0.0138699	0.04284	0.0107946	0	0	0.0329336	0	0.0542812	0.0255618	0.00999828	0	0.0114117	0	0	0	0	0.013134	0.0373886	0.0235515	0	0.0115677	0.0168017	0.0299686	0	0	0.0240191	0	0	0	0	0	0	0	0.0341243	0.00995965	0.0116413	0	0.0403753	0	0	0	0.0130833	0	0	0	0	0	0.0111644
LINC01509	0.0453395	0	0	0	0	0	0.103569	0.0386514	0.102421	0	0	0	0	0	0	0	0	0	0	0	0	0	0.0528376	0	0	0	0	0	0.130488	0	0	0	0	0	0	0	0	0	0	0	0	0	0	0	0	0	0.102	0	0
AP005019.1	0.0919763	0.176967	0.0455498	0.137729	0.126628	0.131165	0.0933781	0.261363	0.0923434	0.217429	0.14883	0.0761582	0.145602	0.217954	0	0.161715	1.04126	0.614447	0.159014	0.125206	0.114957	0.688768	0.571664	0.127457	0.0215845	0.063331	0.204307	0.190496	0.205885	0.0919113	0.0835233	0.24484	0.0275289	0.26482	0	0.190613	0.0495106	0.0845686	0.0643937	0.23372	0.0488051	0.320939	0.083465	0.0889626	0.807178	0.0279625	0.0459818	0.0821858	0.189929
AC100782.1	0	0	0	0	0.0712551	0	0	0	0	0	0	0	0	0	0	0	0	0	0.0894792	0	0	0.0276841	0	0	0	0	0	0	0	0	0	0	0	0	0	0	0	0	0	0	0	0	0	0	0	0	0	0	0
AC025031.1	0.144893	0.348475	0.107634	0.108484	0.0748052	0.0387427	0.0551628	0.0617598	0	0.0642229	0.502405	0.157466	0.0860138	0.0965668	0.10478	0.254754	0.17575	0.131994	0.0313124	0.14793	0.0271642	0.581269	0.0422136	0.112942	0	0	0.482775	0.196936	0.104251	0.29863	0	0	0.0650504	0.156441	0.0285786	0.125116	0	0.199835	0.0253603	0.0690349	0.057663	0.0689433	0.0328712	0.131386	0	0.330375	0.135818	0.097102	0.0560999
CH17-340M24.3	12.1532	2.58722	5.91751	1.70772	6.88958	3.20412	19.5704	2.37971	3.02479	4.07407	2.6677	3.34026	9.18833	2.6016	4.03735	3.17229	4.29441	2.48096	4.03155	3.67026	7.93949	5.16231	5.83183	2.93662	6.11152	3.19959	5.33111	2.88196	10.6139	4.10773	5.47175	5.34663	12.991	1.8525	10.5284	1.64617	4.23307	3.09877	5.29105	3.6981	2.49281	3.88757	2.62584	3.11161	3.88381	2.39074	6.56079	1.64262	8.09293
AL024497.2	0.128438	0	0	0	0	0	0	0	0	0	0	0	0.0508305	0	0	0	0	0	0	0	0	0.0515257	0	0	0	0	0	0	0	0.0481302	0	0	0	0	0	0	0	0	0	0.12239	0	0.0611137	0	0	0	0	0	0	0
AC007389.5	0.0547243	0.210584	0.243912	0.0409732	0.150683	0	0.687534	0.0933037	0.041207	0.0242562	0.0379505	0.0509769	0.0649728	0	0.0791482	0.0240544	0.221262	0.224336	0.496706	0.0223486	0.51298	0.131723	0.0318872	0	0.2119	0.0565212	0	0.0850062	0.367493	0.0615213	0.0931778	0.0728377	0.3931	0.0236344	0.280638	0	0.220934	0.226426	0.191566	0	0.348458	0.234351	0	0.0992459	0.120064	0.0249557	0.143631	0.146697	0.105941
LINC01208	0	0	0	0.0146558	0	0	0.566374	0	0	0	0.0135746	0	0.216909	0	0.0424661	0.0172082	0	0	0	0	0.0146791	0	0	0	0	0.0202172	0.358715	0	0.0187785	0	0.0133316	0	0	0	0.138991	0	0.110637	0	0	0.0373054	0	0	0.0177631	0	0.042946	0	0	0	0.0151578
AC082651.3	0	0.0100587	0	0	0.014395	0.0223661	0	0	0	0.00926894	0.0145019	0.0129864	0.00827594	0	0	0	0	0	0.0090383	0.02562	0	0.00838914	0.0243699	0	0.00736113	0	0	0.00812077	0.0200613	0	0	0	0	0.00903134	0	0.00722292	0.00844248	0.0144205	0	0.0199269	0	0	0	0.0227547	0.00764661	0.0190725	0	0.0280284	0
LINC00051	0	0	0	0	0	0	0	0	0	0	0	0	0	0	0	0	0	0	0	0	0	0.0156153	0	0	0	0	0	0.0151158	0	0	0	0	0	0	0	0	0	0	0	0	0	0	0	0	0	0	0.0145946	0	0
EZR-AS1	0	0	0	0.140479	0	0	0.0714321	0	0.211922	0	0.0650579	0	0.148509	0.0833649	0	0.164945	0	0	0.243284	0.0766238	0.281406	0	0	0.0975015	0	0	0.15629	0.145725	0.179997	0	0	0	0.168472	0	0	0	0	0	0.131359	0	0	0	0	0.0680544	0.137216	0.0855625	0	0.12574	0.0726455
CU634019.6	0.0569279	0	0	0.00852462	0.0627002	0	0.026008	0	0.0342931	0.0302796	0.00789573	0.0141412	0.0720951	0	0.0247006	0.0100092	0	0	0.0393682	0	0.042691	0	0	0	0.0240472	0	0.0379361	0	0.0109226	0	0	0	0.0102232	0.00983446	0.0269482	0	0	0	0.0318847	0	0	0.0216701	0	0	0.0582861	0	0.017076	0	0.0352664
AL049775.2	0	0	0	0.0273154	0	0	0	0	0	0.0323416	0	0	0	0	0	0.0320726	0.0590032	0	0.0946106	0	0	0	0	0	0.102739	0	0	0	0	0	0	0	0	0	0	0	0	0	0	0	0	0	0	0	0	0	0	0	0
DLG1-AS1	0	0.023122	0.00892711	0.00899765	0.00827243	0.0642663	0.0274512	0	0	0.0213065	0.0250016	0.0298519	0.0665837	0	0.0869042	0.0633878	0	0	0.0415527	0.0294464	0.0630838	0.0192841	0.0140048	0	0.0423026	0.012412	0.100103	0.0466681	0.0230574	0.0360266	0	0.0639802	0.0215811	0.0415207	0.0568872	0.00830167	0.077627	0.0165742	0.0252405	0.0458059	0.0191302	0.0457451	0.0109053	0.0435885	0.0175773	0.0328815	0.1532	0.0161072	0.00930583
AC022166.2	0	0	0	0	0	0	0	0	0	0	0	0	0	0	0	0	0	0	0	0	0	0	0	0	0	0	0	0	0	0	0	0	0	0	0	0	0	0	0	0	0	0	0	0	0	0	0.0284813	0	0
AC103808.6	0	0	0	0	0	0	0	0	0	0	0	0	0.486176	0.0389875	0.0317275	0	0	0	0.0379258	0	0.559325	0	0.255647	0	0	0	0	0.0681515	0	0	0	0	0	0	0	0	0	0	0.79863	0	0	0	0	0	0	0	0	0	0
AL162311.3	0.11361	0.0204928	0.0580216	0.0478473	0.0879815	0.0075945	0.113539	0.0181596	0.0695072	0.0125892	0.0393933	0.0396862	0.303493	0.100957	0.0359438	0.0187267	0.080386	0.109964	0.0306899	0.0115991	0.0798724	0.0341827	0.115848	0.0147596	0.0649869	0.0440026	0.106465	0.110297	0.0136237	0.0745037	0.0290161	0.0283526	0.0127514	0.0797322	0.0504187	0.0245257	0.0630668	0.0391723	0.0397697	0.0676623	0.0791232	0.0473008	0.180419	0.0206038	0.0675073	0.0777136	0.127793	0.0571029	0.0219938
AC015911.5	0	0	0	0	0	0	0	0	0.0339889	0	0	0	0	0	0	0	0	0	0.039019	0	0	0	0	0	0	0	0	0	0	0	0	0	0	0	0	0	0	0	0	0	0	0	0	0	0.033011	0.0411687	0	0	0
FAM95B1	0.00256941	0.00494366	0	0	0.00353742	0	0	0.00219039	0	0.00227775	0	0.00319128	0.00203373	0.00228325	0.00557424	0.00451761	0	0.00234067	0	0	0	0	0.017966	0.00267043	0.00180893	0	0	0	0	0.0019257	0	0	0	0	0.00202716	0.00177496	0	0	0.00359775	0.00489683	0.0122706	0	0	0.00372783	0	0	0.00192679	0.00344386	0.00198966
AL391261.4	0.0423231	0.0407158	0.0314398	0	0.0874023	0.045267	0	0.03608	0	0.037519	0	0.0262833	0	0.0752191	0	0.223241	0.273795	0.231332	0.0365854	0.103705	0	0.101873	0	0.0439872	0.0297965	0	0	0	0.284215	0.0634398	0	0.112664	0.0380024	0.109672	0	0.0292371	0.170868	0.116743	0	0.0806603	0	0	0.0768132	0	0.15476	0.115803	0	0.113454	0.0327736
LINC00550	0	0	0	0	0	0	0	0	0	0	0	0	0	0	0	0	0	0	0	0	0	0	0	0	0	0	0	0	0	0	0	0	0	0	0	0	0	0	0	0	0	0	0	0	0	0	0	0	0
AC103796.1	0	0	0	0.0425755	0	0	0	0.145429	0	0	0	0	0	0	0	0	0	0.0518021	0	0	0.0426433	0	0.0662683	0	0	0	0.0947344	0	0	0	0	0	0	0	0.134591	0	0	0	0	0	0	0	0	0.0412508	0	0	0	0	0
AC000036.1	0.0100283	0.00964744	0.014899	0.00750838	0	0	0.00763584	0	0	0	0.0139089	0	0	0.0178228	0.007252	0	0	0	0	0	0	0	0.0116867	0	0	0	0	0	0	0.0150318	0	0	0	0	0	0.0069276	0	0	0.00702092	0	0.0159638	0	0.0273009	0.00727478	0	0.00914634	0	0	0
LINC00534	0.015035	0	0	0	0	0.0160808	0	0	0	0	0	0	0.0357015	0.0133606	0.0108726	0	0	0	0	0	0.011275	0.0120633	0.0175215	0	0	0	0	0	0	0	0.0204799	0.0200115	0.0135001	0	0.011862	0	0	0.0207362	0.0315786	0.0286541	0	0	0	0	0	0	0	0	0.0116426
AC003988.1	0	0.0677658	0.0784906	0.0263703	0	0.113011	0.107272	0.0600502	0	0.0312225	0.0976995	0.371831	0.0278776	0.406873	0	0.0928884	0.113923	0	0	0.0287671	0.0528245	0.0565178	0	0	0	0.036377	0	0.0273549	0	0.0263967	0	0.0937565	0	0.0608443	0	0	0.0853158	0.0971515	0	0	0.112134	0.13407	0	0.127749	0	0	0.0792351	0	0
AL354811.1	1.78776	0.194179	0.771121	0.518142	0.277888	0.524289	0.087823	0.467047	0.977061	1.17584	0.979832	0.787903	0.821639	1.05056	1.0009	0.963267	0.466343	0.394019	1.04688	0.376824	1.12443	0.393303	1.0081	0.299686	0.426309	0.655198	0.480381	0.515094	0.0276624	0.648327	0.805183	0.614065	0.207129	0.423411	0.0909981	0.318709	0.302674	0.835145	0.201876	1.42881	0.642623	0.631134	0.654164	0.502021	0.46393	0.894165	0.367594	0.270538	0.669862
AC008549.1	0	21.5641	0.117594	21.0496	18.4813	29.2908	20.4668	12.6043	1.64495	19.6183	19.1894	30.1016	1.47851	37.2776	1.3966	11.1331	5.42756	14.1901	2.38101	25.8591	0.997176	17.2227	5.46059	17.5383	0.0891578	20.9278	0.632938	10.6965	42.218	38.5347	0.0862511	38.0519	10.4899	21.686	5.5702	6.86748	20.9367	12.2263	5.5414	16.3517	2.97354	22.2353	0	29.3289	0.115769	21.7723	27.1606	19.6474	2.81939
AC009065.1	0.0664732	0	0	0.0124425	0.0915167	0	0.0126537	0.0141669	0	0	0	0	0.105229	0	0.0120176	0.0438281	0	0.0151389	0.0287307	0.0135734	0.16201	0	0.0193666	0	0.0467987	0	0	0	0	0	0	0	0	0	0.0393334	0	0	0	0.0232693	0	0	0	0	0	0	0	0.024924	0	0
C15orf54	0.00661385	0	0	0	0.022764	0	0.00503598	0	0	0.0117262	0.00458661	0	0.01047	0	0.00956567	0	0	0	0.0114344	0.00540201	0.00495981	0	0.0308305	0	0.0279378	0	0	0	0.00634491	0	0.018018	0	0	0.00571281	0	0	0	0.00912176	0.0277826	0	0	0.00629404	0.00600181	0.00479785	0.0193476	0.00603219	0.0049597	0.0177295	0.00512153
LMLN-AS1	0	0	0	0.0562436	0	0	0	0	0	0	0.0260472	0	0	0	0	0.0660387	0.060745	0	0	0.0306778	0	0	0	0	0	0	0	0.0583437	0	0	0	0	0	0	0.0888994	0	0.0303275	0.0518022	0	0.0715823	0	0	0.102252	0.0544937	0	0	0	0	0
LINC-PINT	0.163007	0.174569	0.0434096	0.154285	0.0211716	0.0559221	0.0960162	0.154693	0.0440023	0.269922	0.0725181	0.0381999	0.0219095	0.0327968	0.0867414	0.294715	0.179069	0.142892	0.0691248	0.0778741	0.0207579	0.0444184	0.136201	0.0511445	0.0173224	0.0603553	0.0461149	0.05733	0.0118022	0.0161355	0.0146629	0.0491233	0.0497092	0.039849	0.0291183	0.0446176	0.0173837	0.0254511	0.0344523	0.0293077	0.102816	0.172686	0.0223279	0.0379291	0.105716	0.0617126	0.0807235	0.0206116	0.0381063
BRWD1-AS2	0.594088	0.247661	0.308923	0.177922	0.913331	0.275345	0.256336	0.236345	0.268407	0.403767	0.13733	0.159873	1.00316	0.0703898	0.587144	0.191499	0.256216	0.1804	0.291011	0.307315	0.742524	0.38133	0.207701	0.123489	1.47783	0.347705	0.230938	0.107663	2.86865	0.207784	0.512514	0.131788	0.355626	0.153946	0.359345	0.05472	0.239847	0.245808	0.346607	0.150963	0.346763	0.113072	1.13214	0.244215	0.202754	0.252859	0.668257	0.159255	0.199351
AC087318.1	0	0	0	0	0	0	0	0	0	0	0	0	0	0	0	0	0	0	0	0	0	0	0	0	0	0	0	0	0	0.0392218	0	0	0	0	0	0	0	0	0	0	0	0	0	0	0	0	0	0	0
AC104002.3	0	0	0	0	0.0102889	0	0.0796662	0	0	0	0	0	0	0	0	0	0	0	0	0	0	0	0	0	0	0	0	0	0.12905	0	0	0	0.0268417	0	0.0117923	0	0	0	0.0313931	0	0	0	0	0	0	0	0	0	0
AC008764.6	0.275499	0.123053	0.343528	0.125237	0.433477	0.0841892	0.31466	0.0838787	0.0889067	0.392508	0.204701	0.201641	0.498428	0.183612	0.34865	0.207596	0.0954774	0.02689	0.323203	0.128583	0.427958	0.189467	0.412792	0.173844	0.68578	0.142273	0.131135	0.840612	1.85952	0.52357	0.221141	0.183344	0.238539	0.118983	0.0388138	0.0747672	0.667352	0.339255	0.303098	0.281278	0.422899	0.205997	0.276791	0.292644	0.323807	0.2064	0.199217	0.131879	0.0990493
LINC01001	0.0372749	0.0256138	0.0158227	0.0478431	0.0366558	0.00569538	0.36086	0.0226975	0.0441065	0.0283232	0.0295424	0.0264552	0.101156	0.0331235	0.100121	0.051494	0	0.0242547	0.0920616	0.0304451	0.0399327	0.0299073	0.186168	0.0387405	0.0487359	0.00549984	0.0443564	0.0454937	0.00510846	0.0359183	0.0471471	0.00708753	0.00478137	0.00919907	0.0378107	0.0404639	0.0429964	0.0220325	0.0633775	0.0608908	0.0508604	0.0557425	0.0241611	0.0347659	0.0467317	0.0339967	0.0559046	0.028549	0.0288644
AC023043.4	2.26697	0.523411	0.269444	0.339466	0.436947	0.290959	0.96664	0.231909	2.04842	0.68328	0.314423	0.47866	0.645966	0.24174	0.721324	0.637737	0.879923	0.454335	1.95964	0.37032	0.510009	0.181889	0.898238	0.0471221	0.478801	0.468283	0.755343	0.809925	0.347967	0.0679612	0.123518	0.18104	0.569952	0	0.429251	0.375849	0.292873	0.0625318	0.857053	0.259227	0.43305	0.388324	0.576014	0.197342	0.16579	0.20676	0.441999	0.12154	0.912842
AC109347.2	0.349984	0.224462	0.173324	0.611428	0.321226	1.43492	0.222074	0.895074	0.966298	0.620514	0.606772	0.470915	0.877226	0.881184	0.295275	0.82047	0.943375	1.91297	1.41184	0.190572	0.74363	0.37441	0.679773	0.363745	0.369596	0.240984	1.45766	0.226521	0.279794	0.218586	0.476729	0.232914	1.04752	0.403072	0.276123	0.685019	0.42389	0.160898	0.285866	0.555839	0.928555	0.388571	0.158799	0.253888	2.51687	0.372405	0.393678	0.234547	0.542032
LINC00596	0	0	0.0161393	0	0	0	0	0	0	0	0.0150668	0	0.0171966	0	0	0	0	0	0	0	0	0	0	0	0.0152957	0	0	0	0	0	0	0	0	0	0	0	0	0	0.0152108	0	0	0	0	0	0.0158889	0	0	0	0
C7orf69	0.0251948	0	0	0	0.0173434	0	0	0	0	0	0.0349445	0	0	0	0	0	0	0	0	0	0.0188939	0.0202149	0.0293615	0	0	0	0	0	0.0483407	0	0	0	0	0	0	0	0	0	0	0	0	0	0.0457267	0	0	0	0	0	0.01951
AC096669.1	0	0.0150071	0	0	0.0644299	0	0.011878	0	0	0	0	0	0	0	0	0	0	0	0.161817	0	0.0116983	0	0	0	0	0	0	0	0	0	0	0	0	0	0	0	0	0	0	0	0	0	0	0	0	0	0	0	0
LINC02270	0	0	0	0	0	0	0.0160132	0	0	0	0	0	0	0	0	0.0184881	0	0	0	0	0	0	0	0	0	0	0	0	0	0	0	0	0	0	0	0	0	0	0.0147236	0	0	0	0	0	0	0	0	0	0
FRMD6-AS1	0.164394	0.0351446	0.0542756	0.0341903	0.0754428	0.0195365	0.0486789	0.0389289	0.144419	0	0.0190008	0.0226869	0.0289157	0.0243475	0.0132091	0.0240868	0	0.0166399	0	0.00745957	0.0273958	0.036639	0.0532168	0.00949207	0.0128597	0.0471644	0.0608612	0.0212801	0.0963778	0.0136898	0.00622022	0.0364679	0	0.00788875	0.0144111	0.0189274	0.00737439	0.0377884	0.0191823	0	0.0581545	0.0173827	0.0663027	0.0066253	0.0601128	0.0333191	0.0273952	0	0.0141445
AC009686.2	0.070563	0.0339416	0.524178	0.0792479	0	0.0377356	1.31636	0.150386	1.7534	0.18766	0.17127	0.0219103	0.279259	0.156761	0.408224	0.310165	0.0570603	0.0964219	0.243987	0.115268	0.740825	0.113232	0.575627	0.0733374	1.09292	0.29152	0.29389	0.246621	0.304622	0.158655	0.144175	0.187838	0.190078	0.0609498	0.528877	0.0243727	0.227903	0.2433	0.098804	0.403441	0.449311	0.235028	0.160083	0.0511882	0.33543	0.128715	0.370405	0.378311	1.47532
AC012309.2	0	0	0	0	0	0	0	0	0	0	0	0	0.0505118	0	0	0	0	0	0	0	0	0	0	0	0	0	0.106316	0	0	0	0	0	0	0	0	0	0	0	0	0	0	0	0	0	0	0	0	0	0
AC023908.3	0.0267245	0.00642741	0.0297785	0.0100046	0.0781849	0	0.147529	0	0.0100617	0.0118455	0.00463327	0	0.0475941	0.0178111	0.038652	0	0	0	0.138609	0.0163709	0.0551129	0.0589662	0.0856464	0.00694382	0.0329258	0	0.0111306	0.0259454	0.0128189	0.0300439	0.027302	0.0177851	0.00599907	0.0115419	0.0210846	0.00923074	0.0593412	0	0.0327428	0	0.0531779	0.0190742	0.0363773	0	0.048861	0.00609356	0.0200406	0.0179099	0.0413891
AL356133.2	0	0	0	0	0	0	0	0	0	0	0	0	0	0	0	0	0	0	0	0	0	0	0.0639463	0	0	0	0	0	0	0	0	0	0	0	0	0	0	0	0	0	0	0	0	0	0	0	0	0	0
AC012594.1	0	0.0111889	0	0	0	0	0	0	0	0	0.00268855	0	0	0	0	0	0	0	0.00335128	0.00316652	0	0	0	0	0	0	0	0	0	0	0	0	0	0	0	0.00267816	0	0	0	0	0	0	0.00351811	0	0	0	0.0058145	0.00519628	0
AC026979.3	0.0946857	0.121453	0.16412	0.0945242	0.0869054	0.37133	0.0480644	0.269062	0.308957	0.307772	0.131326	0.137203	0.174873	0.252421	0.159769	0.0832395	0.0510446	0.0575043	0.381963	0.206231	0.284024	0.126617	0.220689	0.164014	0.111102	0.0977949	0.315488	0.0980536	0.0302785	0.0946188	0.0859837	0.168035	0.170039	0.13631	0.149406	0.152622	0.382268	0.13059	0.0662906	0.240605	0.251214	0.0901072	0.114565	0.160271	0.207739	0.259075	0.0473363	0.0423034	0.0977618
LINC01928	0	0	0	0	0	0	0	0	0	0	0	0	0	0	0	0	0	0	0	0	0	0	0	0	0	0	0	0	0	0	0	0	0	0	0	0	0	0.0557079	0	0	0	0	0	0.0586024	0	0	0	0	0
AC005625.1	0.0431301	0	0	0	0	0	0	0	0.0324767	0	0	0	0	0	0	0	0	0	0.037283	0	0	0	0	0.0448259	0.151823	0	0	0.0669964	0.0413764	0	0	0	0	0	0	0	0.0348252	0	0	0	0	0	0	0	0.0315423	0	0	0	0
AC026401.2	0	0	0	0	0	0	0.0924499	0	0	0	0.0280667	0	0	0	0.175605	0	0	0	0.0349852	0	0	0	0.0471651	0	0	0	0.134851	0	0	0	0	0	0	0	0	0	0.032679	0	0	0	0	0	0	0	0	0	0	0	0.0313401
AC107905.1	0	0	0	0	0	0	0.0727735	0	0	0	0.0331398	0.0296767	0	0	0	0	0	0	0.289162	0	0	0	0	0	0	0	0	0.0371154	0	0	0	0	0.0429088	0	0.0377022	0	0.0771714	0	0	0	0.0760718	0	0	0.0346662	0	0.0871693	0	0	0
CLEC12A-AS1	0	0.00495053	0	0	0	0	0.0156732	0	0.0154995	0	0.00356865	0.0127829	0	0.00457285	0	0	0.00832249	0	0.00889665	0	0.00385902	0.0371595	0.00599698	0	0.0108686	0	0.0171461	0.00399675	0	0.00771349	0.00700954	0	0	0	0	0.00710972	0	0	0	0.00980728	0.00819176	0.00979426	0	0.011199	0.0715043	0.00938679	0.00385894	0.0137946	0.00796971
AC053527.1	0.237751	0.142951	1.08176	0.111256	0.552357	0.190716	0.339433	0.10134	0.46994	0.131727	0.144267	0.22147	0.282276	0.237681	0.515792	0.235136	0.192256	0	0.513798	0.218462	0.200579	0.166913	0.242436	0.185324	0.167382	0.214863	0.0495108	0.11541	0.68425	0.200461	0.222647	0.27689	0.213479	0.179691	0.773749	0.18477	1.2958	0.245928	0.416131	0.113278	0.331162	0.113127	0.512406	0.129353	0.56509	0.162631	0.51258	0.358498	0.391225
AC084026.2	0	0.0305051	0	0	0	0	0.0241445	0	0.238769	0	0.02199	0	0	0	0	0	0	0	0	0	0	0	0	0	0	0	0.052827	0.024628	0	0	0	0.042205	0	0	0	0	0	0	0	0	0	0	0.0287751	0	0.0463799	0	0	0	0.0245546
AC008687.2	0	0	0	0	0	0	0	0	0	0	0	0	0	0	0	0	0	0	0	0	0	0	0	0	0	0	0	0	0	0	0	0	0	0	0	0	0	0	0	0	0	0	0	0	0	0	0	0	0
WAC-AS1	18.718	2.20931	10.8473	1.56408	5.06638	2.20472	4.18726	1.47422	5.96388	2.85754	3.58816	2.89531	5.90765	3.98316	7.04314	4.66416	2.99816	1.7392	5.78813	2.20907	4.73602	5.9718	4.05478	1.68946	7.77236	2.87204	10.579	3.66939	7.3062	2.27071	7.28812	2.42139	2.04965	1.69089	4.27861	1.49566	6.34489	1.62183	4.17937	3.00573	3.22634	3.13998	3.78511	3.68819	4.49724	4.60549	6.74856	2.29003	4.51015
AC087667.1	0	0.0137724	0	0	0	0	0	0	0	0	0.0198559	0.0266714	0.0113314	0	0	0	0.0231532	0	0	0	0	0	0	0	0	0	0	0.0222379	0	0	0	0	0	0	0	0	0	0	0	0	0	0	0	0	0	0	0	0	0
AC093871.1	0	0	0	0	0	0	0	0	0	0	0	0.0236747	0	0	0	0	0	0	0	0	0	0	0	0	0	0	0	0	0	0	0	0	0	0	0	0	0	0	0	0	0	0	0	0	0	0	0	0	0
AC087203.3	0	0	0	0	0	0	0	0.0448726	0	0	0	0	0.0312474	0.0233874	0	0	0	0	0.0113753	0.0107481	0.0197366	0.0422331	0.0306711	0.0136767	0	0.0135914	0.109615	0.020441	0	0	0.0179248	0	0	0	0	0	0.0531271	0.0362983	0	0	0	0	0.0119416	0.0190922	0.0192475	0	0.00986811	0.0352756	0
AL162872.1	0	0	0	0	0	0	0	0	0	0	0	0	0.0359671	0	0	0	0	0	0	0	0	0	0	0	0	0	0	0	0	0	0	0	0	0	0	0	0	0	0	0	0	0	0	0	0	0	0	0	0
AL162427.1	0	0	0.0344477	0	0	0	0	0	0	0	0	0	0	0.0824154	0	0	0	0.0422441	0	0	0	0	0	0	0.0326472	0	0	0	0	0	0	0	0	0	0	0	0	0	0	0	0	0	0	0	0	0	0.0347744	0	0
AC104794.4	0.912889	0.351288	0.101721	0.0683499	0.125682	0.244097	0.104265	0.233469	0.10311	0.24278	0.158269	0.0850377	0.108385	0.0811219	0.033008	0.36114	0.22146	0.249486	0.67076	0.186406	0.102688	0.14649	0.053193	0.237195	0.0321348	0.188573	0.0760424	0.106353	0.131365	0.0684183	0.0621743	0.121505	0.204923	0	0.0360116	0	0.0368554	0.0629524	0.0319562	0.17398	0	0.0868747	0.0414206	0.165558	0.033381	0.124891	0.0684572	0.0611786	0.106036
AC016877.3	0	0	0	0	0.0834137	0	0	0	1.67281	0	0.0280111	0	0	0	0	0	0	0	1.5363	0	0.302902	0	0.0470716	0	0.0568735	0	0.471041	0	0.736236	0.0302724	0.0275097	0	0.145073	0	0.127469	0	0	0	0.113115	0	0.0642988	0	0	0	0.0886187	0	0	0	0.0312779
AL589986.2	0	0	0	0.038393	0	0.10969	0	0.0437141	0	0	0	0	0	0	0	0	0	0	0	0.0418826	0	0.0411427	0	0.0532943	0	0.052962	0	0.11948	0.196772	0	0	0	0.0920865	0	0	0	0.0414043	0	0	0	0	0	0	0.0371985	0	0	0	0	0
AC105031.3	0	0	0	0	0	0	0	0	0	0	0	0	0	0	0	0	0	0	0	0	0	0	0	0	0	0	0	0	0	0	0	0	0	0	0	0	0	0	0	0	0	0	0	0	0	0	0	0	0
AC011498.3	0	0.0688376	0	0	0	0	0	0	0	0	0	0	0	0	0.0258727	0	0	0	0.0618544	0	0	0	0	0	0	0	0	0	0.0343227	0	0	0	0	0	0	0	0	0	0.0250483	0	0	0	0	0	0.0523302	0	0	0	0
AL161729.3	0.24199	0.0582	0.157292	0.0452958	0.312337	0.194117	0.483679	0.180507	0.0911085	0.321782	0.104885	0.187849	0.167597	0.0806398	0.196871	0.239329	0.0978419	0.0551119	0.209184	0.0494127	0.362943	0.145619	0.176256	0	0.0425917	0.15621	0	0.0469871	0.23215	0.136023	0.370828	0.161044	0.0814822	0.0783834	0.04773	0.020896	0.097697	0.0417188	0.148243	0.172946	0.0963049	0.143931	0.247046	0.175546	0.0442435	0.137943	0.204151	0	0.0234236
AL109954.3	0	0	0	0	0	0	0	0	0	0	0	0	0	0	0	0	0	0	0	0	0	0	0	0	0	0	0	0	0	0	0	0	0	0	0	0	0	0	0	0	0	0	0	0	0	0	0	0	0
AL355607.2	0.0145931	0.0140389	0	0.0655571	0	0	0.033335	0.0124405	0	0	0.0303604	0	0	0.0129679	0.0738717	0.012829	0	0	0.050459	0.0238385	0.0109436	0	0	0	0	0.0301447	0	0	0.0139997	0	0.0298169	0.0194234	0	0.0378151	0.0115134	0.0604862	0	0	0	0	0	0	0	0.0105862	0.0106724	0	0	0	0
AC009446.1	0	0	0	0	0	0	0	0	0	0	0	0	0	0.0200779	0	0	0	0	0	0	0	0	0	0	0	0	0	0	0	0	0	0	0	0	0	0	0	0	0	0	0	0	0	0.0163905	0	0	0.0169434	0	0
AC090150.1	0	0.803459	0.258505	0.338712	0.0479094	0.707171	1.45734	0.177995	0.890916	1.04886	1.61688	1.12376	3.02984	1.79356	0.125825	0.458884	0.50652	0.221908	1.26342	0.39792	0.234866	0.949306	0.283878	0.542508	0.0244993	1.43767	0.347845	0.486497	9.71474	1.74742	0	2.22323	0.406204	1.71331	2.22385	0.264433	18.6854	1.39184	0	1.26009	0.166188	1.19219	0.378945	0.605858	0.0254495	0.539556	8.89862	1.39927	0.350313
TRPM2-AS	0.0177639	0.0341785	0.0395878	0.0332505	0.0244564	0	0.020289	0.0302871	0.0133761	0.00787375	0.024638	0.0165475	0.0210906	0.031571	0	0.00780824	0.0143647	0.0242737	0.35318	0.0217636	0.0133214	0.0712637	0.0724557	0.0276935	0.0187593	0.0091736	0	0.0137968	0	0	0.024197	0	0	0.0230157	0.210225	0.0061357	0.00717169	0.0244998	0.0373101	0	0	0	0.00806003	0.0193296	0.0129912	0.0162016	0.0532843	0.0238095	0.0137557
AC011939.2	0	0	0	0	0	0	0.10865	0	0	0.08433	0.032985	0	0.0376478	0.0422668	0.0343962	0	0	0	0.123348	0	0	0.152651	0	0	0	0	0	0	0	0.0356479	0	0	0	0	0	0	0	0	0	0	0.0757163	0.0905283	0	0.0345042	0	0.086762	0	0	0
DAOA-AS1	0	0	0	0	0	0	0.0124905	0	0	0.007271	0	0	0	0.00728855	0	0	0	0	0	0	0	0	0	0	0	0	0	0	0	0	0	0	0	0	0	0	0	0	0	0	0	0	0	0	0	0	0	0	0
AC008434.1	0.0370809	0	0	0	0.051051	0	0	0	0.083765	0.0328718	0	0	0	0	0.0268152	0	0	0	0.0641078	0	0.0278074	0	0.0432132	0.0385388	0.0783176	0.0382985	0	0.0287999	0.0355731	0.027791	0.0252548	0	0	0.0320292	0.0292553	0	0	0.0511417	0.0519216	0.0706696	0	0	0.0336495	0.0268994	0	0	0	0	0.0287142
AC008555.6	0	0	0	0	0	0	0	0	0	0	0	0	0	0	0	0	0	0	0.0384227	0	0	0	0	0	0	0	0	0	0	0	0	0	0	0	0	0	0	0	0	0	0	0	0	0	0	0	0	0	0
AL080313.1	0	0	0	0	0	0	0.11482	0	0	0	0	0	0	0	0	0	0	0	0	0	0	0	0	0	0	0	0	0	0	0	0	0	0	0	0	0	0	0	0	0	0	0	0	0	0	0	0	0	0
AC097451.1	0	0	0	0	0	0	0	0	0	0	0	0	0	0	0	0	0	0	0	0	0	0	0	0	0	0	0	0	0	0	0	0	0	0	0	0	0	0	0	0	0	0	0	0	0	0	0	0	0
AC114485.1	0	0	0	0	0	0	0.0707797	0	0	0	0	0	0.049051	0	3.51794	0	0	0	2.57134	0	0	0	0.722194	0	0	0	0	0	0	0	0	0	0	0	0.562263	0	0	0	0.108466	0	0	0	0	0	0	0	0	0	0.383905
AP005671.1	0	0.0422987	0	0	0.0908002	0	0	0	0	0	0	0	0	0	0	0	0	0	0	0	0	0	0	0	0	0	0	0	0	0	0	0	0	0	0	0.0303737	0	0	0	0	0	0	0	0	0	0	0	0	0.0340477
AC009087.1	0.0551692	0.159222	0.122947	0.123919	0.037977	0.118013	0.210037	0	0	0.146721	0	0.137044	0.305672	0.0490249	0.0797917	0.0485	0	0.100516	0.19076	0	0.0827441	0.132794	0.385757	0.0573383	0.194202	0	0.183821	0	0	0.0413477	0.112722	0	0	0.0476532	0	0	0.0890922	0.0760888	0.115874	0.210285	0.0878227	0.105003	0.0500639	0.0800423	0.0806935	0.0503173	0.206856	0.0739449	0.0427211
LINC00656	0	0.0103293	0.00797602	0	0.00739109	0	0.0408775	0	0	0	0	0	0	0	0	0	0.0347297	0	0	0	0	0.0172296	0	0.0111592	0	0.0110896	0	0	0	0.00804709	0	0	0	0.0185485	0	0	0	0	0	0	0	0	0	0	0.0157046	0.00979276	0.00805167	0	0
LINC02027	0	4.9618	0	2.76198	0	5.1511	0.156048	5.61983	6.12131	8.65996	4.24001	7.36051	0	5.25101	0.716318	4.7744	2.48586	3.32941	5.58044	8.20209	4.12395	4.0286	4.13977	5.92845	0	8.6432	0.170713	3.44874	0.0655357	8.37103	0.0930528	8.45602	6.74734	5.66465	0	3.63374	0.248217	4.61665	0	3.58031	0	6.24098	0	5.52553	1.47381	7.60128	0.153684	4.44079	0.608345
HOXC13-AS	0	0	0.0107404	0	0.00995277	0	0	0	0	0	0	0	0	0	0	0	0	0	0	0	0	0	0.033699	0	0	0	0	0	0	0.0108361	0.049236	0	0	0	0.0114071	0	0	0	0	0	0	0	0	0.0104885	0	0	0	0	0
AC068580.1	1.69645	0.155431	0.30005	0.423389	0.166827	0.172805	1.35324	0.275468	0.729952	0.286454	0.616243	0.150503	0.639415	0.215359	0.759446	0.568143	0.5226	0.367959	1.11731	0.0659816	0.181741	0.129632	2.73015	0.419798	0.796229	0.333744	0.942081	0.250971	0.0774986	0.242179	0.385135	0.537611	0	0.0697778	0.446143	0.279028	0.456598	0	0.45246	0	0.642988	0.153754	0.146616	0	1.35882	0.0736788	0.848109	0.108276	1.18856
AC021483.1	0.113307	0.0363345	0.140283	0.0565567	0.129995	0	0.0862751	0.0321976	0.0284397	0.0334817	0.0261922	0.0469101	0.538105	0.0335625	0.163876	0.0332031	0	0.0344066	0.163243	0	0.113293	0.0606072	0	0.117762	0.106361	0.0390091	0.125844	0.0880027	0	0.0849199	0.0514466	0.10054	0.0678262	0	0.0297981	0.026091	0.182978	0	0.449522	0	0.0601235	0.0359426	0.171369	0.054797	0.0276214	0.172236	0	0.0506228	0.0292469
L3MBTL4-AS1	0.139434	0	0.110977	0.0894835	0.0685592	0.0958712	0.0530848	0.0254714	0.14999	0.0882907	0.0966957	0.0680357	0.039416	0.159307	0.021607	0.105067	0.0966452	0.0816567	0.0172188	0.0732125	0.044813	0.327632	0.116067	0.0310536	0.0560944	0.0308599	0.182517	0.0850893	0.114655	0.0373221	0.067832	0.0530247	0.116257	0.068822	0.0314308	0.0688015	0.0160837	0.0274724	0.118538	0.0379624	0.0158545	0.0473901	0.0180759	0.0433497	0.109256	0.0454185	0.0746867	0.0533966	0.115686
FTCD-AS1	0	0.0391686	0.0302451	0.121936	0.364351	0	0.124006	0	0.245264	0.180466	0.112941	0.126423	0.0322265	0.0361804	1.32494	0.35793	0	0.185451	0.140781	0	0.0610651	0.0980019	0.189792	0.0423157	0.458628	0.168207	0	0.347845	0	0.33566	0.110919	0.162574	0.0365583	0.035168	0.128489	0.0281261	0.361625	0.168461	0.313554	0	0.324066	0.348715	0.0738943	0.206749	0	0.111402	0.213723	0.109143	0.0945845
THRB-IT1	0.0116063	0	0.034487	0.0260696	0.0639156	0.0496543	0.0972111	0.197885	0	0.0411554	0.0241464	0.0576614	0	0.0515684	0.0251794	0.0510162	0.0375414	0	0.0702298	0	0.0261111	0.0465611	0.0270514	0	0.0163422	0.0359622	0.0580073	0.027043	0.0890747	0.00869857	0.0158094	0.0308958	0.0833713	0.0200502	0.0274706	0	0.0281143	0.0320146	0	0.0221195	0.0184758	0.0552254	0	0	0.016976	0.0105856	0.00870351	0	0.0089875
AP002833.1	0	0	0	0	0	0	0	0	0	0	0	0	0	0	0	0	0	0	0	0	0	0	0	0	0	0	0	0	0	0	0	0	0	0	0	0	0	0	0	0	0	0	0	0	0	0	0	0	0
AC011754.1	0	0	0	0	0	0	0.0947093	0	0	0	0	0	0	0	0	0	0	0	0	0	0	0	0	0	0	0	0	0	0.0397752	0	0	0	0	0	0	0	0	0	0	0	0	0	0	0	0.0303217	0	0	0	0
AC093865.1	0	0	0	0	0	0	0	0	0	0	0	0	0	0.0417787	0.033999	0	0	0	0	0	0	0	0	0	0	0	0	0	0	0	0	0	0	0	0	0	0	0	0	0	0	0	0.0426642	0	0.0343832	0	0	0	0
AL445471.1	0.0993045	0	0	0.0185878	0.0170896	0.026553	0.0189034	0	0.0373878	0.0220081	0	0	0	0	0	0	0	0	0.0643814	0	0	0.0398382	0.0867953	0	0	0	0.0413597	0.0192819	0	0	0	0	0	0	0	0.01715	0	0	0	0	0	0.0236257	0	0	0.018156	0.0452855	0	0	0
LINC00311	0	0.0125059	0.00965679	0.0389324	0	0.0417115	0.00989831	0.0221641	0	0.0460961	0.0180301	0.0484378	0	0.0231037	0.0188015	0.0342845	0	0.0236847	0.0224746	0	0.0194972	0	0	0.0810645	0.0274562	0.0134265	0	0	0.012471	0.0292285	0	0.0519073	0.0350176	0	0.0102562	0.00898022	0	0.017929	0.0091012	0.0743249	0.0206939	0	0.0117967	0.0565816	0	0.0118564	0.00974838	0.0174238	0
AC136285.2	0	0	0	0	0	0	0	0	0	0	0	0	0	0	0	0	0	0	0	0	0	0	0	0	0	0	0	0	0	0	0	0	0	0	0	0	0	0	0	0	0	0	0	0	0	0	0	0	0
AC005586.1	1.94048	0.237591	0.70764	0.475488	0.704318	0.0377356	0.967118	0.150386	0.770435	0.18766	0.269139	0.0876414	0.698148	0.344874	0.459252	0.217115	0.114121	0.160703	1.15894	0.316986	0.343954	0.452926	0.452278	0.256681	0.894205	0.29152	0.352668	0.575449	0.236928	0.555291	1.80219	0.422635	0	0.1219	0.389699	0.170609	1.59532	0.437939	0.938638	0.201721	0.786295	0.268604	0.448233	0.230347	1.36752	0.418322	1.08476	0.236444	0.300528
AL590867.1	0	0.0161587	0	0	0	0	0	0	0	0	0	0	0	0	0	0	0	0	0.0145195	0	0	0	0	0	0	0	0	0	0	0	0	0	0	0	0	0	0	0	0	0	0	0	0	0	0	0	0	0	0
AL138826.1	34.9489	2.34898	100.547	2.22463	24.4021	7.36269	0.604798	5.51732	2.03796	3.88576	0.754841	7.17978	2.21208	10.509	0.127644	8.0948	0.903977	3.34992	1.65295	3.02753	11.8909	5.05116	0.582817	0.733797	2.46463	5.77301	1.4703	3.8157	1.07244	11.0461	2.82507	4.18964	10.6981	1.44839	1.99604	0.182901	10.6891	6.97862	6.69372	4.70953	2.90348	5.34719	0	7.17049	0.0215144	1.63669	0	1.73493	23.8511
AC093157.2	0.121356	0.0583735	0.292985	0.0227154	0.146192	0	0.300313	0.0258636	0.479745	0.134476	0.168317	0.0942047	0.19211	0.0808801	0.131638	0.240042	0	0.193466	0.550744	0.04956	0.386776	0.340791	0.106069	0.189191	0.149515	0.0940055	0.101088	0.117818	0.291053	0.0454763	0.061989	0.121143	0.299658	0	0.574468	0.0838333	0.171479	0.12553	0.0849626	0.0578205	0.0965919	0	0.275314	0.0660259	0.28844	0.0830122	0.20476	0.0406642	0.187947
AL133163.3	0	0	0	0	0	0	0	0.0344335	0	0	0	0.0250839	0	0	0	0.0355089	0	0	0	0	0	0	0	0	0	0	0.0672915	0	0	0	0	0	0	0	0.0318674	0	0	0	0	0	0	0	0	0	0.177237	0	0.333186	0	0
AC099541.1	0	0	0	0	0	0	0.0462709	0	0	0.0269353	0	0	0	0	0	0	0	0	0	0	0	0	0.035409	0	0	0	0	0	0.0291487	0	0	0	0	0	0.0479438	0	0	0	0.0212724	0	0	0	0	0	0	0	0	0	0
LINC01951	0	0	0	0	0	0	0	0	0	0	0	0	0.00837052	0.0093975	0	0	0	0	0	0	0	0	0	0	0	0	0	0	0.0202905	0	0	0	0	0	0	0	0	0	0	0	0	0	0	0	0	0	0.0237911	0	0
AC076968.1	0	0	0	0	0	0	0	0	0	0	0	0	0	0	0	0	0	0	0	0	0	0	0.0553008	0	0	0	0.0790557	0.0368558	0	0	0	0	0	0	0	0	0	0	0	0	0	0	0	0	0	0	0	0	0
AC020571.1	0.12668	0	0.0282312	0	0.0348811	0	0.0482289	0	0.0190778	0	0.0702804	0.015734	0.0300808	0.0337713	0	0	0.0409755	0.0115402	0.076654	0.0310405	0.0664991	0.498039	0.0885777	0.0394981	0.0535113	0	0.168836	0.0590335	0	0.0189885	0.00862779	0	0.079623	0	0	0.00875111	0.0204574	0	0.035476	0	0	0.0361663	0	0.0183793	0.296462	0	0.028499	0.101876	0.0686674
AL022344.2	0.0210304	0.0202317	0	0	0.0144768	0	0	0	0.0158357	0	0.0291685	0	0	0	0	0	0	0	0	0.017177	0.0315419	0	0.0245083	0	0.0148059	0.021721	0	0.0163338	0	0	0.0143232	0	0.0377669	0	0.0165921	0.0145279	0	0	0	0	0	0	0.0190843	0.015256	0	0	0	0	0
LINC01908	0	0	0.0272478	0	0	0	0	0	0	0	0.0254371	0	0	0	0.079576	0	0	0	0	0	0	0	0	0	0	0	0	0	0	0	0	0	0	0	0	0	0	0	0.0513603	0	0.0583902	0	0.0332857	0	0	0	0	0	0
AP001001.1	0.114276	0.109936	0.0242543	0.134452	0.0786644	0	0.124304	0.069585	0.13522	0	0.0452849	0.070967	0.0516865	0.0290139	0.0236112	0.0717582	0	0.0892308	0.0987835	0.0266678	0.0367272	0.0916885	0.171224	0	0.0459731	0.0505836	0.108789	0.038038	0	0.0367056	0.0222372	0.0434573	0.0146585	0.0423032	0.141678	0.067665	0.105453	0.0225155	0.0228588	0.0622255	0.0259876	0.0621429	0.0740721	0.0118427	0.035817	0.0446682	0.0734529	0.0875242	0.0884912
AP001630.1	0	0	0	0	0	0	0.0709417	0	0.0350778	0.0412966	0	0.0578593	0.331852	0	0	0.0409531	0	0	0.0805381	0	0	0.0373768	0.0542885	0	0.0655932	0	0	0	0	0	0	0.0620037	0.0836575	0	0	0	0	0	0	0.0887817	0.0741569	0	0.0845473	0.0337936	0.0340685	0	0.0698671	0	0.0360734
AF123462.1	0	0	0.033907	0	0	0	0	0	0	0	0	0	0	0	0	0	0	0.0831621	0.473477	0	1.77993	0.0366225	0.106386	0	0	0	0	0.070902	0.0437884	0	0	0	0	0	0	0	0	0	0	0	0.0726605	0.0434373	0	0	0	0	0	0	0
MIR4527HG	0	0	0	0	0	0	0	0	0	0	0	0	0	0	0	0	0	0	0	0	0	0	0	0	0	0	0.0728309	0	0	0.0109215	0	0	0	0	0	0	0	0	0	0	0	0	0	0	0	0	0	0	0
LINC01974	0	0	0	0	0	0	0	0	0	0.0365316	0	0	0	0	0	0	0	0	0	0	0	0	0	0	0	0	0	0	0	0	0	0	0	0	0	0	0	0	0	0	0	0	0	0	0	0.0375852	0	0	0
AC006538.3	0	0	0	0	0	0	0.0804538	0	0.0265208	0	0	0	0.0278776	0.0312979	0.0254698	0	0	0	0	0.0287671	0	0	0	0	0	0	0	0	0	0	0	0	0.0316249	0	0	0	0	0.0485757	0.0246583	0	0	0	0	0	0	0	0.0264117	0	0
AP005901.2	0	0	0	0	0	0	0	0	0	0	0	0	0	0	0	0	0	0	0.0335192	0	0.0290786	0	0	0	0	0	0	0	0	0	0	0	0	0	0	0	0	0	0	0	0	0	0	0	0	0	0	0	0
WASIR1	0	0	0	0	0	0	0	0	0	0	0	0	0	0	0.0139673	0	0	0	0	0	0	0	0	0	0	0	0	0	0	0	0	0	0	0	0	0	0	0	0	0	0	0	0	0	0	0	0	0	0
MME-AS1	0.0245863	0	0	0	0	0	0	0	0	0	0	0.0152684	0	0.0655441	0	0	0	0	0.0425062	0.0200814	0.0184375	0	0	0	0	0	0.0819201	0.0190956	0	0	0	0.0327242	0	0	0	0	0	0	0	0.093714	0	0	0.0223111	0.0178355	0	0	0.0184372	0	0
AC098869.2	0.047233	0.159037	0.0701742	0.176822	0.0975418	0.0505184	0.143859	0	0.106698	0.14655	0.0982662	0.073331	0.0747715	0.0629589	0.187862	0.0415232	0	0.215141	0.102074	0.0771572	0.0531309	0.170537	0.0275221	0.14727	0.182892	0.097568	0	0.0550272	0	0.0707995	0.193014	0.125734	0	0.0407982	0.279486	0.0978865	0.0762762	0.0325717	0.132274	0.0450088	0.187973	0.179796	0.128586	0.034264	0.103628	0.129237	0.194809	0.126616	0.0548634
LINC01661	0	0	0	0	0	0	0	0	0	0	0	0	0	0	0	0	0	0	0	0	0	0	0	0	0	0	0	0	0	0	0	0	0	0	0	0	0	0	0	0	0	0	0	0	0	0	0	0	0
AC018645.2	4.22675	1.65969	1.66604	1.55004	1.33603	1.89134	4.3678	1.61779	1.8187	1.52938	2.15353	2.0624	3.14072	1.30311	2.37042	2.38873	2.09261	2.4753	3.20634	1.69092	3.42845	1.62644	3.21682	1.3896	1.36641	2.53914	2.15561	1.60791	2.64809	1.22834	1.76248	1.54996	1.51035	0.856848	1.49723	1.51952	3.587	1.07072	2.02313	1.56177	1.64779	1.43656	0.900196	1.5331	3.0596	2.83226	3.94586	1.44522	2.83887
AC005162.3	0.0248463	0.0159352	0.00922856	0.00930148	0.0370577	0	0.2018	0.0105906	0.0124727	0.018355	0.00574352	0.00257166	0.00983315	0.00735972	0	0.0291237	0.0133945	0.0037724	0.0143186	0.00676459	0.0186326	0.0132902	0	0.00860774	0.0029154	0.00855407	0.0275955	0.0225138	0.023836	0.00620719	0.00846106	0.0220469	0.0037183	0.0035769	0.218897	0.00572133	0.00668735	0.0228452	0.0057984	0.0078921	0.00659206	0.0197041	0.0075157	0.0150201	0.0272562	0.0264381	0.00931609	0	0.0160334
TPM1-AS	0.109253	0.0350345	0.0946849	0.0227222	0.0501377	0.0259671	0.157134	0.0310456	0.105118	0.0215225	0.0420917	0.0339238	0.187363	0.0161808	0.0658388	0.0586945	0.0294488	0.0331756	0.0419739	0.00991495	0.0455166	0.0438291	0.0212201	0.0189247	0.0256388	0.0438823	0.161789	0.00471412	0.0407595	0.0181959	0.0165353	0.0242358	0.0217998	0.0104854	0.0335206	0.050315	0.0245043	0.0167423	0.0169976	0.0115676	0.00966207	0.00577611	0.0660951	0.00880608	0.128727	0.027679	0.00910314	0.00813526	0.00470008
ABCC5-AS1	0.086812	0	0	0	0	0	0	0	0.0326844	0	0	0	0	0	0	0	0	0	0	0.0709056	0	0	0	0	0	0.0448313	0.0723133	0	0	0	0	0	0	0	0	0	0	0	0	0	0	0	0	0	0	0	0	0	0
AL513523.3	0	0	0.0478561	0	0	0	0	0.0549193	0	0	0	0	0	0	0	0	0	0	0	0	0	0	0	0	0	0	0	0	0	0	0	0	0	0	0	0	0	0	0	0	0	0	0	0	0.0471138	0.0587565	0	0	0
LINC02073	0.00653529	0.0440097	0.019419	0.0195724	0.116967	0.0768885	0.204023	0.122568	0.00984206	0.0231738	0.036257	0.27192	0.325886	0.0464595	0.0378082	0.0287263	0.0105694	0.0297675	0.0282465	0.0693919	0.00490089	0.0471919	0.0304643	0.0339612	0.013803	0.0134998	0.871009	0.172578	0.0752346	0.0881641	0.008902	0.0956828	0.0410768	0.0338697	0.0876532	0.0135439	0.749318	0.225335	0.334007	0.174371	0.0104034	0.0870699	1.7495	0.137485	0.0573532	0.0357632	0.00980158	0.00875944	0.0151821
LINC00278	0	0	0	0	0.488212	0.0561895	0.360018	0.134357	0.29669	0.163002	0	0	0.124748	0.256764	0	0	0	0	0.0454131	0	0.157587	0.295059	0	0	0	0	0.918985	0.632446	0	0.177181	0	0	0.212274	0.158823	0.10362	0.0907292	0.487823	0.326053	0.331025	0.250307	0	0	0	0	0	0	0.0787921	0.176037	0.183067
AP005131.4	0.0119891	0.0115337	0	0	0	0	0.00912883	0	0	0	0	0	0.00948955	0.0106538	0	0	0	0.0218435	0.0207274	0	0	0.00961934	0.0139718	0	0	0.0123827	0	0.00931163	0	0.00898544	0	0	0	0	0.0189177	0	0	0	0	0	0	0	0	0.00869717	0	0	0.00899055	0	0.00928391
AC005225.3	0	0	0	0	0.0810029	0	0.119466	0	0.118143	0	0.0272015	0	0	0.0348558	0.0567305	0.103448	0	0.0357324	0.0678134	0	0.117659	0.0629428	0.0457111	0	0	0	0	0.0609293	0	0	0.0267146	0	0.0704399	0.0338806	0	0.0270964	0.063343	0.108196	0	0	0	0	0.106784	0	0.0286858	0.0715494	0.0294142	0	0
AC018809.1	0.40494	0	0.082039	0.0826873	0.101363	0	0.224242	0	0.138599	0	0	0.0685837	0.466206	0	0.612289	0	0	0	0.604618	0.0601352	0.193244	0.118146	0.471907	0.11478	0.181419	0.0380215	0	0.114366	0.176579	0.0551801	0.0752163	0	0.132218	0	0.0580874	0	0.0594485	0	0.051546	0	0.175804	0	0	0.0534097	0	0.0671503	0.0276057	0.0493412	0.057013
LINC02296	0	0	0	0	0	0	0	0	0	0	0	0	0	0	0.0270617	0	0	0	0	0	0	0	0	0	0	0	0	0	0	0	0	0	0	0	0	0	0	0	0	0	0.476567	0	0	0	0	0	0	0	0
AC010768.4	0	0.0376621	0	0	0	0	0	0	0	0	0	0	0	0	0	0	0	0	0	0	0	0	0	0	0	0	0	0	0	0	0	0	0	0	0	0	0	0	0	0	0	0	0	0	0	0	0	0	0
IFT74-AS1	0	0	0	0.0376346	0.0692025	0.107523	0	0.171402	0	0.0891191	0	0.0312155	0.198929	0.0446671	0.0363495	0	0	0	0.130352	0.0821105	0	0.04033	0.0585779	0.0522415	0	0.0519158	0	0	0.0964427	0.0753446	0.0342342	0	0.0451337	0	0.118972	0	0.0811729	0	0	0	0	0	0.0456138	0	0	0	0.150775	0.067372	0
SFTPD-AS1	0	0.00391608	0.0060478	0.00914338	0.00280214	0	0.00619906	0	0.00306519	0.00721721	0.00282295	0.00252795	0.00322201	0.0144693	0.00294372	0.00357858	0	0.0111249	0.0281505	0	0	0.00326608	0.00474386	0.00423072	0.00286585	0.00840868	0	0	0.00390515	0.00305085	0.00277242	0	0	0	0.00963477	0.00281204	0.00657369	0.0112285	0	0	0.00648002	0.00774767	0	0.00885891	0.00297699	0.00742534	0	0	0
AC092468.1	0	0	0	0	0	0	0	0	0	0	0	0	0	0.0321889	0	0	0	0	0	0	0	0	0	0	0	0	0	0	0	0	0	0	0	0	0	0	0	0	0	0	0	0	0	0	0	0	0	0	0
ST3GAL5-AS1	0.0259993	0.0750357	0.0772543	0.0583985	0.107383	0	0.0593899	0.0221641	0.0391545	0.0230481	0.144241	0.0161459	0.452735	0.0462074	0.13161	0	0	0.0236847	0.0898982	0.0849419	0.0974858	0.0834414	0.151495	0.0270215	0.0183041	0.080559	0.0866281	0.100965	0.0498841	0.155885	0	0.13842	0	0.0673717	0.123074	0.0179605	0.20993	0.143432	0.145619	0.0990998	0.0827754	0.0742263	0.0471867	0.0943027	0.152112	0.0948509	0.175471	0.13939	0.0402659
AL928970.1	0	0	0	0.00521451	0	0	0.00530303	0.00593722	0	0	0.00965965	0	0.0220503	0	0	0	0	0	0.00602038	0	0	0	0	0	0	0	0	0	0	0	0	0	0	0	0	0	0	0	0.00487598	0	0	0	0.00632008	0	0	0	0.0104454	0.0186696	0
AC027449.1	0.100036	0.240593	0.0743122	0.149799	0.137725	0	0.190427	0.17056	0	0.0443406	0.0346869	0.0621242	0.0395903	0.0888953	0	0.0439717	0.242681	0.136696	0.0432373	0.12256	0.150037	1.28422	0.0582901	0.0519848	0	0.0516607	0.166658	0.077696	0.143953	0.224923	0	0.133148	0	0.129612	0.0394623	0.24187	0.121161	0.0689847	0.0350184	0.190652	0.0796231	0.0951993	0.136169	0.181423	0.0365797	0.0456193	0.0375085	0.134082	0.0774648
AC087878.1	0.0354659	0.136476	0.0263459	0.026554	0	0	0.189034	0	0.0267056	0	0	0	0	0	0	0.0311786	0	0	0.0613156	0	0	0.0569117	0.0826622	0.0368603	0	0	0	0	0.0340238	0	0	0	0	0	0	0	0	0	0	0	0.0564575	0	0	0	0.0778116	0	0	0	0
LINC00470	0.00501044	0.0723024	0.692294	0.00750284	0	0.0428716	0.118268	0.0469848	0.00377283	0.0932757	0.031272	0.0435618	0.995429	0.12912	2.17037	0.0308332	0.0486199	0	1.86241	0.00818478	0.0150296	0.0723617	0.0233562	0.0312446	0	0.0362248	0	0.0428064	0.100941	0.0713484	0.0102374	0.053351	0.0224947	0	0	0.0553799	0.0445023	0.0552828	0.224504	0.162333	0.015952	0.057218	0	0.0945023	0	0.022849	0.0300585	0.0201469	0.139677
AP000350.6	0.119176	0.0277939	0.0992609	0.0459667	0	0	0.0687456	0.0184721	0.0571064	0.0320146	0	0	0.205811	0.279199	0.216762	0.0222238	0	0	0.078045	0.0442453	0	0	0.0420863	0.0525474	0.0508502	0.0111899	0	0	0	0	0.0418135	0.0144202	0.0129708	0.015597	0.119668	0.0199582	0.0670681	0.0448272	0.1871	0.0757093	0.235705	0.0687353	0.249067	0.0890731	0.0343344	0.0230565	0.0893697	0.00968092	0.0167792
LINC01185	0	0.0096522	0	0	0	0	0.0076396	0	0	0	0	0	0.00794148	0	0	0	0	0	0.00867303	0.00819486	0	0	0.023385	0	0.00706364	0	0.0167151	0	0.0192505	0	0	0.0133542	0	0.00866635	0.0712422	0	0	0	0.00702438	0	0	0.0190962	0.0182095	0	0.00733758	0	0.00752388	0	0.00776939
AC015689.1	0.132191	0.339122	0.0981983	0.164957	0.0606645	0.235643	0	0.676149	0.165898	0.39062	1.37509	4.76137	0.383649	0	0.446108	0	0.498845	0.200705	0.15236	0.21594	2.87482	0.0353542	4.98103	0.457962	0.124088	0.273064	0.513862	0.855581	0.169088	0.198147	0.0300105	0.175946	0.633045	0.0380606	0.417173	0.182637	0.213474	0.425406	0.277646	2.85523	0.0701441	0.41933	2.19924	0.767158	0.032225	0.241131	0.264346	0.11812	0.614185
AC010536.3	0.038194	0	0.0851174	0	0	0	0.0290821	0	0.0287599	0	0	0	0	0	0	0.0335769	0	0	0	0	0.0286422	0	0.0445104	0	0.0268895	0	0.0636302	0.0593289	0.0732819	0.0286253	0.0260129	0	0.102885	0	0	0	0.0308396	0	0	0	0	0	0.0346596	0.0277069	0.0279324	0.034835	0	0.0511926	0
AC010422.4	0.152776	0.0367435	0	0.08579	0.131459	0.0817014	0.639806	0.03256	0.0287599	0.0677172	0.052974	0	0.393006	0.101821	0.0828606	0	0.185312	0.0695878	0.198097	0.0935875	0.0286422	0	0.445104	0.0396957	0.0268895	0.118345	0.12726	0.0296644	0.036641	0	0.286142	0.101672	0.0685897	0.0659813	0	0	0.0616792	0	0.10696	0	0.121601	0	0	0.0831208	0.111729	0	0.0286416	0.0511926	0.118305
AC002368.1	0	0	0	0	0	0	0	0	0	0	0	0	0	0	0	0	0	0	0.0907092	0	0	0	0	0	0	0	0	0	0	0	0	0	0	0	0	0	0	0	0	0	0	0	0	0	0	0	0	0	0
AL031283.3	0.112008	0	0	0	0.0192758	0.0299497	0	0	0	0	0.0388379	0.0173896	0.022164	0	0.0404995	0.0246169	0	0	0.0484115	0.0228712	0.062997	0.0449344	0.0326328	0	0.0394281	0	0	0	0	0	0.0381427	0	0	0.0241871	0.0220924	0	0	0	0	0	0	0	0	0.0203133	0	0	0	0	0.0433675
TMC3-AS1	0	0.783953	0.0672611	0.395456	0.37397	0.290528	0.425151	0.347347	0.215901	0.401333	0.397678	0.637268	2.56809	0.482763	0.207346	0.0795989	0.390497	0.632377	0.456572	0.493028	0.837439	0.193727	0.386901	0.42347	0.084994	0.67021	0.402253	0.421943	0.289542	0.588124	0.133612	0.9842	0.284553	0.286767	0.261931	0.489965	0.926057	0.312195	0.412043	0.575205	0.192181	0.876024	0.397134	0.47073	0.132435	1.19743	0.418711	0.465212	0.268772
Z97652.1	0.0618767	0	0	0	0	0	0	0	0.0465927	0	0	0	0	0	0	0	0	0	0.0534881	0	0	0	0	0	0	0	0	0	0	0	0.0421424	0	0	0	0	0	0	0	0	0	0	0	0	0	0	0	0	0	0
PISRT1	0	0	0	0	0	0	0	0	0	0	0	0	0	0.0340681	0	0	0	0	0	0	0	0	0	0	0	0	0	0	0	0	0	0	0	0	0	0	0	0	0	0	0	0	0	0	0	0	0	0	0.0296875
AC027807.2	7.43445	0.192003	0.22239	0.224147	0.412162	0	0.873817	0.085071	0	0.0884639	0.138408	0.278874	0.11848	0.35471	0.360823	0.043864	0.806956	0.227269	0.603838	0.48904	0.374174	0.240201	0.697767	0.103715	0.281022	0.25767	0	0.116258	0.191467	0.112186	0.101948	0	0.448019	0.172392	0.590484	0.137873	0	0.275262	2.06102	0.0950921	0.317712	0	0.135835	0.144782	0	0.136523	0.187083	0.0668766	1.39095
AL159169.3	0.0362877	0	0	0.0271694	0	0	0.0552612	0	0	0.0321687	0	0.0225352	0.0287224	0.0322463	0	0.0319011	0	0	0	0	0.0544253	0.0582305	0.0422889	0.0377145	0.0255474	0	0	0.0281839	0	0.0271966	0	0	0.0651664	0	0	0.0250678	0.0293004	0	0	0.0691579	0	0	0.0329297	0	0.0530765	0	0	0	0.0281
AC005165.1	0	0	0.00509519	0	0.0188861	0	0.0104453	0.0058472	0.0103295	0.0060804	0.00951319	0	0.010858	0.0182852	0	0	0.0221858	0.0124967	0.0177873	0.00560221	0.00514363	0.0110065	0.0239798	0	0	0	0.159976	0.0053272	0.434284	0.00514059	0.0140144	0.0273878	0.024635	0	0	0.00473822	0.044306	0	0.0192082	0.0261439	0.0109187	0	0	0	0.0802585	0.00625575	0.709805	0.00919329	0.0106227
MRVI1-AS1	0	0	0.0215574	0.0108639	0.00998824	0.0155192	0.0110483	0	0.142036	0.0128629	0	0.0180218	0.0114849	0	0	0	0.0469334	0	0	0.0237026	0	0.0582097	0.033819	0.0150804	0	0.0149864	0.0483463	0	0	0.0108748	0	0.0386253	0.0130286	0	0	0.0100235	0.140592	0	0.0203171	0	0	0.0276166	0.0131672	0	0.063669	0.0132338	0.0761666	0	0
AC090993.1	0	0	0	0	0	0	0	0	0	0	0	0	0.027686	0	0.0758844	0	0	0	0	0	0	0	0	0	0	0	0	0	0	0	0	0	0.0942225	0	0	0	0.0282432	0	0	0	0	0	0	0	0	0	0	0	0.0270861
AL513188.1	0.0331554	0	0.0246295	0	0	0	0.0252455	0	0	0	0	0	0	0	0	0	0	0	0.0286605	0	0	0	0	0	0	0	0	0	0	0	0	0	0	0	0	0	0	0	0	0	0	0	0	0	0	0	0	0	0
AC012229.1	0.0407964	0	0	0	0	0	0	0	0	0	0	0	0	0	0	0	0	0	0	0	0	0	0	0	0	0	0	0	0	0	0	0	0	0	0	0	0	0	0	0	0	0	0	0	0	0	0	0	0
AC245052.7	0	0	0	0	0.0780696	0	0	0	0	0	0	0	0.0448837	0.0503905	0.984172	0.049851	0	0	0.147055	0	0	0	0	0	0.0798447	0	0	0	0.1088	0	0	0	0	0	0	0	0	0	0.079401	0	0	0	0	0	0	0	0	0	0
AC092535.4	0.410225	0.838623	8.79926	1.57411	1.69433	0.548449	9.80023	0.611997	1.31281	1.04552	0.889016	0.605046	1.01469	0.729075	0.852887	2.25397	0.995178	2.00867	7.35818	0.753886	1.11517	1.68685	17.9873	5.38272	6.53429	1.5359	0.42714	0.677052	2.06611	0.461177	0.733406	0.887262	0.874822	0.265753	1.53734	0.921005	1.11792	0.990113	1.86682	0.390908	2.20397	0.829577	0.232665	0.520779	2.17507	0.467684	1.46123	1.03094	6.19445
AL008635.1	0.370135	0.101737	0.471352	0.158359	0.109196	0	0.161047	0.0450766	0.0398156	0.0937487	0.183345	0.197022	0.0418526	0.093975	0.152951	0.185938	0	0.0963384	0.22854	0.129564	0.872359	0.0848501	0.431347	0	0.186131	0.109225	0.176181	0.164272	0.304358	0.158517	0.108038	0.351891	0.28487	0.137018	0	0.109582	0.256169	0.21878	0.0740388	0.100773	0.168346	0.100639	0.0479833	0.115074	0.11601	0.192905	0.0396518	0.212616	0.0818913
AC011373.1	0	0	0	0	0	0	0	0	0	0	0	0	0	0	0	0	0	0	0	0	0	0	0	0	0	0	0	0	0	0	0	0	0	0	0	0	0	0	0	0	0	0	0	0	0	0	0	0.115129	0
AC002306.1	0.0217262	0	0	0	0	0	0.016543	0	0	0.01926	0	0	0	0.0193065	0	0	0	0	0.0375615	0	0	0.0174319	0	0	0.0305915	0	0	0	0	0	0	0	0	0	0	0.0150086	0	0	0	0	0	0.0206756	0	0	0.0158889	0.0198154	0.0651695	0	0
AC012676.3	0.1275	0	0.0631421	0.0318205	0	0	0.129443	0.0362307	0.0320021	0.0753513	0.029473	0.0527861	0.201836	0	0.184404	0.448346	0.0687344	0.0387164	0.440858	0.0347127	0.159356	0.0340995	0	0	0	0	0.141607	0.0660173	0.0407717	0.0637047	0.0868363	0.0565671	0.0763222	0.0734197	0	0	0.0686326	0	0.0297546	0	0	0	0.038567	0.0616609	0.0932439	0	0.0318705	0	0.0658208
AC027117.2	6.38664	9.10094	14.5888	16.9754	0.989188	7.81282	5.89637	8.03071	6.04143	9.16486	16.6089	14.0552	2.27481	15.6072	9.87211	14.5628	8.19867	14.7997	9.10933	14.117	1.82597	9.86424	16.0486	5.39317	3.7938	10.5542	14.763	16.1832	1.26368	4.45752	5.21971	3.82526	0.788513	23.7212	23.4934	17.4547	13.0533	2.58747	7.4057	7.75952	0.82605	1.59543	0.579563	22.7019	19.2668	40.1558	6.70505	22.6311	6.30563
LINC00626	0.0213167	0	0	0	0	0	0	0.0181722	0	0	0.0147828	0	0	0	0	0	0	0	0	0	0	0	0	0	0	0	0.035513	0	0	0	0	0	0.038281	0	0	0	0.0172121	0.0293998	0	0	0	0	0	0	0.109126	0	0	0	0
AL031599.1	0.0503897	0	0	0	0	0	0.364498	0	0.0189715	0	0	0	0	0	0	0.0442982	0	0	0.0435584	0	0	0	0.0293615	0	0	0	0.125922	0	0	0	0.0171595	0	0	0	0.059633	0	0	0	0	0	0	0	0	0.018277	0	0.022979	0.0944676	0	0.03902
AC074389.3	0	0	0	0	0	0	0	0	0	0	0	0	0	0	0	0	0	0	0	0	0	0	0.0522556	0	0	0.0463125	0	0	0	0	0	0	0	0	0	0	0	0.0618431	0	0	0	0	0	0	0	0	0	0	0
TUBA3FP	0.0338585	0.0732885	0.0503036	0.0633764	0.0874023	0.0995874	0.0837879	0.115456	0.101981	0.0825417	0.064571	0.0735932	0.0803988	0.105307	0.0979397	0.0297655	0.0273795	0.0308443	0.0512196	0.0898777	0.069825	0.0950815	0.0394579	0.0703795	0.059593	0.0874258	0.0423055	0.131486	0.146168	0.0697838	0.0807102	0.090131	0.0532034	0.065803	0.0333912	0.0409319	0.0410083	0.0583717	0.094819	0.0322641	0.040424	0.104719	0.11522	0.116669	0.0495233	0.0617616	0.101561	0.0907632	0.0262188
AC005871.1	0	0	0	0	0	0	0	0	0	0	0	0	0	0	0	0	0	0	0	0	0	0	0	0	0	0	0	0	0	0	0	0	0	0	0	0	0	0	0	0	0	0	0	0	0	0	0	0	0
AL356740.3	0	0.0301761	0	0	0	0	0.0238841	0	0	0.0278068	0.0435056	0	0	0	0.0226835	0.0275755	0.05073	0	0	0	0.0235228	0	0	0	0	0	0	0.0243623	0	0	0.0213634	0	0	0	0	0	0	0	0.0439213	0	0	0	0	0	0	0	0	0	0
PCAT18	0	0.0527676	0.0465667	0.0234673	0.0215758	0.00838084	0.0775635	0.0467596	0.00590031	0.0416781	0.0380381	0.0243308	0.0186065	0.11141	0.0056665	0.151548	0.0633637	0.0571059	0.0541881	0.0384004	0.0587617	0.037722	0	0.00814389	0.0055166	0.00809311	0	0.0426012	0	0.0880906	0	0.0938647	0	0.0135366	0	0.00541302	0	0.129685	0.00548594	0.0597345	0.112263	0.0745691	0	0.0397901	0.0114611	0.0714668	0.135149	0.126031	0
AC092718.5	0.102989	0.0330258	0.0765052	0.0771097	0.0472631	0.14687	0.365954	0.0292656	0.0516998	0.0304328	0	0.0852767	0.10869	0.122025	0.173779	0.0603592	0	0.0312734	0	0.0280394	0.0257442	0.110176	0.0800137	0.107038	0.0725065	0.0354568	0.343153	0.239967	0	0.025729	0.0701427	0.0913849	0	0.0889579	0.0541692	0.166005	0.0831577	0.142041	0.0480691	0	0.218594	0.0326696	0.218069	0.0747106	0.276168	0.0939312	0.0514872	0.184052	0.0265836
AL359397.1	0	0.0390904	0.0301847	0	0.0559421	0	0.0928189	0	0.0305968	0	0	0.0252341	0.0321622	0	0	0	0	0	0.0702498	0	0.152358	0	0.0473534	0	0	0	0.338472	0	0.0389813	0.0304537	0	0	0	0	0	0	0	0.112083	0	0	0	0.0386688	0	0	0.0594329	0.03706	0.152355	0	0.0314652
AC026780.1	0	0	0	0	0	0	0	0	0	0	0	0	0	0	0	0	0	0.0135862	0	0	0	0.0239321	0	0	0	0	0	0	0	0	0	0	0	0	0	0	0	0	0	0	0	0	0	0	0	0	0.0111839	0	0
JADRR	0	0	0	0	0	0	0	0	0	0	0	0	0	0	0	0	0	0	0.0102252	0	0	0	0	0	0	0	0	0	0	0	0	0	0.0106212	0	0	0	0	0	0.016563	0	0	0	0	0	0	0	0	0	0
AL021707.4	0.148957	0	0.0368842	0.0371757	0.0341793	0	0.378067	0	0.112163	0	0	0	0.117902	0	0.179531	0	0	0.045232	0.171684	0	0.0744697	0.119514	0.0578636	0	0.104869	0.0512827	0	0.0771275	0	0.0744258	0	0	0.0891667	0	0.0783471	0	0.120274	0.0684799	0.139049	0	0.0790404	0	0.0450575	0	0.0726241	0.0452855	0.0744681	0.133101	0.038449
AC079148.1	0.497129	0.1913	0.184646	0.148884	0.188216	0.372195	0.113559	0	0.0748669	0.0881398	0.103425	0.293288	0.27544	0.508027	0.0719002	0.327775	0.5628	0.384942	0.279327	0.0812082	0.223682	0.358981	0.115868	0.129169	0.279993	0.102691	0.12423	0.154443	0.476914	0.167662	0.220077	0.0661676	0.178551	0.0644103	0.549099	0.274736	0.421475	0.0342818	0.0870115	0.0473719	0.158274	0.0709636	0.112781	0.0540945	0.163604	0.0906817	0.242317	0.233211	0.173232
LINC02019	0.0889402	0.0190139	0.0954334	0.0369952	0.0476187	0.0634177	0.0752464	0.0421226	0.0669714	0.113886	0.0959447	0.0368221	0.0469318	0.0263449	0.0214392	0.156377	0.223754	0.0270075	0.367328	0.0242146	0.0222325	0.158579	0.241847	0.0718955	0.0139147	0.0102067	0.0987813	0.145831	0.113765	0.0370322	0.0403831	0.0131532	0.0266201	0.0256078	0.194917	0.0887473	0.0159588	0.0136295	0.0138374	0.131836	0.0471941	0.0846396	0.0717421	0.043013	0.20236	0.0180263	0.022232	0.0529819	0.0153049
AL354696.2	0.0819962	0.0430267	0.0664483	0.0167433	0.0615752	0.0398635	0.1646	0.0381278	0.202067	0.0132161	0.0775407	0.0740667	0.194704	0.0993602	0.226403	0.0917433	0.0361667	0.0067906	0.0515491	0.0426187	0.13975	0.119617	0.0781826	0.0852201	0.0944629	0.0461938	0.0869295	0.0578951	0	0.0446936	0.0203074	0.059529	0.0602389	0.0837028	0.129383	0.0772411	0.252792	0.0719654	0.093938	0	0.059331	0.028375	0.121759	0.081112	0.0599661	0.074785	0.234775	0.0299733	0.0923564
AC024941.1	0	0	0	0	0	0	0	0	0	0	0	0	0	0	0	0	0	0	0	0	0	0	0	0	0	0	0	0	0	0	0	0	0	0	0	0	0.0984282	0	0.0426721	0	0	0	0	0	0	0	0	0	0
AC007114.1	3.64291	0.687169	1.14967	0.552635	2.72075	1.1205	2.7013	0.669823	2.70723	1.98407	1.66769	1.56735	6.76568	0.930957	2.82379	1.06751	1.5788	1.12789	2.88147	1.49744	3.55321	1.47098	3.77365	1.21255	1.08958	1.27877	2.69733	0.980106	2.76384	1.99861	1.47568	1.86976	1.09034	0.987173	2.29177	0.509888	0.961258	0.820958	0.7668	1.13443	0.985463	1.40483	2.44154	1.27815	1.48009	1.08579	3.35673	0.989305	2.56282
AC018946.1	0	0	0	0	0	0	0	0	0	0	0	0	0	0	0	0.0390753	0	0	0.0384227	0	0	0	0	0	0.0312928	0	0	0	0	0	0	0	0	0	0	0	0	0	0	0	0	0	0	0	0	0	0	0	0
AC092666.1	0.0147518	0	0	0	0	0	0.0112324	0	0	0	0	0	0	0	0	0	0	0.0134385	0.0127519	0	0	0	0	0	0.0103856	0	0.024576	0	0	0	0.010047	0	0	0	0	0	0	0.0203455	0	0	0	0	0	0	0	0	0.0110623	0	0.0114232
LINC01020	0	0	0	0	0	0	0	0	0	0.00871818	0	0	0	0	0	0	0	0	0	0	0	0	0	0	0	0	0	0	0	0	0	0	0	0	0	0	0.00794083	0	0	0	0	0	0	0	0	0	0	0	0
LINC01851	0	0	0	0	0	0	0	0	0	0.0283307	0	0	0	0	0.0231108	0	0	0	0	0	0.0239659	0	0	0	0	0	0	0	0	0	0	0	0	0	0	0	0.0258046	0	0	0	0	0	0	0	0	0	0	0	0
LINC00500	0	0	0	0	0	0	0	0	0	0	0	0	0	0	0	0	0	0	0	0	0	0	0	0	0	0	0	0	0	0	0	0	0	0	0	0	0	0	0	0	0	0	0	0	0	0	0	0	0
AC011228.1	0.0268922	0	0	0	0	0	0	0	0	0	0	0	0	0	0	0	0	0	0	0	0	0	0	0	0	0	0	0	0	0	0	0	0	0	0	0	0	0	0	0	0	0	0	0	0	0	0	0	0
AC061975.1	0	0.00715801	0.00552724	0	0	0	0	0	0.0112054	0.00659599	0	0	0.0942296	0.00661191	0	0	0	0	0.0257275	0.0121545	0.0390585	0.0059699	0	0	0.0209534	0.0153698	0.0371874	0	0.0428282	0	0.00506757	0	0	0	0.0645734	0.02056	0.00600786	0	0	0	0	0	0	0	0	0	0	0	0
LINC02569	0.143531	0.0230133	0.0177703	0.0358214	0.0329342	0	0.34608	0.0407861	0.0900646	0.0848255	0.082947	0.10399	0.416559	0.106288	0.363282	0.0841198	0	0	0.0206787	0.0390773	0.251149	0.0383869	0.0557557	0.0248623	0.202098	0.0494146	0.039853	0.0928974	0	0.0717146	0.179217	0.127359	0.150357	0.0413255	0.358592	0.0991518	0.135209	0.098978	0.40195	0	0.228484	0.0910602	0.325621	0.121474	0.0349893	0.218179	0.430532	0.160315	0
AC008534.1	0	0	0.00779512	0.00785671	0	0	0	0	0	0	0	0	0	0.00932484	0	0	0	0	0	0	0	0	0	0	0.0221631	0	0	0	0	0	0	0	0	0	0	0	0	0	0	0	0	0	0	0	0	0.00957065	0	0	0
CASC9	0.0276408	0	0.0513324	0.0206952	6.05064	0.0443451	4.24087	0.129599	3.86087	0.0490065	0.201269	1.25307	0.536015	0.0736871	3.63792	0	0	0	7.5623	0.790167	5.24422	0.0776209	4.78347	0	0	0.54242	0	0.128808	1.14022	0.010358	0.216491	0	0	0.107438	9.22453	0.0381888	0	0.0190609	0.561197	0.31607	4.77409	0.0263042	0	0.0200513	0	0	0	0	3.54237
AC096564.2	0.00646884	0.0435622	0.0240269	0.00484335	0.00445297	0	0.00985113	0	0.00974198	0.0458764	0.0179442	0.016069	0.0153606	0.0114968	0.0327458	0.0284342	0	0	0	0.00528356	0.0339574	0.0155707	0.0226159	0.00672317	0.00910843	0.0133625	0.0107769	0.0301452	0.0062058	0.0096964	0	0.00860998	0	0.00558755	0.00510364	0	0.0104465	0	0.0226445	0.0123284	0.0102976	0.0123121	0.0234809	0.00469266	0.00473084	0.0471994	0.0145529	0.0173408	0
AC016687.2	0	0	0	0	0	0	0	0	0	0	0	0	0	0	0	0	0	0	0.0145796	0	0	0	0	0	0	0	0	0	0	0	0.011487	0	0	0	0	0	0	0	0	0	0	0	0	0	0	0	0	0	0
AC063944.3	0.0763881	0	0	0.0285967	0.0525835	0.0408507	0	0	0.0287599	0.0338586	0.052974	0	0.0302313	0.0678806	0	0.100731	0	0	0.0330161	0	0	0.0919342	0.0445104	0	0	0.0394482	0	0	0	0	0.0260129	0	0	0	0	0.0263847	0	0	0	0.072791	0	0	0	0.0554139	0.0279324	0.034835	0	0	0.0295761
AC046143.1	0.523596	0.282078	0.093349	0.235216	0.346012	0.156804	0.191367	0.249962	0.346953	0.389896	0.319534	0.104052	0.0828871	0.223336	0.0302913	0.110472	0.508083	0.343429	0.470717	0.239489	0.188473	0.20165	0.366112	0.195906	0.20643	0.151421	0.697838	0.211466	0.221014	0.0941808	0.213964	0.334514	0.225669	0.271358	0.0495715	0.15915	0.253665	0.115542	0.293261	0.0399152	0.0666802	0.219242	0.0950287	0.121546	0.153168	0.152815	0.125646	0.224573	0.259491
AC005379.1	0	0	0	0	0.0427241	0	0	0	0	0	0	0	0	0	0	0	0	0	0	0	0	0.0497977	0	0	0	0	0	0	0	0	0.0422709	0	0	0	0	0	0	0	0	0	0	0	0	0	0	0	0	0	0
FAM106A	0.00264279	0.00508485	0.0569328	0.0336381	0.0600345	0	0.0020123	0	0.258701	0.0515417	0	0	0	0	0	0.0325264	0	0.00963009	0.0182761	0.00431712	0.00198186	0.00424085	0.0677566	0.0164802	0.130241	0.0136479	0.0352226	0.0225786	0.00253533	0.0277297	0.00539979	0.00351754	0.016611	0.009131	0.00208505	0	0.00213391	0.0109347	0.0259035	0.0151101	0.00841402	0.047785	0	0.00191715	0.0193275	0.0337452	0.00594546	0.0141689	0
AC128709.3	0	0	0	0	0	0	0	0	0	0	0	0	0	0	0.0235169	0	0	0	0	0	0	0	0	0	0	0	0	0.0252574	0	0	0	0	0	0	0	0	0	0.0448511	0	0	0	0	0	0	0	0	0.292638	0.0435873	0
AC084819.1	0	0	0	0	0	0	0	0	0	0	0	0	0	0	0	0	0	0	0	0	0	0	0.055953	0.0499005	0	0	0	0	0	0	0	0	0	0	0	0	0	0	0	0	0	0	0	0.0348297	0.0351131	0	0	0	0
LINC01963	0.594944	0.230184	0.475582	0.15978	1.41559	0.248997	0.625348	0.126796	0.95928	0.160516	0.255623	0.136543	0.230336	0.643615	0.846443	0.324047	0.345135	0.129604	0.503107	0.295786	0.577093	0.570744	1.3113	0.396541	0.455277	0.173657	0.657182	0.220994	1.35243	0.213253	0.880868	0.258217	0.191618	0.100544	0.239795	0.209963	5.80117	0.561892	0.670066	0.295788	0.30883	0.13539	0.727676	0.286161	0.766152	0.530825	0.32976	0.312034	0.931423
MEG8	0	0.0393523	0.0202579	0	0.00469307	0.00729184	0.00519115	0.0348717	0.00513362	0.0302187	0.0141838	0.00846769	0	0	0.0049302	0.0299673	0.0110261	0.0310535	0	0.0222738	0	0.0109402	0	0.0141713	0.00479977	0.00704149	0	0.0105902	0	0	0	0	0.0183649	0.00588882	0	0.00470966	0	0	0.0095462	0.0129932	0.0108528	0	0	0.00989136	0.00498592	0.00621804	0.00511251	0.00913787	0.00527933
AL158166.1	0.109744	0	0.122285	0.0821672	0.113317	0.0586885	0.083562	0.18711	0	0	0.0761055	0.0340762	0.0868639	0.0487606	0	0	0	0.0499869	0.616627	0	0	0.088052	0	0	0.0772621	0	0.457074	0	0.0526405	0.0822495	0.0373716	0.073034	0	0.0473963	0	0	0.132918	0	0.115249	0	0	0.156655	0.049794	0	0.0802585	0	0.123444	0.0735463	0.0849816
AC133528.1	0.606929	0	0.338144	0.0568026	0.0522242	0.0270477	0.423623	0.0646751	0.0190422	0.134509	0.0701494	0.0942281	0	0.157306	0.128014	0.155622	0.0817982	0.0460749	0.196743	0.123931	0.0379287	0.101451	0.147354	0.026283	0.195843	0.261191	0	0.0392823	0.291125	0.0758126	0.0344469	0.235614	0.0908282	0.0655305	0.319228	0.104818	0.204193	0.139512	0.212459	0	0.0402566	0.0721977	0	0.0366902	0.314404	0.207582	0.170675	0.0677905	0.0979136
AL023802.1	0.0053927	0	0.00400597	0	0	0	0.00410616	0	0	0.00478056	0	0	0.0256105	0	0.0077995	0	0	0	0.00466161	0	0.0121321	0	0	0	0	0	0	0	0	0	0.00367281	0	0	0	0	0.00372531	0	0	0.0641833	0	0	0	0	0	0.00394383	0	0	0	0.00417592
AC068987.3	0	0	0.014725	0.0148413	0.0272902	0	0.135839	0	0.07463	0	0	0	0.0313793	0.0176146	0.0860072	0.017426	0	0	0.10281	0	0	0.0636169	0.0462007	0.0206016	0.432615	0	0	0	0.0380324	0.0297123	0.0810021	0.0527665	0.0177986	0	0.125111	0	0.0320107	0.0273386	0.0138778	0.0377776	0.0315546	0	0	0	0	0	0.163511	0	0.0306993
AL391095.3	0	0	0.0210035	0.0846779	0.0194632	0	0.0430577	0	0	0	0	0	0	0	0.0204466	0.099425	0	0.0257571	0	0.0461871	0.0636095	0	0	0.0587717	0	0	0.0471041	0	0	0	0.0192568	0	0	0	0	0.039064	0.0228299	0.0389955	0.0791804	0	0	0.026907	0.0769733	0.0205108	0.0206777	0.0257876	0	0	0
AC008743.1	0	0	0	0	0	0	0	0	0	0	0	0	0	0	0	0	0	0	0	0	0	0	0	0	0	0	0	0	0	0	0	0	0	0	0	0	0	0	0	0	0	0	0	0	0	0	0	0	0
AL133215.1	0	0	0.132654	0	0.327801	0	0.181295	0	0.0448216	0.105536	0	0	0.282689	0	0.473501	0.0523289	0	0.0542256	0	0.0486181	0	0	0	0	0.712415	0	0	0	0	0.0446119	0.243243	0.158454	0	0	0.0469624	0.12336	0.240315	0	0.333391	0	0.379024	0.113293	0	0.0431807	0.087064	0	0.223187	0	0
AL137001.1	0	0	0	0	0	0	0	0	0	0	0	0	0	0	0	0	0	0	0	0	0	0	0	0	0	0	0	0	0	0	0	0	0	0	0	0	0	0	0	0	0	0	0	0	0	0	0	0	0
AL606760.2	0.13273	0.191534	0.258821	0.149066	0.182735	0.106472	0.429524	0.169726	0.187396	0.176495	0.0805403	0.113337	0.341438	0.0884606	0.275954	0.247955	0.0536655	0.0906853	0.573678	0.10841	0.199071	0.119807	0.290025	0.137948	0.0934449	0.102816	0.165843	0.180404	0.175082	0.0870424	0.237296	0.132497	0.0893847	0.0716545	0.0916284	0.137536	0.107172	0.0915298	0.116157	0.126479	0.396168	0.0947338	0.165615	0.108321	0.0849353	0.0453963	0.273717	0.177902	0.141324
AC106795.2	0.0859567	0.647757	1.39412	0.25743	0	0.965324	0.0436334	0.439663	0.658036	0.342899	0.417268	0.836293	0.0113394	0.318265	0.01036	0.390423	0.370711	0.535081	0.445822	0.409541	0.0214867	0.551735	0.166953	0.74447	2.47105	0.488286	1.43202	0	0.439795	0.246951	0.887898	0.705516	0.167227	0.346483	0	0.178138	0.277622	0.237102	0.0401196	0.518757	0	0.109067	0	0.301384	0.0209542	0.444251	0.547899	0.595254	0.033281
AC091932.1	0	0	0	0	0	0	0	0	0	0	0	0	0	0	0	0	0	0	0	0	0.0357524	0	0	0	0	0	0	0	0	0	0	0	0	0	0	0	0	0	0	0	0	0	0	0	0	0	0	0	0
MID1IP1-AS1	0.920415	0.208344	0.442414	0.243224	0.708129	0.463264	1.85514	0.138467	0.529992	0.0479963	0.22528	0.302607	1.67132	0.769795	1.99681	0.380776	0.0875633	0.147967	1.26366	0.221109	0.527824	0.0868811	0.946439	0.506437	1.14352	0.11184	0.631395	0.294356	0.467465	0.365201	1.58561	0.288251	0.243074	0.420894	0.384443	0.149607	0.786902	0.373361	0.530677	0.103185	1.46519	0.154572	0.638714	0.432037	1.50463	0.592566	3.57288	0.507978	0.167703
AC082651.1	0	0	0.0181761	0	0	0	0	0.0208588	0	0	0	0	0.0193669	0.021743	0.0176942	0	0	0	0	0	0	0.0196318	0	0.0254301	0	0	0	0	0	0	0	0	0	0	0	0	0	0	0.0171304	0.0466317	0	0.0465698	0	0	0	0.0223162	0	0.0327953	0
AL358075.2	0	0	0.0892185	0	0.868093	0.0642284	1.05167	0.0511932	0.0904366	0	0	0.0372928	0.0950635	0	0.390838	0	0	0.0547054	0.674833	0	0.0450333	0.0481818	0.0699825	0	0.380499	0.124047	0.200088	0.0466405	0.748924	0	0.0817986	0	0	0	0.758049	0	0.0484882	0	0.168171	0	0.382379	0.171443	0.0544944	0	0.175669	0	0.180129	0	0.418515
LINC01940	0	0	0	0	0	0	0	0	0	0.00517244	0	0	0	0	0	0	0	0	0	0.00476566	0	0	0	0	0	0	0	0	0.0167925	0	0	0	0.00523909	0	0	0	0	0	0	0	0	0.00555261	0	0	0	0	0	0	0.00451822
CTBP1-DT	4.04806	0.61107	1.0578	0.58863	1.34759	0.484473	1.53818	0.41278	1.77205	0.620785	0.760038	0.549664	1.22395	0.976222	1.88444	0.260895	0.762047	0.476672	1.84752	0.461399	2.0791	1.19265	2.17218	0.641228	2.69231	0.857706	1.77381	1.2657	1.20624	0.554101	2.84035	0.644474	0.752672	0.67233	1.90803	0.695958	1.4798	0.667811	1.95744	0.749161	1.53745	0.706051	1.50482	0.921571	3.29743	0.925979	2.53392	1.09212	1.18533
LINC00649	0.0142002	0.0956265	0.3903	0.0999407	0.358744	0.130616	0.0432499	0.046001	0.384936	0.0969301	0.18612	0.219582	0.0236034	0.0593079	0.252616	0.161038	0.0528214	0.0401018	0.876442	0.110184	0.663427	0.481943	0.417025	0.21695	0.692812	0.0689326	0.11592	0.178669	0.198893	0.0989765	0.482601	0.238145	0.0127505	0.12143	0.16581	0.0627814	0.376081	0.12926	0.693933	0.205679	0.284823	0.206758	0.0154634	0.199843	0.229509	0.2396	0.267282	0.197943	0.0934673
LINC02052	0.00756219	0	0	0	0	0	0	0	0	0	0	0	0	0	0	0	0	0	0	0	0	0	0	0	0	0	0	0	0	0	0	0	0	0	0	0	0	0	0	0	0	0	0	0	0	0	0	0	0
AC022613.2	0.238509	0.445405	0.177176	0.252108	0.75331	0.570221	0.993501	0.287049	0.200724	0.373121	0.496207	0.322373	1.08828	0.561033	1.40012	0.234344	0.340356	0.255619	0.169791	0.183348	0.410327	0.258907	0.506855	0.306213	0.22718	0.449209	0.257108	0.359592	0.821025	0.2103	0.162442	0.44817	0.239355	0.399912	0.531313	0.193839	0.657047	0.348299	0.392901	0.133693	0.268008	0.226976	0.509265	0.376574	0.143647	0.371085	0.831158	0.300876	0.358522
AC015853.3	0.127766	0	0	0.0956612	0.0293169	0	0.129713	0	0	0	0.0295347	0	0.0674195	0	0.0307983	0	0	0.155189	0.036815	0	0	0	0	0	0.0299835	0.0439872	0	0	0	0	0.029006	0	0	0	0	0	0	0	0.0596338	0	0	0.0405294	0.0386477	0	0	0.0388432	0	0	0
DPP10-AS1	2.43471	0.0196827	0.0151985	0.0612745	0	0.0218828	6.2003	0.418601	0	0.19951	0.624295	0.0889406	0	0	0	0.197851	0	0.0186383	0.017686	0.0167109	0	0.0492472	0	0.148849	0.0576165	0.0211316	0.0340853	0.0158906	0.0588833	0.107338	0	0.0272318	0	0.0176724	0	0.0424011	0	0.0282179	0	0.116978	0	0.0584112	0	0.059368	7.66093	0.0373207	0	0.0274228	0
JAZF1-AS1	0.0348245	0.033502	0.0295651	0.00744967	0.0924644	0.0425678	0.0265165	0.00848216	0.00374609	0.0220511	0.00690008	0.00617902	0.0551284	0.0132626	0.0143906	0.0131206	0.0241377	0.0135961	0.0559063	0.0162535	0.0111923	0.0119748	0.0231907	0.0103411	0.0245173	0.0205532	0.0497286	0.00772783	0.501127	0.0111857	0	0.0132432	0	0.00429717	0.0235501	0.00687343	0.0441869	0.0411683	0.010449	0.00948133	0.015839	0.0142031	0.0541747	0.00360894	0.00363831	0.00453741	0.0223841	0.0200042	0.00385242
AC021180.1	0	0	0	0	0	0	0	0	0	0	0	0	0	0	0	0	0	0	0	0	0	0	0	0	0	0	0	0	0	0	0	0	0	0	0	0	0	0	0	0	0	0	0	0	0	0	0	0	0
AL161716.1	0	0	0	0	0	0	0	0	0	0.0661049	0	0	0	0	0	0	0	0	0	0	0	0	0	0	0	0	0	0	0	0	0	0	0	0	0	0	0	0	0	0	0	0	0	0	0	0	0.0559193	0	0
AC025566.1	0.0337043	0	0	0	0	0	0	0	0	0	0	0	0	0	0	0	0	0	0	0	0	0	0	0	0	0	0	0	0	0	0	0	0	0	0	0	0	0	0	0	0	0	0	0	0	0	0	0	0
TNFRSF10A-AS1	1.88554	0.953082	0.213662	0.837474	0.813971	1.02544	1.19237	2.26126	3.27275	0.793258	1.10813	0.952635	0.860048	0.766774	0.947542	1.15189	0.7236	1.39744	0.745894	0.365437	0.431386	0.948736	1.1173	1.09609	0.877477	0.726169	1.17132	1.04249	0.643834	0.40718	0.195893	0.382827	0.286957	0.745319	0.579916	1.12593	1.08379	0.881531	0.492236	1.03541	0.81398	0.608259	0.754024	1.32145	3.29545	0.524658	1.60568	1.1137	0.272221
Z82198.1	0	0	0.0346053	0	0	0	0	0	0	0	0	0	0	0.0413963	0	0	0	0	0	0	0	0	0	0	0	0	0	0	0.0893805	0	0.0317274	0	0	0	0	0	0	0	0.0326144	0	0	0	0	0	0	0	0	0	0
AC010809.2	0.0844706	0.0812627	0.109811	0.0632449	0.290737	0.0677596	0.562787	0.0360052	0.0795073	0.112323	0.131803	0.0393432	0.10029	0.13136	0.290155	0.278472	0.0341533	0.0769508	0.657171	0.0517449	0.22171	0.271098	0.34454	0.131688	0.044602	0.0872444	0.0351814	0.229622	0.222849	0.110789	0.129444	0.056215	0.113771	0.0364814	0.149949	0.116706	0.187565	0.0873758	0.103493	0.0804929	0.0336168	0.180869	0.172471	0.0459579	0.154439	0.0770418	0.221705	0.113219	0.163528
AC098850.2	0	0	0	0	0	0	0	0	0	0	0	0	0	0	0	0	0	0	0	0	0	0	0	0	0	0	0	0	0	0	0	0	0	0	0	0	0	0	0	0	0	0	0	0	0	0	0	0.03539	0
AL365204.1	0	0	0	0	0	0	0	0	0	0	0	0	0	0	0	0	0	0	0	0	0	0	0	0	0	0	0	0	0	0	0	0	0	0	0	0	0	0	0	0	0	0	0	0	0	0	0	0	0
AL121987.1	0	0	0	0	0	0	0.0720966	0	0.0237659	0	0	0	0.0749454	0.0280468	0	0	0	0	0	0	0	0	0	0	0	0	0	0	0	0	0	0	0	0	0	0	0	0	0.464034	0	0	0	0.0286412	0	0	0.0287862	0	0.12691	0
LINC01961	0	0	0	0	0	0	0	0	0	0	0	0	0	0	0	0	0	0	0	0	0.061475	0	0	0	0.0192377	0	0	0	0	0	0	0	0	0	0	0	0	0	0	0	0	0	0	0	0	0	0	0	0
AC098872.1	0	0	0	0	0	0	0	0	0	0	0	0	0	0	0	0	0	0	0	0	0.112459	0	0	0	0	0	0	0	0	0	0	0	0	0	0	0	0	0	0	0	0	0	0	0	0	0	0	0	0
AC025773.1	0	0	0	0	0	0	0	0	0	0	0	0	0	0	0	0	0	0	0	0	0	0	0	0	0	0	0	0	0	0	0	0	0	0	0	0	0	0	0	0	0	0	0	0	0	0	0	0	0.0282005
AC007529.1	0	0	0	0	0	0	0	0	0	0	0	0	0	0	0.00675921	0	0	0	0	0	0	0.00749938	0	0.00971434	0	0	0	0	0	0	0	0	0	0	0	0	0	0	0	0	0	0	0	0	0	0.00852482	0	0	0
AC092620.3	0.0147304	0	0.00547125	0	0	0	0	0	0	0	0	0	0	0	0.00532618	0	0	0	0.0127334	0	0	0.00590942	0.0171665	0.00765478	0.00518528	0	0	0	0.00706572	0	0.00501623	0	0	0	0	0	0	0	0	0	0.0117245	0.00700907	0.0200509	0.00534291	0.00538638	0	0	0	0
AC009055.1	0	0	0	0	0	0	0	0	0	0	0	0	0	0	0	0	0	0	0.0450642	0	0	0	0	0	0	0	0	0	0	0	0	0	0	0	0	0	0	0	0	0	0	0	0	0	0	0	0	0	0
TAF1A-AS1	1.08105	0.877917	3.01408	0.48354	0.405908	0.510549	2.81152	0.382996	0.211434	0.734311	0.662065	0.723661	3.16709	0.673703	0.385807	0.345587	0.590358	0.4988	0.606813	0.848569	1.52663	0.754727	0.376313	0.45234	2.87631	0.667028	0.58474	1.12314	0.848529	0.947004	0.659776	1.27069	0.365583	0.460823	2.12672	0.455836	1.00892	0.367903	2.46715	0.96325	1.8997	0.708119	0.866347	0.80459	0.492842	0.665853	1.87403	0.715073	0.869743
AL353614.1	0	0	0	0	0	0	0	0	0	0	0	0	0	0	0	0	0	0	0	0	0	0	0	0	0	0	0	0	0	0	0	0	0	0	0	0	0	0	0	0	0	0	0	0	0	0	0.0741066	0	0
AL513365.2	0.192414	0.148085	0.057174	0.0864387	0.0529811	0	0.351624	0	0.086932	0.0682292	0	0.0477968	0.487357	0.0683939	0.111316	0.0338308	0.0622378	0.0701139	0.731846	0	0.0865763	0.0926294	0.089694	0	0.0812785	0.079493	0.192334	0	0	0	0.104838	0	0.138217	0	0.151807	0	0	0	0	0.0733414	0.0612601	0.036622	0.139687	0.0837493	0.0844307	0.210591	0.202007	0	0.119199
PCBP1-AS1	0.657863	0.290485	0.730728	0.35349	0.554283	0.327395	0.429809	0.309602	0.203928	0.353224	0.377063	0.3847	0.925615	0.494232	0.762379	0.589283	0.416183	0.445219	1.3598	0.321208	0.469217	0.74013	0.360353	0.286864	0.604872	0.329015	0.478844	0.373942	0.316552	0.490715	0.436038	0.457141	0.219883	0.322659	0.511658	0.442987	0.661053	0.227545	0.525233	0.377712	0.298975	0.398935	0.335216	0.334212	0.387015	0.477923	0.343151	0.392199	0.258731
AC015802.5	0.0510211	0.0490835	0.0379011	0.152802	0.316094	0	0.233094	0	0.0768371	0.0904593	0.0707648	0.0950546	0.323073	0.181355	0.147585	0.179413	0.165032	0.046479	0.441042	0.0416726	0.306091	0.163746	0.118918	0.0530271	0.0718402	0	0.0849998	0.118881	0.489465	0.0764776	0	0.0679088	0.0916249	0.0881404	0.0805071	0.0704914	0.164787	0.140736	0.178602	0.194474	0	0.0971081	0.0925994	0.074024	0.0746263	0.139602	0.0765211	0.341926	0.039509
LINC01970	0.0449888	0	0.0417749	0.016842	0.154845	0	0.111331	0.0287644	0.0846906	0	0.00779976	0.0139694	0.347192	0	0.113868	0	0.0363799	0	0.0972242	0.00918639	0.143385	0.0451206	0.0393216	0	0.0079183	0	0.0187375	0.00873544	0.194217	0.0168589	0.0383007	0	0.020198	0.00971493	0.00887357	0	0.0272445	0	0.11024	0.0214351	0.0179042	0	0.244954	0	0.0411269	0	0.0253027	0	0.0261283
LINC00412	0	0	0.0720121	0	0.0333655	0	0.0369066	0	0.0364976	0	0.0336133	0	0.0767298	0	0.175257	0	0	0	0.125697	0	0.145393	0.0388896	0.0564859	0	0.0341241	0	0	0	0	0.0363269	0	0.0645134	0.0435218	0	0.0764817	0	0.0782739	0	0	0	0	0	0	0	0	0	0.0363475	0	0.0375335
CLMAT3	0	0	0.00690211	0	0.00639594	0	0	0	0.020989	0	0.0128869	0.0230804	0	0.0247698	0	0	0	0.00846424	0	0.00758894	0.0139354	0.00745488	0.0216559	0	0.0261654	0	0.0154792	0	0	0	0	0	0	0	0	0	0.00750229	0	0	0	0	0.0176842	0.0252947	0.00674021	0.00679505	0.00847424	0.0139352	0.0124535	0.00719493
AL365181.1	0	0	0	0.00833809	0	0	0.0169593	0	0	0	0	0	0.00881469	0	0	0	0	0	0	0	0	0	0.0129782	0	0	0	0	0	0	0	0	0	0	0	0	0.00769313	0	0	0	0	0	0	0	0	0.00814439	0	0.00835118	0	0
IFNG-AS1	0.00957996	0.0276484	0	0.0143454	0	0.0102463	0	0.00816682	0	0.0254776	0.0332178	0	0.00758271	0.0170261	0	0	0	0	0.0248436	0.0391232	0.00718413	0.00768642	0.100478	0.00995662	0.0269781	0.0197891	0.0478799	0.0520838	0	0.0215397	0	0	0	0.0248245	0.00755819	0.0529432	0	0	0	0.0182577	0.0152502	0.0911673	0	0.0416973	0.273238	0.0349498	0	0.102723	0.0296736
AC087286.4	0.109155	0.0262524	0	0	0.0187849	0	0	0.0232634	0.0205483	0.0483824	0.0189244	0.0169467	0	0	0.019734	0.0239899	0	0	0	0	0.0204642	0	0.0318017	0	0	0	0.0454624	0	0	0	0	0	0	0	0.0215297	0	0	0	0.0191052	0.0520075	0	0.0259692	0	0	0.0399141	0.0248888	0	0.036576	0
AC023310.4	0.0313191	0	0.139593	0.093797	0	0	0	0.0266992	0	0	0.0434387	0.0388993	0.123948	0	0	0.0275331	0	0	0.0270732	0.0255806	0	0.0502574	0.0364986	0	0.0220494	0	0.104354	0.0486497	0	0	0	0	0.112487	0	0.0247095	0	0.227596	0.129585	0	0.179066	0.0498563	0.119219	0	0.136318	0	0.0285647	0	0.0839559	0
LINC00642	0	0	0.0146253	0	0.0135527	0	0	0.00839192	0.0222374	0.00872661	0.00682668	0.00611328	0.00779171	0.00874767	0	0	0	0	0.00850947	0	0	0.0236948	0	0	0.00693042	0	0.0163999	0	0	0.0073778	0.00670448	0	0	0.00850291	0.00776652	0	0	0	0	0.0187609	0	0	0	0	0	0.0179565	0.00738199	0	0
ATP2B1-AS1	0.218596	0.12402	0.229003	0.146881	0.246934	0.107908	0.0896244	0.0955644	0.0928519	0.154032	0.182689	0.274983	0.168586	0.204212	0.145919	0.167533	0.172233	0.188924	0.140509	0.119029	0.226977	0.3148	0.444173	0.15146	0.0828674	0.115781	0.112054	0.169778	0.220461	0.0714135	0.25195	0.164125	0.080525	0.174291	0.0972867	0.108415	0.0588347	0.0618431	0.105952	0.0320465	0.0803027	0.197358	0.106813	0.126047	0.122973	0.240268	0.100876	0.172789	0.13021
AC027796.4	0.885105	0.0896307	0.415264	0.191833	0.112236	0.0249124	0.603004	0.099282	0.508628	0.0825933	0.161528	0.0578593	0.350288	0.0827926	0.269502	0.614296	0.263692	0.233406	0.604036	0.0951223	0.0349343	0.130819	0.542885	0.12104	1.01669	0.120285	0.27163	0.0723622	0.0893805	0.104741	0.0951821	0	0.0836575	0.040238	0.165389	0.144814	0.300916	0.0642489	0.0489215	0.221954	0.185392	0.22166	0.0211368	0.0506904	0.323651	0.0637314	0.454136	0.124877	0.324661
BX323046.1	0.152205	0.0366062	0	0	0.0261935	0	0	0.0324383	0	0.033732	0.026388	0	0.210828	0	0.0275169	0	0	0	0.164463	0	0	0	0.0886881	0	0.026789	0	0.190177	0.0886606	0.073008	0.0285183	0.0259156	0.050646	0	0	0	0	0	0	0	0	0	0	0.20718	0.0828101	0	0.0347048	0.199742	0.0510013	0.0294656
AC067852.2	2.25313	0.787436	0.581887	0.843484	1.1996	1.30848	2.08419	1.08794	3.40644	0.749017	1.13527	0.819862	1.66497	1.24355	2.54588	1.01359	1.67964	1.32293	1.47597	0.603848	1.10884	1.10868	1.58981	1.03365	1.61105	0.818128	2.78592	0.922829	2.761	0.943273	1.70239	0.948874	1.46202	0.84385	2.42341	1.10048	1.17259	0.849708	1.60209	1.12384	1.42908	1.14747	1.69321	1.27694	2.45236	1.05157	1.94702	1.13248	1.20633
AC005790.1	0.316671	0	0	0	0.0311411	0	0	0.0771311	0	0	0	0	0	0.0402004	0	0	0	0	0.0782115	0	0	0.036297	0	0	0.127397	0	0	0	0.0867984	0.0339051	0.0616216	0.0602125	0	0	0.0356915	0	0	0	0.0316722	0	0	0	0	0	0	0	0.0339244	0	0
AL109811.3	0.257393	1.30562	0.816964	0.840939	0.612084	0.900969	2.19149	0.837803	0.334771	0.82973	0.649084	0.930006	2.38921	1.10205	1.84443	1.83079	0.794712	1.36424	3.37793	0.516022	1.80739	1.74601	1.60887	0.462067	0.642474	0.894205	0.818636	0.78147	1.14484	0.91193	0.302796	0.622888	1.13457	0.505288	0.590755	0.614247	1.00137	0.74226	1.34334	1.07028	0.372489	0.890715	0.806892	0.882673	0.701616	1.19512	0.754525	0.689983	0.326153
AC016723.1	0	0	0.0164019	0.033063	0.015199	0.0472309	0.0336242	0.0188227	0	0.0195733	0.0153119	0.109694	1.10101	0	1.21349	0.0194105	0.107127	0.0804561	0	0.0360681	0.082789	0	0.154387	0.0458955	0	0.0456093	0	0.0171487	0.529546	0.0661921	0.0150378	0.117551	0.0396511	0.0572148	0.0522597	0	0.0356562	0	0.123666	0.0841596	0.0351481	0.063036	0.420765	0.0480514	0.0322949	0	0.0496723	0.029594	0.0170977
AL137003.2	1.2593	1.26549	0.434966	1.29719	1.41902	1.23537	2.77279	1.36757	1.40727	1.71365	1.83006	2.08214	2.89505	2.27375	3.57308	1.78401	0.765368	1.41025	2.07316	1.1989	1.42557	1.55099	1.11236	1.00037	0.316233	1.15154	0.84186	1.51383	0.854133	1.3526	0.595457	1.46261	0.453738	0.491909	2.84139	0.919804	3.96366	1.25007	4.32965	1.51338	1.5833	1.16025	3.53022	1.92016	1.37265	1.37534	4.37889	1.05358	0.875782
AL034548.1	0	0	0.00904458	0	0	0	0	0	0	0	0	0	0	0	0	0	0	0	0	0.0099446	0	0	0	0	0	0	0	0.00945643	0	0	0	0	0	0	0	0	0	0	0	0	0	0.0115868	0	0	0	0	0	0	0
LINC01657	0	0	0	0	0	0	0	0	0	0	0	0	0.00890727	0	0	0	0	0	0	0	0	0	0	0	0	0	0	0	0	0	0.0153288	0	0	0	0	0	0	0	0	0	0	0	0	0	0	0	0	0	0
LINC02011	0	0	0	0	0.00731775	0	0.0040472	0	0.00400235	0	0.00368605	0	0	0.0141699	0.0538125	0	0	0	0	0	0	0	0	0	0	0	0	0	0	0.00398363	0.00362007	0	0	0	0.00419351	0	0	0	0	0	0	0	0	0	0	0	0.0119577	0	0
LINC01926	0	0	0	0	0	0	0	0	0	0	0	0	0	0	0	0	0	0	0	0	0	0	0.0496319	0	0	0	0	0	0	0	0	0	0	0	0	0	0	0	0	0	0	0	0	0	0.0311463	0	0	0	0
AF127936.1	0.117165	0.140894	0.282867	0.285103	0	0.0313287	0.0669098	0	0.264673	0.103865	0.203131	0.0363806	0.0927382	0	0	0	0.0473724	0	0.0506405	0	0	0.681548	0.136541	0.0608858	0.103109	0	0.195194	0.0909994	0.0281002	0.0658588	0.0598483	0.11696	0	0.303609	0	0.101173	0.0236511	0	0.164057	0.279119	0.0466282	0.0557498	0.0797421	0.169989	0.42843	0.187006	0.153758	0.0785199	0.0680464
AL162430.2	0.0467987	0.0450214	0.0347644	0.140157	0	0	0.0356339	0	0.0704782	0.0414865	0.0324542	0	0.037042	0.0415866	0.101528	0	0	0	0.0809084	0	0	0.0375486	0	0.0486387	0.0329474	0	0	0	0	0.0350742	0	0.0622888	0	0	0.0738444	0.0323288	0	0	0.0327643	0	0.148996	0	0	0.0678979	0.0342252	0	0.0350942	0	0
AC096540.1	0.0307979	0.0888849	0.205904	0.138354	0.296806	0.131761	0.351757	0.0787647	0.208716	0.27302	0.149505	0.133882	0.341279	0.109472	0.289532	0.243674	0.149427	0.0841686	0.452585	0.251549	0.207862	0.148263	0.358912	0.192053	0.238507	0.222665	0.0513085	0.0478401	0.325002	0.115411	0.335609	0.0819837	0.331846	0.345828	0.14579	0.234029	0.0994706	0.0849524	0.409678	0.117391	0.196106	0.23447	0.279479	0.201074	0.405421	0.196626	0.254048	0.206397	0.119244
AC068506.1	0.607684	0.0876909	0	0.159245	0	0.0324976	0.300761	0	0.0915164	0.269353	0.147497	0.0754762	0.0240496	0.0270003	1.05468	0.293823	0.34398	0.0553586	0	0.297804	0	0.17065	0.424909	0.0315788	0	0.0627639	0	0.18879	0.0291487	0.0455441	0.165551	0	0.518364	0.104979	1.702	0.0419792	0.147202	0.293339	0	0.0579068	0.0967361	0.260235	0.0275725	0.0220415	0.355533	0.27712	0.934186	0.244349	0.964668
AC011120.1	0.0326241	0.0313851	0	0.0244263	0	0	0.0496819	0	0.0245657	0	0	0	0	0	0	0	0	0	0	0	0	0	0	0	0	0	0	0	0	0	0	0.0434225	0	0	0	0	0	0	0.045681	0	0	0	0.0296051	0	0	0	0.0244647	0	0
AC123768.1	0	0	0	0	0	0	0.0413354	0	0	0	0	0	0.0214843	0	0	0	0	0	0.0469269	0	0.0407101	0	0.0316321	0	0	0	0	0	0	0	0	0	0.0243722	0	0	0	0	0	0.0190033	0	0.0432088	0	0	0	0.0198506	0	0.0407092	0	0
EPB41L4A-DT	3.95191	0.0982021	0.465809	0.218367	0.220843	0.514701	0.0111037	0.422674	0.3404	0.400749	0.343838	0.226402	0.0577122	0.220296	0.0632732	0.269217	0.566025	0.318828	0.100846	0.3335	0.251522	0.245707	0.169943	0.242497	0.431195	0.0753077	0.631653	0.430389	0.153887	0.229515	0.91373	0.213504	0.340443	0.277112	0.115051	0.110812	0.176621	0.321797	0.153143	0.222336	0.208925	0.582857	0.198498	0.211573	0.266618	0.172902	0.153097	1.03592	0.135508
AC092071.1	0	0.0356727	0.220365	0.0277632	2.73123	0.0396602	0.141173	0	0.307138	0	0	0.161195	2.87632	1.38395	7.29374	0.0651967	0	0.10134	0.160269	0.27258	0.472726	1.39833	0.216066	0.192694	0	0.459582	0	0.431999	0	0.472448	0.126274	0.345481	0.0998862	0.0640584	2.34042	0	0	0.255708	3.21914	0.282678	0.35417	0.635182	7.40289	0.833883	0	0.372018	0	0.74551	0.143571
AC098848.1	0	0	0	0	0	0	0.0273382	0	0	0	0	0	0	0.0319051	0	0.0315635	0	0	0	0	0	0	0	0	0	0	0	0	0	0.0269088	0	0	0	0	0.0283266	0	0	0	0	0	0	0	0.0651626	0	0	0.0327462	0	0	0.0556052
AC003956.1	0.228735	0.0550121	0.339832	0	0.0787275	0	0.0435415	0	0	0	0.0396561	0.071024	0.181048	0	0.124058	0.100542	0.0924826	0.208372	0.395451	0.0934122	0.0428828	0.0917621	0.333203	0.0594321	0.805175	0.118123	0	0.13324	0	0.17143	0.350516	0.152223	0	0.0987866	0	0.0395029	0.138518	0.0788673	0	0.435928	0.0910297	0.272093	0	0.0829651	0.836401	0.208619	0.128646	0.229935	0.0442811
AL356259.1	0	0.0184932	0	0	0.0264655	0	0	0	0	0	0	0	0	0	0	0	0	0	0	0	0	0	0	0	0	0	0	0	0	0	0	0	0	0	0	0	0	0	0	0	0	0	0	0	0	0	0.0144154	0	0
AC006205.2	0	0.630058	0.283801	1.18504	0.375697	0.758859	4.23881	0.930536	0.739737	2.32235	1.32471	1.42353	12.8301	1.50347	2.48648	1.48738	0.617873	0.298313	1.13228	0.222887	0.286499	2.32087	5.08827	2.32566	0.0384239	2.25479	0.181849	2.50096	16.1787	4.21314	0.0371712	0.799067	18.6222	0.612848	10.8079	0.565538	1.05764	1.05382	0.267473	0.520075	1.73762	0.882954	0.148581	0.910615	0	0.0497777	3.11049	2.34086	8.66391
AL591468.1	0	0.0683571	0.0791756	0.452207	0.0244564	0	0	0	0.0802565	0.031495	0.024638	0.0220633	0	0.094713	0	0	0	0	0.0921339	0.0290181	0	0.31356	0.12421	0.110774	0.0500248	0.110083	1.06539	0.386311	0	0.026627	0	0.0472873	0	0.0920629	0	0.0245428	0	0	0	0	0	0.0338099	0	0.0257728	0.259825	0	0.0532843	0.142857	0.137557
AC040977.2	0	0	0	0	0	0	0	0	0	0	0	0	0	0	0	0	0	0	0	0	0	0	0	0	0	0	0	0	0	0	0	0	0	0	0	0	0	0	0	0	0	0	0	0	0	0.0372833	0	0	0
AC107980.1	0	0	0	0	0	0	0	0	0	0	0.00420792	0	0	0	0	0	0	0	0	0	0	0	0	0	0	0	0	0	0	0	0	0	0	0	0	0	0	0	0	0	0	0	0	0	0	0	0	0	0
AL591846.2	0.0568643	0	0.0422417	0.0851509	0.0782877	0	0.0865964	0.242381	0.342548	0.252048	0.0394346	0.0706272	0.135027	0	0.0411217	0	0.0919659	0.155406	0.245776	0.0464452	0.170573	0.0912494	0.198805	0.0591001	0.240203	0.0587316	0.568406	0.132496	0.327312	0.0852362	0.116186	0	0.255296	0	0.134591	0.0785644	0	0	0.238868	0	0.181042	0.0541147	0.0516022	0.123752	0.0831729	0	0.170569	0	0.0880675
LINC02159	0	0	0.0585892	0	0	0	0.607219	0.00747073	0.0527904	0	0	0	0.0763004	0	0.00633731	0	0	0	0	0	0	0	0.0919141	0	0.0431876	0	0.77378	0.0408381	0.00840708	0.00656792	0.0835592	0	0.00786878	0	0	0	0	0.0120864	0.0122708	0	0.0279006	0	0	0.00635721	0.0256357	0	3.16754	0.0234918	0.0271444
AP000561.1	0	0	0	0	0	0	0	0	0	0	0	0	0.037042	0	0.0338427	0	0	0	0.121363	0	0	0	0	0	0	0	0.0779653	0	0	0	0	0	0	0	0.0369222	0	0.113362	0	0	0	0	0	0	0	0	0	0.0350942	0	0
RASAL2-AS1	0.345627	0.00831252	0.0641873	0.0711639	0.196284	0.1109	0.138165	0.0589287	0.813296	0.0995782	0.161789	0.0858558	0.136785	0.0844618	0.231196	0.167115	0.12577	0.125943	0.246486	0.0635171	0.0583177	0.187185	0.0906267	0.143686	0.109498	0.0713952	0.287903	0.0805321	0.24039	0.084187	0.105929	0.138008	0.0310342	0.074635	0.0818056	0.0895354	0.160468	0.154923	0.163335	0.0329351	0.0687746	0.0493372	0.094093	0.0626816	0.139022	0.10245	0.356379	0.0231627	0.173967
AC079630.1	0.0892869	0.0257688	0.0132654	0.066851	0.307314	0.0572985	0.0611872	0.0456697	0.0201697	0.0949822	0.111455	0.19407	0.473504	0.142817	0.0774819	0.0784934	0.101082	0.10574	0.216111	0.131269	0.294612	0.179097	0.104053	0.0556785	0.0691462	0.110663	0.119	0.152564	0.00856563	0.307822	0.0182432	0.106956	0.00801718	0.254506	0.0563549	0.080184	0.187445	0.0369431	0.0937663	0.0680659	0.0852805	0.127454	0.526659	0.168405	0.0261192	0.0570042	0.0870428	0.0478696	0.0414844
AC013356.2	0.0558503	0	0.0207442	0.0627244	0	0	0.148841	0	0	0.123777	0.058097	0.104052	0.0884129	0.0248151	0.0605826	0.171846	0	0.127196	0.072418	0	0	0.134433	0.0650866	0.0290231	0.0589799	0.0865263	0	0.0216888	0	0.0418581	0.0570571	0	0	0.0241207	0.0660953	0	0.0450961	0	0	0	0.0889069	0.0265748	0.025341	0	0.0408448	0	0.020941	0.0748578	0.0432485
AC025428.2	0	0.00732946	0	0	0	0	0	0	0	0	0	0	0	0	0	0	0	0	0	0	0	0	0	0	0	0	0	0	0	0	0	0	0	0	0	0	0	0	0	0	0	0	0	0	0	0	0	0	0
AL357833.1	0	0.0941553	0.0908806	0	0	0	0	0	0.0184243	0	0	0	0.0774676	0	0.0176942	0	0	0.0222898	0.0634528	0	0.0183489	0	0	0	0	0	0	0	0	0.0183381	0	0	0	0	0	0	0	0	0.0171304	0	0.0389502	0	0	0	0.0357883	0	0	0	0
AC022517.1	0	0	0	0	0	0	0	0	0	0	0	0	0	0	0	0	0.0951555	0	0	0	0	0	0	0	0	0	0	0	0.056444	0	0	0	0	0	0	0	0	0	0	0	0	0	0	0.0426815	0	0	0	0	0
AC010890.1	0.125663	0	0.0746792	0.0940865	0.0346012	0	0	0.0857012	0.151398	0.0891191	0.0522873	0.109254	0	0.0893342	0	0.110472	0	0.0228952	0.0651762	0.123166	0	0.28231	0.0585779	0.0522415	0.017694	0	0.0418703	0.175679	0.0241107	0	0.0513513	0.133806	0.0225669	0.217087	0.1388	0.260427	0	0	0.0351913	0.0957965	0.0400081	0.0478347	0.0684207	0.145855	0.128661	0.0687669	0.0188469	0.235802	0.0194618
AZIN1-AS1	0.754795	0.212009	0.45429	0.251627	0.462692	0.26517	0.625064	0.18787	0.294549	0.200247	0.26363	0.184758	0.248567	0.318231	0.155383	0.382631	0.374235	0.225854	0.171451	0.161999	0.285081	0.393422	0.487964	0.217591	0.380121	0.216234	0.211108	0.205395	0.787528	0.173425	0.630392	0.43265	1.3159	0.123731	0.830225	0.137015	0.226878	0.21276	0.173575	0.315001	0.2368	0.162534	0.479963	0.263782	0.286074	0.185922	0.87175	0.191997	0.887396
AC093627.7	0.0253833	0.00610483	0.032998	0.019005	0.0131049	0.00678723	0.00966381	0	0.0191135	0.00562551	0.00440074	0	0.0100457	0.00563909	0.00917803	0.00557871	0	0	0.0109711	0	0.00475882	0.0356407	0.0443717	0	0.0268057	0	0.021144	0.00492866	0	0.00951202	0.0172879	0	0.022792	0.0109626	0	0.00438374	0.0153717	0	0.0266568	0	0	0.0241559	0	0.0138103	0.037127	0	0.0380697	0.00850551	0.103194
AC104532.2	0.241939	0.133	0.15405	0.0776334	0.261712	0	0.44739	0.0589287	0.0780764	0.0612789	0.167781	0.0643919	0.437712	0.122854	0.774819	0	0	0	0.926188	0.0846895	0.155514	0.360505	0.241671	0.0718432	0.24333	0.14279	0.115161	0.26844	0.0331573	0.103615	0.117698	0.138008	0.0310342	0	0.0272685	0.0716283	0.44652	0.0953371	0.459757	0.131741	0.330118	0.131566	0.156822	0.100291	0.429703	0.0945691	0.440613	0.0463254	0.133821
RBAKDN	0	0	0	0	0	0	0	0.0675272	0	0	0	0.0245958	0	0.0351949	0.0286412	0	0	0	0.10271	0	0.0297009	0.0317775	0	0	0	0	0	0	0	0	0	0	0.0711252	0	0	0	0	0	0	0	0	0	0	0	0.0289649	0	0	0	0
AC234582.1	0.1856	0.00939746	0.0943344	0.0365691	0.275697	0.0417916	0.22314	0.108257	0.102978	0.0606173	0.0270971	0.0242654	0.270616	0.0607636	0.12009	0.137401	0.0157984	0.0800894	0.14355	0.0478715	0.00732547	0.148915	0.125223	0.060915	0.24758	0.0403568	0.195287	0.0379346	0.112455	0.0658904	0.019959	0.0260035	0.043856	0.0253129	0.0924827	0.0337405	0.0709873	0.0134725	0.143619	0.0186169	0.0933011	0.0836648	0.0709159	0.0354314	0.0428636	0.053456	0.183133	0.0654647	0.0529504
AC138057.1	0	0	0	0	0	0	0	0	0	0	0	0	0	0	0	0	0	0	0	0	0	0	0	0	0	0	0	0	0	0	0	0	0	0	0	0	0	0	0	0	0	0	0	0	0	0	0	0	0
LINC00265	0.339835	0.0377226	0.169916	0.0636104	0.094473	0.0768885	0.179142	0.0445701	0.221446	0.156423	0.140496	0.0892873	0.186221	0.0929191	0.278835	0.160867	0.116264	0.0535815	0.225972	0.0373649	0.0392072	0.408997	0.753991	0.115468	0.349676	0.0944984	0.348404	0.111668	0.0313477	0.0930621	0.169138	0.060889	0.0176043	0.0338697	0.283584	0.139953	0.23746	0.0901341	0.123537	0.112096	0.145648	0.124386	0.130472	0.213339	0.497061	0.131132	0.112718	0.297821	0.334006
AC008440.3	0	0.035287	0	0	0.100998	0	0.0558586	0.0312694	0.138099	0.0325164	0	0	0.0580658	0.0325949	0.0530507	0	0.0593221	0	0.0317073	0	0	0	0	0.114367	0.0258236	0	0.244432	0	0	0.0274906	0	0	0	0	0	0.0253388	0	0	0	0	0	0	0	0.0266086	0	0	0	0	0.0568075
AP003086.3	0	0	0	0	0	0	0	0	0	0	0	0	0	0	0	0	0	0	0	0	0	0	0	0	0.0392661	0	0	0	0	0	0	0	0	0	0	0	0	0	0	0	0	0	0	0	0	0	0	0	0
AC025575.1	0	0	0	0	0	0	0	0	0	0	0	0	0	0	0	0	0	0	0	0	0	0	0	0	0	0	0	0	0	0	0	0	0	0	0	0	0	0	0	0	0	0	0	0	0	0	0	0	0
AC008937.3	0.0718497	0.115202	0.195703	0.15242	0.0989188	0.140887	0.209716	0.0918767	0.0360682	0.297239	0.157785	0.163606	0.199046	0.266032	0.190514	0.178965	0.174302	0.218178	0.258788	0.146712	0.179603	0.230593	0.0697767	0.136904	0.193905	0.13605	0.0797998	0.120909	0.137856	0.188472	0.236518	0.191263	0.172039	0.124122	0.453491	0.107541	0.55114	0.0495472	0.402423	0.387976	0.266878	0.205126	0.0760677	0.182426	0.236456	0.262123	0.17062	0.128403	0.120549
AC006130.1	0	0	0	0	0.0252495	0	0	0	0	0	0.0254371	0	0	0	0	0	0	0	0	0	0	0	0.0427461	0	0	0	0	0	0	0	0	0	0.0329354	0	0	0	0	0	0	0	0	0	0	0	0	0	0	0	0
DIRC3-AS1	0.0365483	0	0	0	0.0251589	0	0	0	0	0	0	0	0	0	0	0	0	0	0	0	0.274081	0	0	0	0.0257309	0	0	0	0	0	0	0	0	0	0	0	0	0	0	0	0	0	0	0	0	0	0	0	0
VENTXP1	0	0	0	0	0	0	0	0	0	0	0	0	0	0	0	0	0	0	0	0	0	0	0	0	0	0	0	0	0	0	0	0	0	0	0	0	0	0	0	0	0	0	0	0	0	0	0	0	0
AC025031.2	0	0.18741	0	0.0243094	0.0223501	0.0694527	0.0247221	0.0276786	0	0	0.0450321	0	0.0513979	0.173112	0.0234794	0.0856292	0	0.0591552	0.168398	0.0265189	0.0243481	0.0521009	0.0378374	0.0337445	0.0457165	0.100602	0	0.0756514	0.0622955	0.0973351	0.044226	0	0	0	0.0256159	0.112145	0.0262161	0.0447795	0.0454624	0	0.0516851	0.061796	0.147317	0	0.0474895	0.177675	0.0243476	0	0
ASB16-AS1	4.27837	0.501549	1.29095	0.315993	1.42414	0.469102	3.12536	0.296296	2.59222	0.528194	1.01578	0.883931	4.93878	1.27955	3.34527	0.560175	0.588881	0.361856	5.90163	0.912478	2.50715	1.56033	1.56232	0.550448	3.24512	0.598298	7.81697	1.39472	1.72274	0.694641	4.14819	0.561738	1.37465	0.743389	1.02504	0.388734	2.45895	0.867412	1.98724	0.977825	2.29217	1.5908	2.95127	0.882466	1.93664	0.852878	2.01684	0.953889	1.67894
LINC02102	0.0181547	0.0116435	0.0044954	0.0135928	0.0166629	0	0.0368627	0.00515889	0.00911356	0.0107293	0.00419666	0.0112743	0.0574789	0.0161327	0.0350097	0	0.0587226	0.0165385	0.0209246	0.00494274	0.0136144	0.0242771	0.0352617	0.00628949	0.00426044	0	0	0.0141003	0.0348329	0.00453546	0	0.00805458	0.0163013	0.0104542	0.090714	0	0	0	0.0169471	0.0115332	0.00963335	0	0.0164747	0	0.00442567	0	0.0317663	0.00811108	0.00468611
RNU6ATAC35P	0.0917001	0.396979	0.306538	0.240302	0.189372	0.196157	0.104735	0.273607	0	0.772266	0.34976	0.227789	0.181456	0.366693	0.0331567	0.0403074	0.667374	0.334147	3.40854	0.561736	3.16328	0.698962	0.480893	0.285917	0.290516	0.284134	0.15277	0.249275	0.263914	0.618539	0.780679	0.305131	0.57637	0.198018	0.217043	0.380082	1.77703	0.31618	0.192601	0.262146	0.802866	0.261798	0.208036	0.166304	0.100594	0.418177	0.24068	0.184363	0.426056
LINC01707	0	0.0312349	0	0	0	0	0.0247221	0	0	0	0	0	0.025699	0	0	0	0	0	0	0	0.0243481	0	0	0	0	0	0	0	0	0	0	0	0	0	0	0	0	0	0	0	0	0	0	0	0	0	0	0	0
AC023043.1	12.3014	1.92949	0.670457	1.45162	3.70472	1.78764	0.916301	1.08287	2.08917	1.54093	1.78498	1.95135	12.0386	1.8714	2.75576	2.96806	4.16278	2.5275	1.64706	2.18422	2.70732	1.34102	3.19437	3.68264	3.29474	2.17509	3.11861	1.27216	7.76055	1.2276	1.18386	3.95979	6.03303	1.15494	3.24388	1.40861	0.836721	1.4292	4.02533	1.21043	1.43675	1.36788	4.00413	2.47342	0.440038	1.70732	4.03583	1.65775	1.76019
IL21R-AS1	0	0	0.011566	0.00582869	0	0	0	0	0	0	0	0.00483452	0.0369711	0	0	0	0.0125904	0	0.0269179	0.00635846	0.00583797	0.0249845	0.0544338	0.00809095	0.0164422	0	0.0129694	0.00604633	0	0.0175036	0	0	0	0	0	0	0	0.0107368	0.0218011	0	0	0	0.0282579	0	0.039853	0.0142004	0	0	0.0120567
AL049812.2	0	0	0	0	0	0	0	0	0	0	0	0	0	0	0	0.0602576	0	0	0	0	0	0	0	0	0	0	0	0	0	0	0	0	0	0	0	0	0	0	0	0	0	0	0	0	0	0	0	0	0
BX640514.2	0.325719	0.12534	0.290353	0.195098	0.0224216	0	1.58728	0.0277672	0	0	0	0.303414	0.0257812	0	0.0235545	0.0286344	0.316068	0.0890167	0.50681	0.425661	0	0.0261338	0	0.101558	0.321039	0.100924	0	0	0.0312474	0.195293	0.17747	0.086706	0.233973	0.168807	0	0.0900034	0.0263	0.449228	0.022804	0.124152	0.103701	0	0.384251	0.0236285	5.76461	0.118829	0.0244255	0.0873142	0.0252225
AL356361.2	0	0	0	0	0	0	0.279923	0	0	0	0	0	0.109119	0	0	0	0.0743201	0	0.357513	0	0.0344611	0	0.214213	0.0477603	0	0	0	0	0	0	0	0	0	0	0	0	0	0	0	0	0	0	0	0	0	0	0	0	0
AC083843.1	0	0.0692025	0.0178122	0.0538587	0.0330118	0.025646	0.109546	0.0204411	0.0902768	0	0.0332569	0	0.0759164	0.0639229	0.225419	0	0	0.0218435	0	0.0195847	0	0.0192387	0	0.0498418	0.0844059	0	0.0399469	0.0372465	0.0230031	0.0718836	0.0163308	0.0638295	0	0.0414229	0.132424	0.0331285	0.0387221	0.0661408	0.117512	0.045698	0.0763406	0	0	0.0173943	0	0.0437387	0.0719244	0.0964158	0
AC011284.1	0.0475641	0.0457577	0	0	0	0	0.0181084	0	0	0	0	0	0	0.0211334	0	0	0	0.0433298	0	0	0	0	0	0	0	0	0	0	0	0	0	0	0	0	0	0	0	0	0	0	0	0	0	0	0	0	0	0	0
CTB-178M22.2	2.26643	0.116805	0.180388	0.0303022	0.0278598	0	0.369799	0	0.457127	0	0.0561335	0.0754012	0.384412	0.0719292	0	0	0.0654549	0.221214	0.0699705	0.0330564	0	0	0.0943303	0.0420633	0.142466	0	0.134851	0	0.0388263	0.0303326	0.578851	0	0.327063	0.0349583	0.0957922	0.0279583	0.163395	0	0.0283349	0.154265	0.0644266	0	0	0	0.118393	0.0369127	0.0303498	0.0542459	0.0313401
AC068020.1	0	0	0	0	0	0	0	0	0	0	0	0	0.0243771	0	0.0222717	0	0	0	0	0	0	0	0	0	0	0	0	0	0	0	0	0	0	0	0	0	0	0	0	0	0	0	0	0	0	0.0280894	0	0	0
AC097468.3	1.96431	0.901909	1.19388	1.47072	2.24339	1.33696	2.17555	0.228349	2.05059	1.89964	0.866868	1.05352	0.98941	1.58686	1.4205	3.57145	1.01082	0.854052	7.75683	1.85964	2.41047	2.79391	2.02903	1.53116	0.534311	1.75216	1.33875	1.10955	8.26583	1.67295	1.52027	1.12898	2.8461	1.04116	0.598771	0.9252	3.92914	1.78558	1.7503	2.04198	1.13707	1.1046	0.729221	1.23065	1.92629	0.936497	2.87911	1.07707	2.59278
AC010486.1	0	0	0	0	0	0	0	0	0	0	0	0	0	0	0	0	0	0	0	0	0	0	0	0	0	0	0	0	0	0	0	0	0	0	0	0	0	0	0	0	0.0764306	0	0	0	0	0	0	0	0
AC007100.1	0	0	0	0.0318871	0	0	0	0	0	0	0	0.0264483	0	0	0	0	0	0.0387974	0	0	0	0	0	0	0	0	0	0	0	0.031919	0.029006	0	0	0	0	0	0	0	0	0.0811665	0	0	0	0	0	0	0	0	0
MIR1-1HG-AS1	0.0299638	0.00576518	0.0133552	0	0.016501	0	0	0.0204351	0.00902502	0.010625	0.0207795	0.0111648	0	0	0	0	0	0	0.00518033	0.00978945	0.0089881	0.00961651	0.0349191	0	0.0084381	0.00618955	0	0	0.0114982	0	0	0.00797634	0.0107619	0	0.515357	0.0124195	0	0.00826517	0.00419561	0.0114211	0	0	0	0	0	0.00546573	0	0.00803229	0.00464059
LINC02343	0	0	0.0263919	0	0	0	0	0.0302871	0.0267522	0	0	0.0441266	0	0.031571	0	0	0	0	0	0.0290181	0	0	0	0	0	0	0	0	0	0.026627	0	0	0	0	0	0	0	0.0489996	0	0	0	0	0	0	0	0	0	0	0
AC019254.1	0.0267158	0	0.0198458	0.0400053	0.0367808	0	0.101711	0.0227749	0.120701	0.0947329	0.055581	0.0331818	0.042292	0	0.0193196	0.0704586	0.30245	0.121687	0	0	0	0.0428705	0.249072	0.0832985	0	0	0.178031	0.0207495	0.0256294	0.0200227	0.0363907	0	0.0479768	0.0461523	0.0632329	0.0184554	0.0215715	0	0.0374081	0.0509155	0.0850566	0.025424	0.0242436	0.0387606	0.039076	0	0	0	0.0413755
LINC00607	0.0253202	0.0208788	0.0564274	0.0135412	0.0547791	0.0116063	0.170762	0.0092508	0.266923	0.0160329	0.0225761	0.0157242	0.20614	0.0128573	0.107247	0.0127196	0.0819	0.00988547	0.0406483	0.00886321	0.575063	0.0290221	0.58172	0.00375939	0.00763972	0.0298876	0.0723133	0.0927093	0.0902222	0.0162658	0.00246355	0.0144433	0.0292311	0.00312438	0.0256842	0.0174913	0.0292067	0.0448989	0.612846	0.241279	0.195775	0.0137691	0.0492366	0.162687	0.0264534	0.00989716	1.47018	0.024241	0.764676
PLS3-AS1	0.0784864	0.113259	1.01303	0.139565	0.121563	0.136412	0.806787	0.0250908	0.339824	0.191338	0.129269	0.20715	0.403802	0.104618	0.297979	0.112123	0.142802	0.142999	0.101769	0.17629	0.0809297	0.0787164	0.0228666	0.0509827	0.207211	0.202659	0.441303	0.137157	0	0.132352	0.187092	0.235046	0.0792831	0.288124	0.0774032	0.0271095	0.221807	0.0541239	0.0343433	0.205674	0.218647	0.289429	0.694429	0.234861	0.179373	0.241596	1.03735	0.144647	0.129152
AC022509.2	0.291236	1.20476	1.1899	0.741386	0.9623	1.15253	2.04016	0.546207	1.03071	0.877804	1.33299	1.68202	0.161363	1.75985	0.905618	1.63859	0.894924	1.24696	0.981839	0.594684	1.11385	1.00479	1.0182	0.544837	0.922668	0.721919	0.921865	1.33456	3.57624	1.35329	0.3372	0.736505	1.12447	0.830147	1.12589	0.603564	2.42212	0.803341	1.12144	0.999079	0.973588	1.0809	0.766429	1.5634	0.19169	0.903119	2.03109	1.09299	1.35314
LINC00487	0.00924497	0	0.0274705	0.0484533	0	0	0.0140788	0	0.0069614	0.0409778	0.0192338	0.0114825	0.0292702	0.00821534	0	0.0406369	0.0299035	0.0336878	0	0.0151021	0.00693292	0.0370882	0.290894	0	0.0130174	0	0.0308037	0.251312	0	0.0138577	0.012593	0.012305	0.0415058	0	0	0.0255459	0	0	0.0194175	0	0	0.149565	0	0.00670654	0.0067611	0	0.0138655	0.0619566	0.021477
AC103760.1	3.28542	0.877958	2.2146	1.05683	1.98518	1.23639	2.3719	0.612023	1.44769	1.19736	1.26577	1.80604	1.98406	1.77334	1.60151	1.166	0.649423	1.18609	3.63943	1.69951	2.55503	1.40588	4.43851	0.999084	1.26787	1.86003	1.33795	2.24928	2.96505	2.10665	1.17681	1.79774	1.64982	1.47147	1.75684	1.10117	2.74122	0.788768	0.945622	1.99438	0.987887	1.48222	0.331266	1.50061	1.05898	2.51926	4.08796	2.08761	2.93044
AC103726.2	0	0	0	0	0	0	0.0377147	0	0	0	0	0	0	0	0	0.0870876	0	0	0	0	0	0	0	0	0	0	0	0	0	0	0.0337345	0	0	0	0	0	0	0	0	0	0	0	0	0	0	0	0.0371435	0	0
LINC01711	0.0631564	0	0.140747	0	0	0	0	0.0179467	0.0158521	0	0	0	0	0	0	0	0.0680947	0	0	0	0.0315745	0.0168911	0.171736	0	0	0	0	0	0	0	0	0	0.018903	0	0	0	0	0	0	0	0	0	0	0	0.015396	0	0	0	0
BX324167.1	0	0	0	0	0	0	0	0	0	0	0	0	0	0	0	0	0	0	0	0	0	0	0	0	0	0	0	0	0	0	0	0	0	0	0.0199517	0	0.0204193	0	0	0	0	0	0	0	0	0	0	0	0
AL358074.1	0.00851775	0	0	0	0.00586339	0	0	0	0.00641381	0	0	0	0.0134839	0.0151382	0.0369579	0	0	0	0	0	0.0127751	0	0	0.00885265	0	0	0	0.00661554	0	0	0.0174036	0	0	0	0	0	0	0	0.0119268	0	0.0135592	0	0.00772953	0	0	0.00776865	0.00638743	0	0
AL391704.1	0	0.00571804	0	0	0	0	0.00452577	0	0	0	0	0	0	0	0	0	0	0	0	0	0.0356585	0	0	0	0	0	0	0.00461639	0	0	0	0	0	0	0	0	0	0	0	0	0	0	0	0	0.273851	0	0	0	0
AC092807.1	0	0.0768012	0	0	0	0	0	0	0	0	0	0	0	0	0	0	0	0	0.0690101	0	0.119736	0	0	0	0	0	0	0	0	0.0598325	0	0	0.071683	0	0	0	0.0644608	0	0.0558921	0	0	0	0	0	0	0	0	0	0
AL513548.3	0.00518132	0	0	0	0.00356668	0.00554172	0.0118357	0	0	0	0.00718634	0	0	0	0	0	0	0	0.00895779	0	0.00777108	0	0	0	0	0	0	0	0	0	0.00352885	0	0.00465237	0	0	0	0.0125509	0	0	0.00987467	0	0	0	0	0	0	0.00388546	0	0.00401224
AC005520.3	0	0	0	0	0	0	0.0837879	0	0.0414297	0	0	0	0.0870987	0.0488924	0	0.193476	0	0	0.095122	0.0449388	0	0	0.0641191	0	0	0	0	0	0	0	0	0	0	0	0	0	0	0	0	0	0	0.104719	0.0499286	0	0	0	0	0	0.127817
GAS1RR	0.0046404	0.0178567	0.0103414	0.0104231	0.0287489	0	0	0.0118677	0.0104826	0.00822732	0.0193083	0.0201723	0.00367296	0.0247415	0	0.00815887	0.052534	0.0126819	0	0.0151606	0	0.0446783	0.0162234	0.00964569	0.0228687	0.0239639	0.1005	0.0288327	0.00445171	0.0278227	0.0126418	0.0247054	0.0208333	0.0120246	0.00732216	0.00320562	0.0187343	0.0448	0.016244	0	0.00738696	0.0441601	0.0926416	0.0235638	0.010181	0.0169292	0	0	0.00718673
AL158071.3	0.0402321	0.154817	0.149432	0.0301226	0.0553893	0	0.275705	0.102892	0.151472	0.0713305	0	0.0499694	0.254755	0.0357514	0.989196	0	0.130134	0.0733009	0.556445	0.0328604	0.271535	0.22596	0.187542	0.0418139	0.0283243	0.0415532	0.469179	0.0312473	0.115788	0	0.0822028	0	0.180624	0.034751	0.158707	0.0277926	0	0.0554877	0.0281669	0.15335	0	0.0382867	0	0.0291854	0.353074	0	0.0301699	0	0.155772
AC007952.7	0	0	0	0	0	0	0	0	0	0	0	0	0	0	0	0	0	0	0	0	0	0	0	0	0	0	0	0	0	0	0	0	0	0	0	0	0	0	0	0	0	0	0	0	0	0	0	0	0
AC084116.1	0	0.0400497	0	0	0	0	0	0	0	0.0369052	0	0	0	0	0	0	0	0.0379246	0	0	0	0	0	0	0	0	0	0	0	0.031201	0	0	0	0.0359591	0	0	0	0	0	0	0	0	0	0	0	0.0379695	0	0	0.0322374
AL354950.1	0	0	0.159745	0.0268345	0.074015	0	0.10916	0	0.0269877	0.0953167	0	0.044515	0	0.0636978	0.0259183	0.15754	0.0579644	0.0326499	1.1773	0	0.268773	0.143782	0.0835354	0.0744994	0	0.111052	0.0597094	0.055673	0.790813	0.0805842	0.02441	0	0.225271	0	0.33932	0.0495177	0	0.0494309	0.10037	0	0	0	0.0325239	0.0259996	0.0262112	0	0.0268767	0.144114	0.0277537
AL022313.4	0	0	0.0221738	0	0.00684922	0	0.00757613	0	0	0	0	0	0	0	0	0.00874706	0	0	0	0	0	0	0	0	0	0	0	0	0	0	0	0	0	0	0	0	0	0	0	0	0	0	0	0	0	0	0	0	0
AC012572.1	0	0	0	0	0	0	0	0	0	0.090915	0	0	0	0	0	0	0	0	0	0	0	0	0	0	0	0	0	0	0	0	0	0	0	0	0	0	0	0	0	0	0	0	0	0	0	0	0	0	0
AC107958.2	0	0	0	0	0	0	0.0261837	0	0	0	0	0	0	0.0305577	0	0	0	0	0	0	0	0	0	0	0	0	0	0	0	0	0	0	0	0	0	0	0	0	0	0	0	0.0327248	0	0	0	0	0	0	0
LINC00886	1.37421	0.51241	0.126615	0.271182	1.12563	0.216481	3.65821	0.113517	0.336901	0.306915	0.410008	0.287775	1.08771	0.506449	1.1825	0.0983324	0.430714	0.257167	0.460429	0.456796	0.115835	0.341887	0.477957	0.398578	0.269993	0.319074	0.310576	0.628805	0.25549	0.411172	0.174127	0.552972	0.578697	0.322052	2.64744	0.139821	1.99125	0.756648	0.827852	0.304534	0.474822	0.268648	2.15574	0.730276	1.33999	0.174886	31.5185	0.578268	0.886781
PRRT3-AS1	0.165777	0.223274	1.20685	0.322714	1.32375	0.567386	2.8275	0.42397	1.37312	0.352703	0.712776	0.22649	0.131215	0.265166	0.263741	0.204032	0.58984	0.63428	1.46169	0.487447	1.21832	0.957673	1.85465	0.137836	0.887004	0.342441	0.110472	0.334764	2.13108	0.844866	2.1678	0.308908	3.87018	0.171831	1.22944	0.503887	0.696051	0.640187	1.32311	0.252753	0.0527795	0.56794	0.120349	0.40888	1.13963	0.181437	0.671304	0.177757	0.308093
AC092803.1	0	0	0	0	0.117104	0	0	0	0	0	0	0	0.0897674	0.0503905	0.123021	0	0	0	0	0	0	0	0	0	0.0399223	0	0	0	0	0	0	0	0	0	0	0	0	0	0.0397005	0	0	0	0	0	0	0	0	0	0
AC091151.1	0	0	0	0	0	0	0	0	0	0	0	0	0	0	0	0	0	0	0	0	0	0	0	0	0.0197412	0	0	0	0.0538007	0	0	0	0	0	0	0	0	0	0	0	0	0	0	0	0	0	0	0	0
ARMC2-AS1	0	0	0.270045	0	0	0	0.1384	0	0	0	0	0	0	0	0.131443	0	0	0	0	0	0	0	0	0.377818	0.127965	0	0	0	0	0	0	0	0	0	0	0	0	0	0	0	0	0	0.164943	0	0	0	0	0	0
AL445489.1	0.0281959	0	0	0	0	0	0	0	0	0.0249953	0	0	0.200858	0	0.28546	0	0	0.0770574	0.0243734	0	0.0211444	0	0	0	0	0	0	0	0	0	0	0	0	0	0.0667361	0	0	0.0388875	0.0197403	0	0	0	0	0.020454	0	0.0514323	0	0	0
AC073263.2	0	0	0	0.00818144	0	0	0	0	0	0	0	0	0	0	0	0	0	0.00995445	0	0.00892505	0	0	0	0	0.00769303	0	0	0	0	0	0	0	0	0	0	0	0	0	0	0	0	0	0	0	0.0159828	0	0	0	0.00846167
LINC02563	0	0	0	0	0	0	0	0	0	0	0	0	0	0	0	0	0	0	0.0635292	0	0	0	0	0	0	0	0	0	0	0	0	0	0	0	0	0	0	0	0	0	0	0	0	0	0	0	0	0	0
AC022035.1	0	0	0	0	0	0	0.051327	0	0.101517	0	0	0	0	0	0	0	0	0	0	0	0.202202	0	0	0	0	0	0.112301	0.0523548	0	0	0	0	0	0	0	0.0465663	0	0	0	0	0	0	0	0	0	0	0.0505495	0	0
AC008991.1	0	0	0	0	0	0	0.0577309	0	0	0	0	0	0	0	0	0	0	0	0	0	0	0	0.176716	0	0.0533785	0	0	0	0	0	0.464744	0	0.0680788	0	0	0	0.0306099	0	0	0	0	0	0	0	0	0.0345755	0.0568565	0	0
AL356310.1	0.034799	0	0.0258505	0	0.0239547	0.0744391	0.105988	0	0.0262034	0	0.0241326	0.0432214	0.13772	0	0	0.0305923	0	0	0	0	0.182673	0	0	0	0	0	0.115948	0	1.43551	0.130404	0	0.0463173	0	0.0601163	0.0549099	0	0.0561966	0	0	0	0	0	0	0	0	0.0952157	1.06992	0.0466422	0
AP002812.5	0.0571838	0.027506	0.0637185	0.0214073	0.0590456	0	0.195937	0.0243743	0	0	0.0198281	0	0.045262	0.0254076	0.124058	0.0251355	0.138724	0.0260465	0.197726	0.0934122	0.0857656	0.0917621	0.0999609	0.029716	0.0402588	0.0590615	0	0.0222067	0.0548585	0	0.0389462	0	0.077019	0	0.0676734	0	0.0230864	0	0.040035	0	0.0455149	0.0544187	0.0778381	0.0207413	0.0627301	0.0260773	0.0857638	0.0383226	0
LINC01479	0	0.0547813	0.0211504	0	0	0	0.0867175	0	0.0214392	0	0	0.035363	0	0	0	0	0	0	0	0	0	0.0228443	0	0	0	0	0	0	0	0	0	0	0	0	0.0224632	0	0	0	0	0	0	0	0	0	0.0416446	0	0	0	0
H19	2.4573	51.4253	8.40438	75.1688	10.6552	89.0591	10.76	11.5246	2.64798	17.6633	201.109	148.23	5.64677	13.2491	0.656608	58.2317	250.291	111.586	1277.67	29.4996	14.7313	113.335	17.6524	153.879	0.740704	40.4962	14.0822	69.625	1.92877	15.8298	293.866	42.25	1.42998	11.8015	19.66	28.1758	52.9608	31.3864	8.33959	16.8787	1.38803	100.658	4.15247	45.213	3.3096	122.365	4.38795	135.086	26.4669
FO680682.1	0.059007	0.113532	0	0	0	0	0.0449297	0	0	0	0.0409205	0	0.140115	0	0	0	0	0	0.0510075	0.0481953	0	0	0.0687654	0	0.0415424	0	0	0.0458294	0	0	0	0	0	0	0.0465541	0	0	0	0	0	0	0	0.0535466	0	0	0	0.0442492	0	0
AC026741.1	0	0.0812627	0	0.0632449	0	0.0451731	0.0321593	0	0	0	0	0	0.03343	0.075063	0.0305427	0	0.0683066	0	0.255566	0	0.126691	0.0338872	0.14766	0	0.0594694	0	0	0.0656064	0.0810358	0	0	0	0	0.0364814	0	0	0	0	0.0295695	0	0.0672336	0	0.0766539	0	0	0	0	0	0
AC008514.1	0.0683709	0.0164436	0.101579	0.0127977	0	0	0	0.0145714	0.0900949	0	0.0355606	0.0424593	0.0135292	0.0303781	0.0247214	0.0300529	0.110575	0	0	0	0.012818	0.0274285	0.0597583	0	0.0481347	0	0.199332	0	0	0	0.0349241	0	0	0	0	0	0	0.0471482	0.0598341	0.0325756	0	0	0	0	0.0125004	0.0155895	0.0128178	0.0458198	0.092652
AC245884.11	0	0.0112943	0	0.0703207	0	0	0	0.0200167	0.00884025	0.0624451	0.0162832	0	0	0.0312979	0	0.0619256	0.094936	0.06417	0.0101485	0.0287671	0	0.0753571	0.0410451	0.0244035	0.00826535	0	0.0195588	0.0364732	0.0112628	0.0175978	0	0	0	0.0101407	0	0.048661	0	0.0161919	0	0	0	0.0111725	0.0319612	0.0170332	0.0085859	0.0214153	0.0264117	0	0.00909117
AL359853.3	0	0	0	0	0	0	0	0	0	0	0	0	0	0	0	0	0	0	0	0	0	0	0	0.0336372	0	0	0	0	0	0	0	0	0	0.0279555	0	0	0	0	0.0226589	0	0	0	0	0	0	0	0	0	0
AC004947.1	0.00732018	0.0140844	0	0	0	0.00782935	0	0	0	0	0	0.00454594	0	0.0195148	0	0	0	0	0.00632779	0.00597892	0	0.0058733	0.0170615	0	0.0154608	0.0226817	0.0243904	0.0113708	0	0.00548626	0.00498557	0.00974312	0	0	0.0346519	0.00505683	0	0	0.0358746	0	0.0349586	0	0	0	0.0428276	0.0066764	0	0	0.00566849
LINC01170	0	0	0	0	0	0	0.0306642	0	0	0	0.013964	0	0.0159379	0	0	0.0354035	0	0	0	0	0	0	0.0938637	0.0209276	0.0141762	0	0	0	0	0	0.0959981	0.0536016	0.216963	0	0	0	0	0	0	0	0	0	0	0	0	0.0183651	0.0150999	0	0.0311851
AC079298.2	0	0	0	0	0	0	0	0	0	0	0	0	0	0	0	0	0	0	0	0	0	0	0	0	0	0	0	0	0	0	0	0	0	0	0	0	0	0	0	0	0	0	0	0	0	0	0	0	0
AL929236.1	0.0393	0	0.0583882	0.0294247	0	0	0.149621	0.0670058	0	0	0.054508	0	0	0	0	0.0690984	0	0	0	0	0	0	0	0	0.0276682	0	0	0	0.037702	0	0.0267661	0	0	0	0.124024	0	0.0634653	0	0.110058	0	0	0	0	0	0.0287412	0	0.0884129	0	0
AC087260.1	0	0	0	0	0	0	0	0	0	0	0	0	0	0.0902254	0	0	0	0	0	0	0	0	0	0	0	0	0	0	0	0	0	0	0	0	0	0	0	0	0	0.0967521	0	0	0	0	0	0.0463019	0	0	0
AC092138.2	0	0	0	0	0	0	0	0	0	0	0	0	0	0	0	0	0	0	0	0	0	0	0	0	0	0	0	0	0	0	0	0	0	0	0	0	0	0	0	0	0	0	0	0	0	0	0	0	0
AC008875.1	0.401626	0.0241483	0.0186468	0	0.120955	0	0.248471	0	0.0189014	0	0	0.0155885	0.0794735	0	0.0907618	0	0.0811931	0	0.303781	0	0.18824	0.0805605	0.175517	0	0.0530165	0	0.167275	0	0.0722428	0	0.034192	0	0.0450781	0	0.0198041	0.0173404	0.0608046	0	0.017574	0	0	0	0.0227788	0	0.036715	0.0457881	0.0752945	0.0336445	0.0777513
AC013714.1	0	0	0	0	0	0	0.0207507	0.0232323	0.0205208	0	0	0	0	0	0	0	0	0	0.0235577	0	0	0	0	0	0.0191862	0	0.0454015	0	0	0	0	0	0	0	0.0215009	0	0	0	0.0190796	0	0	0	0	0	0	0	0.0408727	0	0
AC008040.1	0.00255201	0	0	0	0.00175674	0.00545905	0	0	0.00576495	0.00226233	0.00176979	0	0.00403993	0.00226779	0.003691	0	0	0.00232483	0.00220604	0	0	0.00204759	0.00594812	0	0	0.00263582	0.00425159	0.00198209	0	0.00191266	0	0	0	0	0	0.00176295	0.00618184	0	0	0	0	0	0.00463171	0	0.00373272	0	0.00191375	0.00342054	0
AC073333.1	0.0314158	0	0.0466745	0	0.0648773	0	0.143526	0.0535633	0.0473117	0.0835492	0.0653591	0	0	0	0.0227185	0	0.0508083	0	0.0271568	0.0256595	0	0	0.0366112	0.032651	0	0.0324474	0	0	0	0.0706356	0	0	0.0282086	0	0.148714	0.0651066	0.0507331	0	0	0.0598728	0	0.0298967	0.0855259	0	0.183802	0	0.0235586	0	0
AP000708.1	0.0118945	0.0114428	0.00441792	0	0.00409392	0	0.00452841	0.0101399	0.00895647	0.00527217	0	0	0.0282441	0.00528489	0.0129023	0	0.0096184	0.0054178	0.00514098	0	0	0	0.00693078	0.00618108	0.00837401	0	0	0	0.0741704	0	0.008101	0	0.0106802	0.00513702	0.00938426	0.00410839	0.00480208	0	0.00416374	0	0.0189346	0.00565967	0	0	0.00434938	0.00542421	0.00891964	0.00797127	0.00460534
EGFLAM-AS2	0	0.0524346	0	0	0	0	0	0	0	0	0	0	0	0	0	0	0	0	0	0	0	0	0	0	0	0	0	0	0	0	0	0	0	0	0	0	0	0	0	0	0	0	0	0	0	0	0.0204364	0	0
AC005486.1	0.188495	0	0	0	0	0	0	0	0	0	0	0	0	0	0	0.0828541	0	0	0	0	0	0	0	0	0.132705	0	0	0	0	0	0	0	0	0	0	0	0.0760996	0	0	0	0	0	0	0	0.206777	0.0859586	0.141351	0	0
AC104170.1	0.128303	0.987444	0.0953101	1.18478	1.17761	0.54891	0.748986	0.437508	1.25595	0.909914	1.12703	1.19517	0.643176	1.21615	2.0103	0.526367	0.415006	0.740247	2.25515	0.698629	0.609368	0.446087	1.14633	0.311145	0.150547	0.795097	0.498749	0.465034	0.205143	0.480797	0	0.740006	0.384016	0.591059	0.337419	0.502251	0	0.530863	0.509017	0.733568	0.272324	0.488396	1.63002	1.20997	0.344049	1.05317	1.92428	1.03181	0.0331178
AL049835.1	0	0	0.0294213	0.0296537	0	0.0423607	0	0.303872	0	0.0351102	0.0274661	0.0737875	0	0	0.0286412	0.0348181	0	0.03608	0.0684731	0	0	0	0	0	0	0.0409064	0	0	0.0759908	0	0	0	0	0	0	0	0	0	0	0	0.0630478	0.0376908	0	0	0	0	0	0	0
AL354696.1	0.65537	0.39405	0.212993	0.0920041	0.225569	0.131429	0.530207	0.244429	0.215901	0.689911	0.5113	0.71224	0.551158	0.109196	0.918247	0.144036	0.39747	0.261199	0.283261	0.167277	0.614337	0.723019	0.906956	0.0851422	0.173024	0.253834	0.136479	0.318132	0.510836	0.429783	0.251074	0.32711	0.257453	0.141521	0.710957	0.0848875	0.496102	0.282463	0.544863	0.156127	0.391226	0.66266	0.371702	0.356566	1.28809	0.336225	0.430027	0.109801	0.729525
ASTN2-AS1	0	0.0446112	0	0.00867997	0.00798035	0	0.00882731	0.0296489	0	0.0102771	0.00803962	0.0143989	0.100937	0	0.0167672	0	0	0	0	0.00946889	0	0.00930162	0.0135103	0.0722933	0.040809	0.0359212	0	0	0.0111217	0.0347546	0	0	0	0.0100137	0	0	0.0280823	0.0159891	0.0162329	0	0	0	0	0.00840991	0	0.0317205	0	0	0.00897727
AL357054.4	0.0144687	0.069596	0.0913586	0.0920804	0.0697189	0.0232126	0	0.0493376	0.12529	0.0448921	0.115389	0.143764	0.0916177	0.167145	0.00523154	0.0572383	0.0351	0.0593128	0.212622	0.112267	0.092227	0.220568	0.143322	0.0827065	0.0509315	0.104606	0.180783	0.230368	0.104103	0.0379534	0.0591252	0.067402	0.136412	0.0812339	0.0399531	0.0499752	0.08762	0.0299326	0.0759727	0.0827241	0.161227	0.302919	0.118168	0.125951	0.174592	0.0989716	0.0868001	0.174535	0.196071
C16orf97	0	0	0	0	0	0	0	0	0	0	0	0	0	0	0	0	0	0	0	0	0	0	0	0	0	0	0	0	0	0	0	0	0	0	0	0	0	0	0	0	0	0	0	0	0	0	0	0	0
TMEM9B-AS1	0.981081	0.235955	2.03022	0.642736	0.687409	0.131165	0.426871	0.17922	0.712363	0.450389	0.619618	0.620146	0.457605	0.653862	0.89951	0.508248	0.255004	0.574548	0.772355	0.286185	0.302173	0.688768	2.38874	0.655492	1.3074	1.03139	0.8756	1.37429	0.773118	0.971634	1.00228	0.816133	0.330346	0.499374	1.93508	0.54461	1.06094	0.579899	1.09163	0.801327	0.167332	0.350115	0.937988	0.915044	0.640617	0.591206	1.432	0.610523	0.881812
AC103409.1	0	0	0	0	0	0	0	0	0.0183801	0	0	0	0	0	0	0.0214586	0	0	0	0	0	0	0	0	0	0	0	0	0	0	0	0	0	0	0	0	0	0	0	0	0	0	0	0	0	0	0	0	0
AC012447.1	0	0	0.0221738	0.022349	0.0205477	0.0957775	0.0454568	0	0	0.079384	0.103501	0.018537	0.0945059	0.0265252	0.0431717	0.0262412	0	0	0	0.0731409	0.0223846	0.0718489	0.069572	0.0620464	0.0210148	0.123319	0.0497286	0.046367	0	0	0.121978	0.0397296	0	0	0.0706502	0.0618608	0.0241019	0	0.10449	0.113776	0	0	0	0.064961	0.0218298	0.0272244	0.0447682	0.0400083	0.0231145
AL354714.3	0	0	0	0.0265079	0	0	0	0	0	0	0	0	0	0.0314612	0	0	0	0	0	0.0289172	0	0.0284063	0	0	0.0249254	0	0	0.0274976	0.0339646	0	0.0241128	0.0471228	0	0.0305809	0	0.0489149	0	0	0.0247869	0	0	0	0	0	0.0258921	0	0	0	0
AC010745.1	0	0	0	0	0	0	0	0	0	0	0	0	0	0	0	0	0	0	0	0	0	0	0	0	0	0	0	0	0	0	0	0	0	0	0	0	0	0	0	0	0	0	0	0	0.0701159	0	0	0	0
AC015726.2	0.333728	0	0	0	0.22973	0	0.127055	0	0.251295	0	0	0.103625	0	0	0	0	0	0	0	0	0	0	0	0	0	0.172343	0	0	0.480237	0.12506	0.340939	0	0.599317	0	0	0	0	0	0.116824	0	0	0	0.151423	0.121048	0	0.152189	0	0.223653	0
AL354977.1	0.0899444	0	0.0222718	0	0	0	0.0684864	0	0	0	0	0	0	0.0266424	0.0433625	0	0.0969773	0	0	0	0	0	0.104819	0.0311603	0	0	0	0	0	0.0224702	0	0	0	0	0	0	0	0	0	0	0	0	0.027207	0	0.131558	0	0.044966	0	0
AP001453.1	0.154957	0	0	0	0.026667	0	0.0294972	0	0	0.0171709	0.0134325	0	0.0459941	0	0.0420216	0.0170281	0.0313262	0.0176452	0.217667	0.0158205	0.029051	0.0310821	0.0451457	0.0201311	0.0545466	0	0.0322692	0.0150439	0	0.0580677	0.0395762	0.0257808	0	0.0167307	0.0458454	0	0.0312798	0	0.0678044	0.110745	0	0.018433	0.0527315	0	0.028331	0	0.0145252	0	0.0299983
AL591074.1	0	0	0	0	0	0	0.0388978	0	0	0	0	0	0	0	0	0	0	0	0	0	0	0	0	0	0	0	0	0.0198383	0	0	0	0	0	0	0	0	0	0	0	0	0	0	0	0	0	0	0	0	0
AC122136.1	0	0	0	0	0	0	0.0324284	0	0	0.0377544	0	0	0	0	0	0	0	0	0	0	0	0	0	0	0.0299835	0	0	0	0	0	0	0	0	0	0	0	0	0	0	0	0	0	0	0	0	0	0	0	0
LINC01415	0.0147732	0.0142121	0.0365809	0.014748	0.0508472	0.0105338	0.00374958	0.0251879	0.00370803	0.0130962	0.0409799	0.00917436	0.0311819	0.0175038	0.0106833	0.0173164	0.0238924	0.02243	0.021284	0.0160884	0.00738572	0.0474126	0.0401714	0.015354	0.0277351	0.00508609	0.0492234	0.00382466	0.00472415	0.00738137	0.0201232	0.039326	0.00884333	0.0127605	0.0543919	0.0136072	0.0159047	0.0135833	0.0517144	0.01877	0.0156781	0.0234314	0.0312809	0.0285782	0.0288107	0.00898262	0.0184639	0.00660031	0.0190664
AL035665.1	0	0	0	0	0.0335854	0	0.00928745	0	0.0183691	0	0	0	0	0.0433557	0	0.0536144	0	0.0111115	0.0210876	0.00996248	0	0.0587189	0.0142145	0	0	0	0.040641	0	0	0.00914157	0	0.0162346	0	0	0	0.00842602	0.00984872	0	0.0256186	0.046492	0.0194168	0	0.0110687	0.00884829	0.178406	0.0111247	0.00914677	0	0
AC104237.1	0	0	0.0280566	0	0	0	0	0	0	0	0	0	0	0	0	0	0	0	0.0326486	0	0	0.0303036	0	0	0	0	0	0	0	0	0	0	0	0	0.0297981	0.026091	0	0	0	0.0719807	0	0	0	0	0	0	0	0	0
AC008406.2	0	0.0368126	0	0	0	0	0	0	0	0	0	0	0.0302881	0	0	0	0	0	0	0	0	0	0	0	0	0	0	0	0	0	0	0	0	0	0	0	0	0	0	0	0	0	0	0	0	0	0	0	0
AL049749.1	0	0	0	0	0	0	0.0245265	0	0	0	0	0	0	0	0	0	0	0	0	0	0	0	0	0	0	0	0	0.0250176	0	0	0	0	0	0	0	0	0	0	0	0	0	0	0	0	0	0	0	0	0
DLGAP1-AS5	0.00707346	0	0	0	0	0	0.00538595	0	0	0	0	0	0.0167963	0	0	0	0	0	0.0183435	0	0	0.0113507	0	0	0	0.00730573	0	0	0	0	0	0	0	0	0	0	0	0	0	0	0	0	0	0.00513127	0.460399	0	0	0	0.00547744
AL451074.2	0.0946857	0.00910898	0.11254	0.0212679	0.215091	0.0101272	0.108145	0.00807186	1.06234	0.0251813	0.0131326	0.0117602	0.472156	0.0336562	0.280737	0.0332958	0.0306268	0.0172513	0.237363	0.0386683	0.071006	0.0455823	0.09931	0.0196817	0.259978	0.0391179	0.0473231	0.0220621	0.0726684	0.00709641	0.199912	0.0504105	0.0680155	0.0408931	0.164347	0.00654095	0.198779	0	0.232017	0.108272	0.0150728	0.0180214	0.0601466	0.027475	0.0276985	0.0431792	0.305319	0.012691	0.0806534
AC007552.2	0.0337602	0	0	0	0.0232396	0	0.0514121	0	0.228791	0	0	0.0209656	0.133609	0.0300003	0.244139	0	0	0	0.0583668	0	0	0.0812619	0.0393434	0.0350876	0.0713041	0	0	0.0262208	0	0	0.275918	0	0	0	0.399531	0	0.136298	0.0465618	0.0472719	0	0	0	0.0612723	0.122453	0.0493796	0	0	0.0452499	0.156857
AC004921.1	0.138864	0.320616	0.20631	0.540645	0.114708	0.148523	0.190323	0.0710279	0.146389	0.443164	0.32742	0.293204	0.241809	0.370195	0.080336	0.292985	0.494081	0.303604	0.216068	0.272208	0.208271	1.76038	0.258926	0.259782	0.136869	0.143424	0.323881	0.323557	0.186504	0.270593	0.170237	0.554481	0.324187	0.311858	0.0876461	0.498825	0.04485	0.0383039	0.174996	0.264649	0.132633	0.158579	0.0252027	0.141029	0.507774	0.253302	0.166613	0.297797	0.3441
AL021395.1	0	0	0.0135507	0	0	0	0	0	0	0	0	0	0	0.0162098	0	0	0	0	0	0.00744954	0	0.00731794	0	0	0	0	0	0	0	0	0	0	0	0.0157563	0	0	0	0	0	0	0	0.0173594	0	0	0	0	0	0	0
DLEU2L	0.0801699	0.0220358	0.00850775	0.0128625	0.00788383	0.00612473	0.0218013	0	0.103487	0.0152292	0.00397119	0	0.0362605	0.0101773	0.0331287	0.00503418	0.00926126	0	0.0346506	0.00935436	0.00429431	0.0551347	0.0200203	0	0.00806307	0	0.0667804	0.0177903	0	0.0171671	0	0	0	0.00494628	0.0225895	0.0118675	0.00924755	0.00789783	0.0160365	0.0218271	0	0.0163486	0	0.00415409	0.0418789	0.0104456	0.0343538	0.0230259	0.0177374
CXXC4-AS1	0	0	0.0101904	0.00513545	0	0	0	0.0058472	0.00516476	0	0	0.0255571	0	0	0	0.00602982	0	0	0	0	0	0	0	0	0	0	0	0	0	0	0	0	0.00615875	0.00592453	0.00541144	0	0.00553825	0	0	0	0	0	0	0	0	0	0	0	0
AC078850.1	0.0125431	0.0362002	0.0186353	0.00939126	0.0172686	0.0134155	0.0477534	0.0213857	0.00944486	0	0	0.00778944	0.00992807	0	0.00907059	0.0110268	0.101429	0.0228529	0	0	0	0.0100639	0	0	0.0176613	0	0.0417929	0.00974193	0.012033	0.00940067	0.0170855	0	0.0112626	0	0.158335	0	0.0101279	0.0172993	0	0	0	0.0119366	0.0113824	0	0.366924	0	0.028218	0	0.00971293
LINC02010	0	0	0	0	0	0	0	0	0	0	0	0	0	0	0.00777684	0	0	0	0.0185923	0	0	0	0	0	0	0	0	0	0	0	0	0	0	0	0	0	0	0	0	0	0	0	0	0	0	0	0	0	0
AC114271.1	0.390793	0.097469	0.161278	0.124624	0.244103	0.0774029	0.242458	0.0740327	0.16348	0.109062	0.100374	0.0898846	0.876405	0.173635	0.502407	0.0699827	0.0936332	0.0395559	0.650604	0.100485	0.450445	0.174195	0.227711	0.165472	0.157944	0.134542	0.253186	0.207967	0.242992	0.157292	0.182368	0.144484	0.175449	0.0937648	0.0628058	0.13998	0.251267	0.0898297	0.440798	0.0689612	0.276487	0.137739	0.604184	0.257242	0.672154	0.191413	0.276774	0.223097	0.151308
LINC00621	0	0	0	0	0	0	0.289734	0	0	0	0	0	0	0	0.0375231	0.0304104	0	0	0	0	0	0	0	0	0	0	0	0.0134334	0	0	0	0	0	0	0	0	0	0	0	0	0	0	0	0	0.0126491	0	0	0.0231824	0.0267869
AC010280.1	0	0.921614	0	0.403465	0	0.832513	0.273543	0.459384	0.135256	0.424627	0.207611	0.818029	0.142176	0.266032	0.0432987	0.631641	0.193669	0.490901	0.362303	0.635753	0.942918	0.432361	0	0.373373	0	0.247363	0.598499	0.0930067	0.0574401	0.403869	0.122337	0.79693	0	0.310306	0.0944774	0.0413619	0.145037	0.247736	0.0838381	0.570553	0	0.740735	0.326004	0.912129	0	0.273045	0	0.240756	0
AL627309.1	0	0	0.0892903	0	0	0	0.141445	0.00465767	0.00411406	0	0	0	0.00432454	0.00485512	0	0	0	0	0	0	0	0.00876739	0	0	0.00384652	0	0	0	0.0314487	0.0655171	0	0	0	0.00471928	0.0172423	0	0	0	0.0114754	0	0	0	0	0	0.0958966	0	0.0163886	0	0
AC008164.1	0	0	0	0	0	0	0	0	0	0	0	0	0.0453895	0	0	0	0	0	0	0	0	0	0	0	0	0	0	0	0	0	0	0	0	0	0	0	0	0	0	0	0	0	0	0	0	0	0	0	0
AC026336.2	0	0	0	0	0	0	0	0	0	0	0	0	0	0	0	0	0	0	0	0	0	0	0	0	0	0	0	0	0	0	0	0	0	0	0	0	0	0	0	0	0	0	0	0	0	0	0	0	0
LINC01859	0	0	0	0	0	0	0	0	0	0	0	0	0	0	0.0143765	0	0	0	0	0	0	0	0	0	0	0	0	0	0	0	0	0	0	0	0	0	0	0	0	0	0	0	0	0	0	0	0	0	0
AC106047.1	0.38019	0.931003	0.616198	0.207022	0.11896	0.221801	0.552659	0.235715	0.0520509	0.183837	0.143812	0.193176	0.27357	0.460701	0.724831	0.850767	0.223591	0.157429	0.567664	0.592827	0.311028	0.360505	0.684735	1.72424	0.559658	0.392674	0.115161	0.0805321	0.397887	0.518074	0.612031	0.782047	1.11723	0.716496	0.299954	0.358142	0.055815	0.0476685	0.532351	0.329351	0.275098	0.164457	0.0313643	0.075218	0.808853	0.661984	0.155511	0.0926508	0.0802924
AC110760.1	0	0	0	0	0	0	0	0	0	0	0	0	0	0	0	0	0	0	0	0	0	0.0276841	0	0	0	0	0	0	0	0	0	0	0	0	0	0	0	0	0.096627	0	0	0	0	0	0	0	0	0	0
MEIS1-AS3	0	0.0554011	0.0213897	0.0215587	0	0	0	0.0245467	0	0	0	0	0	0	0	0	0	0	0	0	0	0	0	0	0	0	0	0	0	0	0	0	0	0	0	0	0	0	0	0	0	0	0	0	0	0	0	0	0
AC018904.2	0	0	0.00860702	0.00867502	0.0159516	0.0123924	0.00882229	0.00987734	0.0174491	0	0.0160701	0	0.00917089	0	0.0837881	0	0	0	0.0300471	0.0094635	0	0	0	0	0	0	0	0	0.0111153	0	0.0236736	0	0	0	0	0	0.00935544	0	0.0243355	0.0441634	0	0.0220524	0	0	0	0.021135	0.00868865	0	0
AL356966.1	0.0224016	0.0053877	0	0	0	0	0.0639646	0.00477428	0.0379535	0	0.0271865	0.0695586	0.0177312	0.00995334	0.0566993	0	0.0181149	0.030611	0.0193646	0.00914849	0.0713967	0.0179738	0.215377	0.0116412	0.0236569	0.00578429	0.0839709	0.0043497	0.00537267	0.0167893	0.00762854	0.00745409	0	0	0.110462	0.0270815	0.0226101	0.00772401	0.0196045	0.0213467	0.00891515	0	0.0203286	0.012188	0.0163829	0.0204314	0.0167989	0	0.0216837
AC016727.1	0.829645	0.728301	0.778082	0.520232	0.935185	0.743158	1.08971	0.300587	0.515392	0.551603	0.553771	0.734192	1.05889	0.838618	1.13243	0.811405	0.352216	0.349552	0.86957	0.677631	0.769925	0.76551	0.809736	0.592807	0.876135	1.07111	0.259156	0.314129	0.994887	0.559615	0.423786	1.38032	0.744948	0.671829	2.29913	0.451335	0.644773	0.672241	0.464676	0.691755	0.445735	0.611885	1.09166	0.95543	0.417136	0.879642	1.25207	0.694999	0.473806
AC092115.3	0	0	0.280993	0	0.0236715	0	0.0523674	0	0.103574	0.0304842	0	0.0213552	0.0544367	0	0	0	0	0	0.0891769	0	0	0.0275906	0	0	0.145258	0	0.0572887	0	0	0	0	0	0.463155	0	0.406955	0	0	0	0	0	0	0	0	0	0.0754457	0.0627266	0.412594	0	0.798856
AC018697.1	0	0	0	0	0	0	0	0	0	0	0	0	0	0	0	0	0	0	0	0	0	0	0	0	0	0	0	0	0	0	0	0	0	0	0	0	0	0	0	0	0	0	0	0	0	0	0	0	0
U91328.3	0	0	0.0292505	0.0294817	0.189738	0.0842299	0.299821	0	0.0592998	0.0698129	0	0.0489063	0.124667	0.0699814	0.1139	0.103848	0	0.0358707	0.272303	0.0321613	0.354343	0	0.22944	0	0.0554434	0	0.0655995	0.0305825	0.188875	0	0.0268179	0	0.141425	0.0340116	0.0310661	0	0.127176	0.0543071	0.0275677	0.0750437	0.125364	0	0	0	0.0863904	0.107739	0.0885839	0	0.0914744
AC023034.2	0	0	0	0	0	0	0	0	0	0	0	0	0.101554	0	0.0618553	0.112793	0	0	0.258788	0	0	0	0.0498405	0.0444492	0	0	0.0712498	0.0664334	0	0	0	0	0	0	0.101226	0	0	0	0.0598844	0.0815075	0	0.0406997	0	0	0	0	0	0	0
SEC23A-AS1	0	0	0.0302451	0.030484	0.056054	0	0.0930046	0	0	0.0360933	0.0282351	0	0.064453	0	0.0588863	0.071586	0	0.0370903	0	0	0.0305326	0.0326673	0.142344	0	0	0.0420518	0	0.0632446	0.234356	0	0.0277297	0	0.0731167	0	0	0	0.032875	0.0561535	0.028505	0	0	0	0.0369472	0	0.0297759	0	0.0610638	0	0
AC011247.1	0	0	0.102642	0	0.0396309	0	0.0263022	0.0294477	0.112713	0.0204147	0.00798505	0.0071506	0.373667	0.020464	0.699441	0.0202449	0	0.0209787	0.318508	0.0282139	0.189965	0.0369539	0.0670929	0.0119671	0.0162128	0.0475699	0.0191826	0.0268289	0.0441847	0.0258891	0.0470527	0.0153256	0.0516945	0.00994571	0.0817593	0.039771	0.0278917	0.0158805	0.0806136	0.0219443	0.0549885	0.0547881	0.0208977	0.00835283	0.00842078	0.0105017	0.0259038	0.0154331	0.0624144
AC012617.1	0.0152262	0	0.0113108	0.00570008	0.0104813	0	0.0579684	0.00649009	0.0171978	0.00674893	0.00527957	0.0189114	0.0060259	0	0.148647	0	0	0	0.032905	0	0.0399641	0.00610832	0.0266164	0	0.0160794	0	0.0126832	0	0.0219106	0.0114116	0.0155552	0.010133	0.0273436	0	0.0120128	0	0	0	0	0	0.0727148	0.00724497	0.0483602	0.0110455	0.016703	0.0138871	0.00570904	0	0.017686
LINC00159	0	0	0	0	0.0244991	0	0	0	0	0	0	0	0	0	0	0	0.0575591	0	0	0	0	0.0285553	0	0	0	0	0	0.0276419	0.0682854	0	0	0	0	0	0	0	0	0	0	0	0	0	0	0	0.104112	0	0.0266887	0.0477022	0
AL022322.2	0.0049903	0.00768125	0.00667269	0.000747268	0.00274815	0.00426993	0.015959	0.00170167	0.00676379	0.00265431	0.00276856	0.00061981	0.0110597	0.00266071	0.0166003	0.00701927	0.00161415	0.00363684	0.00690203	0	0.00299383	0.00240236	0	0.0031119	0.00351329	0.00206167	0.00332548	0.00077517	0.0038299	0.0044881	0.00203925	0.00132841	0.00179234	0	0.00472456	0.000689466	0.00322352	0	0.00419252	0.00380424	0.0127103	0.0037992	0.00724561	0.00144804	0.0116785	0.000910284	0.0202079	0	0.0131387
AL035413.1	0.160611	0.386278	1.16327	0.150316	0.33168	0.38651	0.397455	0.0342298	0.181408	0.498329	0.334144	0.199483	0.222471	0.677936	0.667842	0.741275	0.389631	0.256047	0.937149	0.262365	0.331221	0.354379	0.842274	0.542508	0.678443	0.0414712	0.80272	0.155928	0.61632	0.0902798	0.355509	0.267215	0.180268	0.104047	0.760291	0.110951	0.0972634	0.221513	0.168668	0.229572	0.127837	0.191056	0.327933	0.291278	0.646025	0.219729	0.270993	0	0.310929
LINC01999	0	0	0	0.0471889	0	0	0	0	0.0237291	0	0.0218538	0	0	0	0	0	0	0	0	0	0	0	0	0	0	0	0.0524999	0.0489509	0	0	0	0	0	0.0272198	0.0248625	0.0217694	0	0	0	0	0	0	0	0.0914415	0	0.0574832	0.212684	0.0422379	0
AC135178.4	0	0	0	0	0	0	0.0282861	0	0	0	0	0.0230698	0.0294038	0	0	0	0	0	0	0	0	0	0	0	0	0	0	0	0	0	0	0	0	0	0	0	0.0299955	0	0	0	0	0	0	0	0	0	0	0	0
AP000897.2	0.0234397	0	0	0	0	0	0	0	0.026475	0.0103895	0.00812756	0	0	0	0	0	0	0	0	0.0191449	0	0	0.0136581	0	0	0.0121047	0	0	0	0	0.0399104	0.0155991	0	0	0	0	0.056779	0	0	0	0	0	0	0	0	0	0	0	0
AC009095.1	0.030705	0.0443084	0.0114046	0.0459789	0	0	0.105209	0.0261757	0.0578017	0.0680491	0.0212935	0.0190683	0.109366	0	0.0777157	0.0134966	0	0.0279716	0.0398135	0	0.011513	0.135498	0.12524	0.0159561	0.0108085	0.0158566	0.0511537	0.0119239	0	0.0230125	0.0313685	0	0	0.0132609	0.024225	0.0318168	0.0123963	0.021174	0.0107485	0.0292591	0.0488787	0.0584406	0.0139318	0.0111371	0.0336831	0.0140023	0.0230256	0.0411549	0.0356653
LINC01402	0	0	0	0	0.100455	0	0	0	0	0	0.101201	0	0.0577536	0	0.211062	0.0641451	0.472026	0	0.126148	0	0.0547179	0.292718	0.170065	0	0.0513696	0	0	0	0	0	0.0496949	0	0	0	0.0575669	0.10081	0.117832	0	0.153252	0	0.116153	0.0694375	0	0	0	0.0665486	0.0547167	0	0
ITFG2-AS1	0.321011	0.0772049	0.119232	0.100145	0.128902	0.143058	0.18332	0.114024	0.0604297	0.118572	0.0927567	0.166127	0.486997	0.166401	0.212795	0.141102	0.129792	0.0487389	0.300616	0.0655481	0.0802433	0.150244	0.187049	0.083408	0.113	0.165776	0.222831	0.207768	0.769894	0.220539	0.309728	0.284842	0.16814	0.0924258	0.147737	0.055439	0.194399	0.0368946	0.187286	0.152947	0.0851684	0.152744	0.364131	0.0970289	0.313019	0.0487965	0.240725	0.035855	0.20715
AC116348.3	0	0.0280176	0.0649036	0	0	0	0.0221756	0	0.0219299	0	0	0	0	0	0	0.025603	0.141304	0	0	0	0	0	0.03394	0	0	0	0	0	0.0279394	0	0	0	0.0261505	0.025156	0.0459547	0	0	0.0401671	0.0203898	0	0.0927227	0.0277154	0	0	0	0	0	0	0
LINC00492	0	0	0	0	0	0	0	0	0	0	0	0	0	0	0	0	0	0	0.0296755	0	0	0	0	0	0	0	0	0	0	0	0	0	0	0	0	0	0	0	0	0	0	0	0	0	0	0	0	0	0
AL592309.2	0	0.025735	0	0	0	0	0	0	0	0	0	0	0	0	0	0	0	0	0	0	0	0	0	0	0	0	0	0	0	0	0	0	0	0	0	0	0	0	0	0	0.0425842	0	0	0	0	0	0	0	0
AC106052.1	0.0409606	0	0	0.0613361	0	0	0.0623773	0	0.0616861	0	0	0	0.226947	0	0	0.0720181	0	0	0	0.0334555	0.245735	0.0328645	0.0954691	0	0	0	0	0.0318132	0	0.0306988	0	0	0.073558	0	0.0969486	0.0282958	0.0330735	0	0.114708	0	0.0652044	0	0	0	0	0	0.0307162	0	0.0317185
LINC00644	0	0.132775	0	0	0	0	0	0	0	0	0	0	0	0	0	0	0	0	0	0	0	0	0	0	0	0	0	0	0	0	0	0	0	0	0	0	0	0	0	0	0	0	0	0	0	0	0	0	0
AC022726.1	0.098345	0	0	0	0	0	0	0	0	0	0	0	0	0	0	0	0.318104	0	0.0850125	0	0	0	0	0	0	0	0	0	0	0	0	0	0	0	0	0	0	0	0	0	0	0	0	0	0	0	0	0	0
LINC00677	0	0.0335348	0.0258947	0	0	0	0.0530848	0	0.0787449	0	0	0	0.303503	0	0.0252082	0.0306447	0	0	0.0903985	0	0.0261409	0.0559371	0	0	0.0245413	0.0360032	0.17422	0.0270739	0	0	0.0237412	0	0.0312999	0	0	0.0240805	0.0562929	0.0480767	0	0.0664342	0.0554907	0	0.0316329	0.0505746	0.101972	0.0317929	1.15018	0	0
PAXIP1-AS1	5.1435	1.9185	4.23645	1.39854	4.06242	1.79515	2.68652	1.23851	1.67151	2.51181	2.0463	2.40405	7.02812	2.29335	3.18445	2.64957	1.95558	2.01399	2.50391	1.50354	2.95717	1.97654	4.56394	2.80416	2.31245	1.78012	1.71379	1.76614	5.84331	3.50999	4.17913	2.70236	1.34501	1.16136	2.24258	1.02855	1.56652	1.40633	4.38441	1.89173	2.39889	1.51996	5.37994	2.72314	3.21384	1.84354	2.8962	1.66907	1.22283
AC063926.1	0	0	0	0	0	0	0	0	0	0	0	0	0	0	0	0	0	0	0	0	0	0	0	0	0	0	0	0.0380991	0	0	0	0	0	0.0423711	0.0387016	0	0	0	0	0	0	0	0	0	0	0	0	0	0
AL158163.2	0	0.0559552	0.0648108	0.0653229	0.160154	0.0933147	0.0885758	0.0247921	0.0218986	0	0.0605039	0.126423	0.0920758	0.0258431	0.0210308	0	0.047034	0.0264931	0.201115	0.0475068	0.0654269	0.233338	0.237241	0.0302255	0.0614234	0.030037	0	0.0903494	0.251095	0.130777	0.0990347	0.0774161	0.0261131	0.02512	0	0.12054	0.211339	0.120329	0	0	0	0	0.0263908	0.0632906	0.085074	0.0795731	0.0654255	0.0389795	0
LINC02041	1.24131	0	0.553263	0	0.0569654	0	0.0630112	0	3.3649	0	0.172166	0.0513913	0.393006	0	0	0.21825	0	0.0753867	6.3666	0.0675909	3.90966	0.0663969	0.964393	0.172015	0.116521	0.170942	2.06798	0.0642729	1.74655	0.248086	1.23995	0.110145	0.371528	0.142959	2.28512	0	1.87094	0.114133	0	0	0	0.472514	0	0	0.968322	0.0754759	0	0.110917	0.38449
AL121782.1	0	0	0.0732326	0	0.033931	0	0.262725	0.168082	0.0371162	0.0436964	0	0.0612216	0.0390151	0.0876038	0	0	0	0	0.0426091	0	0.184822	0.118646	0.0574433	0	0.0694049	0	0	0	0	0.0369426	0.0335711	0	0	0	0.038889	0	0.199001	0	0	0	0	0	0.0447302	0	0.0360483	0.0449566	0.0369636	0	0.114509
AC023669.2	0	0.0819427	0	0	0	0	0	0	0	0	0	0	0	0	0	0	0	0	0	0	0	0	0	0	0	0	0	0	0	0	0.058012	0	0	0	0	0	0.0687762	0	0	0	0	0	0	0	0	0	0	0	0.0659585
AC020891.3	0	0	0.0416599	0	0	0	0	0	0	0	0	0	0	0	0	0.0493016	0	0	0	0	0	0	0	0	0	0	0	0.0871137	0	0	0	0	0	0	0	0	0	0	0	0	0	0	0	0	0	0	0	0	0
PRKX-AS1	0.0394524	0	0	0	0	0	0	0	0	0	0	0	0	0	0	0	0	0	0	0	0	0.0633087	0	0	0	0	0	0	0	0	0	0	0	0	0	0	0	0	0	0	0	0	0	0	0	0	0	0	0
LINC00924	0.356748	0.372408	1.6239	0.198908	0.694927	0.138012	0.13293	0.142356	0.428663	0.376812	1.62126	0.721203	0.258341	0.539603	0.120759	0.293604	1.22758	0.165952	0.459295	0.433973	0.705824	1.68696	0.362672	0.181443	0.165658	0.243029	0.606978	0.194544	0.538849	0.36977	0.578995	0.242466	0.4839	0.327815	0.137735	0.592514	0.140963	0.397807	0.435758	0.260386	0.507486	0.700666	0.261744	0.479045	0.477391	0.533059	0.421208	0.620591	0.411441
AC103853.1	0	0	0	0	0	0	0.0955363	0	0	0	0	0	0	0	0	0	0	0	0	0	0	0	0	0	0.0220834	0	0	0	0	0	0	0	0	0	0	0	0	0	0	0	0	0	0	0	0	0	0	0	0
LINC02163	0	0	0.210767	0	0.854482	0	1.83633	0	0	0	0	0	3.20019	0.031516	0.948951	0	0.0573585	0	3.67894	0.0289676	1.01066	0	0.619967	0	0	0	0.0590852	0	0.0340238	0	1.95654	0	0	0	0.363754	0	0.973651	0	0.869053	0	0.508117	0	0	0	0	0	0.452128	0	1.34571
AL136309.3	0	0	0.113703	0	0	0	0	0	0	0	0	0	0.0605762	0	0	0	0	0	0	0	0	0	0	0	0	0	0.1275	0.0594404	0	0	0	0	0	0	0	0	0	0.105552	0	0	0	0	0	0	0	0	0	0	0
RASA2-IT1	0	0	0	0	0.0228979	0	0	0	0	0	0	0	0	0	0	0	0	0	0	0	0	0	0.0775296	0	0.0234185	0	0	0	0	0	0	0	0	0	0	0	0	0	0	0	0	0	0	0	0.0243267	0	0	0	0
AL022724.1	0	0.0353507	0.027297	0.0275127	0	0	0.111919	0	0.0276697	0.0325751	0	0	0.290853	0.195923	0.74405	0.161521	0.0594292	0.1339	0.0635292	0.0600266	0	0.0294831	0.0856464	0.076382	0.103481	0.151812	0.183655	0	0	0	0.0250268	0	0.0329949	0	0.0289913	0.126923	0.0296706	0.0506801	0	0.140063	0	0.0349694	0	0	0	0.0670291	0.0551118	0.0492521	0
AL353807.2	0.185067	0	0	0.0692819	0.127395	0	0.211374	0	0.418064	0.0820301	0	0	0.219726	0.0822281	0.0669162	0	0	0.337184	0.399945	0	0	0.148488	0.215673	0	0.195438	0.0955723	0.308317	0.143738	0.177542	0.208054	0.126044	0.123162	0.249261	0.0799274	0.0730053	0	0	0	0.194352	0	0	0	0.0839708	0	0	0	0.277563	0.372077	0.573239
LINC01625	0	0.382415	0.214758	0.351739	1.57548	0.669951	0.247645	0.266992	0.0907041	0.459175	0.526276	1.33155	0.104879	0.406762	0.00871099	0.127076	0.487038	0.307257	0.603941	0.285322	1.26466	0.299611	0.0140379	0.22535	0.0424027	0.248827	0.20068	0.0280671	0.034668	0.532651	0.0410203	0.945942	0	0.19769	0.560715	0.0332853	0.680844	0.215975	0.00843342	0.757586	0.268457	0.30951	0.29514	0.244674	0.00880943	0.703132	0	0.226035	0.0279836
AC083805.3	0	0	0.0115	0.0115909	0	0	0	0	0	0	0.0107358	0	0	0	0	0	0	0	0	0	0	0	0.0541233	0	0	0	0	0	0	0	0	0	0	0	0	0	0	0	0	0	0	0	0	0	0	0	0	0	0
AC009955.2	0.0375598	0	0	0	0	0	0	0	0	0	0.0260472	0	0	0	0	0	0	0	0	0	0	0	0	0	0	0	0	0	0	0	0.0511619	0	0	0	0	0	0	0	0	0	0	0	0	0	0	0	0	0	0
AC007557.1	0	0	0	0	0	0	0	0	0	0	0	0	0	0	0	0	0	0	0	0	0	0	0	0	0	0	0	0	0	0	0	0	0	0	0	0	0	0	0	0	0	0	0	0	0	0	0	0	0
LINC00556	0.0494112	0	0	0.0369952	0	0.0528481	0	0	0	0	0	0	0	0	0	0	0	0	0	0	0	0	0	0	0	0	0	0.0383766	0	0.0370322	0	0	0	0	0	0	0.0398969	0	0	0	0	0	0	0	0	0	0	0	0
AC007009.1	0.237266	0	0	0	0	0	0	0	0	0.1262	0	0	0	0	0	0	0	0	0	0	0	0	0	0	0	0	0	0	0	0	0	0	0	0	0	0	0	0	0	0	0	0	0	0	0	0	0	0	0
AL033397.2	0.223299	0.214819	0.0276463	0.278648	0.128094	0	0.25504	0.222087	0.756642	0.395904	0.0774273	0.184896	0.265118	0.231501	2.4222	0.13087	0.120379	0.20342	0.193026	0.12159	0.111636	0.895812	0.130114	0.116039	0.0524026	0.0384386	0.186005	0.0289052	1.28531	0.306819	0.60833	0.049535	0.70176	0.0321463	1.20385	0.102838	0.330553	0	0.260557	0.0709279	0.118488	0.637505	0.303953	0.404967	0.136087	0.203661	0.306994	0.19953	0.144096
AL591623.1	0	0.00999199	0.00771558	0.00777654	0	0	0	0	0	0	0	0	0	0	0.015022	0.0182617	0	0	0.0179567	0	0	0	0	0	0	0	0.0173035	0	0.0199282	0	0	0	0.0093261	0	0.00819447	0.01435	0.00838649	0	0	0	0	0.0395368	0.0094253	0	0	0	0	0	0
AC061975.6	0	0	0	0	0	0	0	0	0	0	0	0.0325622	0.0103756	0	0	0	0.0212001	0	0	0	0.285075	0	0	0.0136238	1.85496	0	0	0	0	0	0.348184	0	0	0	0	0	0	0	0	0	0	0	0	0.0095092	0	0.0119556	0	0	0
LINC01579	0	0.00288216	0.00667661	0	0.00206232	0	0.0547488	0	0	0	0	0	0.199193	0	0.0953273	0	0	0	0	0	0	0	0.0034914	0	0	0	0	0	0	0	0	0.00398758	0.00269009	0	0.0236367	0.00206961	0	0	0.0713148	0.00570973	0.0143075	0.00285107	0	0.00434667	0	0	0	0	0.00463991
AC145350.2	0	0	0	0	0	0	0	0	0	0.0119832	0	0	0	0	0	0	0	0	0.02337	0	0	0	0	0	0	0.0139614	0	0	0	0	0	0	0	0	0	0	0	0	0	0	0	0	0	0	0	0	0	0	0
AL355974.2	0	0.691557	0.0227236	0.51532	0.0421142	1.76674	3.81987	1.29083	0.0230338	0.230498	0.190921	0.636388	0	0.937808	0	0.900875	0.791556	0.794195	2.67071	1.89884	0.0114698	0.380423	0.695145	0	0.0646076	1.70608	0.0509616	0.106912	0.337477	0.0573151	0	1.0993	4.01016	0.739823	0	0.665643	0	0.653929	0	1.8364	0.0730426	0.116442	0	1.04295	0	2.16221	0	1.12751	6.06402
LINC01613	0	0	0	0	0	0	0	0	0	0	0	0	0	0	0	0	0	0	0	0	0	0	0	0	0	0	0	0	0	0	0	0	0	0	0	0	0	0	0	0	0	0	0	0	0	0	0.0109827	0	0
AC018878.1	0	0.0452293	0	0	0	0	0	0	0	0	0	0	0	0	0	0.0826628	0	0	0	0	0	0	0	0	0	0	0	0	0	0	0	0	0	0	0	0	0	0	0	0	0	0	0	0	0	0	0	0	0
LINC01672	0	0.00948393	0	0	0	0	0.00750642	0	0	0	0	0	0	0	0.07842	0	0	0	0	0	0	0	0	0	0	0	0	0	0.00945745	0	0	0	0.0088519	0	0.0155556	0	0	0	0	0	0.0156933	0	0	0	0	0	0	0	0
LNX1-AS2	0.0229509	0	0	0	0	0	0	0	0	0	0	0	0	0	0	0	0.0371181	0	0	0	0	0	0	0	0	0	0	0.0178254	0	0	0	0	0	0	0	0	0	0	0	0	0	0	0	0.0166492	0.0167846	0	0	0.0307618	0
AL096870.2	0.307534	0.122201	0.104293	0.0750838	0.0506235	0.0572044	0.111992	0.0455947	0.176195	0.100753	0.152998	0.0788844	0.264585	0.0831733	0.087024	0.0646507	0.0324372	0.115717	0.1387	0.0436844	0.145393	0.187743	0.280482	0.0625354	0.00941354	0.0483354	0.155931	0.0778874	0.307856	0.0851802	0.0682998	0.044492	0.102051	0.0692966	0.026373	0.106223	0.102566	0.0645443	0.0514868	0.0127414	0.0638553	0.101796	0.0546017	0.0775976	0.259133	0.0792683	0.0401076	0.0448041	0.0776556
AC113349.1	0	0	0	0	0	0	0	0	0	0	0	0	0	0	0	0	0	0	0	0	0	0	0	0	0	0	0	0	0	0	0	0	0	0	0	0	0	0	0	0	0	0	0	0	0	0	0	0	0
AC022784.2	0	0	0	0	0	0	0.0945168	0	0.0467348	0	0	0	0.147377	0	0	0	0	0	0.643814	0	0.0930871	0	0	0	0	0	0	0	0	0	0	0	0	0	0	0	0	0.0855999	0	0	0	0	0	0	0	0	0	0	0
AC084149.1	0	0	0.106497	0	0	0	0.436641	0	0	0	0	0	0	0	0	0	0	0	0	0	0.107509	0	0	0	0	0	0	0	0	0	0	0	0	0	0.0565534	0	0.0578786	0	0.0501848	0	0	0	0	0	0	0	0	0	0
AC025280.1	0	0	0.0581636	0.0586232	0	0	0	0	0	0.13882	0	0.0486241	0	0	0	0.0688327	0.12663	0.0713275	0	0	0	0	0.0912464	0.162753	0	0.0808688	0.130442	0	0	0	0.0533264	0.104214	0	0	0	0.324532	0	0	0	0	0	0	0	0	0	0	0	0	0
AC079035.1	0	0.0230947	0.0178332	0.0359482	0	0.0256762	0.0365584	0	0	0	0.0166481	0	0.038003	0	0.0173603	0	0	0	0.124511	0	0.0180027	0.0192614	0	0.0249503	0.0169011	0.0495894	0	0	0.0230302	0	0	0	0	0	0	0	0	0	0	0.0457519	0	0.0228456	0.0217849	0.0174149	0	0	0	0	0
LINC02016	0	0	0	0	0	0	0	0	0	0	0.0304586	0	0	0	0	0	0	0	0	0	0	0	0	0	0	0	0	0	0	0	0	0	0	0	0	0	0	0	0	0	0	0	0	0	0	0	0	0	0
AL391335.1	0.30441	0	0.113066	0	0	0	0	0.0324383	0	0	0	0	0	0	0	0	0	0	0.0328927	0	0	0.0610604	0	0	0	0	0	0	0	0.0285183	0	0	0	0	0	0	0	0	0.0266401	0	0	0	0	0	0	0	0	0	0
AC008067.1	0	0	0	0	0	0	0	0.00516964	0	0	0	0	0	0	0	0.0053311	0	0	0	0	0	0	0	0	0	0	0	0	0	0	0	0	0	0	0	0	0	0	0	0	0	0	0	0	0	0	0	0	0
PTPRD-AS2	0	0	0	0	0	0	0	0	0	0	0	0	0	0	0	0	0	0	0.0062007	0	0	0	0	0	0	0	0	0	0	0	0	0	0	0	0	0	0	0	0	0	0	0	0	0	0	0	0	0	0
AL109930.1	0	0	0.0417749	0.0210525	0	0.0300738	0.0428198	0.0479406	0.127036	0.0498526	0.0389988	0	0	0.0249864	0	0.0741567	0	0	0.024306	0.045932	0	0	0.0655361	0	0.0395915	0	0	0	0	0	0.0957518	0	0.0252475	0	0.0443678	0.0776963	0.0454075	0.0387801	0	0	0	0	0	0	0.0411269	0.0256451	0.0632567	0	0
LINC01744	0	0.0287722	0.00740575	0.0821069	0.0892143	0.0959651	0.523777	0.00849877	0	0.132566	0.0898768	0.0309556	0.00789092	0.159463	0.165816	0.043821	0	0.0272456	0.0344713	0	0.0822376	0.175975	0	0.031084	0.0772053	0.0823737	0.564695	0.0309719	0.0286919	0.0747174	0	0.0796149	0.0089516	0.0688894	0.0471924	0.0550951	0.209293	0.0824979	0.0279187	0.113999	0	0.0284619	0.00904681	0.101248	0.00729086	0.227315	0.261659	0.0267245	0.0463195
MIR4432HG	0	0	0.00754241	0.00760201	0	0	0.00773105	0	0.00764539	0	0	0	0	0	0	0	0	0	0	0	0	0.0244394	0	0	0	0.0104867	0.0169152	0	0	0.00760962	0	0	0	0	0	0	0	0	0	0	0	0.00966237	0	0.00736548	0.00742541	0	0	0.0136088	0
BX284668.6	0	0	0	0.0347991	0.0639886	0	0	0	0	0.123607	0	0	0.22073	0.0413018	0.0672218	0.122579	0.0751685	0.254043	0.200886	0.0759241	0.0697091	0	0.108329	0	0.0327217	0	0.309725	0.0360985	0.0891764	0	0.12662	0.0618621	0.208666	0	0.0366693	0.0963221	0.0750571	0.0641022	0	0	0.0739876	0	0	0	0.101972	0	0	0	0
MAFG-DT	3.58806	0.0826778	0.295268	0.056303	1.21278	0.0804295	0.817982	0.128213	0.622867	0.238082	0.208597	0.206813	0.688746	0.162287	0.318514	0.226657	0.17374	0.0489318	2.30301	0.114066	0.306131	0.232722	0.212828	0.0893206	1.40674	0.12205	2.16554	0.125154	22.1989	0.0885647	0.0365828	0.0571939	1.30221	0.102071	0.0423777	0.0445268	0.555146	0.059265	0.13538	0.0204737	0.222314	0.0715627	0.107235	0.0857234	2.44335	0.0293938	0.725032	0.143988	0.241245
LINC02518	0	0.0322641	0	0	0.046173	0.0358705	0	0.0571812	0.101015	0	0.0232579	0.0624824	0	0.0894078	0.024253	0.058967	0.0542402	0	0.115964	0	0.100602	0.0538176	0	0	0.0708342	0.103917	0.055873	0.104192	0	0.0754067	0.0228416	0	0.0301139	0.0579375	0	0.254849	0	0.09251	0	0.127834	0	0.0638321	0	0.145975	0	0.214118	0	0.0899034	0
AC116407.1	0.598373	0.122478	0.11349	0.0762578	0.140223	0.0680845	0.0484702	0.151947	0.0575197	0.191865	0.203067	0.17394	0.24185	0.0565672	0.119688	0.0111923	0.288263	0.104382	0.231113	0.228769	0.286422	0.153224	0.0593472	0.0793915	0.19719	0.131494	0.0848403	0.276868	0.109923	0.257628	0.36418	0.118617	0.102885	0.120966	0.060267	0.00879489	0.0616792	0.122913	0.151527	0.339691	0.243201	0.399819	0.184851	0.138535	0.204837	0.116117	0.343699	0.119449	0.128163
LINC01823	0.0140299	0.0134971	0	0	0	0	0.0320484	0	0	0	0	0	0	0	0	0	0	0	0	0	0	0	0	0	0.00987741	0	0	0	0.0134594	0	0	0	0	0	0.011069	0	0	0	0	0	0	0	0	0	0	0	0	0	0
AC114489.1	0	0	0.0382849	0	0	0	0.15697	0	0.271653	0	0.0357407	0	0.163172	0	0	0	0	0	0	0	0	0.041351	0	0	0.108852	0	0	0	0.0494421	0	0	0	0.0462764	0	0	0	0.041614	0	0	0	0	0	0	0	0	0	0.734312	0	0.518818
AL354928.1	0.0659884	0.0317412	0.0490196	0	0.0908493	0.0352892	0.0251228	0	0.124222	0	0	0	0.104462	0	0.143159	0	0	0.030057	0.142606	0	0.0494855	0	0.153803	0.0342915	0.139372	0.102233	0.0549675	0	0	0.0741845	0.0224714	0	0	0.0569984	0.0520621	0	0.026641	0.0455053	0.115498	0	0.0525228	0	0.029941	0.0478697	0.0965183	0	0.148453	0.0442231	0.0766487
AC090971.2	0.079833	0	0.029652	0	0	0	0.121575	0	0	0.106157	0	0	0	0	0	0	0.193669	0	0.13802	0	0	0	0	0	0.0281022	0	0	0.0310022	0	0	0	0	0.0358415	0	0	0	0	0	0	0	0	0	0.0362227	0	0.0291921	0	0.0598665	0	0
AL591848.3	0	0.0527879	0.0509519	0	0.0236076	0.0220082	0.156679	0.0116944	0.0309885	0.0243216	0.023783	0.00425952	0.0542899	0.0243803	0.049601	0.0241193	0.0110929	0.0312418	0.112653	0.0112044	0.0925853	0.0715422	0.127893	0.0213859	0.125551	0.0141684	0.0228537	0.0532721	0.0855409	0.0308436	0.0280287	0.036517	0	0.0414717	0.0378801	0.0284293	0.0996884	0.0378393	0.0336143	0.0522879	0.0218373	0.0391639	0.0311213	0.029854	0.0551777	0.0437903	0.0771528	0.0275799	0.0849816
AC105389.2	0.0467987	0	0	0	0	0	0.142536	0.0797908	0.140956	0	0.0324542	0	0	0	0	0	0	0.085265	0	0	0	0.0375486	0	0	0.0329474	0.0483354	0	0.0363475	0	0.0350742	0.0318733	0.0622888	0	0	0	0.0323288	0	0	0	0.0891899	0	0	0	0	0.0342252	0	0.0350942	0.0627257	0.0362393
AC008073.1	0.0374906	0	0	0	0	0.0400984	0.057093	0.0639208	0.0282302	0	0.0259992	0.0232823	0.059349	0	0.35245	0	0	0	0	0	0.0281147	0.0300804	0.131072	0.0779294	0.0263943	0	0	0.0582363	0	0.0561963	0	0	0.0336633	0.0323831	0.0591571	0	0	0	0	0	0	0	0	0	0	0	0.0281141	0	0
BX284668.5	15.4684	4.43345	0.773988	1.86025	2.67581	4.0718	5.46188	1.74228	1.23718	4.65376	1.13941	1.71716	10.5307	7.94116	1.15918	3.45247	4.21269	2.51893	11.0504	3.66588	3.21554	2.99021	5.65081	2.20741	0.366767	3.43533	7.00997	1.83633	17.8765	6.84776	2.81118	4.8004	19.4666	6.23056	5.81743	2.85136	4.8536	2.59765	3.67534	2.97855	1.53102	1.41103	5.70936	2.61634	3.83921	3.61839	20.4949	1.87992	6.2684
AC114808.1	0	0	0	0	0	0	0	0	0	0	0	0	0	0	0	0	0	0	0	0	0	0	0	0	0	0	0	0	0	0	0	0	0	0	0.0371786	0	0	0	0	0	0	0	0	0	0	0	0	0	0
AC121333.1	0	0	0	0	0	0	0	0	0	0	0	0	0	0	0	0.0132126	0	0	0	0	0	0	0	0	0	0	0	0	0.00720917	0	0	0	0	0.00649096	0	0	0	0	0	0	0	0	0	0	0	0	0	0	0
AL645634.2	0	0	0	0	0	0	0.0377147	0.042225	0	0	0	0	0	0.132045	0	0	0	0.045122	0	0	0	0	0	0	0	0	0	0	0	0	0	0	0.0444749	0	0	0	0	0	0	0	0	0	0.0449479	0	0	0	0	0	0
AC140118.1	0	0	0	0	0	0	0	0	0	0	0	0	0	0	0	0	0	0	0	0	0	0	0	0	0	0	0	0	0	0	0	0	0	0	0.0301901	0	0	0	0	0	0	0	0	0	0	0	0	0	0
LINC00319	0	0	0	0.0108304	0	0	0	0	0	0.00427443	0	0.00299438	0.0038165	0.00428474	0.00348687	0	0.00779815	0.0131775	0.00416807	0.0118148	0	0	0.0224766	0.0100227	0.0135785	0	0.0080329	0	0.00462568	0.00361376	0.0361235	0	0	0.00416486	0.0418457	0.0333089	0	0	0	0	0.00767565	0	0	0.00699564	0	0	0.0759321	0.00646274	0
AL133353.1	0	0.323173	0.349365	0.301822	1.43372	0.503016	1.27894	0.744582	0	0.833838	0.372741	0.333789	0.478612	0.597036	0.680204	0.531579	0.760616	0.734461	0.871167	0.493882	0.856524	0.377345	0.234892	0.349139	1.70283	0.416354	0.11193	0.104364	1.16018	0.503541	0.457586	0.715396	1.14622	0.290165	1.74923	0.278476	1.73597	0.277988	0.987795	0.128045	0.213905	0	0.243876	0.0487386	0.0982703	0.24511	0.55421	0.180103	0.208107
LINC01523	0	0	0	0	0	0	0	0	0	0	0	0	0	0	0	0	0	0	0	0.0369497	0	0	0	0	0	0	0	0	0	0	0	0	0	0	0	0	0	0	0	0	0	0	0	0.0328173	0	0	0	0	0
AC097376.2	0.227786	0.189589	0.157804	0.139888	0.343555	0.128659	0.407299	0.170185	0.601288	0.16109	0.269785	0.278149	1.66116	0.320683	0.50713	0.39825	0.182128	0.174866	0.659301	0.167235	0.451041	0.213565	0.140185	0.133001	0.279291	0.150676	0.183347	0.188843	0.0785703	0.211001	0.318993	0.235051	0.112607	0.170225	0.312985	0.231614	0.254188	0.169435	0.268779	0.224376	0.224084	0.299583	0.459865	0.274784	0.329429	0.378158	0.309004	0.243561	0.196209
LINC01465	0.503689	0.211995	0.179288	0.212131	0.382843	0.314256	0.351564	0.295205	0.0948186	0.297676	0.203759	0.123816	1.42029	0.186497	0.356656	0.193725	0.356392	0.200746	0.317482	0.179987	0.3069	0.311518	0.44024	0.119967	0.103428	0.151733	0.332156	0.114101	0.694611	0.10224	0.185818	0.251403	0.131912	0.0815753	0.298042	0.14498	0.118621	0.188143	0.271826	0.259984	0.15034	0.0699028	0.314241	0.152245	0.191855	0.14356	0.3305	0.0843887	0.300655
AC008870.3	0	0	0	0	0	0	0	0	0.0717426	0.0281539	0.0220243	0	0	0	0	0	0	0	0.0549066	0	0	0	0.037011	0	0.022359	0	0	0	0	0	0	0	0	0	0	0	0.0256435	0	0.0444695	0	0	0	0	0	0	0	0	0	0
HOMER3-AS1	0.29781	0.0204643	0.0632081	0.0318538	0.0878589	0.0682552	0.0971834	0.0906713	0.128142	0.113145	0.0590076	0.0528412	0.101024	0.132321	0	0.0748025	0	0.0387568	0.0183883	0.0173745	0.0319045	0.0341351	0.22311	0.0663255	0.0149761	0.0659119	0.106316	0.0165216	0.0204071	0	0.0579514	0.0283131	0.114603	0.110245	0	0.0146949	0.0171761	0.0586766	0.0446786	0.0405408	0.0338627	0.0404871	0.0193036	0.0308627	0.108898	0.058204	0.0478557	0	0.0658896
AC084859.1	0	0	0	0	0	0	0.0231355	0	0.0915164	0	0.021071	0	0	0	0	0	0	0	0.0525301	0	0	0.0487572	0	0	0	0	0	0	0	0.0227721	0	0	0	0	0	0	0	0	0	0	0	0.028915	0	0	0	0	0	0	0
AC010329.1	0	0.00470324	0	0	0.0016827	0	0	0.00208387	0	0.00216698	0.00339039	0.00303609	0	0	0	0.00214896	0.0118602	0.00222684	0.00211306	0.00199656	0	0.00392259	0	0	0	0	0	0.00189855	0	0	0	0	0	0	0	0.00168864	0	0	0	0	0	0	0	0	0	0.00222947	0	0	0
AL121601.1	0.124892	0	0.417493	0.0467547	0.128959	0.133579	0.665677	0	0.094043	0.332146	0.216527	0.03878	0.34599	0.0554914	0.135475	0.109794	0.100993	0	0.863685	0.153013	0.140487	0.15031	0.509412	0	0.131891	0.0644966	0	0	0.299534	0.0468015	0.127591	0.0831154	0.0560711	0	0.147802	0.215691	0.0504218	0	0	0	0.0994067	0.0594266	0.113335	0.0906	0.0456685	0.0569542	0.234141	0.334794	0.0967122
AC245052.1	0	0.0477666	0	0	0	0	0.0378067	0	0	0	0	0	0	0	0	0	0	0.045232	0	0	0.0744697	0	0.115727	0	0.0349564	0	0	0	0	0	0	0	0	0	0	0	0	0	0	0	0	0	0	0	0	0	0	0	0
AL049840.2	0.646871	0.256243	0.310931	0.284898	0.261935	0.244188	0.521521	0.519013	1.00283	0.236124	0.184716	0.118152	0.421655	0.338134	0.412754	0.200708	0.184619	0.207983	0.559175	0.0932376	0.199746	0.396892	1.15295	0.395473	0.482202	0.432308	1.58481	0.206875	0.292032	0.17111	0.310988	0.25323	0.136667	0.230071	0.390271	0.236574	1.04463	0.577279	0.186481	0.145038	0.242292	0.325902	0.552481	0.303637	1.22443	0.347048	1.39819	0.204005	0.53038
AC009120.5	0	0	0	0.0313192	0.0479914	0.0298266	0.0743187	0.0237733	0	0	0	0.0173182	0.0772553	0	0.0302498	0	0.0225505	0.0381065	0	0	0.0522818	0.0335623	0.0162494	0	0.019633	0.0144013	0	0.0216591	0	0.0104502	0.0474824	0	0.0375599	0	0.0110008	0	0	0	0.0488099	0	0.0443926	0.0398076	0.0253063	0	0.0101972	0.0127172	0.0104561	0.0186888	0.0107973
AC138466.3	0	0	0	0	0	0	0	0	0	0	0	0	0	0	0	0	0	0	0	0	0	0	0	0	0.0648512	0	0	0	0	0	0	0	0	0	0	0	0	0	0	0	0	0	0	0	0	0	0	0	0
HPN-AS1	0.434678	0.801493	1.03597	0.352573	0.872727	0.154971	1.83416	0.12352	0.531878	0.465616	0.401924	0.393665	0.55909	0.273606	0.746556	0.366209	0.117167	0.758965	3.30346	0.34024	0.84209	0.42142	0.717632	0.131766	0.930823	0.318007	0.120694	0.337605	0.139001	0.515816	0.752453	0.120532	0.0975756	0.156441	0.814489	0.112604	1.3308	0.349711	0.634007	1.07004	1.41274	0.637725	0.739601	0.512406	0.860958	0.379931	1.01864	0.412684	0.490874
TAT-AS1	0.116595	0.0897334	0.34645	0.192053	0.642085	0.0249409	1.42046	0.0198791	0.263385	0.20672	0.0323427	0.333072	1.16281	0.269384	0.809433	0.1025	0.0377134	0.042486	0.665201	0.685665	0.0174872	0.785811	0.135877	0	0.870106	0.192677	0.116546	1.26779	0.268449	1.64282	0.381165	0.124149	0.0837533	0.0805682	1.26944	0.0644354	0.847294	1.06132	4.31003	1.77767	2.41286	1.0208	4.84588	1.20105	0.443398	0.106341	0.629524	1.75028	0.234746
AC022898.2	0.0620653	0.0746353	0.115263	0.116174	0.010681	0.0165956	0.15359	0	0	0.0962854	0.0430414	0.0192717	0.110533	0.0275765	0.0112207	0.0682031	0.0752831	0.14135	0.0536512	0.0126733	0	0.0248989	0	0.0483792	0.0109239	0.0801292	0.0258498	0.0241024	0	0.0232581	0.0422709	0.0619564	0	0	0.0367252	0.0321563	0.062643	0.0214	0	0.147857	0.0494003	0.0295321	0.0563219	0.0562797	0	0.0424552	0.0349069	0	0.0120153
AL356859.1	0	0.0473051	0	0	0.033849	0	0	0	0	0	0.0341004	0	0	0	0	0	0	0	0	0	0	0	0	0	0	0	0	0	0	0	0	0	0	0	0	0	0	0	0	0	0	0	0	0	0	0	0	0	0
AC026803.2	0.322792	0.207022	0.319715	0.145009	0.636977	0.0920652	0.0983135	0.183451	0.32408	0.190768	0.0596938	0.240551	0.39176	0.0764913	0.40461	0.208099	0.139213	0.254849	0.409246	0.105459	0.322754	0.189926	0.225705	0.0670967	0.257554	0.133357	0.394359	0.100282	0.5574	0.112897	0.527627	0.257781	0.135258	0.074351	0.16978	0.118926	0.0521274	0.237436	0.195859	0.0410122	0.171282	0.122874	0.156225	0.156108	0.220329	0.0392538	0.661633	0.230746	0.199967
AC005674.2	0.0231993	0.0223183	0.439458	0.0521095	0.123766	0.0186098	0.110404	0.0296658	0.0262034	0.0874053	0.0361989	0.0144071	0.0504974	0.164925	0.134214	0.071382	0.03752	0.0317011	0.14038	0.0378971	0.0956861	0.516534	0.371745	0.0421951	0.102081	0.0119806	0.193247	0.153156	2.12545	0.126057	0.288358	0.0463173	0.020831	0.0150291	0.0503341	0.0600984	0.262251	0.0559936	0.0162421	0.0663207	0.0369306	0.149024	0.0473682	0.0673176	0.114523	0.132244	0.078287	0.132153	0.0718591
AP003351.1	0	0	0	0	0	0	0	0	0	0.0270159	0	0	0	0	0.0220383	0	0.0492871	0	0	0	0	0	0	0	0	0	0	0	0	0	0	0	0	0	0	0	0	0	0	0	0	0	0	0	0.312023	0	0	0	0.0235989
AC245100.6	0.0212278	0.0102108	0.0315381	0	0.0219189	0	1.22034	0	0.495515	0	0	0	4.61219	0	6.50113	0	0	0	0.00917496	0	0.819827	0	0.123692	0	0	0	2.51091	0	1.82263	0	0.0289153	0	0	0	0.376826	0	0.0171403	0	0.0520163	0	0	0	0	0	0.0310489	0	0.143268	0	0.0246571
AF127577.4	0.216313	0.647415	0.612145	0.483302	0.564889	0.631646	0.473206	0.468328	0.42401	0.587451	0.478602	0.61836	0.241875	0.738375	0.618261	0.344105	0.22212	0.340938	0.632195	0.661842	0.782754	0.358134	0.840286	0.446066	0.333586	1.03551	0.463334	0.458681	0.751013	0.45548	0.294649	1.36186	0.493282	1.56889	0.4253	0.623811	0.76518	0.426195	0.538464	0.418797	0.377139	0.601222	0.641855	0.96642	1.10988	0.601261	0.664297	0.372768	0.231316
AC004053.1	0	0.136239	0	1.21936	0.146228	0	0	0	0	0	0.0245523	0.0659597	0.0280231	0	0	0.155622	0	0.0322524	0	0.0289172	0.0265501	0	0	0.110389	0	0.1097	0	0	0	0	0	0.0942456	0	0	0	0	0	0	0.0495738	0.0674741	0	0	0	0	0	0.0968717	0	0	0
AC145423.3	0.91543	0.0419364	0.259058	0	0.060015	0	0.165961	0	0.196946	0.0386437	0.0302303	0.0270712	0.172519	0.077474	0.189142	0.153289	0	0	0.150729	0.0356047	0.0980703	0.0699514	0.203204	0	0.184139	0.0900467	0.0726229	0	0.167277	0	0.178135	0.116041	0.0782834	0	0	0.0301136	0.0703962	0	0.0915577	0.0830783	0.138786	0.0414841	0.158232	0.0948681	0.12752	0.0795164	0.163447	0.175283	0.303805
RN7SL832P	0.0695584	0.055764	0.189462	0.0433998	0.702271	0.136394	0.0794458	0.128479	0.113483	0.133603	0.064317	0.13679	0.33034	0.0927174	0.44433	0.132491	0.0749972	0.116171	0.150321	0.0284067	0.147794	0.176731	0.310737	0.0481955	0.138751	0.0718425	0.15451	0.117053	0.711786	0.147707	0.102644	0.138873	0.0624573	0.0700957	0.320126	0.0560599	0.0374431	0.0639562	0.178562	0.0662829	0.110729	0.022065	0.284047	0.126149	0.0593483	0.137456	0.321663	0.0932312	0.0897727
AC096711.2	0	0.0431372	0.0666191	0	0.0617335	0	0	0.0382258	0.0337643	0	0.031096	0	0.177459	0	0.875512	0	0	0	0.0387612	0	0	0.0359772	0.104511	0	0	0	0	0	0	0	0	0	0	0	0.035377	0.0309758	0	0	0.0313931	0	0	0.0853439	0.0406907	0.0650564	0	0.0817933	0.0672509	0	0
AC022537.1	0	0	0	0	0	0	0	0	0	0	0	0	0	0	0	0.0802533	0	0	0	0	0	0	0	0	0	0	0	0	0	0	0	0	0	0	0	0	0	0	0	0	0	0	0	0	0	0	0	0	0
AL121999.1	0	0	0.0455498	0	0	0	0	0	0	0	0.0425228	0	0	0	0	0	0	0	0	0	0.643759	0	0.071458	0	0.086338	0	0	0	0	0	0.0835233	0	0	0	0.096754	0	0	0	0	0	0	0	0	0	0	0	0	0	0
AL358781.2	0.0860779	0.124213	0	0.257793	0.237015	0	0.0655423	0.0366903	0.0972241	0.114461	0.0298469	0.0267278	0.476925	0.152983	0.684724	0	0.208819	0.15683	0.297633	0.070306	0.419581	0.379852	0.100313	0.134193	0.0606009	0.133357	0.0717017	0.233992	0	0.129026	0.0293126	0.0572846	0	0.0371755	0.135824	0	0	0.118718	0.120528	0.164049	0.137026	0.0409578	0.0390562	0.156108	0.157378	0.0392538	0.0322748	0.173059	0.0666557
AL358394.1	0.0380513	0	0.0282664	0	0	0	1.10099	0	0	0	0.026388	0	0.0301182	0	0	0	0.12308	0	0.296034	0	0	0	0.399096	0	0	0	0.0633924	0	0	0	0	0	0.0341667	0	0	0	0	0	0.133201	0	0	0	0	0	0.0278279	0.0347048	0	0	0
CACNA1C-AS3	0	0	0	0	0	0	0	0	0	0	0	0	0	0	0	0	0	0	0	0	0	0	0	0	0	0	0	0	0	0	0	0	0	0	0	0	0	0	0	0	0	0	0	0	0	0	0	0	0
AF181450.1	0	0	0	0	0.0341793	0	0	0	0	0	0	0	0	0	0	0	0	0	0	0	0	0	0	0	0	0	0	0	0	0	0	0	0	0	0	0.0343001	0	0	0	0	0	0	0	0	0	0	0	0	0
LINC00927	0	0.00534506	0	0	0	0	0	0	0	0	0	0	0	0	0	0	0	0	0	0	0	0	0	0	0	0	0.00925625	0	0	0	0	0	0	0	0	0	0	0	0	0	0	0	0	0	0	0	0	0	0
CAMTA1-IT1	0.111548	0	0	0	0	0	0.0424678	0	0.0419973	0	0.0386783	0	0	0	0	0	0	0	0.0482125	0	0	0	0.0649974	0	0	0.0576052	0	0	0.374541	0	0	0	0	0.0481754	0.0440032	0	0	0	0	0	0	0	0	0	0.0407889	0	0	0	0
AC114814.1	0	0	0	0	0	0	0	0	0.0221838	0	0	0	0	0	0	0	0	0	0	0	0	0	0	0	0	0	0	0	0	0	0	0	0	0	0	0	0	0	0	0	0	0	0	0	0	0	0	0	0.0456269
LINC01444	0	0	0	0	0.0209783	0.0162975	0.104421	0.0129899	0	0	0	0	0	0	0	0	0	0	0	0	0	0	0.0177575	0	0.0107276	0	0	0	0	0.0114201	0	0	0	0	0	0	0	0	0	0	0	0.0290016	0	0	0	0	0	0.0204234	0
AC138969.2	0	0	0.02073	0	0	0	0	0	0	0	0	0	0	0.012399	0	0	0	0	0.0241228	0	0.0104635	0	0	0.0145016	0	0.0144112	0	0	0	0	0	0	0	0	0	0.0192776	0	0	0	0	0	0	0	0	0.0204084	0.0254518	0	0	0
BEAN1-AS1	0.0392621	0.0566566	0.0291659	0	0.027027	0.0209966	0.0298954	0.0167353	0	0.0348055	0.0272277	0.0487648	0.046615	0.0174447	0.0141963	0.0862897	0.0634981	0.107301	0.118788	0.0320682	0.0294432	0.0945052	0.0228776	0.0816117	0	0.121654	0	0	0	0	0.0133702	0.0522577	0.0528809	0.0339132	0	0.0542451	0.0792551	0.081225	0.0549758	0.0374133	0.156252	0.0373637	0.0890723	0.0854453	0.0143567	0.089523	0.0147213	0.0789364	0.0304032
AC009163.3	0.0477874	0	0	0	0	0	0.0727735	0	0.0179918	0.0211815	0	0.0148383	0	0	0	0	0	0	0.0206544	0	0.0358363	0	0.0278451	0	0.0504652	0	0.0796125	0	0	0	0.0162733	0	0	0	0.0188511	0	0	0	0.0167283	0	0	0	0.0433652	0	0	0	0	0.0640509	0
AC008507.2	0.0346215	0.0333066	0.0385779	0.0388827	0	0	0	0	0.0130349	0	0.0120047	0.0107502	0.0137017	0	0.0500734	0.0152181	0	0	0	0	0	0	0.0201735	0	0.0243743	0	0	0.0403346	0	0	0	0	0	0	0	0	0.0139775	0	0.0484778	0.0329911	0	0.0164737	0	0.0376729	0.0253196	0	0.0129813	0	0
AC015660.3	0	0	0.0487038	0.0490886	0.11283	0	0	0	0	0.116242	0.0454672	0	0.0259473	0.0291307	0.0474125	0.0576377	0	0	0.481737	0.0267752	0	0.0263022	0.152812	0	0.0230791	0.101574	0	0	0.125795	0.0491378	0.111633	0.0436322	0.23548	0	0.0775901	0	0.0529389	0.0452122	0.0229508	0	0	0.0623931	0.0594963	0	0.0719224	0.089696	0.0737486	0.0439383	0.025385
AC092894.1	0	0	0	0	0	0	0	0	0	0	0	0	0	0	0.433264	0.0229002	0	0	0.146365	0.0106381	0	0	0	0	0	0	0	0	0	0	0	0	0	0	0	0	0	0	0	0	0	0	0	0	0	0	0	0	0
CD44-AS1	0	0.0667268	0	0	0	0	0.105627	0.0591295	0.0261141	0.122975	0.0240504	0.0430742	0	0.030818	0.401269	0.213416	0.0560882	0.0315931	0.0599577	0.056652	0.0260073	0.278256	0.28291	0.036044	0.0244159	0	0.115553	0.134678	0	0.025992	0	0	0	0	0	0.0718724	0	0.0956619	0.0485604	0	0	0.0990105	0	0.0251581	0.101451	0.0632609	0.208054	0.0929665	0.080566
AC002480.2	0	0	0	0	0	0	0	0	0	0	0	0	0	0	0	0.0642603	0	0.0332947	0	0.0298517	0	0	0.127778	0	0	0.0377485	0	0	0	0	0	0	0.0328172	0	0.0865053	0	0	0.0504071	0	0	0	0	0	0	1.33644	0.0666681	0.0274075	0	0
LINC01749	0.0155163	0	0.00768421	0	0	0	0.0078764	0	0.00778913	0	0	0	0	0	0	0	0	0	0	0	0	0.00414981	0	0	0	0	0	0	0	0	0	0	0	0	0	0	0	0	0	0	0	0	0	0	0	0	0	0	0
AL359502.1	0	0	0	0	0	0.0314645	0	0	0	0	0	0	0	0	0	0	0	0	0	0	0	0	0.0342833	0	0	0	0	0	0	0	0	0	0	0	0	0	0	0	0	0	0	0	0	0	0	0	0	0	0
AP001782.1	0	0	0	0	0	0	0	0	0	0	0	0	0	0	0	0	0	0	0	0	0	0	0	0	0	0	0	0	0	0	0	0	0	0	0	0	0	0	0	0	0	0	0	0	0	0	0	0	0
AC017067.1	0	0	0.0338312	0	0.0313501	0.19484	0.0693546	0	0	0.242237	0	0.0848474	0.0360476	0.0404702	0.0329342	0.160148	0.073655	0	0.196841	0.0743954	0	0.0730812	0.212296	0.0473329	0	0.188151	0	0.0353717	0	0.136531	0	0.0606166	0	0	0	0.0314609	0	0.0628116	0	0.260386	0	0	0.0826559	0.0660751	0.0333064	0.0830741	0.102456	0.0610418	0
AL360181.1	0.110638	0.957928	0.164375	0.994045	5.63586	0.591669	1.17941	0.848861	0.416549	0.686556	0.690533	0.961912	4.99161	0.688214	4.24045	0.972635	2.50507	2.21735	5.06887	0.542197	3.4847	0.710159	3.09444	0.574941	0.934703	0.457085	0.18432	1.97639	0.849115	1.49256	0.60282	1.17807	0.0993433	0.668957	0.7856	0.382148	7.95075	1.6785	1.47172	4.00627	2.64184	2.84279	20.1804	3.45117	0.0809127	1.61453	1.41044	1.18633	0.685395
AC079793.1	0.0285518	0	0	0.0213773	0	0	0.0434804	0	0	0	0.0198002	0.0531933	0	0	0	0.0251003	0.0461764	0	0.0987241	0	0	0.068725	0.0332736	0	0	0	0	0.0221755	0	0.0427974	0	0	0	0.024662	0	0.0197237	0	0	0.0599683	0	0	0.0543424	0	0	0.0208807	0	0	0	0
AC136443.3	0	0.0289709	0	0	0	0	0	0	0	0.0266962	0	0	0	0	0.0217775	0	0	0	0	0	0	0	0	0	0	0.0311034	0	0	0.08667	0.0225699	0	0	0	0	0	0	0	0	0	0	0	0.0286584	0	0	0	0	0	0	0
AC107896.1	0	0	0	0	0	0	0	0	0	0	0	0	0	0	0	0	0	0	0	0	0	0	0	0	0	0	0	0	0	0	0	0	0	0	0	0	0	0	0	0	0	0	0	0	0	0	0	0	0
CFTR-AS1	0	0	0	0.0689684	0	0	0	0	0	0	0	0	0	0	0	0	0	0	0	0	0	0	0	0	0	0	0	0	0	0	0	0	0	0	0	0	0	0	0	0	0	0	0	0	0.0673663	0	0	0	0
AL357568.2	0	0	0.0199374	0	0	0	0	0	0	0	0	0	0	0	0	0.0117973	0	0	0	0	0	0	0	0	0	0	0	0	0	0	0	0	0	0	0	0	0	0	0	0	0	0	0	0	0	0	0	0	0
AC036101.1	0	0.0656091	0	0	0	0	0	0	0	0	0	0	0	0	0	0	0	0	0	0	0	0	0	0	0	0	0	0	0	0	0	0	0	0	0	0	0	0	0	0	0	0	0	0	0	0	0	0	0
LINC01748	0	0	0.0252323	0	0.0467636	0	0.0689689	0	0.392177	0	0	0	0.134426	0	0.18013	0	0	0	0.998305	0.0462385	0.0509442	0	0.593761	0	0.00797114	0	0.150901	0	0	0.0084857	0.0231338	0	0	0.00977976	0.00893279	0.015643	0.0548527	0	0.198171	0	0.0180237	0	0	0	0	0	0	0	0.377005
AC130650.1	0.049054	0.0471911	0.0364398	0	0	0	0	0	0	0	0	0	0	0	0	0	0	0	0	0	0	0	0	0	0	0	0	0	0	0	0.0334093	0	0	0	0	0	0	0	0	0	0	0	0	0	0	0	0	0	0
AL606516.1	0	0	0	0	0	0	0	0.00932536	0	0	0	0	0	0	0	0	0	0	0	0	0	0	0	0	0	0	0	0	0	0	0	0	0	0	0	0	0	0	0	0	0	0	0	0	0	0	0	0	0
Z84723.1	0.0526712	0	0.0391269	0	0.0181287	0	0.0401055	0	0.0198305	0.0233462	0	0	0	0	0.0190447	0	0	0	0	0	0	0.0422604	0.0920727	0	0.0185409	0	0	0	0	0	0.0179364	0.0350525	0	0	0.0207777	0	0	0	0.0368757	0	0	0.0250622	0.0238986	0	0	0	0	0	0.0407868
AL359532.1	0.313191	0.163203	0.232654	0.127017	0.134745	0.167488	0.208664	0.0778727	0.147394	0.0462734	0.117646	0.145872	0.278883	0.0347888	0.094369	0.0458884	0.16884	0.202094	0.157927	0.0959272	0.352299	0.282698	0.577894	0.108502	0.110247	0.0808688	0.195663	0.182436	0.050076	0.117364	0.239969	0.156321	0.140609	0.157805	0.102956	0.0811329	0.147516	0.161981	0.109634	0.174092	0.270055	0.335303	0.473682	0.160931	0.143153	0.11902	0.0391435	0.139927	0.121262
AC027271.1	0.0333728	0.224738	0.198328	0.0999477	0.137838	0.0356941	0.355755	0	0.0753885	0.0591693	0.0694307	0.0414501	0.105661	0.0593121	0.144802	0.20537	0.16192	0	0.634667	0.081774	0.350374	0.240988	0.155568	0	0.187962	0.103406	0.0555982	0.1296	0.160079	0.175084	0.0227293	0.044419	0.119863	0.0576525	0.342287	0.0691625	0.269467	0	0.210282	0.0636026	0.0531255	0	0.0605691	0	0.170845	0.182627	0	0	0.103371
SMAD1-AS1	0	0	0	0	0	0	0	0	0	0	0	0	0	0	0	0	0.136897	0	0	0	0	0	0	0	0	0	0	0	0	0	0	0	0	0	0	0	0	0	0	0	0	0	0	0	0	0	0	0	0
AP003481.1	1.13322	0	0.090194	0	0	0	0.0924499	0	0.0304752	0.035878	0	0	0	0	0	0	0	0	0	0	0	0	0.141495	0	0.0569865	0	0	0	0	0.0303326	0.0275643	0	0	0	0	0	0	0	0	0	0	0	0	0	0	0	0	0	0.0313401
AC131157.1	0	0	0	0	0	0	0	0	0	0	0	0	0	0	0	0	0	0	0	0	0	0	0	0	0	0	0	0	0	0	0	0	0	0	0	0	0	0	0	0	0.0448845	0	0	0	0.0206204	0	0	0	0
AC091047.1	0	0	0	0	0	0	0	0	0	0	0	0	0	0	0.053339	0	0	0	0	0	0	0	0	0	0	0	0	0	0	0	0	0	0	0	0	0	0	0	0	0	0	0	0	0	0	0	0	0	0
HORMAD2-AS1	0	2.74915	0.0210181	1.26046	0	1.13482	3.01613	1.32661	0	1.47985	2.2074	2.81134	18.14	3.40684	0.0306912	0.895446	5.67415	8.31245	5.0139	2.07987	30.4583	3.49601	0.0164865	1.44091	0.0298793	1.97255	1.46124	0.186789	27.5641	1.29353	0.597374	6.36436	1.85459	1.79628	5.58067	0.35182	25.4844	0.604851	10.7859	4.50257	6.73354	1.8848	0.0385134	1.39571	0	0.864485	4.06314	0.170654	0
LINC02092	0	0.02352	0	0.0122034	0	0	0.0372316	0	0.0306825	0.00722443	0	0.0101219	0.00645046	0	0.0117867	0	0	0.007424	0	0	0.0061114	0	0.0284917	0	0.00573744	0.0168342	0	0	0.0547268	0.0061078	0.0222015	0	0.014635	0	0.00642961	0	0.00658027	0	0	0	0.012973	0.0232663	0.0665582	0.00591185	0	0	0	0	0.018932
AC113133.1	0	0.0427605	0	0.0110932	0.0101991	0.0158467	0	0	0	0	0	0.0460053	0	0	0	0	0	0	0.0128076	0	0	0	0.0172664	0	0	0.0306054	0	0	0	0	0	0	0.0266072	0.0255954	0	0	0.0119633	0	0	0.028237	0	0	0.0134451	0.010748	0	0	0	0.0198586	0
AC008280.3	0.611835	0.187282	0.950323	0.437271	1.3018	0.892353	0.635277	0.948333	0.607296	1.06012	1.00289	1.17442	1.32076	1.95236	2.19215	1.68696	1.07947	0.912056	1.03374	0.885885	2.12727	1.09337	0.745428	0.780412	0.783176	0.976613	0.694978	0.777597	3.01482	1.02132	0.70082	0.888381	1.17366	1.27316	2.6988	0.768472	3.50308	1.68767	0.720412	0.954039	0.708341	1.00571	1.36281	1.41222	1.05761	1.01459	1.18874	0.74551	0.559926
AC098934.4	0	0	0.0510896	0	0	0	0.0261837	0	0	0	0	0	0	0	0	0	0	0	0	0	0	0	0	0	0.0242097	0	0.0572887	0	0	0	0	0	0	0	0	0.0237551	0	0	0	0	0	0	0	0	0	0	0	0	0
LINC02091	0	0	0.229709	0.0514499	0.0236515	0	0	0	0.0129359	0	0.0238271	0.0213372	0.0135977	0	0	0.0302051	0	0	0.0297006	0.0280631	0.0128829	0	0	0.0178547	0.169325	0.0177434	0.0286202	0.0133427	0.0329614	0	0.0468012	0	0	0.0148388	0.0271074	0	0	0	0.0841918	0	0	0.0163486	0	0	0.0125637	0	0.0128827	0	0.013303
AP000757.2	5.18986	0.0351603	0	0.0273645	0.503178	0.0390905	0	0	0.0550413	0.0323997	0.0506915	0.0226971	0	0	0	0.449822	0.118218	0	0.0315935	0.0597033	0	0.0293243	0	0.0379853	0	0	0	0.0283863	0	0.0273919	0	0	0.0328172	0.0315692	0	0	0	0.0504071	0.0255879	0	0	0.0347811	0	0.0265131	1.97793	0.0333341	0.0274075	0	0
AL160408.4	0	0	0	0	0	0	0	0	0	0	0	0	0.0172704	0	0.12623	0	0.0352881	0	0	0	0	0	0	0	0	0	0	0	0	0	0	0	0	0	0.550865	0	0	0	0.122208	0	0	0	0	0	0	0	0	0	0
AL356056.1	0.0147785	0	0	0.00553249	0	0	0.00562641	0	0.00556407	0	0	0	0	0	0	0	0	0	0.0191625	0	0.0166239	0.0118575	0.0172225	0	0.00520222	0.0076319	0	0	0.0637992	0	0	0	0.00663491	0	0	0	0.0119329	0	0	0	0	0	0	0	0.0108079	0	0.00554118	0.00990406	0
AC098820.1	0.226982	0.0545904	0.158075	0.0318649	0.0878895	0.106212	0.313256	0.0483749	0.491383	0.0754563	0.0393521	0.0792895	0.662496	0.13867	0.461652	0.0748285	0.0229434	0.0646172	0.122631	0.0463481	0.202132	0.0569117	0.214922	0	0.0199751	0.0879132	0.11817	0.0771275	0.408285	0.106323	0.154591	0.207702	0.305714	0.0612684	0.380543	0.0392001	0.297823	0.13696	0.476738	0.108147	0.067749	0.0270008	0.102989	0.0617469	0.0311246	0.0517549	0.308511	0.0570432	0.164781
AC087894.2	0	0	0	0	0	0	0	0	0	0	0	0	0	0	0	0	0	0	0	0	0	0	0.0513508	0	0	0	0	0	0	0	0	0	0	0	0	0	0	0	0.0308495	0	0	0	0	0	0	0	0	0	0
AL713851.2	0	0	0	0	0	0	0	0	0	0	0	0	0	0	0	0	0	0	0	0	0	0	0	0	0	0	0	0	0	0	0	0	0	0	0	0	0	0	0	0	0	0	0	0	0	0	0	0	0
AL157912.1	0	0	0	0	0	0	0	0.0316688	0.0279726	0	0	0	0	0	0	0.0653157	0	0	0	0	0.0278582	0	0	0	0	0	0	0	0	0	0	0	0	0	0	0	0	0	0	0	0.0591361	0	0	0	0.0543356	0	0	0	0
STAU2-AS1	0.0357304	0	0.0597204	0	0	0.00955394	0.0544125	0	0.0403572	0.00791866	0.068141	0.0221891	0.304024	0	1.00771	0.00785278	0.0577864	0.0162748	0.0540514	0.0145918	0.0870828	0	0.0936887	0.00928382	0.169797	0	0.059526	0.00693776	0.197096	0	0.073005	0	0.0561449	0.0154313	0.281898	0.0061707	0.0504882	0	0.00625383	0	0.0284393	0	0	0.0194398	0.104523	0	0.0602868	0	0.124508
AL050341.2	1.91553	0.508353	2.35523	0.544005	1.85513	0.635824	1.54907	0.439212	2.66591	0.71437	0.815356	0.992676	3.54471	1.17393	2.01574	1.09167	0.961434	0.601724	4.79622	0.550289	1.97144	1.43092	2.34008	0.617847	1.62759	0.968747	1.14444	1.01577	1.01387	1.28712	0.818756	1.12532	0.652404	0.547718	1.66761	0.666192	0.949344	0.637694	1.61855	0.604245	1.53516	1.0686	1.28272	1.07332	0.888833	0.855459	1.80299	0.973856	0.88999
AC010198.1	0.0131169	0	0.0097439	0.00982089	0.0180586	0	0	0	0	0	0.0181927	0	0	0	0	0	0	0.0119492	0	0	0	0	0.0305722	0.0136326	0	0	0.0437048	0	0.0125835	0.00983072	0.0178671	0	0	0	0.0206974	0	0.0211824	0	0.0091833	0	0	0	0.0476123	0.00951533	0	0	0.0393453	0	0
AP002884.2	0.0342718	0	0.0254588	0	0	0	0	0	0	0	0	0	0	0	0	0	0	0	0.0592511	0	0	0.0274977	0	0	0	0	0	0	0	0	0	0	0	0	0	0	0	0	0	0	0	0	0	0	0	0	0	0	0
AC010624.3	0.0286321	0	0	0.0214374	0	0	0	0	0.0215598	0.025382	0	0.0355619	0	0.0763299	0.0207054	0	0.0463063	0.0260832	0.0742514	0	0	0.0229728	0.100102	0.0595157	0.100788	0	0	0	0	0.0214589	0	0	0	0	0.0225895	0	0.0231189	0.0394891	0	0	0	0.0272476	0.0519651	0	0	0.052228	0	0.0383765	0
LINC01837	0	0	0	0	0	0	0	0.0168982	0	0	0	0	0	0	0	0	0	0	0	0	0	0	0	0	0	0	0	0	0.0380324	0	0	0	0	0	0	0	0	0	0	0	0	0	0	0	0.101476	0	0	0	0
AC087241.3	0	0.0227196	0	0.0353643	0	0	0	0.0201328	0.0355661	0.0209358	0	0	0	0	0	0	0.0763893	0.0215141	0	0	0	0.0568456	0	0	0	0	0	0	0	0.0176999	0	0.0628669	0	0	0	0.0326288	0.019069	0	0	0	0	0	0	0.034264	0	0.043079	0	0	0.0182878
LINC00635	0	0	0	0	0.00308192	0	0.013636	0	0	0	0	0	0	0	0	0.00787178	0	0	0	0	0	0	0	0	0	0	0	0	0.00429506	0	0.00609847	0	0.00402005	0	0.226064	0	0.0361502	0	0	0	0	0	0	0.00324781	0	0	0.265232	0	0
TFAP2A-AS1	0.15641	0.0231493	0	0.0270249	0	0	0.00916121	0	0.00905969	0.0319976	0.0333749	0.00747179	2.33318	0.0213832	0	0	0	0	0.0832037	0	0.252634	0.0386138	0	0.0125046	0.0508231	0	0.120266	0.0280339	0.554032	0.00901731	0.0163887	0	0.129639	0	0.123401	0.016623	0.00971484	0.0165938	0.648606	0	0.114917	0.0114498	0.0109182	0	0.0351961	0	0.0270673	0	0.0279505
AC073389.3	0.0653179	0	0.0808692	0.0163016	0.179852	0.0698613	0.248675	0.018561	0.147552	0.0193012	0.030198	0.0270423	0.120634	0.0773912	0.15745	0.0382813	0.176063	0.0595031	0.583449	0.0711331	0.244914	0.174691	0.253733	0.135772	0.0919708	0.0674628	0.145091	0.118372	0.54307	0.0815898	0.0741437	0.0289793	0.0977496	0.0376129	0.0171777	0.045122	0.0175802	0	0.0609732	0	0.103978	0.0207198	0.197578	0.0631777	0.0318459	0.0397157	0.0653089	0.0291825	0.0505799
HTT-AS	0	0	0	0	0	0	0.0300986	0	0	0	0.0274128	0	0.0312879	0	0	0	0	0	0	0	0	0	0	0	0	0	0	0	0	0.0296258	0	0	0	0.0341437	0	0.0273069	0.0319175	0	0	0	0	0	0.035871	0	0	0	0.0296426	0	0
LINC00102	0	0	0.0225709	0	0	0	0.0231355	0	0	0	0.0105355	0	0.0120248	0	0.0109862	0	0	0	0.026265	0	0.0113927	0	0	0	0.0106956	0	0.0253096	0	0	0.011386	0	0.0202206	0	0	0	0	0	0	0.0212724	0	0	0	0	0.0110207	0	0	0.0113925	0	0
ERICD	0.670789	0.127107	0.0452996	0.167411	0.230876	0.0326112	0.185731	0.138628	0.0841832	0.090098	0.133916	0.0694283	0.136758	0.108379	0.154345	0.205501	0.427368	0.13888	0.149355	0.124519	0.106704	0.130473	0.236885	0.116194	0.100175	0.052486	0.372505	0.149981	0.331507	0.0380861	0.290726	0.0811651	0.319406	0.0702307	0.136315	0.0842518	0.0328258	0.182226	0.0711556	0.0968487	0.16179	0.14508	0.0830066	0.132711	0.28988	0.0556178	0.266754	0.177091	0.173145
AC005480.1	0.0154496	0.0148629	0.00382558	0.00385581	0.00354503	0	0.00392127	0.0131706	0	0.0045653	0	0.00319814	0.00815242	0.00915264	0.0074483	0.00905464	0.00832881	0	0.0489687	0.00841253	0.00386195	0.0206598	0	0.0107047	0	0.0159569	0.00857954	0.00799957	0	0	0.00350743	0	0.00924825	0.00444827	0.0162521	0	0	0	0.00360548	0.0196294	0.00819797	0.0147025	0	0.00373584	0.00753248	0.00939391	0.00772373	0.013805	0
AC109826.1	0.106583	0.00932142	0.0863733	0.00725465	0.0733691	0.0103634	0.110667	0.00826011	0.0875526	0.0171791	0.0268778	0	0.0306773	0.0258308	0	0.0255543	0.0470116	0.00882682	0.0167516	0.0158281	0.036331	0.373163	0.169377	0.0503518	0.0545726	0.0100076	0.274419	0.0602043	0.046477	0.0363096	0.0461942	0.0257931	0.0522013	0.00836936	0.0229336	0.013387	0	0.0267271	0.0339183	0.0553987	0	0	0.0175855	0.0632604	0.141722	0.00883725	0.00726604	0.038961	0.14256
AC006942.1	0.939573	0.112986	0.523472	0.0879347	0.188643	0.20936	0.476946	0.133496	0.0884365	0.694101	0.271492	0.0729362	0.402831	0.765354	0.254796	0.309747	0.25326	0.0713275	0.710671	0.191854	0.587165	0.251287	0.501855	0.366193	1.35053	0.404344	0.978315	0.273654	1.08915	0.264068	0.266632	0.468963	1.05457	0.304339	0.339755	0.108177	0.252885	0.539938	0.328903	0.223832	0.685524	0.745118	0.177631	0.227197	0.572613	0.285647	0.411007	0.472252	0
AL450267.1	0	0	0	0.0293116	0	0	0	0	0	0	0	0	0	0	0	0	0	0.0356637	0	0	0	0	0	0	0	0	0	0	0	0	0	0	0	0	0	0	0	0	0.0274086	0	0	0	0	0	0	0	0	0	0
AC015977.2	0	0	0	0	0	0	0	0	0	0	0	0	0	0.0319051	0	0	0	0	0	0	0	0	0	0	0	0	0	0	0	0	0	0	0	0	0	0	0	0	0	0	0	0	0	0	0	0	0	0	0
AC016813.1	0	0	0	0.0207374	0	0	0.0210895	0	0	0	0.0192076	0	0	0	0	0.0486979	0	0	0	0	0	0	0	0	0	0	0	0	0	0	0	0	0	0	0	0	0	0	0	0.0527858	0	0	0	0	0	0	0	0	0
AC097382.1	0	0.0331376	0	0.0257902	0	0.0368417	0.0786841	0	0.0259374	0.0610715	0	0	0	0	0.0747288	0	0	0	0	0.0281343	0	0	0	0	0.0242506	0.0355768	0	0	0	0.025816	0	0	0	0.059506	0	0.0237953	0	0.0475072	0.0241159	0	0.0548335	0.0327801	0.0625164	0	0.0251911	0.0628327	0	0	0.0533472
AL078599.2	0	0	0	0.032361	0	0	0	0	0	0	0	0.0268413	0	0.038408	0	0	0	0	0	0.0353023	0.0324125	0	0	0	0	0	0	0	0	0	0.0294371	0.0575279	0	0	0	0.0298578	0.0348992	0	0	0	0	0.0822635	0	0.0627083	0	0.0394205	0	0	0
AP001458.1	0	0	0.164375	0	0	0	0	0	0	0	0	0	0	0.196632	0.160017	0.194527	0	0	0	0	0	0.532619	0	0	0.155784	0	0	0	0	0	0	0	0	0	0	0	0.178669	0	0.309836	0.421713	0.352245	0	0	0	0.161825	0	0	0	0.171349
AC084082.1	0.0513644	0.0164712	0	0.0128192	0	0	0.0391104	0.0145959	0.167601	0.045534	0	0.0744288	0.0948636	0.0912877	0.0990517	0	0	0.0311945	0.044401	0	0.0513584	0.0549492	0.0399059	0.0177946	0.108485	0.0707347	0	0.0797871	0.213528	0.102656	0.0116609	0	0.0153736	0.0443667	0.135081	0.0236552	0.124422	0.0708413	0.179804	0.0652609	0	0.0977614	0.248593	0.037261	0.0125214	0.0624628	0.231108	0.0688453	0.0662913
MGC16275	0.177583	0.0155308	0.0599625	0.0181309	0.1278	0.043167	0.301165	0.00688124	0.188422	0.0286227	0.0447821	0.0451151	0.466403	0.129113	0.134257	0.0283846	0.0391639	0.0147067	0.0767539	0.0395576	0.0907987	0.181341	0.141103	0.0167786	0.113657	0.0666959	0.968229	0.08777	0.0619497	0.0483974	0.0549757	0.0429748	0	0.027889	0.076421	0.0557614	0.0782118	0.0556637	0.231702	0.0307673	0.0256991	0.0691346	0.234399	0.128823	0.171194	0.0662584	0.0907968	0.0973716	0.0875088
NALT1	0.916832	0.216003	0.180692	0.0840553	1.59713	0.0400247	0.341929	0.0478525	0.197248	0.182457	0.155709	0.232395	4.04312	0.116389	0.270617	0.246735	0.242087	0.0852258	1.34246	0.0916951	1.69781	0.375314	0.327078	0.0583396	0.764028	0.115952	0.218203	0.159855	0.556451	0.378627	0.0637172	0.323753	0.638427	0.0484853	0.0295242	0.168033	0.347484	0.206447	0.392991	0.356595	0.744637	0.32051	0.152815	0.176453	0.164205	0.204784	0.336749	0.175551	0.0579562
LINC01277	0.00819542	0.102494	0.0243519	0.165674	0.276434	0.0964202	0.218408	0.111784	0.0431977	0.0581212	0.0966178	0.218848	0.201091	0.247611	0.320034	0.129685	0.212069	0.164248	0.425062	0.0736317	0.411772	0.0657554	0.324725	0.1448	0.0576977	0.211613	0.0273067	0.0891127	0.141519	0.0675645	0.0446533	0.0654484	0.0441526	0.077868	0.0581926	0.164182	0.132347	0.0452122	1.09017	0.234285	0.0130461	0.124786	0.0818073	0.148629	0.233748	0.142019	0.159789	0.0549229	0.0634625
AC009268.2	0.0445458	0.0857081	0.330909	0.200114	0.245313	0.238221	0.407022	0.227849	0.0335427	0.315915	0.308918	0.331963	0.317329	0.277093	0.225494	0.274126	0.0720433	0	0.924162	0.327454	0.334054	0.071482	0	0.138892	0	0.184034	0	0	0.213672	0.166929	0.151694	0.237161	0.279987	0.192385	0	0	0.395651	0.245749	0.0623741	0.254689	0	0.127175	0.56593	0.387776	0.195465	0.0812563	0.300643	0.119412	0.103484
AC092902.2	0.196559	0.0523645	0.101086	0.0294335	0.106163	0.00646863	0.181901	0.0541361	0.109298	0.0643373	0.0356504	0.030047	0.4811	0.0322463	0.544514	0.0398763	0.0880315	0.0716241	0.172525	0.0296388	0.181418	0.0655093	0.049337	0.0220001	0.0766423	0.0468491	0.0957195	0.0563677	0.104437	0.0589259	0.0535482	0.0362241	0.0570206	0.0313441	0.16462	0.00835593	0.122085	0.0291945	0.173604	0.0633947	0.0433243	0.0604329	0.0548829	0.0548418	0.0464419	0.0193062	0.0861715	0.0283719	0.0117083
AC015795.1	0	0	0	0	0	0.0378668	0.0269578	0	0	0	0	0	0	0	0.102411	0.0311243	0	0	0.0306045	0	0	0	0	0	0.0249254	0	0.117965	0	0	0.0265344	0.0482256	0	0	0	0.0279324	0	0	0	0.0495738	0	0	0	0	0	0.0258921	0	0.0265495	0	0
AC091979.2	0	0	0	0	0	0	0	0	0	0	0	0	0	0	0	0	0.153849	0	0	0	0	0	0	0	0	0	0	0	0	0	0	0	0	0	0	0	0	0	0	0.181297	0	0	0	0	0	0	0	0	0
AC068057.1	0	0	0	0	0	0	0	0	0	0	0	0	0	0	0.0207638	0	0	0	0	0	0	0	0	0	0	0	0	0	0	0	0	0	0	0	0	0	0	0	0	0	0	0	0	0	0	0	0	0	0
AC106820.4	0.148621	0.0802064	0.969393	0.132988	0.224575	0.0697866	0.0690027	0.145239	0.0300248	0.0771223	0.0276519	0.0517757	0.229534	0.13529	0.117961	0.0382404	0.11725	0.0363242	0.542091	0.100664	0.377851	0.101794	0.0971605	0.293859	2.92716	0.0711346	0.0301949	0.0929074	1.10237	0.114104	0.0814709	0.0434225	0.143213	0.109587	0.377506	0.0575943	0.430255	0.304965	0.423818	0.297061	0.236587	0.0827908	0.470392	0.394439	0.0212079	0.2711	0.12776	0.0825955	0.148771
AC055758.2	0	0	0	0	0	0	0	0	0	0	0	0	0	0	0.0131678	0.0160076	0	0	0	0	0.013655	0	0.0636603	0	0	0	0	0	0	0	0	0	0	0	0	0	0	0	0.0127482	0	0	0	0	0	0	0	0	0	0
AL035420.3	0.443931	0	0.188443	0	0	0	0.0965779	0	0.0477539	0.11244	0	0	0	0	0.0458616	0.0557523	0.102566	0	0.219284	0.0517987	0	0	0	0	0.0892967	0.0655012	0.52827	0	0.9126	0	0.0863854	0.08441	0	0.109558	0.0500348	0.0876201	0.102414	0.174933	0.0444002	0	0	0	0	0	0.0463799	0	0	0.170004	0
NCBP2-AS1	0.0362232	0	0	0.027121	0.299221	0	0.165489	0	0	0.128446	0	0.0224951	0.172028	0.0643779	0.20956	0.0955329	0.0585833	0	0.12525	0.0295861	0.0271642	0.116254	0.126641	0	0.051004	0	0.120694	0.0281337	0.0347502	0.162889	0.0246706	0.0482128	0	0	0.0857357	0.0250232	0.0584965	0.0999173	0.0760808	0	0.057663	0.0344716	0.0986135	0	0.026491	0.066075	0.162982	0.145653	0
AL049794.2	0.0557738	0	0.0414316	0	0	0	0	0	0.167989	0	0.0386783	0.0346363	0.176584	0.0495622	0	0	0	0.0508086	0.0964251	0	0.0836509	0.0447497	0	0	0	0	0	0	0	0	0.113958	0	0	0	0	0	0.0450343	0	0.0390479	0.106295	0	0.106154	0.0506126	0	0	0	0.0418246	0	0.0431893
LINC02171	0	0	0	0	0	0	0	0	0	0	0	0	0	0	0	0.0173248	0	0	0	0	0	0	0	0	0	0	0	0	0	0	0	0	0	0	0	0	0	0	0	0	0	0	0	0	0.0144123	0	0	0	0
AL109976.1	0.0824623	0.00689831	0.0319603	0	0.0123402	0.0076694	0.0382196	0.00305645	0.0161983	0	0.0248636	0.0066796	0.0113514	0.00318601	0.00518548	0.0535823	0.011597	0.00653228	0.0402903	0.00585677	0.0241981	0.0489031	0.00835649	0.00372628	0.673948	0.00740609	0.0298652	0.0111385	0.0550324	0	0.36872	0.0190881	0.0257544	0.00309687	0.00848599	0	0.00868484	0.00494483	0.0326316	0	0.0114148	0	0.0130142	0.00260088	0.068173	0.00327	0.00537723	0.00961102	0.0194344
LINC02598	0	0	0	0	0.0249351	0.0387427	0	0	0	0	0	0	0	0	0.0523899	0	0	0	0	0	0	0.0581269	0	0	0	0	0	0	0	0.0271482	0	0	0	0	0	0	0	0	0	0	0	0	0	0	0	0	0	0	0
AC135050.6	12.306	6.11362	5.92099	6.06858	4.96775	5.52976	7.8734	4.72887	3.7917	6.70781	5.15403	6.27097	9.8683	7.20257	9.98963	10.2976	9.71165	7.57996	17.1786	4.83865	10.541	8.38288	4.2992	4.61778	5.36506	4.95054	7.49179	4.81027	12.0639	3.24924	13.3514	4.73098	5.29516	4.0006	5.22625	3.925	5.82705	4.12238	9.82214	5.85043	4.37232	3.92074	5.98681	6.73927	9.31481	5.55047	3.89726	4.1506	3.79506
TEX26-AS1	0.0031271	0	0.00232297	0	0	0	0	0.0106633	0.00470937	0	0	0	0	0.00833649	0	0.00549816	0.00505742	0	0	0.00255413	0.00234505	0.010036	0.0072885	0.00325005	0	0.00322978	0.00520966	0	0	0.00703101	0.00212978	0	0	0.00810323	0	0	0	0.00431287	0.00437864	0	0	0	0	0.00907391	0.00228693	0	0.002345	0	0
AL034345.2	0	0	0	0	0	0	0	0	0	0	0	0	0.0132838	0	0	0.0442617	0.0271424	0	0	0	0	0	0.0195582	0	0	0	0	0.0130347	0	0	0	0	0	0	0	0	0	0	0.0117498	0	0	0.0319424	0	0	0.0122737	0	0	0	0.0129959
AC091979.1	0	0	0.02142	0	0	0	0.0439115	0	0	0	0	0	0.13694	0	0.0417042	0	0	0	0	0	0	0	0	0	0.0203004	0	0	0	0	0.0432218	0.0196386	0	0	0.0249065	0.113748	0	0.0698478	0	0.0201876	0	0	0	0.0261666	0	0	0	0	0	0
LINC01012	0.0174992	0.00561155	0	0.00873468	0	0	0.093271	0	0	0	0	0	0.0138509	0	0.00421821	0.0102559	0	0.00531379	0.0151269	0.00476429	0	0.0234006	0.00679773	0	0	0	0.136048	0.00453041	0.0111918	0.00437171	0.00397274	0	0.109989	0	0	0.00402952	0	0	0	0	0	0	0	0	0.0255953	0	0	0.0234547	0.00451693
PRMT5-AS1	0.0254946	0	0.0236733	0.0286325	0.0263247	0.013634	0.0485309	0.00543347	0.0431938	0.0113003	0.0176801	0.00395813	0.0756728	0.0169914	0.0599187	0.0112063	0.0515401	0.0290312	0.077134	0.00520581	0.0191187	0.0204554	0.141126	0.0198727	0.0314104	0.00658294	0.0424733	0.00990053	0.0489158	0.00477686	0.0303864	0.0169666	0.00572297	0.0110107	0.0603425	0.0396266	0.0205855	0	0.00892453	0.0364411	0.0202922	0.0363927	0.0231354	0.0138708	0.0372898	0.0290655	0.0238979	0.0170856	0.0345487
AC015802.4	0.0817567	0.0786518	0	0.0204043	0.253256	0.0874435	0.186756	0	0.184687	0.0483176	0.0283485	0.118468	0.248062	0.0605428	0.49269	0.0359367	0	0.0124131	0.212019	0.0445177	0.132839	0.0983955	0.0952774	0.0141619	0.172676	0	0.0227007	0.0423324	0.0915043	0.0919113	0.0649625	0.108818	0.0367052	0.0117698	0.23651	0	0.110024	0.0563791	0.324354	0.0519379	0.0650735	0.0389017	0.210208	0.0494237	0.0498258	0.0621388	0.0919636	0.0547905	0.052758
AC097381.3	0	0	0.0327328	0	0	0	0.0671029	0.0375638	0.0331797	0	0	0	0	0	0	0	0	0	0	0	0	0	0.102702	0	0.0310219	0	0	0	0	0	0	0	0	0	0	0	0	0	0	0	0.140288	0	0.0799722	0.0319649	0.1289	0	0	0	0
AC008609.1	0.00704409	0.0203297	0	0	0	0	0	0.01201	0	0	0	0	0	0	0	0	0	0.006417	0.00608913	0	0.00528245	0	0	0	0	0	0.0234705	0	0	0	0	0	0	0	0	0	0	0	0	0	0	0	0	0	0	0	0.00528234	0	0
AC093677.2	0.0109272	0.0735857	0.0974076	0.0654515	0	0.0467492	0.0499219	0.1211	0.065825	0.125929	0.0985123	0.0950036	0.0778418	0.116523	0.0237062	0.172913	0.14138	0.149317	0.132242	0.0535503	0.0491668	0.131511	0.0891403	0.0908549	0.207712	0.203149	0.0182045	0.0509216	0.0628974	0.0737067	0.0446533	0.203617	0.0686818	0.103824	0.0517268	0.037743	0.0970546	0.0753537	0.122405	0.104127	0.121764	0.0519942	0.0198321	0.166465	0.0399569	0.129561	0.196663	0.131815	0.0423083
AC099566.1	0	0	0	0	0	0	0	0	0	0	0	0	0	0	0	0	0	0	0	0	0	0	0	0	0	0	0	0	0	0	0	0	0	0	0	0	0	0	0	0	0	0	0	0	0	0	0	0	0
LINC01800	0	0.00990607	0	0	0	0	0	0	0	0	0	0	0.00815036	0	0.00744642	0.027157	0	0	0	0	0	0.00826183	0.0360001	0	0	0	0	0.00799754	0	0.0154348	0	0.0137054	0	0	0.008124	0	0	0	0.00720914	0	0	0.0195984	0	0	0.00753057	0.00939154	0.00772178	0	0.00797374
AC106900.1	0	0	0.0331634	0	0	0	0.0339929	0	0.0672325	0.0395759	0.0309596	0.110897	0	0	0.0322841	0	0	0.0406692	0.115774	0	0.0669574	0.0358194	0	0	0.0314301	0.0461094	0	0	0	0	0	0	0	0	0	0.09252	0	0.123144	0	0	0	0	0	0	0.032649	0	0.033478	0.059837	0
AL139147.1	0	0	0	0	0	0	0.013409	0.0150125	0.0265208	0	0.0244249	0	0	0	0.0127349	0	0.0284808	0	0	0.0143835	0	0	0	0	0.012398	0	0.0293382	0.0136775	0	0	0	0	0	0	0	0	0	0	0	0	0	0	0	0	0.0257577	0	0	0	0
AC104237.3	0	0	0	0	0	0	0.0363015	0	0	0	0.0330622	0	0.113208	0	0	0	0	0.0434312	0	0	0	0	0	0	0	0	0	0	0	0	0	0	0	0	0.037614	0	0	0	0	0	0	0	0	0	0	0	0	0	0
AC078788.1	0	0	0	0.024041	0	0	0	0	0.0241782	0	0.0445349	0.039881	0	0	0	0	0	0	0.0277564	0	0	0.0257628	0.112259	0.133488	0	0	0	0.0748161	0.0616077	0	0	0	0	0	0.0253331	0.0221814	0	0	0	0	0	0	0	0.0465861	0.0704477	0.0292856	0	0	0
AL442125.1	0.175599	0.029126	0.0224904	0.0226681	0.0291774	0.019429	0.101433	0.0671054	0.223415	0.0966208	0.0419916	0.0188017	0.0527204	0.00538078	0.100713	0.0425853	0.0293788	0.0220644	0.235542	0.014837	0.027245	0.0291499	0.0705653	0.00629323	0.1151	0.143842	0.121053	0.0376232	0.0116179	0.00907631	0.00824799	0	0.016311	0.0104604	0.00477726	0.0167317	0.024446	0.00835121	0.0211964	0.01154	0.0867517	0.0460989	0.0164845	0.0131777	0.0354264	0.0165679	0.0363259	0.0243477	0.046889
GS1-600G8.3	0	0.026124	0	0	0	0	0	0	0	0	0	0	0	0	0	0	0	0	0	0	0	0	0	0	0	0	0	0	0	0	0	0	0	0	0	0	0	0	0	0	0	0	0	0	0	0	0	0	0
LINC00692	0	0	0	0	0	0	0	0	0	0	0	0	0	0	0.0157618	0	0	0	0	0	0	0	0	0	0	0	0	0	0.0209097	0	0	0	0	0	0	0	0	0	0	0	0	0	0	0	0	0	0	0	0
AL078459.1	0.0804641	0.103211	0.0199243	0.0200817	0.0430806	0.028687	0.176996	0.0685948	0.0403926	0.0634049	0.0620008	0.0610738	0.0353826	0.119171	0.038792	0.0628774	0.0144593	0.0325782	0.038642	0.00730232	0.0268182	0.0573865	0	0.0278759	0.0125886	0.0369361	0.0148946	0.0347192	0.0257307	0.0201018	0.0243564	0.0237994	0.0561942	0.00772245	0.0211609	0.0617612	0.0288757	0.0123306	0.0375559	0.0340778	0.0142321	0.0510489	0.00811313	0.0389138	0.0261536	0.0163084	0.0134088	0.0359495	0.00692318
AC022733.2	0	0	0	0.0574087	0.0263908	0	0.145958	0.0326827	0	0	0.0265868	0.0238084	0	0.0340681	0	0	0	0.0698499	0	0.0626266	0	0	0	0	0	0.0395968	0	0.0297762	0	0	0	0.0510275	0.034424	0.0331149	0	0	0.0928673	0.0528753	0.0536816	0.14613	0.0610293	0	0	0.0278113	0.0841127	0	0	0	0.0890626
NPSR1-AS1	0.00286482	0	0	0.00214495	0	0	0	0	0.00431438	0	0.0119203	0	0.181405	0	0.96956	0.0025185	0.00463324	0	0.101534	0.00467981	0	0	0.0200316	0	0	0.00295889	0.1575	0.00222504	0.00549666	0	0.0039023	0	0	0	0.0678067	0	0.0485769	0	0.138393	0.00545983	0	0.0027263	0	0	0.0377122	0	0.483372	0.00383981	0.113139
AP004247.2	0	0	0	0	0	0	0	0	0	0	0	0	0	0	0	0	0.01742	0	0	0	0	0	0	0.0111946	0	0.0111248	0	0	0	0	0.00733591	0	0	0	0	0.00744076	0	0.0148554	0	0	0	0.0205006	0	0	0	0	0	0	0
AC087521.3	0.0178105	0.0514024	0.0132306	0.0133351	0.0490411	0.0380987	0.108492	0	0.067056	0.0315776	0.037054	0.0442424	0.126876	0.0791347	0.0772786	0.0939448	0.115219	0.0811248	0.0615838	0.0436414	0.186989	0.0714508	0.0830238	0.0555324	0.012539	0.0367907	0.0593437	0.0691651	0.0341726	0.0400454	0	0.0237057	0.0319845	0.0461523	0	0.0123036	0.115048	0.0245641	0.0623468	0.135775	0.0850566	0.0338986	0	0.0516808	0.104203	0.0812208	0.0667802	0.023872	0.0275837
AC018521.7	0	0	0.0103331	0.00520739	0.014363	0.00743882	0.0158874	0	0.0104742	0	0	0.00431919	0.0165151	0	0.00502957	0.00611428	0	0.00633589	0.0180365	0	0	0.00558034	0	0	0.00489652	0	0.0115869	0	0.0200167	0.0052126	0	0	0.00624502	0	0	0	0.00561582	0	0	0.0132551	0	0	0.00631144	0	0.00508642	0	0.0156467	0	0
LINC00879	0	0	0	0	0.00745796	0	0.684706	0	0	0	0	0	1.0462	0	0.783479	0	0	0	0.786693	0.00884905	0	0	0.151511	0	0	0	0	0	0	0	0	0	0	0	0	0	0	0	0.121362	0	0	0	0	0	0	0	0	0	0.268468
LINC02578	0.0795212	0	0	0	0	0	0	0	0	0	0	0	0	0	0	0	0	0.072442	0	0	0	0	0	0	0	0	0	0	0	0	0	0	0	0	0	0	0	0	0	0	0	0	0	0	0	0	0	0	0
AC090559.2	0	0	0	0	0	0	0	0	0	0	0	0.0294006	0	0.0420702	0	0	0	0	0.0409246	0	0	0	0.165517	0	0	0.0488974	0	0	0	0	0	0	0.0850194	0	0	0	0	0	0	0	0	0.180214	0.0429618	0	0	0	0	0	0
AL365199.1	0	0	0	0	0	0	0	0	0	0	0	0.00737589	0	0	0	0	0	0	0	0.00970092	0	0	0	0.0123441	0	0.0122672	0.039574	0	0	0	0	0	0	0.0102591	0	0	0	0.0163808	0	0	0.018907	0	0	0	0	0	0	0	0
HOXA10-AS	0	0	0	0	0	0	0	0	0	0.0109109	0	0	0	0.0218745	0	0	0	0	0.138312	0	0	0.00987524	0	0	0	0	0.102524	0	0	0	0	0	0	0	0	0	0.00993804	0	0	0	0	0	0	0	0	0	0	0	0
AC015967.1	0	0.0411435	0.0953101	0	0.147201	0	0	0	0.0322038	0.0379131	0.0889763	0.0796782	0.0338514	0.0760092	0.092783	0.0375977	0.0691676	0	0	0.0698629	0.032072	0.102943	0.0498405	0	0	0	0	0.0996501	0.0410287	0.0320531	0	0	0	0	0	0	0.0345326	0.11797	0.0299422	0	0	0	0	0.0310248	0	0.0780129	0	0.0573228	0
AP000919.3	0.107522	0	0	0.0268345	0	0	0.0272901	0	0.0269877	0	0	0	0	0.0318489	0.0518365	0	0	0.228549	0.092945	0	0	0	0.0835354	0	0	0.0370174	0	0	0	0	0	0	0	0	0.0282767	0.0495177	0	0	0	0	0	0	0	0.0259996	0.0524223	0.0326885	0.0268767	0	0
AC084782.3	0	0	0	0	0.0242448	0	0.0268179	0	0.0265208	0.0624451	0	0.0437449	0	0.0625958	0.0254698	0.0928884	0.113923	0.12834	0.0304456	0.0287671	0.0264123	0.113036	0.0410451	0	0	0.036377	0.0586763	0.0273549	0.0675766	0	0	0	0.0632497	0	0.0277875	0.0243305	0.170632	0.0485757	0.0246583	0	0.0560668	0.0335174	0	0.0255498	0	0.032123	0	0	0.0272735
AC073167.1	0	0.0675321	0	0.0262793	0	0	0.0801763	0	0.0528586	0	0.0243406	0	0.0277815	0	0.101528	0	0	0.0319744	0.0303407	0	0	0	0	0.036479	0.0247105	0	0	0	0	0	0	0	0	0	0.0276917	0	0.0283405	0	0	0	0	0	0.127404	0	0	0	0	0	0
AC131011.1	0	0.0291433	0	0.136089	0.479629	0.226806	1.13026	0.154951	0.114055	0.268551	0.189075	0.169316	0.551495	0.430719	0	0.239685	0.293962	0.303566	0.261869	0.222688	0.772401	0.24306	0.211822	0.220394	0.0213276	0.156443	0.35328	0.164699	2.12152	0.31786	0.0412645	0.564492	0.462419	0.2355	0.239005	0.0837085	0.293527	0.0417809	0.254509	0.404142	0.24112	0.201803	0	0.153831	0.310166	0.386814	0.795102	0.0406037	0.30496
AC025043.1	0.0325719	0.0313349	0.0241961	0.0243872	0.0448432	0	0.0248012	0.0555344	0.0245264	0.0288746	0.0225881	0.0202276	0.103125	0.0578886	0.0235545	0	0	0.0593444	0.0281561	0	0	0	0.0379585	0	0.0229314	0	0	0.0505957	0	0	0.0221838	0.043353	0	0	0	0.0450017	0.0263	0	0	0	0.103701	0.0309969	0	0	0.0476414	0	0.0488511	0.0873142	0
AF131215.3	0	0	0	0	0	0	0	0	0	0	0	0	0	0	0	0	0	0	0	0	0	0	0	0	0	0	0	0	0	0	0	0	0	0	0	0	0	0	0	0	0	0	0	0	0	0	0	0	0
AL590094.1	0.381245	2.04987	2.26566	1.77915	4.66637	1.8098	0.89871	1.27332	2.05671	1.72225	1.51389	1.53082	1.39307	1.94917	2.24336	1.50591	1.83285	1.53195	1.24149	2.25225	1.37075	1.3325	1.1016	1.37325	1.01847	1.96342	1.5313	1.50486	4.39893	1.57739	1.04218	2.82217	2.49943	1.41195	3.75365	0.966879	0.535548	2.10324	2.20478	1.95083	1.57959	2.59434	1.67295	1.38282	1.64615	1.00504	4.1905	1.46998	0.804785
AC018563.1	0	0.0140894	0.0326386	0	0.0100817	0	0	0	0	0	0	0	0.0115923	0	0.0105911	0	0	0	0.0253203	0	0.0219659	0	0	0	0	0	0	0	0.0140501	0	0	0	0	0	0	0	0	0	0	0	0	0	0	0	0	0	0.0219654	0	0
AP000265.1	0	0	0.0254588	0.00855332	0	0.0122185	0	0	0	0	0	0	0.00904223	0	0.00826126	0.0502146	0	0.0104069	0	0.00933074	0.0257008	0.0183318	0.0665658	0.0118731	0.00804271	0	0	0	0.0219188	0.00856189	0.00778051	0	0	0	0	0.0236751	0.00922419	0	0	0.0217719	0	0	0.0207335	0	0.0501278	0	0.0257003	0	0.00884629
AC010445.1	0	0	0	0	0	0	0	0	0	0	0	0	0	0	0	0	0	0	0	0	0	0.0371219	0	0	0	0	0	0	0	0	0	0	0	0	0	0	0	0	0	0	0	0	0	0	0.0338362	0	0	0	0
AC005954.1	0.120816	0.0581137	0.044874	0	0.166332	0	0.0919926	0	0	0	0.0837838	0	0	0.16104	0.0436842	0.0531053	0	0	0.104437	0.0493394	0	0	0	0	0	0	0	0.0469173	0	0	0	0	0.0542409	0	0	0	0.048776	0	0.0422922	0	0	0	0.109636	0	0.0883558	0	0.0905992	0	0.0467777
AC002375.1	0	0	0	0	0	0	0	0	0	0	0	0	0	0	0	0.0616058	0	0	0	0	0	0	0.0408332	0	0	0	0.0583733	0	0	0	0	0	0	0.0302651	0	0	0	0.0483249	0	0	0	0	0	0	0	0	0	0	0
AC109462.2	0	0.0319483	0	0	0	0	0	0	0	0	0	0	0	0	0	0	0	0	0	0	0	0	0	0	0	0	0	0	0	0	0	0	0	0	0	0	0	0	0	0	0	0	0	0	0	0	0	0	0
MIR181A2HG	0.43052	0.0295835	0.342656	0.0230242	0.0846737	0	0.023415	0.0262152	0.0463112	0.0817823	0.0853026	0.0381942	0.0973611	0.109306	0.022238	0.13517	0.198935	0.0840414	0.265824	0.0251169	0.0922434	0.0986927	0.143348	0	0.0216497	0.0635223	0.153693	0.0716517	0.0885029	0.0230473	0.146607	0	0.027612	0.026562	0.0242616	0.0212433	0	0.042412	0.0430588	0	0	0.0877933	0.0279057	0.0669235	0	0.0280469	0	0.0824341	0.16669
SPACA6P-AS	0.0102763	0	0	0	0	0	0.00391236	0	0	0	0.00356324	0	0	0.00456592	0	0	0	0	0	0.00419671	0	0.00412258	0.0119758	0	0.0108522	0	0.00856005	0	0	0	0	0	0	0	0	0.00354948	0	0	0.00359729	0	0	0	0	0	0	0	0	0	0
AC027315.1	0	0	0	0	0	0	0.198304	0	0	0	0	0	0	0	0	0	0	0	0	0	0	0	0	0	0	0	0	0	0	0	0	0	0	0.0374926	0.0342455	0	0	0	0	0	0	0	0	0	0	0	0	0	0
AC104564.4	0	0	0	0	0	0	0	0	0	0	0	0	0	0	0	0	0	0	0	0	0	0	0	0	0	0	0.365988	0	0	0	0	0	0.0657524	0	0	0	0	0	0	0	0	0	0	0	0	0	0	0	0
LINC01925	0	0	0	0	0.028027	0	0	0	0	0	0	0	0	0	0	0	0	0	0	0	0	0	0	0	0	0	0	0	0	0	0	0	0	0	0	0	0	0	0	0	0	0	0	0	0.0297759	0	0	0	0
AC091133.2	0	0	0	0	0	0	0	0	0	0	0	0	0	0	0	0	0	0	0	0	0	0	0	0	0.0334863	0	0	0	0.04563	0	0	0	0.0427083	0	0	0	0	0	0.0333002	0	0	0	0	0	0	0	0	0	0
AC018809.2	0.670948	0.317611	0.541927	0.267124	0.718453	0.38159	0.571699	0.186119	0.445074	0.325717	0.332352	0.241403	0.261319	0.487389	0.58532	0.271514	0.266973	0.271653	0.363643	0.213116	0.335435	0.303345	0.366131	0.354199	0.318658	0.302491	0.301624	0.244012	0.945065	0.235464	1.0735	0.262239	0.176911	0.289771	0.541954	0.224391	0.606249	0.330488	0.846276	0.304454	0.525558	0.22297	0.309262	0.316756	0.327122	0.296257	0.459217	0.214117	0.511312
AP001627.1	0.0232126	0.0669931	0.0172435	0.0347595	0.0319578	0.0744815	0	0.0197885	0.0262184	0.0308665	0.0402439	0.021623	0.0459329	0.030941	0.0251794	0.0102032	0	0	0.0100328	0.00947969	0.130555	0.204869	0.0541028	0.0120626	0.0326844	0.0119874	0.077343	0	0.0668061	0.0173971	0.0474283	0	0	0.0100251	0.0549412	0.0160354	0.0656001	0.0160073	0.0893827	0.0221195	0	0.0662704	0.0105323	0.176809	0.033952	0.232882	0.0261105	0	0.053925
AC109449.1	0.132818	0.0232317	0.0717558	0.00904034	0.0166234	0.0129142	0.137907	0.0205866	0.181839	0.0642229	0.0334936	0.00749838	0.105128	0.0429186	0.122243	0.0743034	0.0195278	0.0109995	0.208749	0	0.0633831	0.0678147	0.323638	0.0752948	0.102008	0.0124709	0.100578	0.0562674	0.0579171	0.045247	0.0411176	0.0160709	0.0216835	0.0208589	0.0952619	0.0417053	0.0292482	0	0.185975	0.0230116	0.019221	0	0.0328712	0.0262772	0.150116	0.0330375	0.117709	0.113286	0.14025
PIK3IP1-AS1	0.032729	0.0944581	0.121564	0.0980194	0.157708	0	0.174446	0	0.0985788	0.0290139	0.0453941	0.0406504	0.0518111	0.0290839	0.260349	0.143862	0.317593	0.089446	0.226335	0.160393	0.147263	0.367638	0.343274	0	0	0.135215	0.218102	0.203359	0.0627963	0.0981176	0.0222908	0.0435621	0	0	0.0774654	0.0452188	0.132134	0.0451395	0.0458279	0	0.0521006	0.186878	0.148501	0.0949697	0.239356	0.0597012	0.0490867	0.219338	0.152065
AC090971.5	0.0694793	0	0	0	0.0478276	0	0	0	0	0.0615926	0	0	0	0	0	0	0	0	0	0	0	0	0	0	0	0	0	0	0	0	0	0	0	0	0	0	0	0	0	0	0	0	0	0	0	0	0	0	0
AL117209.1	0.0245863	0.165568	0.182639	0.0736329	0.152321	0.184075	0.299532	0.0628786	0.148106	0.217954	0.0682008	0.0610738	0.486511	0.196632	0.355593	0.108071	0	0.17918	0.446315	0.0401627	0.165938	0.138086	0.544393	0.178871	0.276949	0.101574	0.2048	0.0954779	0.047173	0.05528	0.117215	0.359966	0	0.0849469	0.0775901	0.0849217	0.377189	0.0678183	0.172131	0.187428	0.273969	0.187179	0.2008	0.124849	0.0179806	0.11212	0.239683	0.26363	0.0951937
AC105935.2	0	0	0.0555975	0	0	0	0.028494	0	0.0281783	0	0	0	0	0	0	0.0657959	0	0	0.0323485	0	0	0	0	0	0	0.0386505	0	0	0	0	0	0	0	0	0	0	0	0	0.0261994	0	0	0	0	0	0	0	0	0	0
AP000470.1	0	0	0	0	0	0	0	0	0	0	0	0	0	0	0	0	0	0	0.101573	0	0	0	0	0	0	0	0	0	0	0	0	0	0	0	0	0	0	0	0	0	0	0	0	0	0	0	0	0	0
AP002360.3	0.0423231	0	0.0943193	0.0316882	0.728352	0.045267	0.322261	0	0.350559	0	0.0587009	0.0262833	0.569491	0.0752191	0.214243	0.148827	0.136897	0	0.95122	0.0345683	0.285648	0.237704	0.493224	0.0879743	0.119186	0	0.141018	0.0328714	0.121806	0.0634398	0.230601	0	0.266017	0.0365572	0.100174	0.0584741	0.205042	0.175115	0.414833	0.161321	0	0	0.153626	0	0.0619041	0.115803	0.126952	0.056727	0.0327736
BX072579.2	0	0	0	0	0	0	0	0	0	0	0	0	0	0	0	0	0	0	0	0	0.261708	0	0	0	0	0	0	0	0	0	0	0	0	0	0	0	0	0	0	0	0	0	0	0	0	0	0	0	0
BX248123.1	0	0	0	0.0221863	0	0	0	0.0252613	0	0.0262687	0.0205496	0.0368043	0	0	0.0214288	0.0260502	0	0.0269944	0.0256151	0	0	0.0237753	0.0345328	0	0	0	0	0	0	0	0	0	0	0	0	0	0.0239265	0	0	0	0	0	0.0268902	0	0	0	0	0	0
AL021368.1	0	0	0.0840141	0	0	0	0	0	0.028387	0.0334197	0	0	0.0298394	0	0	0.132567	0	0	0.228117	0	0.0565418	0	0.0878669	0	0	0	0	0	0	0	0	0	0.0677006	0	0	0	0.0304398	0	0.0263935	0	0	0	0	0	0.0827108	0	0	0.050529	0.0875782
AC104129.1	0	0.00411089	0	0.00319942	0.00588308	0.00457041	0	0.00364284	0	0.00757625	0.00592677	0	0	0.0113918	0.00309017	0.00375661	0	0	0.00738773	0	0.0576812	0.0102857	0.00497986	0.00888238	0.0150421	0	0	0	0	0.0160131	0	0	0	0.00738204	0.0101141	0	0	0.00589353	0	0.0325756	0	0	0.0116332	0.0154994	0	0.0233842	0.00320444	0	0
AC103831.1	0	0	0	0	0	0	0	0	0	0	0	0	0	0	0	0	0	0	0	0	0	0.0387053	0	0	0.0339624	0	0	0	0	0	0	0	0	0	0	0	0	0	0	0	0	0.0918154	0	0.104984	0	0	0.0361753	0	0
TMEM72-AS1	0.0123378	0	0.0458259	0	0.0169861	0.013196	0.0093944	0.00525894	0.0092903	0.032812	0.0213903	0.00383099	0.00976561	0.0164456	0.00892216	0.0216927	0.0199538	0	0.0106652	0.0050386	0.00925229	0.0247479	0.0359455	0.00641146	0.0347445	0	0.0102772	0	0.0118361	0.00462342	0.00420147	0	0	0.00532849	0.00486702	0.00426153	0.0348675	0.0170162	0	0.0117568	0	0	0.0223922	0.00447509	0.0045115	0.00562638	0.0323823	0.0165368	0.004777
AC099344.2	0	0	0	0	0	0	0.0990464	0	0	0	0.022552	0	0	0	0	0	0	0	0	0	0	0	0	0	0	0	0	0	0	0.0243727	0	0	0	0	0	0	0	0	0	0.061977	0	0	0	0	0	0	0.0243865	0	0
AP001020.3	0.0712629	0.0114261	0.0617606	0.0800339	0.0081759	0	0.0180872	0.0202503	0.0268302	0.0210579	0.065893	0.0442553	0	0.0422175	0.034356	0.0104414	0	0.0216396	0.0616018	0.0194018	0	0.0190591	0.0692067	0.0123441	0.0501708	0.0122672	0.059361	0.0368988	0.0113942	0.0178031	0.00808919	0.0158084	0	0	0.0187411	0.0164096	0.00959015	0	0.024946	0.0226357	0.037814	0.0565142	0.0215561	0.017232	0.0173722	0	0.0267199	0	0.0183945
AL353597.1	0	0	0	0	0.0140416	0	0	0	0	0.0180828	0	0	0.0322911	0.0181264	0	0	0.131959	0	0	0	0	0.0163664	0.0237716	0	0	0.021068	0	0.0792142	0.0195688	0.0305757	0	0	0	0.0176193	0	0	0.0164705	0.028133	0	0	0	0	0	0	0	0	0	0	0
BLACAT1	0.033997	0.00654118	0.00505095	0	0.00468053	0	0.0207091	0.0115928	0.00511991	0	0	0	0	0.00604215	0	0	0	0.0061941	0.076409	0.0111071	0.00509896	0.0163664	0.00792387	0.00706674	0	0.00702268	0.0453105	0.00528094	0	0.0152879	0.00463088	0	0	0	0	0	0	0	0	0	0	0.00647063	0	0.00986493	0.0497259	0	0	0	0.00526523
AL500522.1	0	0	0	0	0	0	0	0	0	0	0	0	0	0	0	0	0	0	0	0	0	0	0	0	0	0	0	0	0	0	0	0	0	0	0	0	0	0	0	0	0	0	0	0	0	0	0	0	0
AL359091.1	0	0	0	0	0	0	0	0	0	0.0119991	0	0	0	0	0	0	0	0	0	0	0	0	0	0	0	0	0	0.0105127	0	0	0	0	0	0	0	0	0	0	0	0	0	0	0	0	0	0	0	0	0.0104814
AC035139.1	0	0	0	0.0558316	0	0	0	0	0	0	0	0	0.0590229	0	0	0	0	0	0	0.0609061	0	0.0598302	0.173803	0	0	0	0	0.0579163	0	0	0	0	0	0	0	0.0515129	0	0	0	0	0	0.0709636	0	0	0.0545346	0	0	0.0999475	0
EFCAB6-AS1	0.0153294	0.0147472	0.00569372	0	0	0	0	0	0	0	0.00531535	0.00951978	0	0.00681106	0	0	0.012396	0	0.00662559	0.00626031	0.00574785	0	0.0178645	0	0.00539613	0.00791638	0	0.011906	0.0808833	0	0.00522021	0	0.00688222	0.00662049	0.00604712	0	0.00618882	0	0.00536614	0	0.0122013	0.00729407	0	0	0	0	0.0172432	0	0
AC107214.2	0.0321095	0.12356	0.0238526	0.0961642	0.13262	0.171715	0.56233	0.136865	0.0967129	0.170788	0.0445349	0.0997024	0.660796	0.1712	0.139321	0	0	0.029251	0.971475	0.104905	0.264872	0.231866	0.112259	0.033372	0.113029	0.165819	0.213974	0.0498774	0.462058	0.120326	0.656066	0.0854751	0.259483	0.16641	0.101332	0.0221814	0.207413	0.132855	0.179842	0.0611949	0.0511145	0.0611137	0.0874144	0.0931722	0.234826	0.175714	0.120394	0.129112	0.0248645
LINC01964	0	0	0	0	0	0	0	0	0	0	0	0	0	0	0	0	0	0	0	0	0	0	0	0	0	0	0	0	0	0	0	0	0	0	0	0	0	0	0	0	0	0	0	0	0	0	0	0	0
AC053503.2	0.0127393	0.0612776	0.0189268	0.0190764	0.236774	0.0272508	0.106701	0	0.422075	0.180692	0.0530072	0.24525	0.363002	0.203769	0.165825	0.0447972	0.0412062	0.0348157	0.0991103	0.187292	0.420348	0.0817704	0.0296922	0.0264804	0.0538127	0.197364	0.0212234	0.158309	0.171098	0.238693	0.0173528	0.186516	0.0800714	0.0990339	0.64325	0.0264012	0.339448	0.0878497	0.936489	0.267067	0.141956	0.29096	0.0578022	0.166346	0.0558997	0.10457	0.21017	0.170749	0.0887839
LINC00602	0.00985832	0	0.00732326	0	0	0	0	0	0	0	0.0136732	0	0	0	0	0	0	0	0.00852183	0	0	0	0	0	0.0347025	0	0	0	0	0	0.0402853	0	0	0	0.101111	0	0	0.0135965	0.00690192	0	0	0	0	0	0.245128	0	0	0	0
LINC01344	0	0.0681516	0.0334887	0.048219	0.159597	0.0413289	0.456049	0.0109804	0.101838	0.0570915	0.205444	0.127982	0.0611702	0.0400605	0.898849	0.0622782	0.0520781	0.0293343	0.0167013	0.00526016	0.0531253	0.0155017	0.0675472	0.0133868	0.0181362	0.0465616	0.0214583	0.0750292	0.0679614	0.00482673	0.0175449	0.0685748	0.0578272	0.0111256	0.0203241	0.00444892	0.109202	0.071058	0.216425	0.0981907	0.2563	0.0429014	0.356498	0.0280312	0.00470988	0.0528642	0.849987	0.0258959	0.109715
AP001922.3	0	0	0.0179603	0	0.0332862	0	0.0184095	0	0.0182055	0	0	0	0.0574107	0	0.017484	0	0	0	0.0626992	0	0	0.0193986	0	0	0	0	0	0	0	0	0	0	0	0	0	0	0	0	0	0	0	0	0.0219401	0	0	0.0220511	0	0	0
AC009299.3	0.0267158	0.0128506	0.00992292	0.0200027	0.105745	0.028574	0.0508555	0.0113875	0.025146	0.029604	0.0277905	0.0705113	0.0792975	0.0118702	0.053129	0.0176147	0.0756124	0.0182531	0.0461879	0.0381862	0.0751294	0.0964585	0.015567	0.00694154	0.0423192	0.0206948	0	0.0155622	0	0.0250284	0.0181954	0.0622275	0	0.00576903	0.0158082	0.00922771	0.0377502	0.00921154	0.0794922	0	0	0.00635599	0.0424262	0.0387606	0.048845	0.054824	0.0150256	0.017904	0.0310317
LINC02044	0.0162729	0.0234824	0.00604418	0.0121839	0.0224037	0.00870241	0.00619535	0	0	0	0.0169275	0.0151586	0	0.0144606	0.00588392	0.0286115	0	0.00741213	0.0140668	0.00664563	0.0183049	0.0326412	0.0189641	0.00845637	0.0114565	0.0168073	0.0135551	0.0252776	0.0156112	0.00609803	0.011083	0.0216592	0.0511408	0.014056	0.0128387	0	0.00656975	0.0112217	0.00569643	0	0.0129523	0.0154861	0.0221506	0.029512	0.0238017	0.0222627	0.0061015	0	0.00630059
AC097480.1	0	0	0	0	0	0	0.0217707	0	0	0	0	0	0	0	0	0	0	0	0.0247157	0	0	0	0	0	0	0	0	0	0	0	0	0	0	0	0	0	0	0	0	0	0	0	0	0	0	0	0	0	0
RNF139-AS1	0.0263887	0.0423109	0.043562	0.0197578	0.0928447	0.0344963	0.16521	0.0224961	0.108184	0.0311911	0.0325337	0.0364173	0.153172	0.0599272	0.0954156	0.0438197	0.0237101	0.0240395	0.228112	0.014369	0.0923497	0.0941014	0.1811	0.0487578	0.105277	0.0333119	0.0390781	0.040991	0.0562571	0.0747152	0.04593	0.0312206	0.0394912	0.0177284	0.134171	0.0263315	0.0520849	0.0283073	0.108798	0.0279401	0.0420077	0.0306933	0.085144	0.0361591	0.0707622	0.0347648	0.090149	0.0589493	0.0567625
AC073842.1	0	0.687169	0.442179	1.20332	0.450727	0	0.453239	0.152232	0.0448216	1.05536	0.949427	0.813245	1.88459	0.528953	3.48669	0.313974	1.25149	1.13874	2.41838	0.291708	5.80297	1.09846	1.24863	0.24746	1.50864	1.4755	0.198333	1.10955	1.59892	0.758403	0.77027	1.34686	1.65688	0.462737	0.0939249	1.19248	0.432566	0.492575	0.0833478	0.226886	3.12695	1.86933	0.0540163	1.3386	3.35196	1.79156	1.47303	0.558479	0.875782
LINC02516	0.0114949	0	0.017078	0	0	0	0.0175051	0.0195985	0.00865556	0.0101901	0.0318861	0.00713849	0	0	0.0332503	0	0.074362	0	0.158984	0	0.00862015	0	0.0133959	0	0.0161853	0	0.0191502	0	0.0330824	0	0.0156577	0	0.0103214	0	0.0272069	0	0.0371259	0	0.0080477	0.0438143	0.0548954	0.0218781	0.0417246	0	0.016813	0	0.0172399	0	0
AC018766.1	0.0841216	0.0809269	0.0312449	0.125967	0.115814	0	0.0320264	0	0.0950145	0.111859	0	0	0.166459	0.0373764	0.121666	0.0739525	0	0	0.218152	0.0343541	0.0630838	0.0674944	0.245083	0	0.0888354	0	0	0.0326677	0	0.0630466	0.0286464	0.0559827	0.0377669	0	0.132737	0	0.0339618	0	0.0883418	0	0	0.040027	0	0.0915359	0.215322	0.0383617	0.0630825	0.112751	0.0325704
LINC00273	0	0	0	0	0	0	0.0106755	0	0	0	0	0	0	0	0	0	0	0	0.0242391	0	0	0	0	0	0	0	0	0	0	0	0	0	0	0	0	0	0	0	0	0	0	0	0	0	0	0	0	0	0
DEPDC1-AS1	0	0	0	0	0.0899022	0	0.0248609	0	0.0860489	0	0	0	0.142138	0	0.0118056	0	0	0	0.423358	0	0.122424	0	0.0570747	0	0	0	0.0543944	0.0126793	0.0313226	0	0	0	0	0	0.0257597	0	0	0	0.0342882	0	0	0	0	0	0.023878	0	0.0734529	0	0.0252832
AC068768.1	0.579653	0.156139	0.258358	0.260399	0.21547	0.136394	0.414884	0.207542	0.314262	0.154157	0.313545	0.26638	0.504686	0.185435	0.377261	0.142683	0.224992	0.21122	0.310663	0.179909	0.278201	0.325557	0.499881	0.0722933	0.253016	0.155659	0.424902	0.19809	0.355893	0.304103	0.157914	0.185164	0.145734	0.310424	0.265247	0.192205	0.458678	0.207858	0.219144	0.176754	0.203003	0.253747	0.589135	0.269117	0.390003	0.348926	0.295582	0.295232	0.1975
AC093117.1	0	0	0.0278628	0	0	0	0	0	0	0	0	0	0	0	0	0	0	0	0.00810575	0	0	0	0	0	0	0	0.0156218	0	0	0	0	0	0	0	0.0147961	0	0	0	0	0	0	0	0	0	0	0	0	0	0
AC090912.1	0.500007	0.927678	0.291838	1.44398	1.91764	1.48976	0.815829	1.3092	1.88251	1.64636	1.06501	1.97397	0.706722	0.825166	0.67151	2.04083	0.808654	1.26888	1.63627	1.16683	1.68733	1.43278	0.790802	0.74238	1.03091	1.1804	0.416499	1.63659	3.73462	1.8737	0.462162	1.61623	3.01446	1.41906	0.704437	1.87507	0.749781	1.18218	0.450078	1.08906	1.13707	2.82099	0.194459	1.32133	1.33208	1.33553	1.90155	1.34035	1.88063
LINC02440	0	0	0	0	0	0	0	0	0	0	0	0	0	0	0	0	0	0	0	0	0	0	0	0	0.0210766	0	0	0	0	0	0	0	0	0	0	0	0	0	0	0	0	0	0	0	0	0	0	0	0
AC008761.2	0.0485857	0	0	0	0	0	0	0	0.0365847	0	0	0	0	0	0	0.0854248	0	0	0	0	0	0	0	0	0.0342055	0	0	0	0	0	0	0	0	0	0.0383321	0.0671266	0	0	0	0	0	0	0	0	0	0	0	0	0
AIRN	0.00930838	0	0.00345737	0.00348469	0	0	0.00354384	0.00396765	0	0	0	0.00289032	0.00368387	0	0	0	0	0	0.0120697	0	0.00349023	0.00746852	0	0	0	0	0	0	0	0	0	0	0	0.00402012	0	0	0	0.00641902	0	0	0	0	0	0	0.00680747	0	0	0	0
AC073172.2	0	0	0	0	0	0	0.0271467	0	0	0	0	0	0	0	0	0	0	0	0	0	0	0	0	0	0	0	0	0	0	0.0267203	0	0	0	0	0	0	0	0	0	0	0	0	0	0	0	0	0	0	0
AC012508.1	0	0	0	0	0.00313081	0	0	0	0	0	0.00315406	0	0.00359992	0.0040416	0	0.00399832	0	0	0	0.00371478	0	0	0	0	0.00320199	0	0	0	0.0174528	0	0	0	0.00408382	0	0	0	0	0	0	0	0	0	0	0.00329933	0	0	0	0	0
AC012313.8	0.030148	0.0181269	0.0447909	0.0112862	0.0129707	0.0161225	0.0602584	0.0128504	0.0993179	0.0100222	0.0104536	0.00468059	0.0298283	0.0200928	0.0190764	0.00993882	0.0121895	0.0137321	0.0553793	0.00615601	0.0197823	0.0151181	0.0614841	0	0.0795934	0.00389224	0.0313911	0.00878072	0.0361526	0.0112975	0.0384993	0.0100317	0.0236864	0.00325509	0.00594637	0.0026033	0.136929	0.0311849	0.166217	0.00718208	0.041993	0.0107588	0.0376174	0.00820129	0.101972	0.0206224	0.0621716	0.0151531	0.0175092
AP001783.1	0	4.55355	20.8168	5.64519	89.0982	2.95688	7.6228	3.6423	0	9.9145	3.74726	10.119	19.9592	1.37724	13.8431	0.99425	3.92918	1.33556	6.26416	8.21105	59.8715	1.64681	0.439334	1.34957	0	8.04695	0.209351	11.2565	0.482213	10.768	0.313814	17.1717	1.05312	3.50957	3.60219	0	22.052	11.2076	26.7161	15.5669	14.3362	21.5256	38.8097	2.52207	0	1.22252	0.408349	1.6843	1.29746
AP001893.1	0.168708	0	0	0.042105	0.0774227	0	0.0428198	0	0.0846906	0.0498526	0	0.0698468	0.222559	0.0999458	0.0406673	0.0494378	0	0	0.24306	0	0	0.225603	0.0655361	0	0	0	0	0.0873544	0.0539493	0.126442	0.0766015	0	0	0	0.0887357	0.0776963	0.136222	0.0775601	0.078743	0	0.179042	0.0535167	0.102064	0.122385	0.0411269	0.0512902	0.253027	0	0
AC069360.1	0	0	0	0	0	0	0	0	0	0	0	0	0	0.0382052	0	0.0188981	0	0	0.0557473	0	0.0161207	0.137982	0	0.0446839	0.0302685	0	0.107439	0	0.0206226	0.0161112	0	0	0	0.0185681	0	0	0	0	0.0150501	0	0	0	0	0	0.125769	0	0	0	0.0665854
AL049830.3	0	0	0	0	0	0.00945848	0.0471352	0	0.026636	0.00783954	0	0	0	0	0.2622	0	0.057209	0	0.0229334	0.00722301	0.0132635	0.0212862	0.175199	0	0.0311297	0.0182675	0.117862	0	0.00848377	0	0.0421608	0	0	0	0.0209311	0	0.0499838	0	0.0123827	0	0	0.0168315	0.00802502	0	0	0	0	0	0
FAM198B-AS1	0.032491	0.0416761	0.0589991	0.0297326	0.0695829	0.0617795	0.0274885	0.0246207	0.0652414	0.0416042	0.0550783	0.0650161	0.0400045	0.0513288	0.0417707	0.0253896	0.0350315	0.0197324	0.00936207	0.0501269	0.0162436	0.121655	0.02945	0.00375205	0.0457489	0.0410152	0.108258	0.0588817	0.00692663	0.0405851	0.0688449	0.0624655	0.0194494	0.0592474	0.0427234	0.0623472	0.0553844	0.0647274	0.154176	0.0412813	0.0402281	0.0412266	0.0327604	0.039283	0.163691	0.0724376	0.0460226	0.0483874	0.0559109
AC073389.2	0.0252887	0	0	0	0	0	0	0	0	0	0.0175374	0	0.0200165	0.0449446	0	0	0	0	0.0437207	0	0	0	0	0	0	0	0	0	0	0	0	0	0	0	0	0	0	0	0	0	0	0	0	0	0	0	0	0	0
AL031656.1	0	0.00918158	0.00708979	0	0	0.0204158	0.0218013	0	0	0	0	0	0	0	0	0	0	0	0	0	0.00715719	0	0	0	0	0	0	0	0	0	0	0	0	0	0	0	0	0	0	0	0	0	0	0	0	0	0	0	0
AL136164.2	0.0278107	0	0.0206592	0	0.0191441	0	0.0211759	0	0	0	0	0	0	0	0	0	0	0	0	0	0	0	0	0	0	0	0	0	0	0.0208433	0	0	0	0	0	0	0.0224556	0	0	0	0	0	0	0	0	0	0	0	0
AL022328.4	0.284719	0.332601	0.58919	0.319763	0.167994	0.348027	0.449073	0.381417	0.168451	0.540858	0.479518	0.492556	2.30189	0.433731	0.75005	0.303936	0.427582	1.00044	0.80868	0.514934	1.20483	0.293712	0.450307	0.338187	0.272038	0.567132	0.406572	0.773972	1.89248	0.487745	0.512487	0.703782	0.712175	0.351329	0.914571	0.224784	0.936002	0.785364	0.284765	0.542624	1.03597	0.503196	0.75666	0.988454	0.282588	0.519359	0.549026	0.408876	0.236225
AL683887.1	0	0	0	0.212432	0	0	0.108019	0	0	0	0	0	0	0	0.820714	0	0	0	0.0613156	0	0	0	0.247987	0	0.0998754	0.073261	0	0.110182	0	0	0	0	0	0	0.0559622	0	0	0	0	0	0	0	0.0643679	0.0514557	0	0	0	0	0
AC073172.1	0	0	0.0325216	0	0.0602731	0.0936491	0	0	0	0	0	0	0	0	0	0	0	0.039882	0	0	0	0	0	0	0	0	0	0	0	0	0	0.0582701	0.03931	0.113445	0	0	0	0	0	0.166871	0	0	0	0	0.128068	0.0399292	0.03283	0	0
LINC01972	0	0	0	0	0	0	0	0	0	0	0	0	0	0	0	0.0323626	0.0595367	0	0	0	0	0	0	0	0	0	0	0	0	0.02759	0.0250721	0	0	0	0	0	0	0	0	0	0	0.0350327	0.0334061	0	0	0	0	0	0
LINC02385	0	0	0	0	0.0327418	0	0	0	0	0	0	0.029538	0	0	0.137585	0	0	0	0	0	0.0356689	0	0	0	0.0669725	0	0	0	0	0.0356479	0	0	0	0	0	0	0	0	0	0	0	0	0	0	0	0	0	0	0
AL049597.2	0.169469	0.0815164	0.110154	0.0793029	0.116658	0.0906282	0.290337	0.0541764	1.22823	0.169011	0.117524	0.144709	0.251508	0.112946	0.260423	0.0372456	0.342599	0.135084	0.146494	0.224928	0.0794292	0.169965	0.296242	0.0440329	0.149138	0.0656376	0.211748	0.148075	0.162578	0.158765	0.0577102	0.0563905	0	0.146381	0.150417	0.11707	0.0342092	0.0876486	0.148309	0.0403721	0.0337217	0.0806371	0.0768932	0.122937	0.201398	0.0772823	0.365366	0.085179	0.21325
AL139099.2	0.101533	0.0976773	0.037712	0	0.104839	0	0.347897	0	0.229362	0.0450041	0.140824	0.0630537	0.120548	0.225563	0.146849	0	0	0	0.0877685	0.0414648	0	0.0814646	0.414136	0.0527627	0.107223	0	0.169152	0.0394293	0.0487023	0.0760962	0.24203	0	0	0.0877008	0	0.0350699	0.245948	0.0700169	0	0.193504	0.161629	0.0966237	0.230344	0	0	0	0	0	0.0786239
AC008147.1	0	0	0	0	0	0	0	0	0	0	0	0	0	0	0.0452971	0	0	0.057062	0	0	0	0	0	0	0	0	0	0.0486497	0	0	0	0	0	0	0	0	0	0	0	0	0	0	0	0	0	0	0	0	0
AC105343.1	0	0	0	0	0	0	0.0432982	0	0	0	0.0394346	0	0	0	0	0	0	0	0	0	0	0	0	0	0	0	0	0	0	0	0.116186	0	0	0	0	0	0	0	0	0	0	0	0	0	0	0	0	0	0
EFCAB14-AS1	0	0	0	0.0260993	0	0	0.0265424	0.0297166	0.104993	0	0	0.0649432	0.0551824	0.0309763	0.126041	0.0306447	0	0	0.180797	0	0	0.0559371	0.203117	0	0.0245413	0.0360032	0.0580735	0.0270739	0.0334412	0	0.0237412	0	0	0.0301096	0	0.0240805	0.0281464	0	0.0244049	0	0.110981	0	0	0.0252873	0.0764792	0	0.130702	0	0
AL080317.1	1.93706	0.703207	0.407249	0.410467	1.20763	0.547267	1.86454	0.716613	1.81636	1.23119	0.633643	0.907883	2.14072	1.20168	1.6651	1.86355	0.827528	0.699188	4.10715	1.13436	2.76821	1.23162	4.47222	1.21553	0.977775	0.868215	0.547997	0.823201	3.43609	0.739581	1.44374	0.340519	2.16593	0.473537	1.32642	0.605948	2.77401	0.7057	0.844402	2.08964	1.45451	0.730402	0.563826	0.715854	0.588034	0.466677	1.0963	0.489868	1.69811
AL096869.1	0	0	0	0	0.0501377	0	0	0	0	0	0	0	0	0.0323617	0	0	0	0	0	0	0	0	0	0	0	0	0.0606707	0	0.0698735	0	0.024803	0	0	0	0	0	0	0	0	0	0.115945	0.0346566	0	0.0264182	0	0	0	0	0
AC022535.1	0	0	0	0	0	0	0	0	0	0	0	0	0.0233187	0	0	0.0258994	0	0	0	0	0	0	0	0	0	0	0	0	0	0	0	0	0	0	0	0	0	0	0	0	0	0	0	0	0	0	0	0	0
AL035461.2	0.971251	0.186873	0.952373	0.0290878	0.88253	0.207762	1.18326	0.165596	0.848361	0.309961	0.242477	0.265391	1.81428	0.621419	0.477608	0.443997	0.816812	0.318523	4.33223	0.285585	5.21501	0.467566	1.35825	0.282643	0.79319	0.321006	2.45948	0.603479	3.98792	0.29117	0.873169	0.103418	0.662794	0.234901	1.13409	0.187865	0.470539	0.107163	1.38717	0.444247	0.247378	0.184857	0.246785	0.225463	0.53983	0.4252	0.291335	0.520719	1.02286
AC027307.3	0.185067	0.0712157	0.0962343	0.0969947	0.0764373	0.0593821	0.140916	0.0157768	0.0418064	0.0656241	0.0385025	0.0689578	0.161133	0.0493369	0.120449	0.0976172	0.0598614	0.118015	0.0639912	0.0906948	0.0416353	0.103941	0.32351	0.153875	0.0390876	0.133801	0.0924952	0.0862426	0	0.055481	0.100835	0.0738971	0.0166174	0.0479564	0.146011	0.0255692	0.074716	0.0255243	0.103654	0	0.0294605	0.0176119	0.151148	0.0671263	0.054138	0.135033	0.0555126	0	0.042993
TRERNA1	0.0440637	0	0.0327328	0	0	0	0	0	0	0	0	0	0	0	0	0	0	0	0	0	0	0	0	0	0	0	0	0	0	0	0	0	0	0	0	0	0	0	0.0308495	0	0	0	0	0	0	0	0	0	0
AC087636.1	0	0	0	0	0	0	0	0	0	0.031495	0	0	0.0281209	0	0	0	0.0574586	0	0	0	0	0	0	0	0	0.0366944	0	0	0	0	0	0	0	0	0	0	0	0	0	0	0	0	0	0	0	0	0	0	0
AC007922.2	0	0	0	0.0542421	0	0	0	0.0617598	0	0.0642229	0.0502405	0	0.172028	0	0.10478	0	0	0	0	0	0	0	0.0844273	0	0	0	0	0	0	0	0	0	0	0	0	0	0	0	0	0	0	0	0	0	0.052982	0	0.0543273	0	0
AC068792.1	0.732281	0.516612	0.580241	0.365516	0.067211	0	0.223033	0.16647	0.220561	0.346218	0.13542	0.272855	0.270486	0.130145	0.247125	0.429172	0.39477	0.222364	0.379804	0.199369	0.0366098	0.235016	0.284461	0.152215	0.103109	0.302531	0.325323	0.341248	0.140501	0.0365882	0.299242	0.0649775	0.26301	0.168672	0.154064	0.23607	0.275929	0.134661	0.23925	0.18608	0.0777136	0.139375	0.0886023	0.141658	0.357025	0.222627	0.146436	0.1963	0.264625
Z99758.1	0	0	0	0	0	0	0	0	0	0	0	0	0	0.0491581	0.0400043	0	0	0	0.0478195	0.0451831	0	0	0	0	0.155784	0	0	0	0	0	0	0	0	0	0	0	0	0	0	0	0	0	0	0	0	0	0	0	0
AC010768.2	0	0	0	0	0.0247152	0.0384011	0.0273382	0	0	0.0318283	0	0	0	0	0.025964	0.0946904	0	0	0.124145	0	0.0269247	0	0	0	0	0	0	0	0	0	0	0	0	0.0310124	0	0	0.0289903	0	0	0	0	0	0	0	0	0.0327462	0	0.0481229	0
LINC02303	0	0	0	0	0	0	0	0	0	0	0	0	0	0	0	0	0	0	0	0	0	0	0	0	0	0	0	0	0	0	0	0	0	0	0	0	0	0	0	0	0	0	0	0	0	0.01623	0	0	0
AL109810.2	0	0.0145284	0	0	0	0	0	0	0	0	0	0	0	0	0	0	0	0	0	0	0	0	0	0	0	0	0	0	0	0	0	0	0	0	0	0	0	0	0	0	0	0	0	0	0	0	0	0	0
AC136475.8	0	0	0	0	0	0	0.200787	0	0	0	0	0	0	0	0	0	0	0	0.0455896	0	0.03955	0.0423151	0.0614613	0	0	0	0	0	0	0.0395266	0	0.0701959	0	0.0455544	0	0	0	0	0.0369235	0	0	0.0501893	0	0	0	0	0	0	0
LINC02419	0	0	0	0	0	0	0	0	0	0	0.00824143	0	0	0	0.00859403	0	0	0	0	0	0.0712961	0.00953511	0	0.0494053	0	0	0	0	0	0	0	0	0	0	0	0.00820959	0	0.0163904	0	0	0	0	0	0.00862101	0	0	0.249531	0	0
BHLHE40-AS1	0.164837	0.0432484	0.105752	0.044879	0.159889	0.0961653	0.211089	0.0958106	0.891418	0.0863475	0.140292	0.120979	0.628636	0.119847	0.0596015	0.0526949	0.121177	0.0409536	0.200782	0.0673173	0.129232	0.288559	0.235756	0.0545104	0.0791247	0.0696478	0.287097	0.0814708	0.0431277	0.0730014	0.132678	0.0897536	0.0807324	0.0517748	0.0354681	0.0724632	0.0604988	0.041335	0.110159	0.0571183	0.0834914	0.213909	0.149584	0.0924006	0.531517	0.0478357	0.494444	0.100426	0.232081
AP000919.4	0.0848226	0.217603	0.231039	0.550406	0.0389264	0.0302409	0.150702	0.0723104	0.234193	0.350907	0.137254	0.14047	0.0223795	0.175877	0.490719	0	0.137182	0.154543	0.244411	0.230936	0.0212032	0.317599	0.0988503	0	0.199057	0.204418	0.141312	0.307439	0.162747	0.296669	0.0192568	0.0752656	0.0507755	0.0488445	0.223072	0.136724	0.0456598	0.155982	0.376107	0.269428	0.180037	0.430512	0.0769733	0.451238	0	0.309451	0.106014	0.303174	0.0656837
AC018450.2	0	0	0	0	0	0	0	0	0	0	0	0	0	0	0	0	0	0	0	0	0	0	0	0	0	0	0	0	0	0	0	0	0	0	0	0	0	0	0	0	0	0	0	0	0	0	0	0	0
LINC02267	0	0	0	0	0	0	0.0127947	0	0	0	0	0.00521761	0.0665013	0	0.0850606	0	0.0951162	0	0.167043	0	0.00630057	0	0.0685384	0	0	0	0	0	0	0	0.0114444	0	0	0.00725713	0.0198859	0	0.0271358	0	0.429398	0.0160122	0	0	0	0	0	0	0	0	0.0260241
AL022069.1	0.0248868	0	0.0554616	0.0186333	0.0856571	0.0266179	0.047374	0.0318236	0.0187396	0.0772166	0.0604053	0.0386377	0.0393967	0.0663454	0.116981	0.0109392	0.0201246	0	0.0322694	0.0203269	0.0186629	0.0599033	0.058005	0.0258653	0.113886	0.0514081	0	0.00966451	0	0.121238	0.0847486	0.0828106	0	0.0537409	0.127625	0.0343839	0.0301421	0.0171618	0.00871178	0.0474298	0.0396168	0.0355252	0.0112919	0.0361071	0.0273006	0.12484	0.0186625	0.0333566	0
AL360091.3	0	0.0506054	0.0781526	0	0	0	0.0801073	0.0448437	0.0396098	0	0	0	0	0	0	0	0	0	0.0909436	0	0	0.0422058	0.122605	0	0.0370339	0	0	0	0	0	0	0	0	0	0	0	0.0424742	0	0	0	0	0	0.0477354	0	0	0	0.157788	0	0
AC138907.1	0	0	0	0	0	0	0	0	0	0	0	0	0.0066999	0	0	0	0	0	0	0	0	0	0	0	0	0	0	0	0	0	0	0	0	0	0	0	0	0	0	0	0	0	0	0	0	0	0	0	0
AC090241.3	0.00783279	0	0.0407302	0	0.00539188	0	0.047713	0	0.0117961	0	0	0	0.0123996	0.0139209	0.0226573	0	0	0	0	0	0	0.0125692	0.0365126	0.0162815	0.0165434	0	0.0130492	0	0.00751429	0.0117409	0.0160041	0	0	0	0	0.0162328	0.00632455	0.0108029	0.0274192	0.0149279	0.0124689	0	0.00710796	0	0	0	0.0117476	0.0419941	0.0121309
AL354989.1	0.0641179	0	0.023815	0.0480064	0.0662055	0	0.0732319	0.10932	0.144841	0.0284199	0.0666972	0	0.203002	0.0854654	0.208652	0	0.0518485	0.0292049	0.0277127	0	0.0240414	0.0257223	0.112082	0.0666388	0.112851	0	0.320456	0	0.0307553	0.0480544	0	0.0853405	0	0	0	0.0221465	0.0776575	0.0442154	0.112224	0	0	0	0.0581845	0.0697691	0.0468912	0	0.0721227	0.0859391	0.0496507
AC015849.2	0	0	0	0	0	0	0	0	0	0	0	0	0	0	0	0	0	0	0	0	0	0	0	0	0	0	0	0	0.0477497	0	0.0338994	0	0	0	0	0	0	0	0	0	0	0	0	0	0	0	0.0373251	0	0
AC096558.1	0.0438265	0.0421621	0	0.0328138	0	0.046875	0.0500563	0	0	0	0.0151965	0.0136085	0	0.0389455	0	0	0.0708801	0	0.340965	0	0	0.193402	0.102149	0.0455497	0	0	0	0.0170195	0	0.0164233	0	0.0291664	0	0.0189279	0	0	0	0	0.0153417	0	0	0	0	0.0317929	0.0320516	0	0.0164327	0.029371	0
AL121890.2	0	0	0.0975647	0	0.120546	0	0.100005	0	0	0	0	0	0	0.0389036	0	0.0769742	0	0	0.113533	0	0.0328307	0.140504	0.102039	0	0	0	0	0	0	0	0	0	0	0	0.10362	0	0	0	0	0	0	0	0	0.0635174	0.0320171	0.0399292	0.03283	0	0
DHCR24-DT	0.505609	0.61441	0.059304	0.278939	0.0915915	0.398468	0.344461	1.83753	0.761441	0.920024	0.313724	0.181784	0.168505	0.212826	0.404121	0.888976	1.20505	1.13937	1.10416	0.260822	0.119736	0.320268	0.310118	0.497831	0.093674	0.467242	0.265999	0.186013	0.0255289	0.0797766	0.09062	0.318772	0.215049	0.275828	0.12597	0.864003	0.0429739	0.22021	0.0745228	0.152147	0.169446	0.202594	0.0965939	0.0579129	0.0583841	0.121353	0.139689	0.214005	0.288493
LINC01872	0	0	0	0	0	0	0.0698862	0	0	0	0	0.0113997	0	0	0	0	0	0	0	0.0149931	0	0	0	0	0	0	0	0	0	0.0137577	0	0	0	0	0	0	0	0	0	0	0	0	0	0	0	0	0	0	0
AL669831.5	0.0147598	0.0248487	0.0630448	0.00828821	0.043181	0.0157864	0.132053	0	0.0138925	0.0196266	0.0230303	0.0229151	0.0554925	0.0163949	0.093394	0.0227072	0.0358062	0.0470604	0.121209	0.00904153	0.0664112	0.0710545	0.098904	0.0230101	0.0207825	0.00381111	0.0491788	0	0.0141596	0.0304205	0.0175918	0	0.00993973	0.00637449	0.040757	0.00764711	0.0774652	0.0203566	0.0568342	0.0281295	0.0528656	0	0.0133939	0.00535356	0.024287	0.0201926	0.0304378	0.00989149	0.0142868
AL354979.1	0	0.0736252	0	0	0	0	0	0	0	0	0	0	0.0605762	0	0	0	0	0	0	0	0	0	0	0	0	0	0	0	0	0	0	0	0	0.0661053	0	0	0	0	0	0	0	0	0	0	0	0	0	0	0
AC018552.2	0	0.0730758	0	0	0.0871486	0	0	0	0	0.0448921	0	0	0	0	0.0366208	0.0445186	0	0.0461322	0	0	0.0379758	0.0203155	0	0	0.0713041	0	0.0843655	0	0	0	0.0517346	0	0	0.065612	0.0399531	0	0.0204447	0	0	0	0	0.0240958	0	0	0	0	0	0	0
NTRK3-AS1	0	0	0	0	0	0	0	0	0	0.0203304	0	0	0	0	0	0	0	0	0	0	0	0	0	0	0	0	0	0.00593734	0.0440022	0	0	0	0	0	0	0	0.00617255	0	0	0	0	0	0	0	0	0	0	0	0
AL121809.1	0	0	0	0	0	0	0	0	0	0.0212563	0	0	0	0	0	0.042159	0	0	0	0	0	0	0	0	0	0	0	0	0	0	0	0	0	0	0	0	0	0	0	0	0	0	0	0	0.0175359	0	0	0	0
LINC01515	0.356686	0.0818856	0.0918342	0.0379343	0.171594	0.0671952	0.192891	0.0587409	0.100718	0.0251521	0.0716771	0.0906165	0.29676	0.0882448	0.297509	0.0605755	0.0196658	0.0166159	0.0858418	0.0513139	0.0471135	0.0504075	0.0377885	0.0189567	0.129838	0.0460497	0.124923	0.0362027	0.081657	0.0698691	0.0883376	0.0620407	0.0236565	0.0945283	0.1487	0.0308001	0.248731	0.0782628	0.23695	0.181532	0.109689	0.0925741	0.0827587	0.08968	0.120052	0.0776323	0.183891	0.086923	0.0517884
AL354896.1	0	0	0	0	0	0	0	0	0	0	0	0	0	0	0.0262416	0	0	0	0	0	0	0	0	0	0	0	0	0	0	0	0	0	0	0	0	0	0	0	0	0	0	0.0345331	0	0	0	0	0	0	0
AC107871.2	0	0.106436	0	0	0.0190401	0.0295835	0.105304	0.0235795	0	0	0	0	0.087572	0.0245791	0.0800085	0.0729477	0	0	0	0	0	0	0	0	0.019473	0	0	0	0	0	0	0	0.0248358	0	0.0436444	0	0.0893343	0	0.0580943	0	0	0	0.0502	0.0200649	0.0404564	0	0.0414836	0.0370729	0.0214186
AL355390.1	0	0	0	0	0	0	0	0	0	0	0	0	0	0	0	0	0	0	0	0	0	0	0	0	0	0	0	0	0	0	0	0	0	0	0	0	0	0	0	0	0	0	0	0	0	0	0	0	0
AL137789.1	0	0	0	0	0	0	0	0	0	0	0	0	0	0	0	0	0	0	0	0	0	0.0108457	0	0	0	0	0	0.0104988	0	0	0	0	0	0.011676	0	0.018676	0	0	0	0	0	0	0	0	0	0	0	0	0
AC020611.2	0.0303389	0	0	0	0	0	0	0.0258636	0	0	0	0	0	0	0	0	0	0	0.0262259	0	0	0	0	0	0	0	0	0	0.0291053	0	0	0	0	0	0	0	0	0	0.0212406	0	0	0	0	0	0	0	0	0	0
AL117335.1	1.55816	0.0609344	0.376416	0.0663934	0.061042	0.0541964	0.25079	0.0431972	0.42925	0.1123	0.0527103	0.023601	0.0902423	0.0675427	0.0458045	0.133639	0.122926	0.0692413	0.251863	0.0517342	0.104499	0.0508203	0.0885777	0.013166	0.12486	0.0392518	0.0633135	0.0787114	0.182293	0.00949426	0.043139	0.134888	0.0682483	0.0875371	0.0099945	0.0525067	0.0204574	0.0524146	0.026607	0.0482857	0.120995	0.0723325	0.471324	0.0183793	0.120438	0.0231077	0.0189993	0.0509378	0.323718
LINC01093	0	20.6189	0.0760882	27.2439	0.229152	31.1949	1.01389	25.737	0.173536	24.5616	21.1852	51.5073	118.367	20.1609	1.83325	16.951	23.1088	53.4427	12.927	40.6377	15.4583	12.8409	2.53653	31.6436	0.0180278	46.0718	0.170641	5.27038	0.122828	19.4027	0.174401	45.7388	1.21861	28.798	0.646487	22.5185	0.165409	22.8499	16.8878	74.0814	1.63052	26.0744	1.64984	32.1919	0	44.9113	0.15362	31.5416	0.118974
ST20-AS1	1.22925	0.672442	0.598026	0.638844	0.454617	0.855882	1.29571	0.641085	0.254092	0.354693	0.340988	0.380196	1.87346	0.526899	1.72908	0.31784	0.537945	0.487452	0.6709	0.570914	0.889298	0.5763	1.57861	0.541095	0.478529	0.751814	0.72279	0.898573	0.855549	0.578064	1.19508	0.705782	0.376578	0.649564	0.661767	0.399613	0.533256	1.03052	1.49173	0.918721	0.652276	0.500039	2.41036	0.769338	1.11757	0.663895	0.589238	0.69781	0.608464
AL096678.1	0	0	0	0	0.118758	0	0.0985218	0	0.0649534	0	0.0299101	0.0267845	0.0341383	0	0.0311898	0.0379163	0.0697538	0	0	0	0	0.0346052	0.100526	0	0	0	0.143707	0.0669964	0.0413764	0.0323248	0.0881241	0.057406	0	0	0.102084	0.0297946	0	0	0.0603918	0	0	0	0	0.0625754	0.0630845	0	0.0323431	0.0578086	0
LINC01559	23.6688	0.0148629	0.0153023	0.00385581	0.0141801	0	0.235276	0.0175608	0.00387782	0	0.00714271	0.00639629	0	0.00915264	0.0223449	0.00452732	0.00832881	0	0.547559	0.10095	0	0.00413196	0.0660169	0.0374664	0	0.0957415	0.265966	0	0	0	0.00350743	0	0	0.00444827	0	0	0	0.00710265	0	0	0	0	0	0	0.143117	0	0	0.00690252	0.0478545
AC010267.1	0	0	0	0	0	0	0	0	0	0	0	0.0228612	0	0	0	0	0	0	0	0	0	0	0	0	0	0	0	0	0	0	0	0	0	0	0	0	0	0	0	0	0	0	0	0	0	0	0	0	0
AC022915.3	0	0	0.0254588	0.02566	0	0	0.0260956	0	0	0	0	0	0	0	0	0	0	0	0	0.0279922	0	0.0274977	0	0	0	0	0	0	0.0328782	0	0	0	0	0	0	0	0.0276726	0	0	0	0	0	0	0	0	0	0	0	0
AL513327.1	0.182532	0.302423	0.327686	0.360646	0.115179	0.0433842	0.428539	0.211798	0.118356	0.364079	0.186359	0.138545	0.136451	0.144181	0.249332	0.173839	0.082002	0.392612	0.372551	0.144946	0.0912555	0.333589	0.4668	0.163361	0.153495	0.104737	0.211176	0.0669463	0.0145925	0.129202	0.252088	0.114726	0.0136582	0.083212	0.14401	0.252189	0.0655044	0.0839156	0.0603467	0.164274	0.0968565	0.101329	0.0828206	0.0735631	0.218777	0.217348	0.152089	0.142715	0.0981574
AC079061.1	0.0993045	1.0445	0.049179	0.713773	0.118488	0.169939	0.115941	2.51146	0.104686	0.387342	0.367286	1.11416	0.319645	0.900097	0.129263	0.07566	0.107069	0.657372	0.160238	1.75736	0.0347525	0.382446	0.0462909	0.0963283	0.0233043	0.772659	0.0110292	0.159397	0.0190533	0.401899	0.135267	0.581565	0.0178333	0.823447	0.172364	0.1372	0.283313	0.630015	0.834291	1.02199	0.126465	0.378011	0.54069	1.23425	0.106515	0.537388	0.248227	1.95215	0.0563918
AP002892.2	0	0	0	0	0	0	0	0	0	0	0	0.0225755	0	0	0	0	0	0	0	0	0	0	0	0	0	0	0	0	0	0	0	0	0	0	0	0	0	0	0	0	0	0	0	0	0	0	0.0272606	0	0
AC010729.1	0	0	0	0	0	0	0	0	0	0	0	0	0	0	0	0	0	0	0	0	0	0	0	0	0	0	0	0	0	0	0	0	0	0	0	0	0	0	0	0	0	0	0	0	0	0	0	0	0
AC007598.1	0	0	0	0.0340224	0	0	0	0	0	0.0402826	0	0	0	0	0	0.0399475	0	0	0	0	0	0	0	0	0	0	0	0	0	0	0	0	0	0	0	0	0	0	0	0	0	0	0	0	0	0	0	0	0
AC140481.1	0	0	0	0	0	0	0	0	0	0	0	0	0	0.0167812	0.0136564	0	0	0	0	0	0	0	0	0	0	0	0	0	0	0	0	0	0	0	0	0	0	0	0	0	0	0	0	0	0	0	0	0	0
AC009102.2	0	0	0.00922668	0.0185992	0.0171001	0	0	0	0	0	0	0	0.0196623	0.033112	0	0	0	0	0	0	0.00931439	0.00996562	0.0144747	0	0	0	0.0206924	0	0	0.0186178	0.00845934	0	0	0.021457	0.00979936	0.0171605	0.010029	0	0.00869584	0	0	0.01182	0.0225425	0.036041	0	0.0339849	0.0651993	0	0.0192362
AL031847.1	1.13097	0.259052	0.960161	0.362905	0.556091	0.230407	0.61511	0.32138	0.0811058	0.859363	0.709613	0.602013	0.72467	0.478576	0.389459	0.378762	0.9581	0.490612	0.977643	0.615829	0.80774	0.518528	0.251048	0.503758	0.417072	0.500617	0	0.209142	1.54997	0.766901	0.77027	0.645134	0.483576	0.186074	0.339919	0.148815	0.173942	0.742772	0.037705	0.923752	0.0857317	0.153754	0.537591	0.351614	0.90588	0.392954	0.484634	0.216553	0.542151
LINC01804	0	0	0	0	0.00630387	0	0	0	0	0	0	0	0.253695	0	0.231784	0	0	0	0	0	0	0	0.106721	0	0	0	0	0	0	0	0	0	0	0	0	0	0	0	0.0256455	0	0	0	0	0	0	0	0	0	0.0141827
SOX21-AS1	1.90135	0	0.0644099	0	0.00852662	0	0.00943155	0.0158392	0.00466352	0	0	0	0	0.00550356	0	0	0	0.0112839	0	0	0	0	0.0216526	0	0	0	0.0103179	0	0.00594148	0	0.00843618	0	0	0	0	0	0	0	0	0	0	0	0	0.00449279	0.00452934	0.00564864	0.00464435	0	0.00959178
AL357832.1	0	0	0	0	0	0	0	0	0	0	0	0	0	0	0	0	0	0	0	0	0	0	0	0	0	0	0	0	0	0	0	0	0	0	0	0	0	0	0	0	0	0	0	0	0	0	0	0	0
AC092368.3	1.9193	0.898588	2.77547	2.30882	1.5414	1.1222	2.34801	1.21078	1.79208	0.816692	0.408176	0.333737	2.20785	1.51225	6.82873	1.73228	0	0.0116563	3.81594	1.55718	1.8711	2.02246	2.05778	1.6756	1.56743	1.40085	1.49217	0.665837	1.63258	1.07405	2.66666	1.12402	0.51701	0.641026	1.4234	0.839716	1.65305	1.58825	0.59124	0.365785	2.3424	1.12025	1.28885	1.3459	2.02124	1.91389	2.70585	2.69255	4.15157
AL645937.2	0	0	0	0	0	0	0	0	0	0	0	0	0	0.0465043	0	0	0	0	0	0	0	0	0	0	0	0	0	0	0	0	0	0	0	0	0	0	0	0	0	0	0	0	0	0	0	0	0	0	0
AC017071.1	0.0461829	0.0533148	0.0068614	0.0276625	0.0190746	0.0197581	0.239122	0.086615	0.0208652	0.065505	0.0768652	0.0516245	0.102353	0.073871	0.0400769	0.05684	0.0149382	0.0504859	0.143719	0.0678976	0.110826	0.0889309	0.0538205	0.00959974	0.0260111	0.076319	0.0307758	0.0143477	0.044305	0.0484578	0.0125815	0.0983507	0	0.0319129	0.0582982	0.0574262	0.0745804	0.025478	0.0193999	0.0176033	0.0588141	0.0439498	0.0167637	0.0402027	0.0675497	0.109515	0.0554118	0.0123801	0.0500674
AP001596.1	0	0	0.0201903	0	0	0	0.0413905	0.00772341	0	0	0	0	0.00717101	0.00805082	0	0	0	0.00825329	0	0.00739981	0.00679407	0.0363455	0.0316743	0	0.0127567	0	0.0150934	0	0.00869143	0	0.0123408	0	0	0.00782555	0.0214435	0	0.0365766	0	0.0253716	0	0	0.0172435	0	0	0	0.00826305	0.0135879	0	0.0491093
EPHA1-AS1	0.0191473	0.00736806	0.0426708	0.0315392	0.113352	0	0.00291587	0.0130583	0.126877	0.00678955	0.0504578	0.00237815	0.824456	0.0204178	0.0138465	0.00673307	0.0867067	0.0209313	0.615717	0.0125112	0.0258459	0.0215078	0.0312394	0.00398003	0.0674008	0.00791042	0.057418	0.023794	0.02939	0.0172204	0.00260814	0	0	0	0	0.00264542	0.0309208	0.0316894	0.0053621	0.00729827	0.0670565	0.0182215	0.0243256	0.0194459	0.0168036	0.00349268	0.0057434	0.0102655	0.139374
AC005884.2	0	0	0.0612248	0	0	0	0.0627561	0	0	0	0.0571562	0	0	0.0732396	0	0	0	0	0.213736	0.0673173	0.0618068	0	0.288147	0	0	0	0	0	0	0.0617704	0	0.109699	0.148009	0	0	0	0.0665486	0	0	0	0	0	0.0747918	0	0.0602751	0	0.0618055	0	0
LUCAT1	0.00701013	0.0134878	0.0260374	0.0262431	0	0	1.12626	0.0239043	1.12962	0.15536	0.0291685	0.0043534	0	0.0062294	0.0405553	0.0924406	0.0453496	0.0319303	0.00605977	0.0114514	0.00525698	0.0224981	0.931316	0.029143	0.261571	0.0651629	0.303646	0.0544461	0.450581	0	0	0.0279913	0.12589	0.0181653	0.0663684	0.0242132	0	0	0.00490788	0	0.0223186	0.0266847	0	0.015256	0.0307602	0	1.42987	0.0281877	0.792547
AC093620.1	0.139674	0.0335923	0.103757	0.0261441	0.0961475	0	0.292467	0.0297676	0.0262933	0.0309548	0.0484308	0.0216848	0.0276385	0.124118	0	0.122789	0.225892	0	0.241476	0.0285204	0.104743	0.0840496	0.203465	0.0362913	0.0491668	0	0	0.081361	0.167493	0	0.0951277	0	0.0627073	0.0603225	0	0.0241218	0.0563894	0.0481591	0.0244468	0.199645	0.0555859	0.0332299	0.0633742	0.101323	0.178757	0.0318475	0.0523704	0.0936044	0.0270396
LINC00028	0	0	0	0	0.0238731	0	0	0	0	0.0307438	0	0.0215371	0	0.030818	0	0.0304881	0	0	0.0299788	0.028326	0	0	0.0808316	0	0.0244159	0	0	0.053871	0	0.025992	0	0	0	0	0.0273614	0	0	0	0.0242802	0	0	0	0	0	0	0	0	0	0.0268553
AC084026.1	0	0	0	0	0	0	0	0	0.0271791	0	0	0	0	0	0	0	0	0	0	0	0	0	0.0420639	0	0.101646	0	0.0601328	0	0	0	0	0	0	0	0	0	0	0	0	0	0.114917	0	0	0	0.0527941	0	0	0	0
AC072062.1	0	0	0	0	0	0	0.0121957	0	0.00804039	0	0	0	0	0	0.00386089	0	0.00863462	0	0.00461515	0	0	0	0	0	0.0075175	0	0	0	0	0.00400139	0.00363621	0	0	0	0.0336977	0	0.00862183	0	0.00373786	0	0	0	0.00968979	0	0	0	0.00400366	0	0
LINC01338	0	0	0	0	0	0	0.0735796	0.0823789	0	0	0	0	0	0	0	0	0	0	0	0	0	0	0	0	0	0	0	0	0.185408	0	0	0	0	0	0	0	0	0	0	0	0	0	0	0	0.0942275	0	0.410635	0	0
CELF2-AS1	0.00824855	0.00793529	0.0245098	0.0185276	0.0454246	0	0	0.0210954	0	0.00731225	0.0114405	0	0.0783465	0	0.626323	0	0	0	0.0356515	0.00673718	0.148457	0.0727999	0.461408	0	0.00580718	0	0.0412256	0.0128129	0	0	0.00561785	0.0109788	0	0.0071248	0.0846009	0.0113963	0.026641	0.0113763	0.190572	0.062881	0	0	0.00748525	0.0179511	0.0603239	0	0	0	0.0255496
AC100788.1	0.0215422	0	0	0	0	0	0.0164029	0	0.0162212	0	0	0	0	0	0	0	0	0.039249	0	0	0	0	0.0251048	0	0.060665	0	0.0358888	0	0	0	0	0	0	0	0.0169959	0	0	0	0	0	0	0	0	0	0.0157544	0	0	0	0
LINC01322	0.0437794	0.0947628	0.0650431	0.0163893	0.0678073	0.15218	0.108339	0.00933037	0.0164828	0.0388099	0.0151802	0.0611723	0.0259891	0.126437	0.0554037	0.00962177	0.017701	0.039882	0.331137	0.00893945	0	0.0263446	0.0255097	0.0568759	0	0.0565212	0.0182338	0	0	0.0164057	0	0.291351	0	0.00945377	0.0777153	0	0.300471	0	0.168578	0	0.0174229	0	0.0198641	0.0158794	0	0.0099823	0	0.0146697	0.0254259
Z97989.1	0.210217	0.0647148	0.0999424	0.0629575	0.109978	0.062955	0.224092	0.0788515	0.139297	0.0819962	0.174939	0.0731069	0.0399337	0.156916	0.182423	0.251334	0.108794	0.0459607	0.319824	0.0755478	0.170256	0.310346	0.264581	0.0961322	0.0769589	0.0694784	0.30819	0.117555	0.169402	0.107135	0.114538	0.0447676	0.196307	0.0798943	0.0729751	0.0406614	0.169739	0.104375	0.0941923	0.0961526	0.0669281	0.0800209	0.114458	0.0853982	0.153738	0.214737	0.157641	0.135245	0.162785
AC006252.1	0.258859	0.0355755	0.0137353	0.0276876	0.229104	0	0.0844728	0	0.515144	0	0.0128225	0.0229651	0.556134	0.0164307	0.280793	0	0.0299035	0.0168439	0.0799163	0.0151021	0.0554633	0.0593411	0.129286	0.0384338	0.0390521	0.0572913	0.184822	0.0430821	0.0532143	0.041573	0.0251859	0.02461	0.116216	0.0319419	0.437634	0	0.0895777	0.0255012	0.466021	0	0.0294338	0.0527876	0.0335578	0.0134131	0.067611	0	0.0693277	0.0247826	0.14318
LINC01728	0	0	0	0	0	0	0.0295816	0	0	0	0	0.0241265	0	0	0	0	0	0	0	0	0	0	0	0	0	0	0	0	5.73963	0	0	0	0	0	0	0	0	0	0	0	0	0	0	0	0	0	0	0	0
AL645608.1	0.0864434	0	0	0	0.0595053	0	0.0329103	0	0.0976369	0.0383156	0.0299736	0	0.0342107	0	0	0.0759936	0	0	0.112086	0	0	0.0346787	0	0	0.0304291	0	0.216019	0.201416	0	0	0.0294371	0	0	0.0746667	0.170501	0.0597156	0.0348992	0	0.03026	0.0823728	0	0	0	0.0313541	0.158046	0.0394205	0.0648236	0.173794	0.0334694
AC116096.1	0	0	0	0	0	0.00940943	0.00669869	0	0	0.00779889	0	0.00546338	0	0.00781771	0.00636196	0.015468	0.0142281	0.00801432	0.0152097	0	0.00659736	0.00705862	0	0	0	0	0	0.00683282	0	0.0131869	0	0	0	0	0	0.00607737	0	0	0.00615924	0	0	0.0167442	0	0	0	0	0.00659722	0.0117916	0
LINC01432	0	0	0	0	0	0	0	0	0	0	0	0	0	0	0	0	0	0	0	0	0	0	0	0	0	0	0	0	0	0	0	0	0	0	0	0	0	0	0.0210524	0	0	0	0	0	0	0	0	0	0
YEATS2-AS1	0.15559	0.0538853	0.0369857	0.0465974	0.0685466	0.0066565	0.184815	0.0265278	0.0656087	0.0275858	0.0215799	0	0.162561	0.0331829	0.112516	0.0547126	0.0503268	0.0340174	0.0968378	0.0254163	0.0466716	0.12983	0.166815	0.0323415	0.0876314	0.0128559	0.0829469	0.0628385	0.0119411	0.00932882	0.0551034	0	0.00558825	0.0161272	0.0343712	0.0171972	0.0502523	0.0343342	0.0610011	0.0711665	0.0891652	0.0829174	0.0451815	0.0316034	0.0227575	0.0170288	0.0466706	0.00834169	0.0433741
AC093627.6	0	0	0	0.0503868	0.16214	0.251924	0	0.0286851	0.0506744	0	0.0466697	0.0417926	0.0266335	0.119605	0	0	0	0	0	0	0	0	0	0	0	0.0347535	0.0560577	0	0.0968412	0	0.0458343	0.179145	0	0	0	0.0464894	0	0.139224	0.141347	0	0	0.0960647	0.0916046	0	0	0	0	0	0.0260563
AC093382.1	0.0537135	0	0.0798023	0.120649	0	0.229799	0.531688	0.0457902	0.0404459	0	0.111749	0.0333569	0.382637	0.0954627	0.11653	0.0944406	0	0.0978635	0.371453	0.0438717	0.322243	0.172387	0.187789	0.0558254	0.0378156	0.0554773	0	0.0417181	0.618353	0.322053	0.0365828	0.142985	0.04823	0.0463958	0.211889	0	0.216854	0	0.188027	0.409473	0.0855055	0.357814	0.048743	0	0.0392822	0	0.120839	0	0
AL449983.1	0	0	0.0365279	0	0	0	0	0	0	0.0435909	0	0.0305369	0.0389209	0	0	0	0	0.044795	0	0	0	0	0	0	0	0	0	0	0	0	0	0	0	0	0	0.0679374	0	0	0	0	0	0	0	0	0	0	0	0	0
AC007179.2	0	0.0241087	0	0	0	0	0	0	0	0.00740526	0	0	0.00661192	0	0.00604086	0	0	0	0	0	0	0	0	0	0	0	0	0	0	0	0	0	0	0	0	0	0	0	0	0	0	0	0	0	0	0.00761882	0	0	0
AC099684.2	0.304191	1.62077	0.0869111	0.210235	6.894	1.9521	2.40529	1.3365	1.65624	1.76318	2.06084	2.35408	17.0949	5.17754	4.67029	2.07764	0.719025	0.959231	10.1136	0.955596	13.1957	3.11653	2.39968	1.55644	1.72974	1.66757	1.36439	3.74379	1.45911	2.36751	0.733085	1.37035	2.16409	0.565922	1.7538	0.113151	5.12019	4.61492	6.61839	5.93113	0.409738	5.38883	0	3.53069	0.359364	1.53658	1.63188	1.5995	2.64547
LINC00114	0.0103232	0	0	0	0.00710624	0	0.00786043	0.00880045	1.08049	0	0.00715901	0	0.0653682	0	0.0074653	0	0.0166956	0.0282127	0.00892372	0	0.10064	0.00828278	0	0	0.174427	0	0.0171982	0.00801782	0	0	0	0	0.0556161	0	0.040723	0	0.0166709	0	0	0	0	0.00982406	0.00936794	0	0	0	0.0464482	0	0.0799396
AC112493.1	0	0	0.153442	0	0	0	0.594167	0.0195654	0	0.0203457	0	0	0.635811	0.0203948	0.315344	0	0.111354	0.0627231	0.416628	0.0187456	0.0860557	0.0184145	0.0267464	0	0.016158	0	0	0	0.0220176	0	0	0.061095	0	0	0.0543218	0	0.481821	0	0.0482045	0	0.401885	0	0	0	0	0	0	0	0.177724
AC110603.1	0	0	0	0	0	0	0	0	0	0	0	0	0	0	0	0	0	0	0	0	0	0	0	0	0	0	0	0	0	0	0	0	0	0	0	0	0	0	0	0	0	0	0	0	0	0	0.0326196	0	0
AL157359.1	0	0	0	0	0	0	0	0	0	0	0	0	0	0	0.0347207	0	0	0	0	0	0	0	0	0	0	0	0	0	0	0	0	0	0	0	0	0	0	0	0	0	0	0	0	0	0	0	0	0	0
AC094108.1	0	0.0660516	0	0	0	0	0	0	0	0	0	0	0	0	0	0	0	0	0	0	0	0	0	0	0	0	0	0	0	0	0	0	0	0	0	0	0	0	0	0	0	0	0	0	0	0	0	0	0
AL357146.1	0.0197837	0	0.0367408	0	0	0	0.0376598	0	0	0.00876901	0.00685985	0	0	0.0175804	0.00715334	0	0.0799898	0	0.196669	0	0.00741802	0.00793666	0	0	0	0	0.0329591	0	0	0	0	0	0.00888201	0	0.0468255	0	0.0239614	0.0136427	0	0	0.0157466	0.00941354	0	0.0071758	0	0	0	0	0
AC107909.1	0.0684283	0	0	0.0256168	0	0	0.0260517	0	0	0	0	0	0	0	0.0247421	0	0	0	0	0	0	0	0	0	0	0	0	0	0	0	0	0	0	0	0	0	0	0	0	0	0	0	0	0	0	0	0	0	0
SCAANT1	0.718497	0.230404	0.059304	0.239091	0.164865	0.170772	0.364724	0.0680568	0.120227	0.212313	0	0.099155	0.379135	0.283768	0.288658	0	0.129113	0.145452	0.345051	0.326027	0.359207	0.384321	0.279107	0.165944	0.112409	0.164909	0.797998	0.744054	1.22539	0.418827	0.706836	0.212515	0.143366	0.275828	0	0	0.0644608	0.22021	0.111784	0	0.254169	0.303891	0.144891	0.289565	0.29192	0.072812	0.299333	0	0.12364
C9orf106	0.0129459	0.049817	0.0625097	0.0533107	0.00891161	0.0346159	0.147861	0	0.0438668	0.0631202	0.0269334	0.0080396	0.00512345	0.0115041	0.00936189	0.0682855	0	0.0235868	0.0447633	0.0211477	0	0.0467418	0.052804	0.0336372	0.159499	0.013371	0.043135	0	0.0496779	0.00485128	0.00440854	0	0.0174364	0.0167733	0	0.0223578	0.0156797	0.00892743	0.00453179	0	0.0927374	0.00615995	0.140975	0.0375651	0.00946769	0.0708441	0.694128	0.0433794	0.0852113
AC093673.2	0	0	0	0	0	0	0	0	0	0	0	0.0381942	0	0	0	0.108136	0	0	0	0	0	0	0	0	0	0	0	0	0	0	0	0	0.0552241	0	0	0	0	0	0	0	0	0	0	0	0	0	0	0	0
MHENCR	1.70281	1.41809	2.43546	1.00852	2.93916	1.25041	3.79294	1.55995	0.765493	3.42458	1.28662	1.16795	7.76494	1.51316	1.47032	2.4577	3.08275	1.96796	5.49238	1.05867	5.12688	3.56852	2.81372	0.977328	2.20081	1.10248	2.37108	1.48044	9.36252	1.50478	3.54844	1.8605	3.92511	0.76834	1.74447	0.719831	1.29284	1.64745	2.36652	1.69528	1.57785	1.37861	3.6901	1.21682	2.43486	0.741756	2.00116	1.29445	1.69252
AL117378.1	0	0.00649132	0	0	0	0	0.00513781	0	0	0	0	0	0	0	0	0	0.0327383	0	0	0	0	0	0	0	0	0	0	0.00524068	0	0	0	0	0	0	0	0	0	0	0	0	0	0	0	0.00489486	0	0.00615415	0	0	0
AL645728.1	0.0678258	0.214393	0.136758	0.195876	0.0666992	0.238357	0.258223	0.140422	0.0437763	0.137433	0.114231	0.126362	0.138048	0.120544	0.203201	0.195916	0.219387	0.335419	0.402039	0.142453	0.159856	0.233227	0.169377	0.181266	0.150075	0.140106	0.20985	0.21824	0.213794	0.123453	0.0857893	0.219241	0.0696018	0.108802	0.0764453	0.234272	0.070413	0.0534541	0.0949713	0.0923312	0.0925462	0.0829879	0.105513	0.154637	0.205498	0.203257	0.138055	0.155844	0.112547
AC211486.2	0	0	0	0	0	0	0	0	0	0	0	0	0	0	0	0	0	0	0	0	0	0	0	0	0	0	0	0	0	0	0	0	0	0	0	0	0	0	0	0	0	0	0	0	0	0	0	0	0
AP000347.2	0.045586	0.0375898	0.0387013	0.0195035	0.0224144	0.00696527	0.173553	0	0.0980742	0.0115461	0.0587103	0.0363981	0.0824735	0.0405091	0.141282	0.148851	0.0526612	0.00593255	0.29273	0.0106381	0.0537201	0.0783764	0.0455356	0.0135367	0.0366785	0	0.0325479	0.0505795	0.0687223	0.0244038	0.0975774	0.0173356	0.0350848	0	0.0256896	0.0134962	0.110425	0.0718535	0.0638307	0.0248225	0.0103668	0.0557766	0.0354579	0.0141725	0.0762019	0.0296978	0.0586025	0.0436431	0.0806863
AC034228.1	0	0.0212181	0	0	0	0	0.0167939	0	0	0	0	0	0.0174575	0	0	0	0	0	0	0	0	0	0	0	0	0	0	0	1.1849	0	0	0	0	0	0	0	0	0	0	0	0	0	0	0	0	0	0	0	0
AC005332.4	0.558433	0.117213	0.196103	0.220458	0.29355	0.108596	0.510249	0.0865561	0.389915	0.171015	0.211235	0.245909	0.281279	0.225563	0.0660818	0.357037	0.311996	0.286733	0.798693	0.14098	0.281722	1.70261	1.01759	0.232156	0.221594	0.146814	0.94725	0.433722	0.389619	0.251117	0.172879	0.108112	0.145869	0.131551	0.200264	0.182364	0.18856	0.168041	0.227471	0.135453	0.274769	0.502443	0.14742	0.154675	0.928176	0.120385	0.258874	0.176915	0.251596
AC092296.3	0.572297	0	0.303665	0.0612129	0.337675	0.349774	0.249008	0.418181	0.184687	0.434858	0.0566971	0.253861	0.129424	0.363257	0.118246	0.0718735	0	0.0744785	0.70673	0.133553	0.858345	0.131194	0.0952774	0	0	0.506648	0	0.190496	0	0.367645	0.0556822	0.217635	0.0734103	0.282474	0.258011	0.056478	1.12224	0.451032	0.114478	0.779068	0	0.0778034	0	0.35585	0	0.2237	0.122618	0.109581	0.0633096
AC006213.5	0.282742	0.136002	0.210035	0	0.24329	0	0	0.241035	0.159677	0	0	0.13169	0.335693	0.251253	0.255583	0.124281	0	0	0.549924	0	1.3252	0.226856	0	0.0734647	0	0.146013	0.35328	0.1098	0.203434	0.105953	0.288851	0.094082	0	0.0610556	0.0557679	0	0.799046	0.0974888	0.148463	0.269428	0	0.0672676	0.256578	0.0512771	0.103389	0.128938	0.212027	0.189484	0.164209
LEF1-AS1	0.0212101	0	0.0189071	0	0.0116804	0	0.0646	0	0.00958262	0.0037605	0.00294177	0	0.00335763	0	0.00306763	0	0	0	0	0	0.00318114	0	0.054379	0	0.0238918	0	0.00706708	0	0.34184	0	0.0115565	0	0.0571343	0	0	0	0	0	0.00296988	0	0	0	0	0	0.0062046	0	0.0413539	0	0.049273
AC023421.2	0	0.0267911	0.0620624	0	0	0	0.0212049	0	0.0209699	0.0246876	0	0	0	0.0247472	0	0	0	0.101478	0	0	0	0.0223442	0	0	0.0392124	0	0.0463952	0.0216295	0.106865	0	0.037934	0	0	0	0	0	0	0	0	0	0	0	0	0	0	0.0253995	0.0208837	0	0
AD000671.3	0.0399165	0	0.029652	0.0298863	0.00686936	0	0.0303936	0.0085071	0.0225426	0.00884639	0.0138408	0.0123944	0.023696	0	0.0360823	0.0175456	0.0322782	0.0272723	0.0603838	0.0326027	0.0224504	0.00800669	0	0.0311144	0.0140511	0.0103068	0	0.0310022	0.0765868	0	0.040779	0	0.0268811	0.0172392	0.00787312	0.0206809	0.0322304	0.0137631	0.0349325	0.0380368	0.0317712	0.0094966	0.00905568	0.00723912	0.0583841	0.0091015	0.0224499	0.0133753	0.015455
Z93403.1	0	0	0	0	0	0	0.296268	0	0	0.0137971	0	0	0	0	0.011255	0	0	0	0	0	0.0350144	0	0	0	0	0	0.155573	0	0	0	0	0	0	0	0.0122792	0	0.0251338	0	0	0	0	0	0.0988648	0.0225807	0	0	0	0	0
WWTR1-AS1	0.179877	0.00752374	0.0522869	0.00585556	0.0376852	0.033459	0.0774145	0.0266684	0.0530008	0.0693301	0.0325415	0.0145704	0.092854	0.0347487	0.0678674	0.061878	0.0252968	0.0284981	0.0338025	0.0191633	0.0117298	0.0439245	0.0637989	0.0243847	0.066072	0.0161551	0.0260583	0.0242968	0.0375137	0.0234457	0.0639179	0.0208188	0.0561788	0.0270212	0.117235	0.0108053	0.0568335	0.0107863	0.0821311	0.014905	0.0248994	0.0148852	0.0354852	0.0170201	0.00571953	0.0499306	0.0293238	0.0209648	0.0363367
AP002008.3	0	0	0	0	0	0	0	0	0.0059254	0.0139518	0	0	0	0	0	0	0	0	0	0	0	0	0	0	0	0	0	0	0	0	0	0	0	0.00679707	0	0	0	0	0	0	0	0	0	0	0	0	0	0	0
AC090618.1	0	0	0.051701	0.0521095	0	0.148878	0.132485	0.0296658	0.0524068	0.123396	0.0965304	0.0432214	0.0550881	0.0309234	0.276816	0.244738	0.05628	0.0951033	0.090244	0.142114	0.0260962	0.111683	0.20277	0.217003	0	0.143767	0.0579742	0.243248	0.133536	0.0260808	0.118503	0.185269	0	0.0601163	0.247095	0.192315	0.140492	0.095989	0.0487264	0.0663207	0.0553959	0.099349	0	0.0252441	0.050899	0.0317386	0.0521913	0.0932844	0
Z98884.1	0.441486	0.117978	0.0910996	0.110183	0.27014	0.157398	0.672322	0.0627271	0.0738747	0.195686	0.272146	0.152316	0.194136	0.0871816	2.022	0.237182	0.0793344	0.0670306	1.18731	0.120198	0.331076	0.275507	0.142916	0.127457	0.155408	0.0759972	0.122584	0.285744	0.117648	0.220587	0.0835233	0.0326453	0.198208	0.0211856	0.232209	0.0677737	0.0792169	0.236792	0.274747	0.327209	0.117132	0.140046	0.378375	0.14234	0.0538119	0.15659	0.0735709	0	0.13295
AL358154.1	0	0	0	0.0343289	0	0	0	0	0	0	0	0	0.145164	0.0814873	0	0	0.0741527	0	0.0396342	0	0	0.0367875	0	0	0	0	0	0	0	0.0343633	0	0	0	0.0396036	0	0	0.0740429	0	0	0.087382	0	0	0	0.0332608	0	0	0	0	0
AL391069.3	0.197645	0.126759	0.220231	0.271298	0.272107	0.281857	0.476561	0.140409	0.223238	0.467227	0.159908	0.245481	0.756124	0.204905	0	0.0579175	0.372923	0.120033	0.2278	0.134526	0.321135	0.607886	0.49905	0.034236	0.115956	0.0340225	0.329271	0.383766	0.410818	0.197505	0.157045	0.21922	0.384513	0.0853593	0.259889	0.113779	0.186185	0.0454317	0.184498	0.125559	0.0524378	0.188088	0.0298925	0	0.433629	0.0300438	0.172915	0.264909	0.331607
AL590399.3	0	0	0	0	0	0	0	0	0	0	0.0179385	0	0	0	0	0	0	0	0.0223603	0	0	0	0	0	0.0182111	0	0	0	0	0.0193866	0	0	0	0	0	0.0178692	0.0208863	0	0	0	0	0	0	0	0.0378347	0	0.0193977	0	0
SLC7A11-AS1	0	0	0	0	0	0	0.0251595	0.00563366	0.0472733	0	0.00229144	0	0.00261536	0	0.119474	0	0.0053439	0	0	0	0	0.00265114	0	0	0	0	0.00550477	0	0.0158494	0	0.00450085	0	0	0	0.00782072	0.00228259	0	0	0	0	0.0262998	0	0	0	0.00241648	0.00301365	0.00743351	0	0.0102348
AC011330.2	0.416766	0.0308414	0.023815	0.0240032	0	0	0.146464	0.0273299	0.0241402	0.0284199	0	0.0398182	0	0.0284885	0.0463671	0.112734	0	0	0.30484	0	0.0961656	0.154334	0.0373607	0.0666388	0.157992	0	0.106819	0.0248994	0.215287	0.0240272	0.0436689	0.0426703	0.201503	0	0	0	0.129429	0.0884308	0.0897794	0.0610986	0.153102	0.0610175	0.0290923	0	0.117228	0.058479	0.216368	0	0.124127
AC104257.1	0	0.0199027	0	0	0	0	0.157528	0	0	0	0	0	0	0	0	0.0181875	0	0	0	0.0168977	0	0	0	0	0	0	0	0	0.0396944	0	0	0	0	0	0	0	0	0	0	0	0	0	0	0	0	0	0.0620568	0	0
AC107067.1	0	0.0236811	0	0.00921525	0.03389	0.0526564	0.00937168	0	0	0	0.0256062	0.00764345	0.019484	0.0546862	0.0178012	0	0	0	0.0106394	0.0100528	0	0.0197505	0.0143434	0	0.0259954	0	0	0	0	0.0368979	0	0	0	0	0.00971049	0.0170049	0	0	0.0258509	0.0234568	0	0.0117129	0	0.0178571	0.00900118	0.0112256	0.00922972	0.0164968	0
KRTAP5-AS1	0.861249	0.0334089	0.0464356	0.036402	0.0860604	0.0148573	0.312025	0.017763	0.0156899	0.0123143	0.0481664	0	0.263881	0.0246881	0.18584	0.0732712	0.0224659	0.0126545	0.0360237	0.0453835	0	0.0222909	0.0323767	0	0.215153	0.0286945	0.0347133	0.0647334	0.0333157	0.010411	0.846745	0	0.0436555	0.0239973	0.175352	0.00959607	0.0280408	0.0478962	0.0340387	0	0.154791	0.0132194	0.548346	0.010077	0.883829	0.0570125	0.0312507	0.00930934	0.0752976
AL445524.1	10.2286	1.66879	14.3079	1.463	2.63525	1.57809	7.37842	1.59777	4.8194	3.14623	1.89433	1.41158	2.30415	1.02765	10.7997	1.63014	1.64458	0.944513	9.70366	2.81737	3.66331	1.15183	5.29783	1.40914	13.3916	2.14172	7.97216	1.8738	10.8455	1.70356	5.90717	3.05191	23.2563	3.5478	4.07428	2.14871	7.00325	1.59496	2.4708	1.40599	6.85585	2.20105	1.93602	0.824451	11.68	1.25478	13.8754	1.52329	9.78886
LINC01581	0	0	0	0	0	0	0.0142339	0	0	0	0	0	0.0345249	0	0.00450614	0	0	0	0	0	0	0	0	0	0	0	0	0	0	0	0	0	0.00559509	0	0.0294971	0	0	0	0.0130877	0	0	0	0	0	0	0	0	0	0
AL365203.2	5.19574	0.580769	2.82307	0.800262	0.912887	0.666857	2.61486	0.295288	1.00604	0.649222	0.809856	0.387196	0.493503	1.02895	2.67665	1.36595	1.26445	0.405703	5.63773	0.824498	1.29878	1.00051	4.05973	0.545146	2.70338	0.684849	1.43442	0.676413	1.1488	0.415366	0.579669	0.421517	0.719792	0.666774	4.12265	0.758871	3.37221	0.586923	1.20561	0.716727	0.992521	0.452069	0.772352	0.366144	1.96142	0.451314	0.30428	0.543856	2.13049
AC106820.3	0.256391	0	0.114276	0.038393	0.494179	0	0.117134	0.174856	0.656406	0.18183	0.0711213	0.191067	2.84113	0.273403	1.63161	0.180317	0.248794	0.0934264	3.10285	0.293178	2.07652	0.287999	0.298792	0.106589	1.19133	0.370734	0.512568	0.477919	0.688703	0.115294	0.244469	0.0682509	0.368346	0	1.37551	0.0708465	0.207022	0.0707224	2.29763	0	0.326515	0	0.325731	0	0.300009	0.187074	0.499893	0.137459	0.238248
LINC01243	0	0	0	0	0	0	0	0	0	0	0	0	0	0	0	0	0	0	0	0	0	0	0	0	0	0	0	0	0	0	0	0	0	0	0	0	0	0	0	0	0	0	0.0512443	0	0	0	0	0	0
AC079160.1	0	0.0109166	0	0	0	0	0.0345613	0	0	0	0.00393466	0	0.00449087	0	0.008206	0.00498787	0	0	0.00980913	0	0	0	0	0	0	0	0	0	0	0	0	0	0	0	0	0	0	0	0.00397226	0	0	0	0	0	0	0	0	0	0
AC037441.2	0	0	0	0	0	0	0	0	0	0	0	0	0	0	0	0	0	0	0	0	0	0	0	0	0	0	0	0	0	0	0	0	0	0	0	0	0	0	0	0	0	0	0.0205719	0	0	0	0	0	0
AC009053.2	0.0430389	0.0496853	0.0383658	0.0322241	0.0118507	0.0644456	0.0196627	0.0366903	0.0583345	0.0305228	0.0298469	0.0534557	0.115825	0.0535439	0.0435733	0.0378361	0.0417638	0.0078415	0.0148817	0.0210918	0.0516407	0.0759704	0.0300939	0.00894623	0.0303005	0.0889044	0.0143403	0.0133709	0.0247733	0.090318	0.0410377	0.0229138	0.0386452	0.0297404	0.0203736	0.0416242	0.0417019	0.0831025	0.0421849	0.0164049	0.0411077	0.0819157	0.109357	0.0686874	0.0440658	0.0863585	0.103279	0.0692237	0.0599902
AF131215.7	0.0287941	0	0	0	0.0198211	0	0	0	0	0	0.0798731	0	0.022791	0.0255872	0.0416452	0.0253133	0	0.0524615	0.0248905	0.0235182	0	0.0231028	0.16778	0	0.0405435	0	0	0	0	0	0.0196108	0	0.0258546	0	0	0	0.0232497	0	0	0	0	0	0	0.020888	0.0842317	0	0	0	0
AL391832.2	0.219948	1.08149	1.00756	0.924036	0.437396	1.33307	8.02951	1.55211	0.322038	1.51652	0.567754	0.645014	1.11226	0.91211	3.31368	1.40723	0.612628	0.567708	4.28849	0.538942	4.62754	1.04904	1.69458	0.482591	0.567779	1.19896	0.427499	0.351148	5.0055	0.531166	0.790613	1.02462	4.64111	0.56995	0.723041	0.962296	1.39117	0.455026	0.624508	1.02467	1.1671	0.674452	0.643138	0.709138	0.294899	0.612958	1.14541	0.589606	1.64643
AP002414.5	0	0	0	0	0	0	0	0	0	0	0	0	0	0	0	0.0693663	0	0	0	0	0	0	0	0	0.111102	0	0	0	0	0	0	0	0	0	0	0	0	0	0	0	0	0	0	0.0572395	0	0.0719654	0	0	0
AL360169.1	0	0	0.211504	0	0	0	0	0	0	0	0	0	0	0	0	0	0	0	0	0	0	0	0	0	0	0	0	0	0	0	0	0	0	0	0	0	0	0	0	0	0	0	0	0	0	0	0	0	0
LINC02057	0	0	0	0	0	0	0	0.0502543	0	0	0	0.012203	0	0	0	0	0.0317797	0	0.0339722	0	0	0.0157661	0	0	0	0.0202953	0	0.0457852	0	0.0441813	0	0	0	0	0	0.0135744	0	0	0	0	0	0.0186999	0.0178316	0	0.0431118	0	0	0	0
LINC01361	0	0.0123482	0.00953501	0.0288311	0.00883575	0	0.039094	0.0328269	0	0	0	0.0159423	0.0101597	0	0	0.0338521	0	0	0.366154	0.0104838	0.0577539	0	0.104709	0	0.0271099	0	0.0427679	0	0	0	0	0	0	0	0.0303805	0.00886698	0.0103641	0	0.0449321	0	0	0.0244301	0	0	0	0	0	0	0.00993952
LINC01632	0	0	0	0	0	0.0463758	0	0	0	0	0	0	0	0.0192654	0.0940675	0	0	0	0	0	0	0	0.0757957	0	0	0	0	0	0	0	0.118125	0	0	0.0374526	0.0342091	0	0.0175053	0	0.0151784	0	0	0	0	0.0314543	0	0.0395465	0.260123	0	0
AC083841.2	0	0	0	0	0	0	0	0	0	0	0	0	0	0	0	0	0	0	0	0	0	0	0	0	0	0	0	0.0262644	0	0	0	0	0	0	0	0	0	0	0	0	0	0	0	0	0	0	0	0.045325	0
SNAP47-AS1	0.0476755	0	0	0	0.00820463	0	0.00907539	0.0101607	0.0179497	0	0	0.0074018	0	0	0	0.010478	0	0	0.0618182	0	0	0	0	0	0.0419558	0	0.0198565	0	0	0.0178657	0.0081176	0	0	0	0.00940349	0.00823363	0.0192477	0	0	0	0	0.0113425	0	0	0.0087166	0.0108706	0.0178758	0	0.00922956
CLIP1-AS1	0	0.010826	0.0250788	0.0168513	0.0619724	0.0240723	0.0257061	0.0191868	0.0423687	0.00997602	0.0234122	0.0209656	0.0801655	0.0300003	0.0651037	0.0395721	0	0	0.0875501	0.00919147	0.0421954	0.0090291	0	0.0584793	0.0158453	0.0232459	0.0374958	0.00874027	0	0.0253023	0.0766438	0.0299565	0	0	0.0443924	0	0.0272596	0	0.00787865	0	0	0.0107093	0.0306361	0.0244905	0.0164599	0.0205274	0.0759501	0	0
LINC02381	1.04092	0.486389	0.70697	0.30061	1.01339	0.477139	0.339681	0.291566	0.683031	0.527294	0.855923	0.489438	0.341333	0.462496	0.0430141	0.614416	1.20248	0.23029	0.231378	0.352223	0.412602	1.44366	0.797156	0.401829	0.471107	0.491475	1.04049	0.542822	1.96866	0.568387	3.01806	0.376053	0.507384	0.295422	0.0938563	0.441717	0.120069	0.512724	0.322737	0.481782	0.213045	0.693411	0.215908	0.539364	1.30501	0.745938	0.167268	0.697588	0.564237
ILF3-DT	7.06299	3.49614	6.3449	3.28976	5.63932	4.7324	5.91733	2.62549	3.39356	4.74145	3.53829	4.66036	17.3565	6.7325	5.92426	6.84092	4.30018	3.6099	10.2054	2.75865	6.46681	6.75421	7.08252	2.87012	2.3128	2.60836	3.74552	2.99	11.7591	4.36252	7.06178	3.82591	2.30448	1.70254	1.84667	1.67366	4.54249	2.9167	5.7283	2.75868	5.29487	3.40958	6.28829	5.81626	4.03168	3.96996	4.54207	3.38491	3.25139
AC026740.1	0.643408	0.0247589	0.516193	0.0770772	0.0177162	0.0550529	0.352735	0.0219399	0.755791	0.0456299	0.0535433	0.0799132	1.01854	0.13722	0.55834	0.135751	0.166492	0.0937807	1.98001	0.0630621	1.0808	0.289091	1.25968	0.0534964	0.88783	0.0265814	0.557388	0.479731	0.617245	0.192886	0.490792	0.171274	2.56509	0.0666903	0.0406098	0.106673	0.187026	0.141981	0.180183	0.0980976	0.163877	0.0979674	0.233547	0.0933489	0.357612	0.234729	0.984278	0.0689903	0.27901
AC087477.2	0.272558	0.140336	0.116919	0.0344907	0.142698	0.127282	0.0847675	0.111268	0.0144531	0.122512	0.143758	0.121583	0.109387	0.262671	0.0499695	0.165365	0.130379	0.0524566	0.175876	0.0689802	0.0978792	0.215605	0.165527	0.0997446	0.0459449	0.0753332	0.134304	0.113299	0.0184138	0.0863131	0.0209163	0.0868613	0.0206817	0.0298428	0.0969182	0.0291709	0.0619933	0.127068	0.043002	0.0951101	0.0672209	0.0547984	0.0104508	0.055696	0.115106	0.119042	0.100756	0.0720346	0.104044
AC091544.5	0.0912889	0.043911	0	0.0683499	0	0.146458	0.0695101	0.0389114	0	0.161853	0.126615	0.0850377	0.180642	0.040561	0.297072	0	0	0.041581	0.0394565	0	0.0342293	0.073245	0	0.0474391	0.0321348	0	0	0.070902	0.0875769	0.205255	0.0621743	0	0	0	0.108035	0.0315315	0	0	0.0639124	0	0	0	0.0414206	0.0331116	0.200286	0	0.479201	0	0.106036
ZBED3-AS1	0.0757271	0.0475117	0.0195666	0.0271166	0.0317304	0.0387365	0.0777169	0.0561362	0.0619804	0.0321062	0.0913315	0.0490724	0.109454	0.0672933	0.0476195	0.0144723	0.0425991	0.0389919	0.0768453	0.0349597	0.0592578	0.116235	0.0306959	0.0136877	0.0880835	0.0374066	0.115189	0.0383579	0.0379032	0.0246762	0.121091	0.0657342	0.0502581	0.0455029	0.176639	0.0454894	0.079755	0.0272458	0.161357	0.119223	0.0419299	0.0689321	0.0268902	0.0143307	0.0168552	0.0270263	0.0518495	0.0794343	0.0968842
FAM138B	0	0	0	0	0	0	0	0	0	0	0	0	0	0	0	0	0	0	0	0	0	0.0132578	0	0	0	0	0	0	0	0	0	0	0	0	0	0	0	0	0	0	0	0	0	0	0	0	0.0123912	0	0
AC004241.4	0	0	0.0135023	0	0.0125121	0	0.0276799	0	0	0.0161131	0	0.0112877	0	0	0	0	0	0	0.0471364	0	0	0	0.0211822	0	0	0	0	0	0	0	0	0	0	0	0.0286806	0	0	0	0	0	0	0	0	0	0.0132928	0	0.0136303	0.0243622	0
AL136985.2	0.114154	0	0	0	0.0523869	0	0.17384	0	0.200566	0	0.079164	0	0.120473	0.0676269	0.0550339	0	0	0.0346638	0	0.0310792	0.11414	0.0915905	0.177376	0	0	0	0.126785	0	0.073008	0.0570366	0	0	0	0.0328673	0.0300209	0.157716	0.0307243	0	0.0532803	0	0.0605731	0	0.0690601	0	0	0	0.171207	0	0.0883967
AL357873.1	0	0	0	0	0	0	0	0	0	0	0.0500623	0	0	0	0	0	0	0	0	0	0	0	0	0	0	0	0	0	0	0	0	0	0	0	0	0	0	0	0	0.13758	0	0	0	0	3.06206	0.0658407	0	0	0
AL589642.2	0	0	0	0	0	0	0	0	0	0	0	0	0	0	0	0	0	0	0	0	0	0	0	0	0	0	0	0	0	0	0	0	0	0	0.0574296	0	0	0	0	0	0	0	0	0	0	0	0	0	0
AC011472.1	0.608218	0.103256	0.451816	0.187512	0.443309	0.153064	1.52556	0.183	0.161641	0.602611	0.19849	0.222184	0.821238	0.158965	0.310472	0.25162	0.4629	0.065185	1.05152	0.0876663	0.21464	0.459294	0.792192	0.297474	0.377824	0.184762	0.596044	0.194513	0.205936	0.107257	0.41424	0.142859	0.0642501	0.123613	0.28227	0.3213	0.664434	0.24672	0.475917	0.340928	0.455629	0.374523	0.357134	0.155724	0.156991	0.195786	0.643907	0.38363	0.277049
LINC02473	0	0	0	0	0.00638428	0	0	0	0.0069836	0	0	0	0	0	0	0	0	0	0.00801712	0	0	0	0.0108082	0.0096391	0.00652944	0	0	0	0	0.00695093	0.0126331	0	0	0	0	0	0.00748862	0	0.0129863	0	0	0	0	0	0	0	0	0	0
AC078778.2	0.0359037	0	0.0533423	0.0268819	0.148291	0	0.191367	0	0	0	0.0248987	0	0.142092	0.0319051	0.0778919	0	0	0.0327075	0.0620726	0	0	0.0864214	0.0836828	0	0.0505542	0	0.119629	0	0	0.0269088	0	0.0477877	0	0	0.0566531	0	0.0579806	0	0.0754099	0	0	0.0341676	0	0	0	0	0.0269241	0	0.0278026
AL390856.1	0	0	0	0	0	0	0.0493655	0	0	0	0.0224802	0	0.0256581	0	0.046884	0	0	0	0	0	0	0	0	0	0.0228218	0	0	0.025177	0.0621963	0	0.0220778	0	0	0	0	0	0	0.0447082	0	0	0	0	0	0	0	0	0.0729266	0	0.025102
MYLK-AS2	0	0	0	0	0	0	0	0	0	0	0	0	0	0.0437489	0.0356023	0	0	0	0.0212788	0	0.0184598	0	0.0860607	0	0	0	0.0410096	0	0	0	0.0167653	0	0	0	0.077684	0	0	0	0	0	0	0	0.0446761	0	0	0	0	0	0
AC015853.2	0.330344	0.0794495	0	0.0309169	0	0	0	0	0	0	0	0	0	0.0733882	0	0	0	0	0	0	0	0	0	0	0	0	0	0	0	0	0.0562469	0	0	0	0	0	0	0	0	0	0	0.117889	0.224831	0.0599099	0	0	0	0	0.191855
C5orf66-AS2	0	0	0	0	0	0	0.00632426	0	0	0	0	0	0	0	0	0	0	0	0	0	0	0	0	0	0.00584746	0	0	0	0	0	0	0	0	0	0	0	0	0	0	0	0	0	0	0	0	0	0.00622846	0	0
AL158209.1	0	0	0	0	0	0	0	0	0	0	0	0	0	0	0	0	0	0	0	0	0	0	0	0	0	0	0	0	0	0	0	0	0	0	0	0	0	0	0	0	0	0	0.0420811	0	0	0	0	0	0
AC023983.1	0.107711	0	0.0533423	0	0	0	0	0	0	0	0.0746962	0	0	0.0319051	0.025964	0.0315635	0	0	0	0	0	0	0	0	0.101108	0	0.299073	0	0	0.0269088	0	0.0477877	0	0.0310124	0	0	0	0.0495181	0.0754099	0	0	0	0	0	0.131287	0.0327462	0	0.0481229	0
AL354977.2	0.167781	0.053803	0.0623181	0	0	0	0.0212923	0	0	0	0	0	0	0	0	0	0	0	0	0	0.0419403	0	0	0	0	0	0	0	0	0	0	0	0	0	0.022062	0	0	0	0	0.0532934	0	0	0.0253758	0	0.0409009	0	0	0	0
AL353626.1	0	0.0772556	0	0	0	0	0	0	0.0302347	0	0	0	0	0	0	0	0	0	0	0	0	0	0	0	0	0	0	0	0	0	0	0	0	0	0	0	0	0	0	0	0	0	0	0	0	0	0.0301104	0	0
AP001970.1	0	0	0	0	0	0	0	0	0	0	0	0	0	0	0	0	0	0	0	0	0	0	0	0	0	0	0	0.0225551	0	0	0	0	0	0	0	0	0	0	0	0	0	0	0	0	0	0	0	0	0
LINC00603	0	0	0	0	0	0	0	0	0	0	0	0	0	0	0	0	0	0	0	0	0.0543284	0	0.0422136	0	0	0	0	0	0	0	0	0	0	0	0	0	0	0	0	0	0	0	0	0	0	0	0	0	0
AL109838.1	0	0.0699439	0	0.163307	0	0	0.221439	0	0	0	0	0.270906	0	0	0	0	0	0	0	0.17815	0	0.116669	0	0	0	0.0750925	0	0	0.627738	0	0	0	0	0	0	0.0502251	0	0.100274	0	0	0.231476	0.207568	0	0.0527421	0	0.198933	0	0.0974488	0
AC073284.1	0	0	0	0	0	0	0	0	0	0	0	0	0.0398843	0	0	0	0	0	0	0	0.0377878	0.0404298	0	0	0	0	0	0	0	0	0	0	0	0	0	0	0	0	0	0	0	0	0	0	0.0368513	0	0	0	0
AC013270.1	0	0	0	0.034641	0.0318489	0	0	0	0	0	0	0	0	0.0822281	0	0.0406738	0	0.042148	0.0399945	0	0.104088	0.111366	0.107837	0	0.032573	0	0.0770794	0.179672	0	0	0	0	0	0.0399637	0.0730053	0.0639229	0	0	0.064784	0	0	0.0440297	0	0	0.0338362	0	0	0	0
AC112721.2	0.301034	0.0362002	0	0	0	0	0	0	0	0	0.0260953	0	0	0	0	0	0	0	0.0325279	0	0	0	0	0	0	0	0.0626893	0	0	0	0.205026	0	0	0	0	0	0	0	0	0	0	0	0	0	0.0550386	0	0.028218	0	0.0291388
LINC02274	0	0.116772	0.0128812	0.025966	0.0119365	0.0185464	0.0132034	0.0443471	0.0130571	0.384298	0	0.0107685	3.00579	0.046227	0	0.137196	0.224353	0.0789827	0.0749471	0.028326	0.0390109	0.0973897	0	0.126154	0	0	0	0.0269355	0	0.0389879	0	0.0230797	0	0	0	0	0.0560052	0.0239155	0.339923	0	0.0552071	0.0330035	0.0472068	0.0503162	0.0507255	0.0474457	0.0260067	0.0232416	0
AP001266.2	0.0438738	0	0	0	0	0	0.0334068	0	0	0	0	0.0272463	0	0	0.0317275	0.0771401	0	0	0.113777	0	0	0	0.0511294	0	0	0	0	0	0	0	0	0	0	0	0.103844	0	0	0	0.0614331	0.0836155	0.0698418	0	0.0398138	0	0	0	0.0329008	0	0
TSPAN9-IT1	0	0	0	0	0	0	0	0	0	0	0.0251202	0	0	0	0	0	0	0	0	0	0	0	0	0	0	0	0	0	0	0	0	0	0	0	0	0	0	0	0	0	0	0	0	0	0	0	0	0	0
ELFN1-AS1	0	0.0198021	6.34565	0	0.0141694	0.0220156	0.0626927	0	0.154995	0.0182473	0.0142746	0.0255658	0.0325849	0.0731656	0	0.0180955	0	0.150011	0.195726	0.100874	0.0154361	0.0660613	0.263867	0	0.0579661	0.0212598	0.0685843	0	0.0592406	0.030854	2.85989	0.027397	0	0.0355592	0.276077	0	1.32963	0.0283891	0	0	0	0	0.0933953	0	0.120428	0.0750943	0	0	0.111576
AC008474.1	0	0	0	0	0	0	0	0	0	0	0	0	0.0281209	0	0	0	0	0	0	0	0.0266427	0	0	0	0.0250124	0	0	0	0.0681663	0	0	0	0	0	0	0	0	0	0	0	0	0	0	0	0	0	0	0	0
LINC02521	0.0488188	0	0.0181325	0	0.067211	0	0	0	0.0919005	0	0	0	0.0193205	0	0.0176518	0	0	0	0.0211002	0	0	0	0.113784	0	0.0171848	0	0.0813307	0	0	0	0.149621	0	0	0	0	0	0	0	0.205072	0	0	0	0.0664517	0	0.0178513	0	0.0183045	0	0.0378036
AL357793.2	0.0239499	0.0230404	0	0	0	0	0.0182362	0	0	0	0	0	0	0	0	0	0	0	0.0621091	0	0	0	0	0	0	0	0	0	0	0	0	0	0	0	0	0	0	0	0	0	0	0	0	0	0	0	0	0	0
AP001172.2	0	0	0	0	0	0	0	0	0	0	0	0.0541425	0	0	0	0	0	0	0	0	0	0	0	0	0	0	0	0	0	0	0	0	0	0	0	0	0	0	0	0	0	0	0	0	0	0	0	0	0
ZMYM4-AS1	0	0.0426673	0	0	0	0	0.0675414	0	0.0333965	0.117952	0	0	0.0702103	0	0	0	0	0	0.115017	0	0	0	0	0	0	0	0	0.0344469	0	0	0.0604134	0.0590318	0.0796478	0	0	0	0.0716232	0	0.0310511	0	0	0	0	0	0.0324356	0.0404511	0.0332592	0	0.0343444
AC097461.1	0.0505147	0.0485963	0.160821	0.0810458	0.104319	0.0617467	0.280234	0.0307595	0.0652067	0.0383835	0.0450401	0.0403334	0.0399833	0.102603	0.0626228	0.0444082	0.128381	0.0131479	0.130999	0.0294707	0.12988	0.10422	0.142967	0.0375006	0.0812881	0.0894402	0.288535	0.0448384	0.263072	0.0162254	0.132702	0.0576298	0.0907155	0.0373995	0.0455474	0.039881	0.320476	0.0597166	0.090941	0	0.0804134	0.0137349	0.00654859	0.0837592	0.0633305	0.0197452	0.216462	0.0773787	0.139703
AC079834.2	0.699819	0.0100484	0.0155182	0.00782043	0	0.0111716	0	0.0356172	0	0	0.0217305	0.0194596	0.00826745	0.00928178	0	0.0183648	0.0337853	0.0190304	0	0.0255937	0.0234986	0.0167611	0.0243449	0	0.0147071	0	0.0174012	0.0162249	0	0.00782826	0.0640245	0.0139023	0	0.0180441	0.0247221	0	0.00843382	0	0.0438763	0	0	0.00994	0	0.00757711	0	0	0.00783272	0	0.0161766
AL121906.2	0.732079	0.0270876	0.23008	0.0632449	0.116295	0	0.321593	0.0960138	0.445241	0.149765	0.0585791	0.0349717	0.512593	0	0.488683	0.0247531	0.136613	0.0769508	0.121698	0.0689933	0.548995	0.045183	0.426574	0.0292639	0.971333	0.0581629	0.234543	0.17495	0.459203	0.0211027	1.0739	0	0.556213	0	0.910799	0.0389019	1.09129	0.0776674	1.81359	0	0.313757	0.0535908	0.536577	0.0408514	0.185327	0.0256806	0.0422295	0.0377395	0.17443
AC021752.1	0.00762736	0	0.00566599	0.00571076	0.0367533	0	0.0116154	0.0130045	0.00574335	0.0270463	0	0.0047367	0.0241488	0	0.022063	0.0268213	0	0.0138967	0.0461533	0.0124596	0	0.0122395	0.0266662	0.031709	0.0161095	0	0.012707	0	0.0658549	0.011433	0.00519478	0	0.0068487	0.0197647	0.0120353	0.00526903	0.0246347	0.0105196	0	0.0145364	0.0364255	0	0.0276862	0.00553308	0.0111562	0.0278263	0.0228789	0.0102232	0.00590636
AC009075.1	0	0	0	0	0	0	0	0	0	0	0	0	0	0	0	0	0	0	0	0	0	0	0	0	0	0	0	0	0	0	0	0	0	0	0	0	0	0	0	0	0.0828813	0	0	0	0	0	0	0	0
KCNIP4-IT1	0.00206716	0	0	0	0	0	0.004722	0	0	0	0.00143355	0	0	0.00367388	0	0	0	0	0	0.0016884	0	0	0	0	0	0	0	0	0	0	0	0	0	0	0	0	0	0	0	0	0	0	0	0	0	0	0	0	0
AC134312.6	0	0.0882176	0.136239	0.240302	0.189372	0.343275	0	0	0	0.284519	0	0.113894	0	0.0407437	0.0663134	0.0806148	0	0.375915	0.0396342	0.337041	0.206301	0.110362	0	0.238264	0	0	0	0.0712214	0	0.240543	0.0312272	0.244105	0	0.0792073	0.108521	0.126694	0	0.252944	0	0	0.0729878	0.218165	0	0.0665216	0	0.0836354	0.0687656	0.122908	0
[truncated: 11,555 more rows]
[truncated: 51 more columns]
