# Supplementary material for: Co-expression analysis and ceRNA network reveal eight novel potential lncRNA biomarkers in hepatocellular carcinoma
Source: PeerJ. 2019 Dec 2;7:e8101. doi: 10.7717/peerj.8101 (PMC6894432; doi:10.7717/peerj.8101)
Supplement: Table S4 [file peerj-07-8101-s004.xls]

## Sheet: lnc_atrix
name	Degree	AverageShortestPathLength	BetweennessCentrality	ClosenessCentrality	ClusteringCoefficient	NeighborhoodConnectivity
SNHG16	11	2	0.00493525	0.5	0.509091	16.4545
LINC01184	10	2.03125	0.00096306	0.492308	0.755556	20
LINC01301	10	2.03125	0.00096306	0.492308	0.755556	20
AC145285.2	29	1.5625	0.0459971	0.64	0.3867	18.0345
AC007114.1	10	2.1875	0.0031271	0.457143	0.644444	16.8
LINC00672	18	1.8125	0.0197973	0.551724	0.385621	17.7778
AL009178.2	20	1.75	0.0408233	0.571429	0.378947	17.1
AC010969.2	10	2.03125	0.00096306	0.492308	0.755556	20
PKD1P6-NPIPP1	11	1.9375	0.00342516	0.516129	0.563636	20.9091
HCG17	22	1.76562	0.0176919	0.566372	0.454545	18.9545
LYRM4-AS1	15	1.92188	0.0100624	0.520325	0.447619	15.8667
AL022322.1	26	1.67188	0.0297209	0.598131	0.4	19
SNHG11	24	1.65625	0.026733	0.603774	0.413043	18.125
AC020907.1	23	1.65625	0.0522806	0.603774	0.403162	19.1304
LINC01089	15	1.85938	0.0102459	0.537815	0.52381	20.4
CYTOR	10	2.09375	0.00125078	0.477612	0.8	18.7
NUP50-DT	23	1.6875	0.0279679	0.592593	0.458498	19.6522
U73166.1	27	1.60938	0.0472306	0.621359	0.381766	17.963
AL355303.1	18	1.8125	0.00864965	0.551724	0.503268	21.5
LINC01271	12	2.04688	0.0054601	0.48855	0.515152	17.5833
LINC00896	18	1.79688	0.0380285	0.556522	0.477124	18.7778
AL161937.2	20	1.75	0.0148041	0.571429	0.489474	19.1
RNF139-AS1	10	2.09375	0.00125078	0.477612	0.8	18.7
AC117498.2	12	1.9375	0.00395884	0.516129	0.651515	21.3333
AC008915.2	16	1.875	0.0103351	0.533333	0.5	19.25
ERVK13-1	19	1.75	0.015737	0.571429	0.473684	19.6316
AC092803.2	11	1.95312	0.0329412	0.512	0.454545	20.0909
LINC01569	12	1.96875	0.00552614	0.507937	0.575758	17.25
AC016773.1	29	1.59375	0.0683106	0.627451	0.364532	18.5172
AL731563.3	28	1.59375	0.0328762	0.627451	0.420635	19.8929
AC008124.1	16	1.82812	0.00938793	0.547009	0.525	20
AC092117.1	15	1.89062	0.00744956	0.528926	0.542857	17.8667
AL161669.3	15	1.85938	0.00768878	0.537815	0.466667	19.8
CR381653.1	11	2.0625	0.00466917	0.484848	0.436364	16.6364
LINC01431	17	1.82812	0.00891147	0.547009	0.522059	19.1765
AC135050.1	28	1.625	0.0309285	0.615385	0.412698	19.3571
AC007249.2	20	1.76562	0.0196823	0.566372	0.452632	17.95
LINC02292	19	1.82812	0.0132243	0.547009	0.491228	19.5263
AC022762.2	1	2.64062	0	0.378698	0	23
MIR4453HG	15	1.84375	0.00650113	0.542373	0.580952	19.1333
RPARP-AS1	19	1.78125	0.0108323	0.561404	0.51462	21.4737
LINC01607	13	1.92188	0.0359256	0.520325	0.5	19.7692
AC012360.3	11	1.9375	0.0105606	0.516129	0.672727	19.2727
LINC01547	23	1.70312	0.0316637	0.587156	0.418972	18.6522
AL392172.1	26	1.6875	0.0215013	0.592593	0.464615	19.8846
MIR194-2HG	4	2.375	0.00019684	0.421053	0.5	19
MAPKAPK5-AS1	8	2.09375	0.00055213	0.477612	0.75	19.75
SNHG20	15	1.875	0.0065644	0.533333	0.619048	21.3333
RAB30-AS1	28	1.60938	0.0374386	0.621359	0.391534	18.5357
AP003486.1	16	1.84375	0.0226674	0.542373	0.466667	18.5
AL353708.1	17	1.89062	0.010433	0.528926	0.529412	18.6471
AC007998.3	18	1.8125	0.0123906	0.551724	0.490196	19.5556
AC010864.1	22	1.70312	0.025115	0.587156	0.402597	18.7727
TBC1D8-AS1	20	1.78125	0.0106576	0.561404	0.484211	20.15
C1orf220	3	2.65625	0.00349553	0.376471	0.333333	11
AL671710.1	2	2.70312	0.00151351	0.369942	0	10.5
LINC01703	14	1.9375	0.0214488	0.516129	0.43956	18.1429
TRIM52-AS1	2	2.65625	8.267e-05	0.376471	0	15
SNHG1	8	2.10938	0.00090152	0.474074	0.642857	20.125
DANCR	7	2.15625	0.00107928	0.463768	0.714286	17.2857
AC012313.5	19	1.79688	0.0289657	0.556522	0.350877	16.6842
AC245060.2	12	2.0625	0.0016255	0.484848	0.712121	18.0833
AC087482.1	1	2.57812	0	0.387879	0	29
AL591848.3	1	2.90625	0	0.344086	0	13
AC084018.1	1	2.9375	0	0.340426	0	11
